# Supplementary material for: Whole Exome Sequencing in Healthy Individuals of Extreme Constitution Types Reveals Differential Disease Risk: A Novel Approach towards Predictive Medicine
Source: MDPI journal article supplement (doi:10.3390/jpm12030489), 2022-03-18
Supplement: s1 [file s1]

## Sheet: NI_Mastersheet
Chr_pos (GrCh37)	SNP	Ref_allele	Alt_allele	V_Alt_Allele_frq	P_Alt_Allele_frq	K_Alt_Allele_frq	Genic_Region	Gene	Gene_Impact	Profile	Class	Fisher's original Pvalue	Permuted_Pvalue
1_1654038	rs61777494	G	A	0.192308	0.0454545	0.384615	UTR5	CDK11B	0	P-K+	PK	0.006289	0.02414
1_2283117	rs4648831	C	T	0.194444	0.0833333	0.305556	ncRNA_exonic	LOC100129534	0	P-K+	PK	0.03457	0.0632
1_2418625	rs7512269	C	T	0.0833333	0.277778	0.0277778	exonic	PLCH2	synonymous SNV	P+K-	PK	0.006453	0.1065
1_2430617	rs2296442	C	T	0.333333	0.527778	0.111111	exonic	PLCH2	synonymous SNV	P+K-	PK	0.0002888	0.04661
1_2436778	rs12219	A	G	0.3125	0.222222	0.5	UTR3	PLCH2	0	P-K+	PK	0.02415	0.04165
1_2482921	rs2147905	T	C	0.647059	0.558824	0.805556	ncRNA_exonic	TNFRSF14-AS1	0	P-K+	PK	0.03903	0.05264
1_3598900	rs2273953	G	A	0.166667	0.361111	0.0555556	UTR5	TP73	0	P+K-	PK	0.002766	0.07949
1_3598910	rs1801173	C	T	0.166667	0.361111	0.0555556	UTR5	TP73	0	P+K-	PK	0.002766	0.07949
1_4843306	rs41311394	C	T	0.194444	0.305556	0.0277778	UTR3	AJAP1	0	P+K-	PK	0.002979	0.1113
1_6158562	rs2229002	A	G	0.3125	0.6	0.214286	exonic	KCNAB2	synonymous SNV	P+K-	PK	0.0037	0.02902
1_6162407	rs3827728	A	G	0.583333	0.305556	0.583333	UTR3	CHD5	0	P-K+	PK	0.03205	0.05851
1_6163135	rs1064281	C	T	0.194444	0.361111	0.111111	UTR3	CHD5	0	P+K-	PK	0.02463	0.09423
1_6163141	rs11587	C	T	0.194444	0.361111	0.111111	UTR3	CHD5	0	P+K-	PK	0.02463	0.09423
1_6163584	rs55832961	C	T	0.222222	0.416667	0.138889	UTR3	CHD5	0	P+K-	PK	0.01664	0.07949
1_6475686	rs11364	C	T	0.111111	0.0555556	0.25	UTR3	HES2	0	P-K+	PK	0.0457	0.0847
1_11097867	rs12142107	C	T	0.138889	0	0.222222	exonic	MASP2	synonymous SNV	P-K+	PK	0.005056	0.05527
1_11114940	rs13616	G	T	0.176471	0.0882353	0.34375	exonic	SRM	synonymous SNV	P-K+	PK	0.01568	0.05757
1_11205058	rs1057079	C	T	0.666667	0.805556	0.555556	exonic	MTOR	synonymous SNV	P+K-	PK	0.04198	0.1187
1_12268499	rs1061631	G	A	0.166667	0.111111	0.333333	UTR3	TNFRSF1B	0	P-K+	PK	0.0451	0.1348
1_13942731	rs11880	T	C	0.138889	0.25	0.0555556	UTR3	PDPN	0	P+K-	PK	0.0457	0.1514
1_13943724	rs1061615	T	C	0.111111	0.25	0.0294118	UTR3	PDPN	0	P+K-	PK	0.0138	0.0847
1_15793913	rs1042010	G	A	0.111111	0.361111	0.111111	exonic	CELA2A	synonymous SNV	P+K-	PK	0.02463	0.1348
1_15850603	rs4645983	G	A	0.0833333	0.352941	0.0882353	exonic	CASP9	synonymous SNV	P+K-	PK	0.01736	0.118
1_15850613	rs1052571	G	A	0.472222	0.558824	0.264706	exonic	CASP9	nonsynonymous SNV	P+K-	PK	0.02577	0.05028
1_15892415	rs2236215	A	C	0.111111	0.388889	0.111111	exonic	DNAJC16	synonymous SNV	P+K-	PK	0.01295	0.1552
1_15896984	rs6656907	A	G	0.1	0.285714	0.0416667	UTR3	DNAJC16	0	P+K-	PK	0.02811	0.1175
1_15909744	rs11580170	C	T	0.138889	0.388889	0.138889	exonic	AGMAT	nonsynonymous SNV	P+K-	PK	0.03086	0.1552
1_16112795	rs7663	A	G	0.333333	0.53125	0.233333	UTR3	FBLIM1	0	P+K-	PK	0.02043	0.03778
1_16383448	rs10803415	A	C	0.861111	0.777778	0.970588	UTR3	CLCNKB	0	P-K+	PK	0.02813	0.0847
1_16384656	rs2863443	G	T	0.888889	0.833333	1	UTR3	FAM131C	0	P-K+	PK	0.02493	0.1514
1_16386447	rs11576236	G	C	0.861111	0.833333	1	exonic	FAM131C	nonsynonymous SNV	P-K+	PK	0.02493	0.1065
1_17083597	rs186155999	G	A	0.147059	0	0.142857	ncRNA_exonic	LOC102724562	0	P-K+	PK	0.04826	0.1049
1_17555508	rs2977234	G	T	0.222222	0.388889	0.138889	exonic	PADI1	synonymous SNV	P+K-	PK	0.03086	0.07949
1_19186129	rs9701796	G	C	0.805556	0.555556	0.805556	exonic	TAS1R2	nonsynonymous SNV	P-K+	PK	0.04198	0.07208
1_20236731	rs17401735	A	G	0.25	0.305556	0.0277778	UTR3	OTUD3	0	P+K-	PK	0.002979	0.09423
1_20238343	rs1046548	A	G	0.388889	0.5	0.138889	UTR3	OTUD3	0	P+K-	PK	0.002046	0.07208
1_20238466	rs17401847	A	G	0.194444	0.166667	0	UTR3	OTUD3	0	P+K-	PK	0.02493	0.1065
1_20301964	rs11677	G	A	0.138889	0.0555556	0.333333	UTR3	PLA2G2A	0	P-K+	PK	0.00586	0.0632
1_20304926	rs4744	G	A	0.111111	0.194444	0	exonic	PLA2G2A	synonymous SNV	P+K-	PK	0.01133	0.1514
1_20306146	rs11573156	G	C	0.111111	0.194444	0	UTR5	PLA2G2A	0	P+K-	PK	0.01133	0.1514
1_21810202	rs200265424	T	G	0.6875	0.458333	0.85	UTR3	NBPF3	0	P-K+	PK	0.0114	0.01307
1_21810575	rs3010179	T	C	0.821429	0.676471	0.964286	UTR3	NBPF3	0	P-K+	PK	0.007722	0.01911
1_21810586	rs78156905	C	T	0.846154	0.6	0.961538	UTR3	NBPF3	0	P-K+	PK	0.001412	0.01344
1_21810587	rs3010180	A	G	0.846154	0.6	0.961538	UTR3	NBPF3	0	P-K+	PK	0.001412	0.01344
1_21810625	rs3010181	T	C	0.846154	0.625	0.964286	UTR3	NBPF3	0	P-K+	PK	0.003268	0.01132
1_22855441	rs12137696	C	T	0.0555556	0.03125	0.25	UTR3	ZBTB40	0	P-K+	PK	0.02648	0.02753
1_22902772	rs56218493	C	T	0.222222	0.0555556	0.25	exonic	EPHA8	synonymous SNV	P-K+	PK	0.0457	0.0847
1_22915674	rs56044578	G	A	0.166667	0.0294118	0.266667	exonic	EPHA8	synonymous SNV	P-K+	PK	0.00965	0.05757
1_23410742	rs506004	A	C	0.529412	0.71875	0.433333	UTR3	LUZP1	0	P+K-	PK	0.03863	0.04202
1_23755513	rs1198430	T	C	0.861111	0.794118	0.972222	UTR3	ASAP3	0	P-K+	PK	0.02564	0.08024
1_23756155	rs1198432	T	C	0.861111	0.777778	0.972222	UTR3	ASAP3	0	P-K+	PK	0.02781	0.1065
1_24482059	rs11249002	C	T	0.272727	0.115385	0.5	UTR3	IFNLR1	0	P-K+	PK	0.00476	0.02107
1_24798001	rs195728	G	A	0.382353	0.617647	0.235294	UTR3	NIPAL3	0	P+K-	PK	0.002941	0.04313
1_25168124	rs9259	G	C	0.527778	0.588235	0.3125	UTR3	CLIC4	0	P+K-	PK	0.02908	0.05062
1_26752992	rs4659441	T	C	0.861111	0.970588	0.78125	UTR3	LIN28A	0	P+K-	PK	0.02492	0.08323
1_26756209	rs6697410	G	T	0.805556	0.972222	0.794118	UTR3	LIN28A	0	P+K-	PK	0.02564	0.05943
1_27679797	rs3813795	A	G	0.777778	0.583333	0.833333	exonic	SYTL1	nonsynonymous SNV	P-K+	PK	0.0367	0.09423
1_28282206	rs3813804	C	T	0.25	0.361111	0.111111	exonic	SMPDL3B	synonymous SNV	P+K-	PK	0.02463	0.07949
1_32158374	rs3818788	T	C	0.666667	0.444444	0.722222	exonic	COL16A1	synonymous SNV	P-K+	PK	0.03066	0.07907
1_32673866	rs41302746	G	C	0.555556	0	0.388889	UTR3	IQCC	0	P-K+	PK	0.0008305	0.009386
1_33067758	rs139407329	C	T	0.115385	0	0.230769	UTR3	ZBTB8A	0	P-K+	PK	0.02296	0.02484
1_35562965	rs2971408	G	A	0.84375	0.733333	1	exonic	ZMYM1	nonsynonymous SNV	P-K+	PK	0.001019	0.02492
1_38227086	rs4653328	A	T	0.0833333	0.416667	0.0833333	exonic	EPHA10	nonsynonymous SNV	P+K-	PK	0.002157	0.07949
1_38268836	rs12395	T	C	0.111111	0.305556	0.0588235	UTR3	YRDC	0	P+K-	PK	0.01228	0.0632
1_38268918	rs7686	T	C	0.472222	0.611111	0.305556	UTR3	YRDC	0	P+K-	PK	0.01739	0.09353
1_38275802	rs473279	T	C	0.555556	0.722222	0.444444	UTR3	MTF1	0	P+K-	PK	0.03066	0.09353
1_38278579	rs28411352	C	T	0.111111	0.305556	0.0555556	UTR3	MTF1	0	P+K-	PK	0.01201	0.0847
1_38327982	rs3843	G	T	0.555556	0.694444	0.416667	UTR3	INPP5B	0	P+K-	PK	0.03205	0.09619
1_38338795	rs11488569	A	G	0.5	0.666667	0.388889	exonic	INPP5B	nonsynonymous SNV	P+K-	PK	0.0329	0.05851
1_38449910	rs11210870	T	C	0.472222	0.222222	0.527778	exonic	SF3A3	synonymous SNV	P-K+	PK	0.01419	0.05851
1_40306898	rs7315	T	C	0.529412	0.323529	0.611111	UTR3	TRIT1	0	P-K+	PK	0.01879	0.05886
1_43119661	rs16829829	C	A	0.0277778	0.222222	0	exonic	CCDC30	nonsynonymous SNV	P+K-	PK	0.005056	0.05527
1_46871986	rs324419	T	C	0.75	0.861111	0.583333	exonic	FAAH	synonymous SNV	P+K-	PK	0.01664	0.06404
1_47078637	rs4660947	T	C	0.75	0.666667	0.916667	exonic	MOB3C	synonymous SNV	P-K+	PK	0.01824	0.06404
1_47284923	rs12059860	T	C	0	0.194444	0	UTR3	CYP4B1	0	P+K-	PK	0.01145	0.05414
1_53153044	rs407856	T	C	0.264706	0.4375	0.176471	UTR3	COA7	0	P+K-	PK	0.03169	0.03799
1_53459690	rs11581638	C	T	0.0769231	0.0357143	0.269231	UTR3	SCP2	0	P-K+	PK	0.02219	0.02801
1_59148118	rs17118103	A	T	0.388889	0.111111	0.333333	exonic	MYSM1	nonsynonymous SNV	P-K+	PK	0.0451	0.04661
1_62728784	rs2666472	A	G	0.75	0.805556	0.527778	exonic	KANK4	nonsynonymous SNV	P+K-	PK	0.02344	0.04661
1_62728838	rs2258470	T	C	0.75	0.805556	0.527778	exonic	KANK4	nonsynonymous SNV	P+K-	PK	0.02344	0.04661
1_62728861	rs2260581	T	C	0.75	0.805556	0.527778	exonic	KANK4	synonymous SNV	P+K-	PK	0.02344	0.04661
1_62728918	rs2262110	G	A	0.75	0.805556	0.527778	exonic	KANK4	synonymous SNV	P+K-	PK	0.02344	0.04661
1_65297983	rs1556561	A	T	0.25	0.529412	0.235294	UTR3	RAVER2	0	P+K-	PK	0.02383	0.07392
1_65298791	rs2780889	A	T	0.205882	0.533333	0.107143	UTR3	RAVER2	0	P+K-	PK	0.000694	0.04133
1_65311262	rs2230587	G	A	0.194444	0.333333	0.111111	exonic	JAK1	synonymous SNV	P+K-	PK	0.0451	0.09423
1_65858145	rs4325172	G	A	0.416667	0.277778	0.558824	exonic	DNAJC6	synonymous SNV	P-K+	PK	0.02826	0.0561
1_65897951	rs7602	G	A	0.333333	0.5	0.194444	UTR3	LEPROT	0	P+K-	PK	0.01253	0.07907
1_66058513	rs1137101	A	G	0.571429	0.321429	0.676471	exonic	LEPR	nonsynonymous SNV	P-K+	PK	0.01009	0.03747
1_82302600	rs12064537	T	C	0.2	0.558824	0.28125	UTR5	ADGRL2	0	P+K-	PK	0.02739	0.04313
1_84864256	rs3738573	G	C	0.194444	0.333333	0.111111	exonic	DNASE2B	nonsynonymous SNV	P+K-	PK	0.0451	0.0632
1_85039955	rs2303307	G	A	0.590909	0.588235	0.272727	exonic	CTBS	synonymous SNV	P+K-	PK	0.02902	0.03699
1_85113203	rs2994949	T	C	0.676471	0.777778	0.470588	exonic	SSX2IP	synonymous SNV	P+K-	PK	0.01281	0.04475
1_86947975	rs1321694	A	T	0.361111	0.583333	0.294118	exonic	CLCA1	synonymous SNV	P+K-	PK	0.01787	0.03022
1_108307727	rs7528153	T	A	0.388889	0.235294	0.527778	exonic	VAV3	nonsynonymous SNV	P-K+	PK	0.01504	0.05371
1_109747635	rs17034539	C	T	0.194444	0.117647	0.361111	UTR3	KIAA1324	0	P-K+	PK	0.02528	0.055
1_110306469	rs878605	C	G	0.194444	0.138889	0.388889	UTR5	EPS8L3	0	P-K+	PK	0.03086	0.055
1_110306531	rs943641	A	G	0.194444	0.138889	0.416667	UTR5	EPS8L3	0	P-K+	PK	0.01664	0.06404
1_111857951	rs61756687	A	G	0.194444	0.0277778	0.25	exonic	CHIA	nonsynonymous SNV	P-K+	PK	0.01359	0.0847
1_112042149	rs3393	C	T	0.444444	0.416667	0.722222	UTR3	ADORA3	0	P-K+	PK	0.01666	0.05851
1_112269353	rs41314013	G	A	0	0.194444	0	UTR3	FAM212B	0	P+K-	PK	0.01133	0.1987
1_113063125	rs910697	A	G	0.411765	0.235294	0.5	exonic	WNT2B	synonymous SNV	P-K+	PK	0.02755	0.07233
1_113063771	rs2273368	C	T	0.111111	0.138889	0.388889	UTR3	WNT2B	0	P-K+	PK	0.03086	0.07949
1_113217311	rs3748655	G	C	0.0833333	0.0625	0.264706	UTR5	MOV10	0	P-K+	PK	0.04521	0.05489
1_113236681	rs3748656	C	T	0.138889	0.111111	0.444444	exonic	MOV10	synonymous SNV	P-K+	PK	0.003191	0.055
1_113237171	rs883593	A	G	0.111111	0.138889	0.416667	exonic	MOV10	synonymous SNV	P-K+	PK	0.01664	0.07949
1_113239382	rs17030651	G	A	0.111111	0.138889	0.388889	exonic	MOV10	synonymous SNV	P-K+	PK	0.03086	0.07949
1_113241052	rs2306940	T	C	0.111111	0.138889	0.416667	exonic	MOV10	synonymous SNV	P-K+	PK	0.01664	0.07949
1_113243048	rs6679	C	T	0.138889	0.138889	0.382353	exonic	MOV10	synonymous SNV	P-K+	PK	0.02847	0.05152
1_114455907	rs6674384	G	A	0.194444	0.352941	0.111111	UTR3	DCLRE1B	0	P+K-	PK	0.02259	0.032
1_118065841	rs1290558	A	G	0.294118	0.205882	0.571429	UTR3	MAN1A2	0	P-K+	PK	0.004012	0.04073
1_118067306	rs964530	T	A	0.208333	0.285714	0.0666667	UTR3	MAN1A2	0	P+K-	PK	0.03839	0.06272
1_118068034	rs41312696	A	G	0.3125	0.433333	0.125	UTR3	MAN1A2	0	P+K-	PK	0.009854	0.06659
1_120164303	rs12081887	C	T	0.444444	0.705882	0.388889	UTR3	ZNF697	0	P+K-	PK	0.009376	0.05487
1_145283980	rs200732919	C	T	0.111111	0	0.25	UTR3	NOTCH2NL	0	P-K+	PK	0.01131	0.04329
1_146626922	rs6937	T	C	0.266667	0.294118	0.0666667	UTR3	PRKAB2	0	P+K-	PK	0.02587	0.04403
1_146767353	rs6538	G	A	0.194444	0.264706	0.0588235	UTR3	CHD1L	0	P+K-	PK	0.04458	0.08934
1_147091972	rs3820129	C	T	0.25	0.25	0.0588235	exonic	BCL9	nonsynonymous SNV	P+K-	PK	0.04626	0.07517
1_150266338	rs3818978	T	A	0.694444	0.666667	0.388889	UTR5	MRPS21	0	P+K-	PK	0.0329	0.08497
1_150783985	rs11552229	T	C	0.555556	0.666667	0.382353	UTR3	ARNT	0	P+K-	PK	0.03038	0.09345
1_150808889	rs2228099	C	G	0.555556	0.666667	0.361111	exonic	ARNT	synonymous SNV	P+K-	PK	0.01776	0.09779
1_151846517	rs13320	C	T	0.25	0.318182	0.0416667	UTR3	THEM4	0	P+K-	PK	0.01973	0.02704
1_152280670	.	G	T	0.138889	0	0.166667	exonic	FLG	stopgain	P-K+	PK	0.02493	0.1514
1_152280671	.	A	C	0.138889	0	0.166667	exonic	FLG	nonsynonymous SNV	P-K+	PK	0.02493	0.1514
1_154323772	rs11589949	A	G	0.115385	0.142857	0.5	UTR3	ATP8B2	0	P-K+	PK	0.007365	0.02467
1_154401679	rs2228144	G	A	0.0277778	0.0555556	0.361111	exonic	IL6R	synonymous SNV	P-K+	PK	0.002766	0.05527
1_154474131	rs4845635	C	G	0.944444	0.944444	0.705882	exonic	SHE	synonymous SNV	P+K-	PK	0.01082	0.05527
1_154522248	rs11265634	A	G	0.916667	0.944444	0.722222	UTR3	UBE2Q1	0	P+K-	PK	0.02383	0.0847
1_155006450	rs74520550	C	A	0.0833333	0.147059	0	UTR5	DCST1	0	P+K-	PK	0.02299	0.1071
1_155006451	rs76306191	C	G	0.0833333	0.147059	0	UTR5	DCST1	0	P+K-	PK	0.02299	0.1071
1_156713631	rs73002716	C	T	0.0666667	0	0.133333	exonic	HDGF	nonsynonymous SNV	P-K+	PK	0.04913	0.06385
1_158577109	rs857685	A	C	0.111111	0.305556	0.0882353	exonic	OR10Z1	nonsynonymous SNV	P+K-	PK	0.0352	0.06405
1_158631171	rs2518493	A	C	0.0833333	0.21875	0.0277778	exonic	SPTA1	synonymous SNV	P+K-	PK	0.02191	0.05339
1_159922092	rs35541552	G	A	0	0	0.15625	exonic	SLAMF9	synonymous SNV	P-K+	PK	0.01932	0.1093
1_159922194	rs71628159	A	G	0	0	0.166667	exonic	SLAMF9	synonymous SNV	P-K+	PK	0.02493	0.1145
1_160341142	rs10908778	T	C	0.361111	0.222222	0.5	UTR3	NHLH1	0	P-K+	PK	0.02631	0.08497
1_162356487	rs1047802	G	T	0.361111	0.444444	0.1875	UTR3	C1orf226	0	P+K-	PK	0.03707	0.04346
1_162381833	rs12745630	C	G	0.361111	0.111111	0.333333	UTR5	SH2D1B	0	P-K+	PK	0.0451	0.055
1_162493123	rs2236581	A	G	0.5	0.555556	0.294118	UTR3	UHMK1	0	P+K-	PK	0.03241	0.09619
1_163115522	rs1395960	C	T	0.176471	0.03125	0.235294	UTR3	RGS5	0	P-K+	PK	0.02753	0.02813
1_165218792	rs10753668	G	A	0.416667	0.222222	0.527778	exonic	LMX1A	synonymous SNV	P-K+	PK	0.01419	0.08979
1_167599583	rs3738221	G	A	0.0882353	0	0.133333	UTR5	RCSD1	0	P-K+	PK	0.03802	0.05548
1_169337376	rs2275299	C	T	0.388889	0.416667	0.176471	UTR5	BLZF1	0	P+K-	PK	0.03783	0.07208
1_169563951	rs6136	T	G	0.0555556	0.147059	0	exonic	SELP	nonsynonymous SNV	P+K-	PK	0.02299	0.1145
1_169580885	rs6131	C	T	0.205882	0.0833333	0.294118	exonic	SELP	nonsynonymous SNV	P-K+	PK	0.032	0.1291
1_172381284	rs17278379	T	C	0.0555556	0.194444	0	UTR3	DNM3	0	P+K-	PK	0.01133	0.1145
1_176809368	rs12118034	C	T	0.294118	0.138889	0.388889	exonic	PAPPA2	synonymous SNV	P-K+	PK	0.03086	0.046
1_176832552	rs6413830	G	A	0.441176	0.638889	0.323529	UTR3	ASTN1	0	P+K-	PK	0.009835	0.06084
1_179044302	rs2018786	G	A	0.0416667	0.230769	0.0357143	UTR3	FAM20B	0	P+K-	PK	0.0468	0.0706
1_179519880	rs1060775	T	C	0.916667	0.833333	1	UTR3	NPHS2	0	P-K+	PK	0.02511	0.05184
1_179520151	rs1410590	C	T	0.90625	0.823529	1	UTR3	NPHS2	0	P-K+	PK	0.02586	0.04913
1_179520506	rs1410592	G	A	0.583333	0.527778	0.794118	exonic	NPHS2	synonymous SNV	P-K+	PK	0.02445	0.08047
1_181057874	rs6425663	T	G	0.84375	0.666667	0.933333	UTR5	IER5	0	P-K+	PK	0.01378	0.04137
1_185069843	rs16865296	T	A	0.03125	0.21875	0.0294118	UTR3	RNF2	0	P+K-	PK	0.02492	0.05813
1_186275564	rs12128607	C	T	0.0833333	0.194444	0	exonic	PRG4	nonsynonymous SNV	P+K-	PK	0.01133	0.1514
1_186281696	rs7756	T	G	0.472222	0.735294	0.361111	UTR3	TPR	0	P+K-	PK	0.002056	0.09138
1_186291512	rs10911846	T	C	0.0833333	0.176471	0	exonic	TPR	synonymous SNV	P+K-	PK	0.02457	0.1071
1_186301447	rs7526540	T	C	0.0882353	0.176471	0	exonic	TPR	synonymous SNV	P+K-	PK	0.01026	0.1071
1_186321242	rs61744267	C	T	0	0.15625	0	exonic	TPR	nonsynonymous SNV	P+K-	PK	0.02253	0.1142
1_193054485	rs10801173	T	C	0.5	0.4375	0.75	UTR3	TROVE2	0	P-K+	PK	0.01909	0.02368
1_193074651	rs10921310	T	A	0.777778	0.694444	0.966667	exonic	GLRX2	nonsynonymous SNV	P-K+	PK	0.004333	0.06151
1_193075108	rs912071	C	T	0.642857	0.454545	0.833333	UTR5	GLRX2	0	P-K+	PK	0.0124	0.0187
1_196621053	rs35836460	T	C	0	0	0.176471	UTR5	CFH	0	P-K+	PK	0.02478	0.06233
1_197480927	rs12142127	C	T	0.176471	0.382353	0.117647	exonic	DENND1B	synonymous SNV	P+K-	PK	0.02335	0.1038
1_202550272	rs2008455	G	A	0.583333	0.805556	0.527778	UTR3	PPP1R12B	0	P+K-	PK	0.02344	0.1488
1_202550547	rs2362941	G	A	0.5	0.694444	0.352941	UTR3	PPP1R12B	0	P+K-	PK	0.007955	0.08879
1_202552100	rs4950858	G	A	0.5	0.735294	0.411765	UTR3	PPP1R12B	0	P+K-	PK	0.01356	0.08374
1_202560412	rs1040010	T	C	0.583333	0.777778	0.5	UTR3	SYT2	0	P+K-	PK	0.02631	0.1435
1_202564330	rs6427958	A	T	0.583333	0.805556	0.527778	UTR3	SYT2	0	P+K-	PK	0.02344	0.1285
1_202565948	rs504261	G	A	0.416667	0.194444	0.444444	exonic	SYT2	synonymous SNV	P-K+	PK	0.04198	0.1285
1_202861342	rs12089566	A	G	0.5	0.472222	0.235294	UTR3	KLHL12	0	P+K-	PK	0.04833	0.05371
1_203744258	rs4951198	T	C	0.318182	0.05	0.375	UTR3	LAX1	0	P-K+	PK	0.01303	0.01376
1_203823066	rs7311	G	C	0.611111	0.647059	0.388889	UTR3	ZC3H11A	0	P+K-	PK	0.03521	0.06084
1_206730641	rs71633591	C	A	0.433333	0.147059	0.40625	UTR5	RASSF5	0	P-K+	PK	0.02667	0.09387
1_207102293	rs13190	A	T	0.194444	0.111111	0.361111	UTR3	PIGR	0	P-K+	PK	0.02463	0.06404
1_207110936	rs291096	T	C	0.25	0.111111	0.333333	exonic	PIGR	synonymous SNV	P-K+	PK	0.0451	0.09423
1_207246004	rs6667268	A	G	0.444444	0.764706	0.441176	UTR3	PFKFB2	0	P+K-	PK	0.01251	0.05886
1_207249855	rs11120148	G	A	0.5	0.735294	0.444444	UTR3	PFKFB2	0	P+K-	PK	0.01661	0.05851
1_207250456	rs1060287	C	T	0.472222	0.777778	0.444444	UTR3	PFKFB2	0	P+K-	PK	0.007305	0.09353
1_207250570	rs1565	A	G	0.472222	0.722222	0.4375	UTR3	PFKFB2	0	P+K-	PK	0.02609	0.0541
1_207250631	rs1560	A	G	0.416667	0.777778	0.4	UTR3	PFKFB2	0	P+K-	PK	0.002445	0.06084
1_208207839	rs3736963	G	A	0.416667	0.194444	0.444444	exonic	PLXNA2	synonymous SNV	P-K+	PK	0.04198	0.04661
1_212900311	rs2292214	G	C	0.583333	0.805556	0.555556	UTR3	NSL1	0	P+K-	PK	0.04198	0.07907
1_212900487	rs2244935	A	G	0.805556	1	0.735294	exonic	NSL1	synonymous SNV	P+K-	PK	0.0008065	0.08543
1_212908922	rs3006242	T	C	0.833333	1	0.735294	UTR3	NSL1	0	P+K-	PK	0.0008065	0.1113
1_212908929	rs6700465	T	C	0.583333	0.823529	0.529412	UTR3	NSL1	0	P+K-	PK	0.01859	0.07233
1_212910930	rs7522100	G	A	0.555556	0.805556	0.5	UTR3	NSL1	0	P+K-	PK	0.01724	0.07474
1_212911836	rs15702	T	C	0.558824	0.823529	0.466667	exonic	NSL1	nonsynonymous SNV	P+K-	PK	0.003757	0.06148
1_212989891	rs1133462	C	T	0.227273	0.416667	0.0416667	UTR3	TATDN3	0	P+K-	PK	0.004387	0.0243
1_212990108	rs6540767	T	A	0.5	0.766667	0.416667	UTR3	TATDN3	0	P+K-	PK	0.0122	0.04378
1_213068971	rs12074192	T	G	0.722222	0.882353	0.588235	UTR3	FLVCR1	0	P+K-	PK	0.01209	0.06701
1_213069258	rs11582817	T	A	0.5	0.625	0.34375	UTR3	FLVCR1	0	P+K-	PK	0.04457	0.07934
1_213069783	rs6682947	A	G	0.777778	0.861111	0.611111	UTR3	FLVCR1	0	P+K-	PK	0.03086	0.1073
1_214813487	rs2070066	A	G	0.0882353	0	0.142857	exonic	CENPF	synonymous SNV	P-K+	PK	0.04199	0.05819
1_222919895	rs2378607	T	G	0.638889	0.735294	0.470588	exonic	FAM177B	nonsynonymous SNV	P+K-	PK	0.04647	0.08128
1_225611661	rs1056607	C	T	0.583333	0.722222	0.444444	exonic	LBR	synonymous SNV	P+K-	PK	0.03066	0.08497
1_225675459	rs4653643	A	G	0.555556	0.694444	0.361111	UTR3	ENAH	0	P+K-	PK	0.008935	0.05851
1_225682560	rs6751	G	A	0.53125	0.764706	0.28125	UTR3	ENAH	0	P+K-	PK	0.000166	0.0257
1_226352498	rs2306120	T	G	0.264706	0.588235	0.25	exonic	ACBD3	nonsynonymous SNV	P+K-	PK	0.0068	0.04
1_227069737	rs6759	C	T	0.333333	0.25	0.527778	exonic	PSEN2	synonymous SNV	P-K+	PK	0.02873	0.08497
1_227083550	rs8383	C	T	0.361111	0.25	0.529412	UTR3	PSEN2	0	P-K+	PK	0.02644	0.07392
1_227181554	rs1062908	C	G	0.166667	0.0277778	0.222222	UTR3	CDC42BPA	0	P-K+	PK	0.02781	0.05527
1_227181555	rs1045252	A	G	0.166667	0.0277778	0.222222	UTR3	CDC42BPA	0	P-K+	PK	0.02781	0.05527
1_228548197	rs10158354	G	A	0.0833333	0.0277778	0.205882	exonic	OBSCN	nonsynonymous SNV	P-K+	PK	0.02564	0.05184
1_231470772	rs11122272	A	G	0.458333	0.0909091	0.666667	UTR3	EXOC8	0	P-K+	PK	7.055e-05	0.02469
1_231953639	rs2759341	G	A	0.875	0.958333	0.545455	ncRNA_exonic	DISC2	0	P+K-	PK	0.001403	0.02704
1_234582651	rs4920246	T	C	0.305556	0.361111	0.111111	exonic	TARBP1	nonsynonymous SNV	P+K-	PK	0.02463	0.06404
1_234744413	rs4636	C	A	0.233333	0.411765	0.125	exonic	IRF2BP2	synonymous SNV	P+K-	PK	0.01256	0.04903
1_236380913	rs1749596	T	C	0.392857	0.230769	0.583333	UTR3	ERO1B	0	P-K+	PK	0.01997	0.02725
1_236717926	rs2275687	T	C	0.441176	0.5	0.194444	exonic	HEATR1	nonsynonymous SNV	P+K-	PK	0.01253	0.07392
1_236755837	rs2564739	C	T	0.5	0.694444	0.388889	exonic	HEATR1	synonymous SNV	P+K-	PK	0.01739	0.09779
1_236758887	rs2794751	T	C	0.5	0.75	0.388889	exonic	HEATR1	nonsynonymous SNV	P+K-	PK	0.003944	0.09619
1_236767330	rs10802551	A	G	0.5	0.694444	0.323529	exonic	HEATR1	synonymous SNV	P+K-	PK	0.003773	0.09294
1_237062327	rs73131123	C	T	0.0588235	0	0.125	UTR3	MTR	0	P-K+	PK	0.04989	0.05813
1_241695792	rs3819976	T	C	0.117647	0.166667	0	exonic	KMO	synonymous SNV	P+K-	PK	0.02493	0.05571
2_1320143	rs4927635	C	T	0.5	0.75	0.470588	exonic	SNTG2	nonsynonymous SNV	P+K-	PK	0.02644	0.05256
2_3391826	rs11127423	C	T	0.5	0.0555556	0.363636	exonic	TRAPPC12	synonymous SNV	P-K+	PK	0.02657	0.03556
2_3392295	rs11686212	A	G	0.527778	0.361111	0.638889	exonic	TRAPPC12	nonsynonymous SNV	P-K+	PK	0.03318	0.1554
2_3593038	rs146150366	A	G	0.0555556	0.147059	0	UTR3	RNASEH1	0	P+K-	PK	0.02299	0.1145
2_6109725	rs13024179	G	C	0.305556	0.166667	0.416667	ncRNA_exonic	LINC01105	0	P-K+	PK	0.0367	0.07208
2_6112702	rs13015403	C	T	0.25	0.111111	0.392857	ncRNA_exonic	LINC01105	0	P-K+	PK	0.01563	0.05161
2_6119477	rs2609177	A	G	0.705882	0.735294	0.472222	ncRNA_exonic	LINC01105	0	P+K-	PK	0.03022	0.07474
2_9546415	.	T	G	0.0416667	0	0.227273	UTR3	ITGB1BP1	0	P-K+	PK	0.04918	0.1144
2_10193069	rs72786612	A	T	0.09375	0.1875	0	UTR3	KLF11	0	P+K-	PK	0.008279	0.05813
2_10198113	rs6717452	C	A	0.638889	0.441176	0.777778	UTR3	CYS1	0	P-K+	PK	0.006469	0.03408
2_10924524	rs1198873	T	C	0.472222	0.794118	0.444444	UTR3	ATP6V1C2	0	P+K-	PK	0.003384	0.09619
2_10933249	rs4799	C	T	0.361111	0.666667	0.25	exonic	PDIA6	synonymous SNV	P+K-	PK	0.0008003	0.09619
2_10942687	rs4758	C	T	0.444444	0.722222	0.382353	exonic	PDIA6	synonymous SNV	P+K-	PK	0.007646	0.09138
2_15747393	rs10929378	C	T	0.722222	0.5	0.777778	exonic	DDX1	synonymous SNV	P-K+	PK	0.02631	0.05054
2_20866699	rs77525005	G	C	0.194444	0.222222	0	UTR5	GDF7	0	P+K-	PK	0.005129	0.02813
2_20866720	rs10205228	G	C	0.794118	0.777778	1	UTR5	GDF7	0	P-K+	PK	0.005517	0.02813
2_20870579	rs13013489	G	A	0.75	0.733333	0.961538	exonic	GDF7	synonymous SNV	P-K+	PK	0.02857	0.03316
2_23865260	rs642931	T	C	0.861111	0.722222	0.972222	exonic	KLHL29	synonymous SNV	P-K+	PK	0.006453	0.05527
2_24342505	rs1056122	T	C	0.5	0.666667	0.333333	exonic	PFN4	synonymous SNV	P+K-	PK	0.009049	0.09353
2_24414002	rs7564420	A	G	0.411765	0.4375	0.7	UTR3	FAM228A	0	P-K+	PK	0.04448	0.05062
2_24414400	rs13387930	A	G	0.333333	0.5	0.153846	UTR3	FAM228A	0	P+K-	PK	0.01374	0.03377
2_29129418	rs11688605	A	G	0.333333	0.222222	0.470588	exonic	WDR43	synonymous SNV	P-K+	PK	0.04346	0.05258
2_29274704	rs61749512	C	T	0.305556	0.0555556	0.25	exonic	TOGARAM2	synonymous SNV	P-K+	PK	0.0457	0.07949
2_30865272	rs200720157	T	C	0	0	0.153846	UTR3	LCLAT1	0	P-K+	PK	0.0407	0.09745
2_44396235	rs12712912	T	G	0.916667	0.852941	1	UTR5	PPM1B	0	P-K+	PK	0.02299	0.05527
2_44502788	rs3738985	A	C	0.805556	0.805556	1	exonic	SLC3A1	synonymous SNV	P-K+	PK	0.01145	0.0847
2_48822540	rs7574549	T	C	0.0833333	0	0.133333	UTR3	STON1	0	P-K+	PK	0.03802	0.04989
2_54480332	rs843707	G	A	0.323529	0.138889	0.472222	UTR3	TSPYL6	0	P-K+	PK	0.00429	0.04833
2_54482964	rs843704	C	T	0.333333	0.0833333	0.361111	exonic	TSPYL6	nonsynonymous SNV	P-K+	PK	0.009279	0.1073
2_62733253	rs11676567	C	T	0.472222	0.611111	0.25	exonic	TMEM17	synonymous SNV	P+K-	PK	0.003944	0.09779
2_63283178	rs17850223	C	G	0.15625	0.361111	0.107143	exonic	OTX1	synonymous SNV	P+K-	PK	0.02304	0.03483
2_63348818	rs369149310	T	C	0	0	0.166667	UTR3	WDPCP	0	P-K+	PK	0.02202	0.05219
2_64320746	rs10496105	G	A	0.194444	0.235294	0.0555556	UTR3	PELI1	0	P+K-	PK	0.04263	0.06405
2_64327544	rs329498	G	T	0.333333	0.194444	0.617647	exonic	PELI1	synonymous SNV	P-K+	PK	0.0005272	0.04722
2_64327592	rs329497	T	C	0.277778	0.222222	0.617647	exonic	PELI1	synonymous SNV	P-K+	PK	0.001412	0.05371
2_65313758	rs61758846	G	C	0.2	0.0588235	0.25	UTR3	CEP68	0	P-K+	PK	0.04137	0.04444
2_68622952	rs1050181	G	C	0.0833333	0.34375	0.0666667	UTR3	PLEK	0	P+K-	PK	0.01122	0.03206
2_71412126	rs187181	T	C	0.441176	0.40625	0.6875	UTR3	PAIP2B	0	P-K+	PK	0.0437	0.0516
2_74185876	rs4777	A	T	0.527778	0.617647	0.333333	ncRNA_intronic	DGUOK-AS1	0	P+K-	PK	0.03038	0.03521
2_75275565	rs59224645	G	A	0.0277778	0	0.133333	UTR3	TACR1	0	P-K+	PK	0.04313	0.1142
2_75276429	rs881	C	G	0.222222	0.555556	0.277778	UTR3	TACR1	0	P+K-	PK	0.03066	0.05054
2_92129892	rs200076755	T	C	0.09375	0.176471	0	ncRNA_exonic	ACTR3BP2	0	P+K-	PK	0.02478	0.05813
2_92129902	.	G	A	0.0882353	0.176471	0	ncRNA_exonic	ACTR3BP2	0	P+K-	PK	0.02801	0.05819
2_92129906	rs374769496	T	C	0.0882353	0.176471	0	ncRNA_exonic	ACTR3BP2	0	P+K-	PK	0.02801	0.05819
2_92129908	rs201989777	C	G	0.0882353	0.176471	0	ncRNA_exonic	ACTR3BP2	0	P+K-	PK	0.02801	0.05819
2_97820478	rs79756591	G	A	0.15625	0.323529	0.111111	exonic	ANKRD36	synonymous SNV	P+K-	PK	0.04203	0.1291
2_97864333	rs61218502	C	A	0.321429	0.107143	0.416667	exonic	ANKRD36	nonsynonymous SNV	P-K+	PK	0.01056	0.03444
2_97864334	rs56835800	C	T	0.321429	0.107143	0.416667	exonic	ANKRD36	synonymous SNV	P-K+	PK	0.01056	0.03444
2_97864374	rs60795069	G	T	0.363636	0.1	0.411765	exonic	ANKRD36	nonsynonymous SNV	P-K+	PK	0.009456	0.03123
2_100016713	rs2290257	G	C	0.166667	0.305556	0.0833333	UTR3	EIF5B	0	P+K-	PK	0.03457	0.0847
2_105665808	rs11538197	C	T	0.0294118	0.205882	0.0277778	exonic	MRPS9	synonymous SNV	P+K-	PK	0.02564	0.05805
2_107007576	rs60043380	A	T	0.529412	0.833333	0.46875	ncRNA_exonic	PLGLA	0	P+K-	PK	0.002058	0.04475
2_108507268	rs148942086	T	C	0.46875	0.527778	0.222222	UTR3	RGPD4	0	P+K-	PK	0.01419	0.08879
2_108628585	rs11889263	T	G	0.555556	0.527778	0.764706	UTR3	SLC5A7	0	P-K+	PK	0.04833	0.08515
2_108628586	rs58143025	G	T	0.555556	0.527778	0.764706	UTR3	SLC5A7	0	P-K+	PK	0.04833	0.08515
2_109124534	rs2378152	T	C	0	0	0.142857	ncRNA_intronic	GCC2-AS1	0	P-K+	PK	0.04199	0.04913
2_109124536	rs1138412	C	T	0	0	0.142857	ncRNA_intronic	GCC2-AS1	0	P-K+	PK	0.04199	0.04913
2_109293130	rs115305258	A	G	0.194444	0.1	0.535714	exonic	LIMS1	synonymous SNV	P-K+	PK	0.0004985	0.01981
2_109512234	rs13001699	T	C	0.861111	0.611111	0.861111	UTR3	EDAR	0	P-K+	PK	0.03086	0.1348
2_109513654	rs12623957	G	A	0.861111	0.611111	0.852941	exonic	EDAR	synonymous SNV	P-K+	PK	0.03174	0.1073
2_110261564	rs34248247	C	T	0.0833333	0.0277778	0.222222	UTR3	SH3RF3	0	P-K+	PK	0.02781	0.1065
2_112812842	rs4078410	T	C	0.666667	0.583333	0.823529	UTR5	TMEM87B	0	P-K+	PK	0.03783	0.06554
2_112945220	rs11123130	G	A	0.264706	0.09375	0.34375	UTR3	FBLN7	0	P-K+	PK	0.03191	0.04245
2_113403662	rs11123144	T	C	0.888889	0.694444	0.916667	UTR5	SLC20A1	0	P-K+	PK	0.03457	0.0847
2_113940681	rs3748914	T	C	0.416667	0.527778	0.264706	exonic	PSD4	synonymous SNV	P+K-	PK	0.03022	0.09281
2_113940839	rs4849167	G	C	0.416667	0.555556	0.294118	exonic	PSD4	nonsynonymous SNV	P+K-	PK	0.03241	0.09281
2_114258384	rs2144270	G	A	0.34375	0.472222	0.194444	UTR3	FOXD4L1	0	P+K-	PK	0.02344	0.03444
2_120125363	rs3091405	C	A	0.305556	0.194444	0.472222	UTR5	DBI	0	P-K+	PK	0.02344	0.08497
2_120197670	rs1042656	G	A	0.472222	0.611111	0.333333	UTR3	SCTR	0	P+K-	PK	0.0329	0.05851
2_121976519	rs6541771	G	A	0.555556	0.527778	0.861111	UTR3	TFCP2L1	0	P-K+	PK	0.00429	0.07907
2_121981210	rs10200387	G	A	0.5	0.416667	0.75	UTR3	TFCP2L1	0	P-K+	PK	0.008046	0.05611
2_121981608	rs3795853	A	G	0.5	0.416667	0.75	UTR3	TFCP2L1	0	P-K+	PK	0.008046	0.05611
2_121981950	rs11890430	A	G	0.470588	0.416667	0.764706	exonic	TFCP2L1	synonymous SNV	P-K+	PK	0.003908	0.05062
2_121989489	rs2304667	G	A	0.333333	0.333333	0.111111	exonic	TFCP2L1	synonymous SNV	P+K-	PK	0.0451	0.1187
2_128757995	rs17015864	A	C	0.222222	0.0277778	0.25	exonic	SAP130	synonymous SNV	P-K+	PK	0.01359	0.0847
2_130831509	rs146466901	G	A	0.555556	0.318182	0.615385	UTR3	POTEF	0	P-K+	PK	0.04869	0.06226
2_133542014	rs12616282	T	C	0.611111	0.764706	0.470588	exonic	NCKAP5	synonymous SNV	P+K-	PK	0.02383	0.04722
2_135214042	rs2289469	G	A	0.333333	0.111111	0.361111	UTR3	TMEM163	0	P-K+	PK	0.02463	0.1073
2_135214259	rs2289470	G	A	0.194444	0.0555556	0.277778	UTR3	TMEM163	0	P-K+	PK	0.02383	0.1113
2_136393658	rs961360	A	G	0.305556	0.0882353	0.333333	exonic	R3HDM1	nonsynonymous SNV	P-K+	PK	0.01867	0.07949
2_136633962	rs1057031	G	A	0.361111	0.111111	0.333333	UTR5	MCM6	0	P-K+	PK	0.0451	0.06404
2_136743143	rs2278682	G	C	0.388889	0.138889	0.388889	ncRNA_intronic	DARS-AS1	0	P-K+	PK	0.03086	0.07208
2_141274576	rs4954672	T	C	0.588235	0.527778	0.794118	exonic	LRP1B	synonymous SNV	P-K+	PK	0.02445	0.03408
2_144194565	rs17230746	C	T	0.0882353	0	0.321429	exonic	ARHGAP15	synonymous SNV	P-K+	PK	0.0003405	0.05314
2_144697113	rs787172	T	C	0.65625	0.970588	0.75	ncRNA_intronic	LOC101928386	0	P+K-	PK	0.0182	0.03154
2_152331418	rs1065177	C	G	0.59375	0.666667	0.323529	exonic	RIF1	nonsynonymous SNV	P+K-	PK	0.01161	0.04222
2_152387553	rs4664475	T	C	0.472222	0.555556	0.294118	exonic	NEB	synonymous SNV	P+K-	PK	0.03241	0.09294
2_152422076	rs2288210	C	G	0.53125	0.666667	0.176471	exonic	NEB	nonsynonymous SNV	P+K-	PK	3.865e-05	0.05028
2_152422087	rs2288211	A	G	0.294118	0.333333	0.111111	exonic	NEB	synonymous SNV	P+K-	PK	0.0451	0.09573
2_152490219	rs6709886	A	G	0.558824	0.694444	0.305556	exonic	NEB	synonymous SNV	P+K-	PK	0.001968	0.05851
2_153405594	rs1155779	G	A	0.692308	0.8125	0.416667	exonic	FMNL2	synonymous SNV	P+K-	PK	0.004267	0.03271
2_157406249	rs2116665	G	A	0.555556	0.555556	0.8125	exonic	GPD2	nonsynonymous SNV	P-K+	PK	0.03707	0.05258
2_159672252	rs61740878	G	A	0.176471	0.294118	0.0833333	exonic	DAPL1	synonymous SNV	P+K-	PK	0.032	0.09827
2_161174693	rs1430	C	T	0.2	0.235294	0	exonic	RBMS1	synonymous SNV	P+K-	PK	0.004992	0.05489
2_163128824	rs3747517	T	C	0.470588	0.764706	0.527778	exonic	IFIH1	nonsynonymous SNV	P+K-	PK	0.04833	0.07892
2_168106085	rs16853328	G	A	0.111111	0.305556	0.0555556	exonic	XIRP2	nonsynonymous SNV	P+K-	PK	0.01201	0.0632
2_169630483	rs1063729	G	A	0.527778	0.472222	0.777778	ncRNA_exonic	CERS6-AS1	0	P-K+	PK	0.01419	0.09619
2_171242761	rs17497636	G	A	0.147059	0.0882353	0.305556	exonic	MYO3B	synonymous SNV	P-K+	PK	0.0352	0.07284
2_172338300	rs3821084	T	G	0.40625	0.441176	0.176471	UTR3	DCAF17	0	P+K-	PK	0.03444	0.04313
2_172413018	rs2542939	A	G	0.5	0.352941	0.692308	UTR3	CYBRD1	0	P-K+	PK	0.01824	0.02036
2_175297360	rs10930663	G	A	0.1875	0.3125	0.0882353	UTR3	GPR155	0	P+K-	PK	0.03065	0.04133
2_178489007	rs147772961	A	G	0.0555556	0	0.133333	UTR3	PDE11A	0	P-K+	PK	0.04313	0.05813
2_179188959	rs35032920	G	A	0.25	0.0277778	0.222222	exonic	OSBPL6	nonsynonymous SNV	P-K+	PK	0.02781	0.1348
2_179201048	rs16866263	G	T	0.25	0.0277778	0.222222	exonic	OSBPL6	synonymous SNV	P-K+	PK	0.02781	0.1348
2_179369440	rs112872449	T	C	0	0	0.142857	ncRNA_intronic	MIR548N	0	P-K+	PK	0.0367	0.09897
2_182794534	rs1051085	G	A	0.833333	0.642857	0.916667	UTR3	SSFA2	0	P-K+	PK	0.02414	0.04917
2_188208130	rs67231021	A	G	0.0666667	0.25	0.0333333	UTR3	CALCRL	0	P+K-	PK	0.02687	0.02801
2_190649316	rs5742933	G	C	0.0833333	0.0294118	0.235294	UTR5	PMS1	0	P-K+	PK	0.02718	0.05389
2_191066683	rs4853685	C	T	0.0454545	0	0.208333	UTR3	C2orf88	0	P-K+	PK	0.02006	0.06923
2_191208347	rs1372054	G	A	0.694444	0.861111	0.611111	UTR5	INPP1	0	P+K-	PK	0.03086	0.06404
2_191365123	rs61743479	G	A	0.361111	0.388889	0.111111	UTR3	MFSD6	0	P+K-	PK	0.01295	0.06404
2_191366579	rs7721	T	G	0.333333	0.382353	0.0882353	UTR3	MFSD6	0	P+K-	PK	0.008709	0.04332
2_198001319	rs3731569	A	G	0.194444	0.25	0.0555556	exonic	ANKRD44	synonymous SNV	P+K-	PK	0.0457	0.0847
2_202902431	rs16838661	A	G	0.0277778	0.147059	0	UTR3	FZD7	0	P+K-	PK	0.02299	0.05414
2_203633245	rs17807135	A	C	0.117647	0.235294	0.0277778	UTR3	FAM117B	0	P+K-	PK	0.0123	0.08024
2_207824384	rs11903403	T	G	0.472222	0.166667	0.470588	exonic	CPO	nonsynonymous SNV	P-K+	PK	0.009535	0.05026
2_208629381	rs3731568	A	C	0.4	0.676471	0.21875	UTR3	FZD5	0	P+K-	PK	0.0002282	0.02588
2_209007559	rs796287	T	G	0.777778	0.888889	0.647059	exonic	CRYGB	nonsynonymous SNV	P+K-	PK	0.02259	0.032
2_213870678	rs7607184	T	C	0.464286	0.75	0.363636	UTR3	IKZF2	0	P+K-	PK	0.009353	0.0494
2_215645545	rs2070096	C	G	0.214286	0.125	0.4	exonic	BARD1	synonymous SNV	P-K+	PK	0.01981	0.03804
2_215839570	rs16853022	C	T	0.0277778	0.166667	0	exonic	ABCA12	synonymous SNV	P+K-	PK	0.02493	0.1145
2_219000734	rs1126579	T	C	0.555556	0.527778	0.764706	UTR3	CXCR2	0	P-K+	PK	0.04833	0.08047
2_220315970	rs10932806	G	A	0.5	0.361111	0.638889	exonic	SPEG	synonymous SNV	P-K+	PK	0.03318	0.09779
2_220353532	rs13026308	C	A	0.0277778	0.222222	0.0277778	exonic	SPEG	nonsynonymous SNV	P+K-	PK	0.02781	0.1145
2_223161889	rs12623857	A	G	0.944444	0.833333	1	exonic	PAX3	synonymous SNV	P-K+	PK	0.02493	0.1145
2_224866387	rs12138	G	A	0.277778	0.333333	0.111111	exonic	SERPINE2	synonymous SNV	P+K-	PK	0.0451	0.055
2_227954599	rs2229814	G	A	0.694444	0.694444	0.411765	exonic	COL4A4	nonsynonymous SNV	P+K-	PK	0.02958	0.0561
2_228128540	rs10205042	C	T	0.833333	0.972222	0.735294	exonic	COL4A3	synonymous SNV	P+K-	PK	0.005731	0.0632
2_228736341	rs56333712	C	G	0.194444	0.0277778	0.25	UTR5	DAW1	0	P-K+	PK	0.01359	0.1514
2_228758554	rs1715828	A	T	0.166667	0.0277778	0.25	exonic	DAW1	nonsynonymous SNV	P-K+	PK	0.01359	0.1514
2_231077725	rs1129411	A	G	0.96875	1	0.8	exonic	SP110	nonsynonymous SNV	P+K-	PK	0.009659	0.04313
2_231222655	rs10498250	G	T	0.0357143	0	0.142857	exonic	SP140L	synonymous SNV	P-K+	PK	0.0367	0.08662
2_231222675	rs4973318	T	C	0.0357143	0	0.142857	exonic	SP140L	nonsynonymous SNV	P-K+	PK	0.0367	0.08662
2_233273244	rs17416141	C	A	0.194444	0.111111	0.361111	exonic	ALPPL2	nonsynonymous SNV	P-K+	PK	0.02463	0.03457
2_233324491	rs2678481	A	C	0.0833333	0	0.166667	UTR3	ALPI	0	P-K+	PK	0.02493	0.05527
2_234380123	rs882428	A	G	0.555556	0.805556	0.555556	UTR3	DGKD	0	P+K-	PK	0.04198	0.07907
2_237033073	rs1530936	T	G	0.444444	0.441176	0.176471	UTR3	AGAP1	0	P+K-	PK	0.03444	0.07392
2_237033077	rs11894960	A	T	0.444444	0.441176	0.166667	UTR3	AGAP1	0	P+K-	PK	0.0184	0.07392
2_239133980	rs7558525	C	T	0.2	0.0357143	0.291667	ncRNA_exonic	LOC151174	0	P-K+	PK	0.01799	0.04029
2_240982116	rs72993513	C	A	0.0357143	0.142857	0	intergenic	OR6B2;OR6B3	0	P+K-	PK	0.04826	0.08426
2_241631839	rs202017172	G	A	0.166667	0.0588235	0.25	exonic	AQP12A	nonsynonymous SNV	P-K+	PK	0.04137	0.08406
2_242028741	rs1062748	A	G	0.194444	0.0833333	0.361111	UTR3	MTERF4	0	P-K+	PK	0.009279	0.07949
2_242033394	rs78834190	C	A	0.194444	0.0555556	0.361111	UTR3	SNED1	0	P-K+	PK	0.002766	0.07949
2_242033770	rs2302047	T	A	0.194444	0.0833333	0.361111	exonic	MTERF4	nonsynonymous SNV	P-K+	PK	0.009279	0.07949
2_242082262	rs6709462	T	C	0.5	0.472222	0.75	exonic	PASK	synonymous SNV	P-K+	PK	0.02873	0.08979
2_242082480	rs758068	A	C	0.411765	0.333333	0.694444	UTR5	PASK	0	P-K+	PK	0.004328	0.05851
2_242122391	rs3868	T	C	0.75	0.611111	0.888889	UTR3	PPP1R7	0	P-K+	PK	0.01295	0.07949
3_3197918	rs17027638	A	G	0.277778	0.441176	0.176471	exonic	CRBN	synonymous SNV	P+K-	PK	0.03444	0.05662
3_3841431	rs2633833	C	G	0.638889	0.75	0.433333	UTR5	LRRN1	0	P+K-	PK	0.01188	0.07892
3_4791679	rs17041331	A	G	0.0882353	0.03125	0.25	ncRNA_exonic	EGOT	0	P-K+	PK	0.02648	0.05342
3_5258985	rs2648646	T	C	0.888889	0.777778	0.970588	UTR3	EDEM1	0	P-K+	PK	0.02813	0.04263
3_5260444	rs74552995	T	G	0.277778	0.166667	0.416667	UTR3	EDEM1	0	P-K+	PK	0.0367	0.1187
3_5260445	rs75953299	C	A	0.277778	0.166667	0.416667	UTR3	EDEM1	0	P-K+	PK	0.0367	0.1187
3_9908749	rs1053239	G	C	0.277778	0.0277778	0.25	UTR3	CIDEC	0	P-K+	PK	0.01359	0.0847
3_9959713	rs4686383	C	T	0.138889	0.166667	0	exonic	IL17RC	synonymous SNV	P+K-	PK	0.02493	0.05527
3_9974809	rs76999397	G	A	0.0555556	0.0277778	0.2	exonic	IL17RC	synonymous SNV	P-K+	PK	0.04078	0.05805
3_10048601	rs7638846	A	G	0.285714	0.15625	0.466667	ncRNA_exonic	EMC3-AS1	0	P-K+	PK	0.01258	0.02304
3_10143328	rs59318799	A	T	0.0769231	0	0.423077	UTR3	FANCD2	0	P-K+	PK	0.0002558	0.01579
3_11079520	rs2944367	A	G	0.138889	0.222222	0.0277778	UTR3	SLC6A1	0	P+K-	PK	0.02781	0.1065
3_16269555	rs842280	G	T	0.0833333	0	0.147059	UTR3	GALNT15	0	P-K+	PK	0.02299	0.05058
3_16299968	rs842252	G	A	0.305556	0.222222	0.5	UTR3	DPH3	0	P-K+	PK	0.02631	0.08497
3_24142719	rs35316896	G	A	0.166667	0.111111	0.333333	ncRNA_exonic	LINC00691	0	P-K+	PK	0.0451	0.0632
3_27326097	rs11129280	G	T	0.277778	0.416667	0.166667	exonic	NEK10	synonymous SNV	P+K-	PK	0.0367	0.07208
3_27326451	rs10510594	A	G	0.25	0.40625	0.147059	exonic	NEK10	synonymous SNV	P+K-	PK	0.02667	0.04133
3_27332820	rs10510592	A	G	0.264706	0.416667	0.166667	exonic	NEK10	nonsynonymous SNV	P+K-	PK	0.0367	0.06404
3_27416730	rs41276515	T	C	0.153846	0.4	0.0384615	UTR3	SLC4A7	0	P+K-	PK	0.001412	0.05105
3_27417179	rs41295960	T	C	0.208333	0.384615	0.107143	UTR3	SLC4A7	0	P+K-	PK	0.02564	0.02926
3_27472936	rs3755652	C	T	0.222222	0.0277778	0.235294	exonic	SLC4A7	nonsynonymous SNV	P-K+	PK	0.0123	0.0632
3_27473066	rs13077400	A	G	0.222222	0.0277778	0.222222	exonic	SLC4A7	synonymous SNV	P-K+	PK	0.02781	0.0847
3_27490194	rs13096477	T	C	0.222222	0.0277778	0.222222	exonic	SLC4A7	synonymous SNV	P-K+	PK	0.02781	0.0847
3_36897812	rs11712950	T	C	0.266667	0.0454545	0.333333	exonic	TRANK1	nonsynonymous SNV	P-K+	PK	0.02329	0.03662
3_37028933	rs200607906	A	T	0.166667	0.285714	0	UTR3	EPM2AIP1	0	P+K-	PK	0.01699	0.02158
3_37030754	rs115211110	T	C	0.03125	0	0.133333	UTR3	EPM2AIP1	0	P-K+	PK	0.04913	0.05219
3_38674712	rs6599230	T	C	0.777778	0.833333	0.555556	exonic	SCN5A	synonymous SNV	P+K-	PK	0.02018	0.07208
3_42914325	rs3732861	G	A	0.138889	0.25	0.0277778	UTR3	CYP8B1	0	P+K-	PK	0.01359	0.1514
3_42947557	rs118170974	T	G	0.166667	0.222222	0.0277778	UTR5	ZNF662	0	P+K-	PK	0.02781	0.1514
3_44762830	rs56084453	A	G	0.125	0	0.15625	exonic	ZNF502	nonsynonymous SNV	P-K+	PK	0.01932	0.06265
3_44964485	rs1979946	C	G	0.5	0.84375	0.588235	UTR3	ZDHHC3	0	P+K-	PK	0.03009	0.03174
3_45052775	rs6794	G	C	0.555556	0.852941	0.588235	exonic	EXOSC7	nonsynonymous SNV	P+K-	PK	0.02912	0.04165
3_46244280	rs3136668	G	A	0.361111	0.333333	0.0833333	UTR3	CCR1	0	P+K-	PK	0.01824	0.07949
3_48470756	rs9817615	T	C	0.125	0.0333333	0.384615	UTR5	PLXNB1	0	P-K+	PK	0.001489	0.02456
3_49460350	rs1464569	A	G	0.833333	1	0.852941	UTR3	NICN1	0	P+K-	PK	0.02299	0.05184
3_49570882	rs1050088	T	C	0.472222	0.777778	0.444444	UTR3	DAG1	0	P+K-	PK	0.007305	0.0329
3_50114515	rs7061	C	T	0.805556	0.75	0.944444	exonic	RBM6	synonymous SNV	P-K+	PK	0.0457	0.1113
3_50144951	rs1061474	T	C	0.805556	0.75	0.944444	exonic	RBM5	synonymous SNV	P-K+	PK	0.0457	0.1113
3_50153356	rs1138536	T	C	0.805556	0.75	0.944444	exonic	RBM5	synonymous SNV	P-K+	PK	0.0457	0.1113
3_50369546	rs2073498	C	A	0.138889	0.25	0.0555556	exonic	RASSF1	nonsynonymous SNV	P+K-	PK	0.0457	0.1113
3_50597092	rs1034405	G	A	0.818182	0.6875	1	exonic	C3orf18	nonsynonymous SNV	P-K+	PK	0.008702	0.04595
3_51420421	rs4441646	A	C	0.323529	0.411765	0.09375	UTR3	DOCK3	0	P+K-	PK	0.004395	0.05709
3_53857803	rs12676	A	C	0.722222	0.944444	0.75	exonic	CHDH	nonsynonymous SNV	P+K-	PK	0.0457	0.09423
3_57557134	rs6907	T	A	0.138889	0.0277778	0.205882	UTR3	ARF4	0	P-K+	PK	0.02564	0.08024
3_58280089	rs6925	G	A	0.527778	0.333333	0.611111	UTR3	ABHD6	0	P-K+	PK	0.0329	0.05851
3_58280311	rs8723	A	G	0.305556	0.529412	0.194444	UTR3	ABHD6	0	P+K-	PK	0.00565	0.0367
3_58280406	rs9986	A	G	0.333333	0.558824	0.25	UTR3	ABHD6	0	P+K-	PK	0.0141	0.04833
3_58292300	rs17355543	C	T	0.361111	0.611111	0.222222	UTR5	HTD2;RPP14	0	P+K-	PK	0.001666	0.03066
3_58304112	rs1135089	C	T	0.382353	0.5	0.21875	UTR3	HTD2;RPP14	0	P+K-	PK	0.02337	0.02631
3_58305235	rs10687	G	T	0.305556	0.527778	0.166667	UTR3	HTD2;RPP14	0	P+K-	PK	0.004229	0.03569
3_58413405	rs1126737	T	C	0.277778	0.5	0.117647	UTR3	PDHB	0	P+K-	PK	0.001089	0.02912
3_58413662	rs7230	G	A	0.333333	0.555556	0.222222	UTR3	PDHB	0	P+K-	PK	0.007305	0.05054
3_69054341	rs6781612	T	C	0.361111	0.277778	0.617647	exonic	EOGT	synonymous SNV	P-K+	PK	0.007646	0.05258
3_69070457	rs1745	G	A	0.285714	0.107143	0.4	UTR3	TMF1	0	P-K+	PK	0.01593	0.02558
3_69156421	rs9816032	G	A	0.555556	0.611111	0.34375	intergenic	ARL6IP5;LMOD3	0	P+K-	PK	0.03219	0.06084
3_73024350	rs1052278	C	A	0.323529	0.588235	0.3125	UTR3	GXYLT2	0	P+K-	PK	0.02908	0.04509
3_75786833	rs139448820	G	A	0.416667	0.428571	0.115385	exonic	ZNF717	synonymous SNV	P+K-	PK	0.01481	0.03373
3_75786845	rs62250105	T	C	0.416667	0.428571	0.115385	exonic	ZNF717	synonymous SNV	P+K-	PK	0.01481	0.03373
3_75786888	rs1615736	C	T	0.392857	0.5	0.0454545	exonic	ZNF717	nonsynonymous SNV	P+K-	PK	0.0005521	0.03015
3_75790797	rs147946451	C	T	0.346154	0.423077	0	exonic	ZNF717	nonsynonymous SNV	P+K-	PK	0.003635	0.02123
3_75790811	rs199577560	G	T	0.346154	0.423077	0	exonic	ZNF717	nonsynonymous SNV	P+K-	PK	0.003635	0.02123
3_75790814	rs200578600	C	T	0.346154	0.423077	0	exonic	ZNF717	nonsynonymous SNV	P+K-	PK	0.003635	0.02123
3_75790838	rs140982339	C	T	0.375	0.416667	0	exonic	ZNF717	stopgain	P+K-	PK	0.0008649	0.01819
3_75790860	rs150203551	C	T	0.375	0.375	0	exonic	ZNF717	nonsynonymous SNV	P+K-	PK	0.001638	0.02161
3_81643167	rs2172397	T	C	0.972222	0.823529	1	exonic	GBE1	nonsynonymous SNV	P-K+	PK	0.02457	0.05548
3_97607290	rs13065340	G	A	0.147059	0.294118	0.0294118	exonic	CRYBG3	synonymous SNV	P+K-	PK	0.00619	0.05943
3_97660084	rs11544446	C	T	0.194444	0.294118	0	exonic	CRYBG3	synonymous SNV	P+K-	PK	0.000902	0.04626
3_100084203	rs1561743	C	G	0.333333	0.166667	0.470588	UTR3	TOMM70	0	P-K+	PK	0.009535	0.06797
3_100368546	rs61730367	A	G	0.0882353	0	0.15625	exonic	ADGRG7	nonsynonymous SNV	P-K+	PK	0.01932	0.1071
3_100467673	rs1059503	G	A	0.194444	0.277778	0.0625	UTR3	TFG	0	P+K-	PK	0.02638	0.0544
3_101066717	rs2433031	T	A	0.466667	0.125	0.375	exonic	SENP7	nonsynonymous SNV	P-K+	PK	0.04133	0.04282
3_101713604	rs10936873	A	G	0.147059	0.205882	0	ncRNA_exonic	LINC02085	0	P+K-	PK	0.0111	0.08024
3_105266274	rs16851279	T	C	0.2	0.0666667	0.366667	exonic	ALCAM	synonymous SNV	P-K+	PK	0.01025	0.02916
3_105266331	rs9855810	A	G	0.0882353	0.166667	0	exonic	ALCAM	synonymous SNV	P+K-	PK	0.02202	0.05819
3_108021634	rs10933937	G	A	0	0.222222	0	UTR5	HHLA2	0	P+K-	PK	0.03348	0.04145
3_111918216	rs13098660	A	G	0.8	0.6875	0.941176	exonic	SLC9C1	synonymous SNV	P-K+	PK	0.01026	0.03696
3_111921225	rs6781844	G	T	0.852941	0.735294	0.96875	exonic	SLC9C1	nonsynonymous SNV	P-K+	PK	0.0134	0.05757
3_111923123	rs4434123	G	A	0.875	0.705882	0.966667	exonic	SLC9C1	nonsynonymous SNV	P-K+	PK	0.007122	0.05757
3_111983157	rs62276974	G	A	0.125	0.235294	0	exonic	SLC9C1	synonymous SNV	P+K-	PK	0.004992	0.1061
3_112546473	rs1997281	G	A	0.361111	0.361111	0.111111	exonic	CD200R1L	synonymous SNV	P+K-	PK	0.02463	0.09423
3_114028425	rs78400980	T	C	0.0294118	0.166667	0	UTR3	TIGIT	0	P+K-	PK	0.02607	0.04989
3_114028516	rs78525596	C	T	0.03125	0.176471	0	UTR3	TIGIT	0	P+K-	PK	0.02586	0.04444
3_115440007	rs14360	T	G	0.194444	0.222222	0	UTR3	GAP43	0	P+K-	PK	0.005056	0.0847
3_118864700	rs9289121	T	C	0.5	0.388889	0.666667	UTR5	IGSF11	0	P-K+	PK	0.0329	0.05851
3_118865801	rs4077931	C	T	0.388889	0.222222	0.5	exonic	C3orf30	synonymous SNV	P-K+	PK	0.02631	0.05371
3_118867047	rs9289122	C	G	0.470588	0.382353	0.7	exonic	C3orf30	nonsynonymous SNV	P-K+	PK	0.01355	0.04109
3_118930791	rs5868	G	C	0.444444	0.611111	0.305556	UTR3	B4GALT4	0	P+K-	PK	0.01739	0.05771
3_118930884	rs6774	G	A	0.166667	0.111111	0.444444	UTR3	B4GALT4	0	P-K+	PK	0.003191	0.07949
3_119243152	rs11916344	C	T	0.107143	0.0294118	0.235294	UTR3	CD80	0	P-K+	PK	0.02718	0.05292
3_119537254	rs3814057	A	C	0.277778	0.388889	0.111111	UTR3	NR1I2	0	P+K-	PK	0.01295	0.06404
3_123419782	rs3732485	G	A	0.111111	0.0277778	0.222222	exonic	MYLK	nonsynonymous SNV	P-K+	PK	0.02781	0.1065
3_123595432	rs2700408	G	A	0.444444	0.794118	0.529412	UTR5	MYLK	0	P+K-	PK	0.03916	0.05354
3_124515498	rs2291087	T	C	0.111111	0.0277778	0.222222	exonic	ITGB5	nonsynonymous SNV	P-K+	PK	0.02781	0.0847
3_124624568	rs12732	A	G	0.194444	0.382353	0.125	UTR3	MUC13	0	P+K-	PK	0.02406	0.06942
3_125314016	rs10547	C	T	0.0277778	0.166667	0	UTR5	OSBPL11	0	P+K-	PK	0.02493	0.1145
3_126260630	rs12495696	A	G	0.166667	0.0555556	0.25	exonic	CHST13	nonsynonymous SNV	P-K+	PK	0.0457	0.1113
3_126262092	rs1054097	G	C	0.194444	0.0555556	0.277778	UTR3	CHST13	0	P-K+	PK	0.02383	0.1113
3_128614185	rs1680778	A	C	0.277778	0.555556	0.25	exonic	ACAD9	synonymous SNV	P+K-	PK	0.01558	0.05371
3_128627933	rs876755	C	T	0.0833333	0.388889	0.138889	exonic	ACAD9	synonymous SNV	P+K-	PK	0.03086	0.0451
3_128720487	rs1871951	A	G	0.454545	0.7	0.277778	exonic	EFCC1	nonsynonymous SNV	P+K-	PK	0.02171	0.07554
3_129985198	rs9849611	A	G	0.222222	0.361111	0.111111	ncRNA_exonic	COL6A4P2	0	P+K-	PK	0.02463	0.06404
3_129987388	rs34622576	C	T	0.0625	0.45	0.05	ncRNA_exonic	COL6A4P2	0	P+K-	PK	0.008362	0.03373
3_129989835	rs9834306	C	T	0.222222	0.361111	0.111111	ncRNA_exonic	COL6A4P2	0	P+K-	PK	0.02463	0.055
3_129991218	rs1453253	G	A	0.222222	0.352941	0.111111	ncRNA_exonic	COL6A4P2	0	P+K-	PK	0.02259	0.055
3_130104206	rs10212372	A	G	0.3125	0.133333	0.5	exonic	COL6A5	synonymous SNV	P-K+	PK	0.008896	0.02561
3_132086825	rs2198765	G	A	0.611111	0.611111	0.333333	UTR3	ACPP	0	P+K-	PK	0.0329	0.05851
3_136574521	rs1052620	C	T	0.111111	0.323529	0.0555556	exonic	SLC35G2	synonymous SNV	P+K-	PK	0.005178	0.0632
3_138191448	rs35537868	A	T	0.138889	0.0277778	0.264706	exonic	ESYT3	nonsynonymous SNV	P-K+	PK	0.005731	0.05571
3_138213292	rs9049	C	T	0.111111	0.0277778	0.264706	UTR3	CEP70	0	P-K+	PK	0.005731	0.05527
3_138218994	rs35340237	T	C	0.111111	0.0277778	0.25	exonic	CEP70	nonsynonymous SNV	P-K+	PK	0.01359	0.0847
3_140178485	rs7632885	G	A	0.555556	0.666667	0.305556	exonic	CLSTN2	nonsynonymous SNV	P+K-	PK	0.004328	0.05851
3_140285504	rs13078522	T	C	0.444444	0.722222	0.382353	UTR3	CLSTN2	0	P+K-	PK	0.007646	0.05487
3_141326602	rs295322	T	C	0.1	0.0294118	0.2	exonic	RASA2	synonymous SNV	P-K+	PK	0.04444	0.04962
3_142985100	rs1046706	G	T	0.59375	0.305556	0.59375	UTR3	SLC9A9	0	P-K+	PK	0.02716	0.05043
3_145968552	rs2867084	G	A	0.777778	0.78125	1	UTR5	PLSCR4	0	P-K+	PK	0.004322	0.04458
3_148459395	rs5182	C	T	0.638889	0.638889	0.323529	exonic	AGTR1	synonymous SNV	P+K-	PK	0.009835	0.05851
3_148460700	rs380400	G	A	0.65625	0.852941	0.588235	UTR3	AGTR1	0	P+K-	PK	0.02912	0.05396
3_148895654	rs34394958	A	G	0	0.205882	0	exonic	CP	synonymous SNV	P+K-	PK	0.0111	0.05058
3_151034602	rs1472122	G	A	0.470588	0.705882	0.411765	UTR5	GPR87	0	P+K-	PK	0.02717	0.0834
3_151044903	rs12497019	C	T	0.352941	0.117647	0.382353	UTR3	P2RY13	0	P-K+	PK	0.02335	0.06021
3_151056616	rs6785930	G	A	0.277778	0.0833333	0.382353	exonic	P2RY12	synonymous SNV	P-K+	PK	0.003991	0.05152
3_151151220	rs7611956	C	A	0.75	0.888889	0.676471	UTR3	MED12L	0	P+K-	PK	0.04203	0.0451
3_151154666	rs2172250	T	C	0.777778	0.888889	0.676471	exonic	IGSF10	synonymous SNV	P+K-	PK	0.04203	0.05152
3_151981159	rs2288295	C	T	0.705882	0.5625	0.833333	ncRNA_exonic	MBNL1-AS1	0	P-K+	PK	0.02827	0.03778
3_151983261	rs391173	T	C	0.722222	0.555556	0.805556	ncRNA_exonic	MBNL1-AS1	0	P-K+	PK	0.04198	0.07907
3_156255689	rs1027915	G	A	0.875	0.735294	0.96875	UTR3	KCNAB1	0	P-K+	PK	0.0134	0.04137
3_156258817	rs3773713	T	C	0.75	0.533333	0.933333	UTR3	SSR3	0	P-K+	PK	0.0009098	0.03509
3_156259279	rs1129109	C	T	0.882353	0.7	0.96875	UTR3	SSR3	0	P-K+	PK	0.005138	0.04137
3_156259348	rs1129094	G	A	0.766667	0.607143	0.923077	UTR3	SSR3	0	P-K+	PK	0.009934	0.03405
3_156259485	rs8665	G	A	0.777778	0.588235	0.888889	UTR3	SSR3	0	P-K+	PK	0.005796	0.05152
3_156260245	rs1510277	G	A	0.888889	0.705882	0.944444	UTR3	SSR3	0	P-K+	PK	0.01082	0.0457
3_156423072	rs346003	A	T	0.416667	0.264706	0.53125	UTR3	TIPARP	0	P-K+	PK	0.04313	0.079
3_160143939	rs202139466	C	T	0	0.125	0	exonic	SMC4	synonymous SNV	P+K-	PK	0.04989	0.1084
3_160155047	rs4679886	C	T	0.166667	0.333333	0.0333333	UTR3	TRIM59	0	P+K-	PK	0.005579	0.08941
3_169684433	rs9836316	G	A	0.111111	0.25	0.0555556	ncRNA_exonic	LOC100128164	0	P+K-	PK	0.0457	0.05527
3_169809559	rs62293457	A	C	0.269231	0.5	0.178571	UTR3	PHC3	0	P+K-	PK	0.01545	0.0218
3_169809560	rs62293458	C	A	0.269231	0.5	0.178571	UTR3	PHC3	0	P+K-	PK	0.01545	0.0218
3_170184132	rs10936636	C	T	0.277778	0.470588	0.166667	UTR3	SLC7A14	0	P+K-	PK	0.01564	0.06488
3_172046861	rs2270568	T	C	0.647059	0.46875	0.735294	exonic	FNDC3B	synonymous SNV	P-K+	PK	0.04313	0.04647
3_172350340	rs7432459	G	T	0.166667	0.235294	0.0357143	UTR3	NCEH1	0	P+K-	PK	0.03319	0.04403
3_179115229	rs11539412	T	C	0.0555556	0.147059	0	UTR3	GNB4	0	P+K-	PK	0.02299	0.1145
3_182880630	rs3811731	G	A	0.0666667	0.28125	0.0588235	UTR5	LAMP3	0	P+K-	PK	0.02099	0.03634
3_183432983	rs3736535	C	T	0.194444	0.0833333	0.305556	exonic	YEATS2	synonymous SNV	P-K+	PK	0.03457	0.1348
3_184062776	rs9839000	A	G	0.416667	0.472222	0.222222	UTR3	FAM131A	0	P+K-	PK	0.04661	0.08979
3_184099378	rs35929225	C	A	0.222222	0.416667	0.138889	exonic	CHRD	synonymous SNV	P+K-	PK	0.01664	0.1073
3_186509517	rs187868	G	A	0.527778	0.361111	0.638889	exonic	RFC4	synonymous SNV	P-K+	PK	0.03318	0.09619
3_186952914	rs72549262	G	C	0.15625	0.09375	0.333333	UTR3	MASP1	0	P-K+	PK	0.02916	0.03859
3_190023552	rs8298	T	C	0.5	0.714286	0.25	UTR3	CLDN1	0	P+K-	PK	0.001128	0.02143
3_190024188	rs2204226	G	A	0.59375	0.647059	0.375	UTR3	CLDN1	0	P+K-	PK	0.04789	0.04896
3_190024457	rs9290928	A	G	0.59375	0.735294	0.392857	UTR3	CLDN1	0	P+K-	PK	0.009697	0.04481
3_190024893	rs17500920	T	A	0.136364	0.208333	0	UTR3	CLDN1	0	P+K-	PK	0.02006	0.04483
3_194115840	rs73069165	C	T	0.0416667	0.277778	0.0384615	UTR3	GP5	0	P+K-	PK	0.03419	0.06876
3_194124421	rs11900	A	G	0.361111	0.529412	0.21875	UTR3	ATP13A3	0	P+K-	PK	0.01191	0.08133
3_194308889	rs3818946	A	G	0.235294	0.416667	0.117647	ncRNA_intronic	TMEM44-AS1	0	P+K-	PK	0.006832	0.06404
3_194308934	rs6774988	C	T	0.205882	0.305556	0.0882353	ncRNA_intronic	TMEM44-AS1	0	P+K-	PK	0.0352	0.07949
3_194308980	rs6765459	G	C	0.194444	0.411765	0.117647	ncRNA_intronic	TMEM44-AS1	0	P+K-	PK	0.01209	0.07718
3_194308983	rs6779853	A	G	0.194444	0.411765	0.117647	ncRNA_intronic	TMEM44-AS1	0	P+K-	PK	0.01209	0.07718
3_194309210	rs3732473	G	A	0.194444	0.333333	0.111111	ncRNA_intronic	TMEM44-AS1	0	P+K-	PK	0.0451	0.07949
3_194790422	rs3796158	G	A	0.25	0.361111	0.111111	UTR3	XXYLT1	0	P+K-	PK	0.02463	0.055
3_195506410	rs79037473	G	A	0	0.178571	0	exonic	MUC4	nonsynonymous SNV	P+K-	PK	0.018	0.05146
3_195512103	rs437805	G	A	0.0555556	0.166667	0	exonic	MUC4	synonymous SNV	P+K-	PK	0.02493	0.1145
3_195514109	rs12489838	C	A	0.227273	0.857143	0.409091	exonic	MUC4	nonsynonymous SNV	P+K-	PK	0.0142	0.02185
3_195514728	.	T	A	0.318182	0.45	0	exonic	MUC4	synonymous SNV	P+K-	PK	0.001906	0.01823
3_196054439	rs6785339	T	G	0.611111	0.583333	0.833333	exonic	TM4SF19	nonsynonymous SNV	P-K+	PK	0.0367	0.08497
3_196461474	rs1047113	A	C	0.558824	0.527778	0.264706	UTR3	PIGX	0	P+K-	PK	0.03022	0.0541
3_196670092	rs1054278	C	A	0.638889	0.388889	0.722222	ncRNA_exonic	NCBP2-AS2	0	P-K+	PK	0.008596	0.1435
3_197884212	rs201015075	C	T	0.138889	0.388889	0.147059	ncRNA_exonic	FAM157A;FAM157B	0	P+K-	PK	0.03174	0.0451
4_760175	rs62294079	C	T	0.111111	0.0555556	0.277778	UTR3	PCGF3	0	P-K+	PK	0.02383	0.0847
4_761026	rs58212655	T	G	0.111111	0.0555556	0.277778	UTR3	PCGF3	0	P-K+	PK	0.02383	0.0847
4_761661	rs62294081	C	T	0.111111	0.0555556	0.305556	UTR3	PCGF3	0	P-K+	PK	0.01201	0.0847
4_763229	rs1811560	T	C	0.111111	0.0555556	0.305556	UTR3	PCGF3	0	P-K+	PK	0.01201	0.0847
4_763407	rs1026741	T	C	0.888889	0.944444	0.694444	UTR3	PCGF3	0	P+K-	PK	0.01201	0.0847
4_779394	rs2242237	A	G	0.5	0.25	0.527778	UTR3	CPLX1	0	P-K+	PK	0.02873	0.05771
4_1720346	rs11552262	A	G	0.0588235	0.235294	0.0294118	exonic	TMEM129	synonymous SNV	P+K-	PK	0.02718	0.05184
4_1729953	rs17132047	G	A	0.0555556	0.205882	0	exonic	TACC3	nonsynonymous SNV	P+K-	PK	0.01335	0.04989
4_4249484	rs2916465	A	C	0.464286	0.625	0.269231	UTR5	TMEM128	0	P+K-	PK	0.008933	0.02876
4_4419611	rs10002237	C	T	0.0833333	0.0555556	0.25	UTR3	NSG1	0	P-K+	PK	0.0457	0.05389
4_5749961	rs4688962	G	C	0.583333	0.416667	0.694444	exonic	EVC	synonymous SNV	P-K+	PK	0.03205	0.05771
4_6885296	rs6841334	C	G	0.194444	0.166667	0.441176	UTR3	KIAA0232	0	P-K+	PK	0.0184	0.1073
4_6885815	rs6828784	T	C	0.0833333	0	0.181818	UTR3	KIAA0232	0	P-K+	PK	0.03759	0.04483
4_7433091	rs74563302	G	C	0.111111	0.277778	0.0555556	UTR3	PSAPL1	0	P+K-	PK	0.02383	0.1113
4_7434988	rs4318651	A	G	0.607143	0.34375	0.617647	UTR3	PSAPL1	0	P-K+	PK	0.03022	0.05367
4_7743547	rs10937857	C	A	0.444444	0.25	0.527778	UTR3	SORCS2	0	P-K+	PK	0.02873	0.09619
4_7776143	rs10937859	G	A	0.0833333	0.25	0.0555556	ncRNA_exonic	AFAP1-AS1	0	P+K-	PK	0.0457	0.1065
4_10442700	rs57723486	C	T	0.352941	0.472222	0.2	UTR3	ZNF518B	0	P+K-	PK	0.03685	0.0455
4_10447168	rs66538112	C	G	0.277778	0.0882353	0.305556	exonic	ZNF518B	nonsynonymous SNV	P-K+	PK	0.0352	0.05152
4_16085358	rs7692760	A	G	0.694444	0.527778	0.8125	UTR5	PROM1	0	P-K+	PK	0.02031	0.06839
4_16085563	rs7667878	G	A	0.694444	0.527778	0.823529	UTR5	PROM1	0	P-K+	PK	0.01118	0.06797
4_16163265	rs317854	C	G	0.294118	0.470588	0.166667	UTR3	TAPT1	0	P+K-	PK	0.01564	0.06659
4_25278988	rs3796780	T	C	0.352941	0.5	0.194444	UTR3	PI4K2B	0	P+K-	PK	0.01127	0.1311
4_31146615	rs7655744	C	T	0.78125	0.794118	0.5	UTR3	PCDH7	0	P+K-	PK	0.01828	0.03194
4_36317970	rs9995922	T	C	0.138889	0.361111	0.111111	exonic	DTHD1	synonymous SNV	P+K-	PK	0.02463	0.09423
4_38774785	rs10776482	A	G	0.133333	0.1	0.392857	exonic	TLR10	synonymous SNV	P-K+	PK	0.01358	0.02799
4_38774889	rs4129009	T	C	0.0833333	0.0833333	0.294118	exonic	TLR10	nonsynonymous SNV	P-K+	PK	0.032	0.05943
4_38775040	rs10776483	A	G	0.21875	0.205882	0.46875	exonic	TLR10	synonymous SNV	P-K+	PK	0.03617	0.06054
4_40121562	rs794001	G	A	0.875	0.970588	0.75	exonic	N4BP2	nonsynonymous SNV	P+K-	PK	0.01184	0.02492
4_41259633	rs5030732	C	A	0.352941	0.352941	0.117647	exonic	UCHL1	nonsynonymous SNV	P+K-	PK	0.04332	0.0451
4_47596708	rs12641823	A	G	0.1875	0.166667	0	UTR3	CORIN	0	P+K-	PK	0.02511	0.02981
4_56815145	rs80157196	T	C	0.305556	0.222222	0.529412	UTR5	CEP135	0	P-K+	PK	0.01281	0.08047
4_56899377	rs12512313	A	G	0.138889	0.28125	0.0588235	UTR3	CEP135	0	P+K-	PK	0.02099	0.06151
4_57181629	rs61750793	C	T	0.09375	0.366667	0.0714286	exonic	KIAA1211	nonsynonymous SNV	P+K-	PK	0.01061	0.02464
4_68481784	rs72642348	T	G	0.142857	0	0.269231	UTR3	UBA6	0	P-K+	PK	0.002188	0.07395
4_68481813	rs72642349	T	C	0.235294	0.0294118	0.366667	UTR3	UBA6	0	P-K+	PK	0.0007588	0.05961
4_68482401	rs28526365	T	C	0.205882	0	0.277778	UTR3	UBA6	0	P-K+	PK	0.0009713	0.06405
4_68482405	rs28735406	G	C	0.205882	0	0.277778	UTR3	UBA6	0	P-K+	PK	0.0009713	0.06405
4_68483472	rs1048447	A	G	0.214286	0	0.142857	UTR3	UBA6	0	P-K+	PK	0.0367	0.0483
4_68483534	rs7678366	G	A	0.21875	0	0.205882	UTR3	UBA6	0	P-K+	PK	0.0111	0.04263
4_68484094	rs35366816	G	A	0.0833333	0.277778	0.0555556	UTR3	UBA6	0	P+K-	PK	0.02383	0.1065
4_68497597	rs77075932	C	A	0.235294	0.0277778	0.305556	exonic	UBA6	synonymous SNV	P-K+	PK	0.002979	0.07517
4_68500171	rs10008910	A	G	0.166667	0.0294118	0.21875	exonic	UBA6	synonymous SNV	P-K+	PK	0.02492	0.05489
4_68534392	rs10010188	C	T	0.205882	0.0294118	0.28125	exonic	UBA6	nonsynonymous SNV	P-K+	PK	0.005447	0.06265
4_68562365	rs17572160	A	G	0.0833333	0.277778	0.0555556	exonic	UBA6	synonymous SNV	P+K-	PK	0.02383	0.1065
4_68567025	rs28653581	T	G	0.25	0	0.361111	ncRNA_exonic	UBA6-AS1	0	P-K+	PK	6.518e-05	0.09423
4_68586267	rs17635222	G	C	0.25	0.0277778	0.333333	ncRNA_exonic	UBA6-AS1	0	P-K+	PK	0.001336	0.09423
4_68586315	rs13124793	G	A	0.0833333	0.222222	0.0277778	ncRNA_exonic	UBA6-AS1	0	P+K-	PK	0.02781	0.1065
4_68586335	rs72643632	T	C	0.0833333	0.264706	0.0555556	ncRNA_exonic	UBA6-AS1	0	P+K-	PK	0.02186	0.0847
4_68586336	rs17635292	A	G	0.0833333	0.235294	0.0277778	ncRNA_exonic	UBA6-AS1	0	P+K-	PK	0.0123	0.08024
4_68605615	rs35845954	T	C	0.0588235	0.15625	0	UTR3	GNRHR	0	P+K-	PK	0.02253	0.1132
4_69176150	rs1715080	T	C	0.527778	0.676471	0.375	UTR3	YTHDC1	0	P+K-	PK	0.02563	0.05132
4_69178920	rs2293595	T	C	0.583333	0.638889	0.361111	UTR3	YTHDC1	0	P+K-	PK	0.03318	0.05771
4_69512595	rs35791822	C	A	0.0294118	0.25	0.03125	UTR3	UGT2B15	0	P+K-	PK	0.02648	0.1061
4_71232388	rs10031844	G	A	0.416667	0.305556	0.09375	exonic	SMR3A	nonsynonymous SNV	P+K-	PK	0.03859	0.05079
4_72433545	rs1062677	A	C	0.214286	0	0.375	exonic	SLC4A4	nonsynonymous SNV	P-K+	PK	0.0002459	0.03069
4_78636058	rs1058746	G	C	0.133333	0.15625	0	UTR3	CNOT6L	0	P+K-	PK	0.02253	0.04913
4_78636621	rs13105201	A	G	0.642857	0.529412	0.875	UTR3	CNOT6L	0	P-K+	PK	0.003038	0.02918
4_78636654	rs13128914	G	A	0.666667	0.529412	0.90625	UTR3	CNOT6L	0	P-K+	PK	0.00093	0.03194
4_78637265	rs2866690	A	G	0.75	0.529412	0.916667	UTR3	CNOT6L	0	P-K+	PK	0.001702	0.03134
4_78638491	rs3205281	T	C	0.7	0.529412	0.882353	UTR3	CNOT6L	0	P-K+	PK	0.002861	0.0317
4_78638730	rs2134048	T	C	0.705882	0.558824	0.90625	UTR3	CNOT6L	0	P-K+	PK	0.002061	0.03617
4_78783818	rs60135456	G	T	0.222222	0.444444	0.0555556	UTR5	MRPL1	0	P+K-	PK	0.0002376	0.0451
4_80993796	rs13140055	G	T	0.416667	0.388889	0.7	UTR5	ANTXR2	0	P-K+	PK	0.01453	0.05146
4_81124981	rs2292842	C	G	0.235294	0.111111	0.352941	UTR3	PRDM8	0	P-K+	PK	0.02259	0.08949
4_83274799	rs3944	A	G	0.166667	0.264706	0.0555556	UTR3	HNRNPD	0	P+K-	PK	0.02186	0.02423
4_83344850	rs13952	T	A	0.194444	0.117647	0.375	UTR3	HNRNPDL	0	P-K+	PK	0.02126	0.06839
4_83350954	rs2516817	C	T	0.194444	0.111111	0.361111	UTR5	HNRNPDL	0	P-K+	PK	0.02463	0.07949
4_88537035	rs202210195	A	G	0.21875	0	0.214286	exonic	DSPP	nonsynonymous SNV	P-K+	PK	0.007525	0.03788
4_95589337	rs7285	G	A	0.111111	0	0.176471	UTR3	PDLIM5	0	P-K+	PK	0.02457	0.05184
4_96078174	rs1863654	C	T	0.366667	0.5625	0.25	UTR3	BMPR1B	0	P+K-	PK	0.01909	0.03756
4_96171681	rs34875919	A	G	0.0555556	0.147059	0	exonic	UNC5C	synonymous SNV	P+K-	PK	0.02299	0.1145
4_98893437	rs783960	A	G	0.722222	0.588235	0.305556	exonic	STPG2	synonymous SNV	P+K-	PK	0.02958	0.09138
4_98893476	rs783959	C	T	0.722222	0.588235	0.277778	exonic	STPG2	synonymous SNV	P+K-	PK	0.0151	0.06084
4_99799922	rs10433890	G	A	0.305556	0.25	0.5	UTR3	EIF4E	0	P-K+	PK	0.04475	0.1209
4_99800174	rs4699688	G	C	0.361111	0.205882	0.5	UTR3	EIF4E	0	P-K+	PK	0.01321	0.1311
4_100082154	rs1540053	C	T	0.96875	0.694444	0.941176	ncRNA_exonic	PCNAP1	0	P-K+	PK	0.01228	0.02718
4_101107191	rs1053225	C	G	0.583333	0.638889	0.361111	UTR3	DDIT4L	0	P+K-	PK	0.03318	0.05851
4_120239244	rs10212775	G	C	0.176471	0.0882353	0.433333	UTR3	FABP2	0	P-K+	PK	0.003003	0.08159
4_120239944	rs9999724	C	T	0.153846	0	0.25	UTR3	FABP2	0	P-K+	PK	0.009054	0.04614
4_120240131	rs2964	T	C	0.176471	0.0625	0.3125	UTR3	FABP2	0	P-K+	PK	0.02214	0.09704
4_126241335	rs36052762	C	G	0.194444	0.205882	0.0277778	exonic	FAT4	nonsynonymous SNV	P+K-	PK	0.02564	0.02781
4_126372742	rs1567047	G	A	0.305556	0.416667	0.0833333	exonic	FAT4	nonsynonymous SNV	P+K-	PK	0.002157	0.055
4_144442735	rs11541117	C	T	0.53125	0.34375	0.71875	exonic	SMARCA5	synonymous SNV	P-K+	PK	0.005434	0.07382
4_154336174	rs11099880	A	T	0.285714	0.384615	0.0714286	UTR3	MND1	0	P+K-	PK	0.008229	0.03519
4_154479430	rs6848033	T	C	0.472222	0.638889	0.294118	exonic	TMEM131L	synonymous SNV	P+K-	PK	0.004668	0.05771
4_154525458	rs1063151	C	T	0.117647	0.382353	0.0833333	exonic	TMEM131L	synonymous SNV	P+K-	PK	0.003991	0.04332
4_156268065	rs17377421	C	T	0.15625	0.03125	0.214286	UTR3	MAP9	0	P-K+	PK	0.043	0.05255
4_165875608	rs6834073	T	C	0.166667	0	0.333333	UTR3	TRIM61	0	P-K+	PK	0.01906	0.02876
4_169849389	rs1071738	C	G	0.733333	0.911765	0.65625	UTR3	PALLD	0	P+K-	PK	0.01568	0.03804
4_176573028	rs72702639	T	C	0.0555556	0.222222	0.0277778	exonic	GPM6A	synonymous SNV	P+K-	PK	0.02781	0.1145
4_184236868	rs4862155	G	A	0.0769231	0	0.133333	exonic	WWC2	nonsynonymous SNV	P-K+	PK	0.04913	0.0656
4_185747176	rs116375145	G	A	0.269231	0.208333	0.583333	UTR5	ACSL1	0	P-K+	PK	0.01713	0.03057
4_186287880	rs28428553	T	C	0.111111	0.333333	0.0769231	UTR3	LRP2BP	0	P+K-	PK	0.02476	0.02492
4_186294198	rs3797026	C	T	0.138889	0.333333	0.0833333	exonic	LRP2BP	synonymous SNV	P+K-	PK	0.01824	0.0632
4_186299758	rs1048329	G	A	0.138889	0.333333	0.0833333	UTR5	LRP2BP	0	P+K-	PK	0.01824	0.0632
4_186380295	rs36007437	A	G	0.411765	0.441176	0.0588235	exonic	CCDC110	synonymous SNV	P+K-	PK	0.0004976	0.04332
4_186382206	rs11132309	A	G	0.617647	0.558824	0.264706	exonic	CCDC110	synonymous SNV	P+K-	PK	0.02577	0.03521
4_187158034	rs3733402	G	A	0.5	0.294118	0.617647	exonic	KLKB1	nonsynonymous SNV	P-K+	PK	0.01428	0.04789
4_187531022	rs28647489	A	G	0.111111	0	0.147059	exonic	FAT1	nonsynonymous SNV	P-K+	PK	0.02299	0.05571
4_190904058	rs3959347	G	A	0.235294	0.305556	0.0882353	intergenic	FRG1;FRG2	0	P+K-	PK	0.0352	0.04626
5_483564	rs56098739	A	G	0.0833333	0.222222	0.0277778	exonic	SLC9A3	synonymous SNV	P+K-	PK	0.02781	0.1065
5_1057615	rs2241606	A	G	0.555556	0.75	0.472222	exonic	SLC12A7	synonymous SNV	P+K-	PK	0.02873	0.04661
5_1244425	rs4073918	C	T	0.75	0.833333	0.583333	exonic	SLC6A18	nonsynonymous SNV	P+K-	PK	0.0367	0.07208
5_1294086	rs2736098	C	T	0.611111	0.638889	0.333333	exonic	TERT	synonymous SNV	P+K-	PK	0.01776	0.09779
5_5319407	rs16875319	T	G	0.388889	0.194444	0.527778	UTR3	ADAMTS16	0	P-K+	PK	0.006403	0.08497
5_10239278	rs2252505	C	T	0.75	0.583333	0.833333	exonic	FAM173B	synonymous SNV	P-K+	PK	0.0367	0.09423
5_31554593	rs1056491	C	G	0.411765	0.441176	0.147059	UTR3	C5orf22	0	P+K-	PK	0.01544	0.05264
5_32403346	rs4867440	C	T	0.888889	0.944444	0.764706	exonic	ZFR	nonsynonymous SNV	P+K-	PK	0.04263	0.1071
5_33946555	rs7380538	A	G	0.583333	0.444444	0.75	UTR3	SLC45A2	0	P-K+	PK	0.01558	0.08979
5_33954511	rs2287949	T	C	0.583333	0.444444	0.75	exonic	SLC45A2	nonsynonymous SNV	P-K+	PK	0.01558	0.08979
5_34908365	rs2069481	G	A	0	0.269231	0.0357143	UTR3	RAD1	0	P+K-	PK	0.02219	0.04483
5_36194007	rs3088073	T	A	0.166667	0.558824	0.194444	UTR3	NADK2	0	P+K-	PK	0.002699	0.04346
5_37333727	rs150594	A	G	0.194444	0.0555556	0.235294	exonic	NUP155	synonymous SNV	P-K+	PK	0.04263	0.0632
5_42721080	rs7442754	G	A	0.857143	0.75	1	UTR3	GHR	0	P-K+	PK	0.01823	0.02401
5_52248291	rs1054085	T	C	0.4	0.65625	0.34375	UTR3	ITGA1	0	P+K-	PK	0.0237	0.0437
5_52248776	rs6894884	T	C	0.75	0.6875	0.375	UTR3	ITGA1	0	P+K-	PK	0.02341	0.04901
5_52248817	rs6869687	C	G	0.5	0.6875	0.34375	UTR3	ITGA1	0	P+K-	PK	0.01178	0.07934
5_52248904	rs6890588	A	G	0.588235	0.6875	0.382353	UTR3	ITGA1	0	P+K-	PK	0.01555	0.08655
5_52249002	rs6895250	T	C	0.588235	0.65625	0.3	UTR3	ITGA1	0	P+K-	PK	0.006116	0.07722
5_52249028	rs3088364	T	C	0.5625	0.676471	0.323529	UTR3	ITGA1	0	P+K-	PK	0.007181	0.08366
5_52249055	rs3088363	T	C	0.5	0.676471	0.333333	UTR3	ITGA1	0	P+K-	PK	0.00806	0.09345
5_52249226	rs3088365	A	G	0.458333	0.6875	0.346154	UTR3	ITGA1	0	P+K-	PK	0.01661	0.06398
5_52249476	rs1047481	G	A	0.607143	0.6	0.230769	UTR3	ITGA1	0	P+K-	PK	0.007206	0.05302
5_52942197	rs31303	A	G	0.764706	0.911765	0.59375	exonic	NDUFS4	synonymous SNV	P+K-	PK	0.003641	0.03401
5_54404057	rs1051846	C	G	0.111111	0.25	0.0555556	exonic	GZMA	synonymous SNV	P+K-	PK	0.0457	0.0847
5_54460166	rs10059517	T	C	0.166667	0.264706	0.0588235	UTR3	GPX8	0	P+K-	PK	0.04458	0.04928
5_54461990	rs3747725	A	G	0.166667	0.25	0.0555556	UTR3	GPX8	0	P+K-	PK	0.0457	0.0632
5_54466544	rs10061133	A	G	0.166667	0.25	0.0555556	ncRNA_exonic	MIR449B	0	P+K-	PK	0.0457	0.0632
5_55082474	rs957459	C	T	0.305556	0.382353	0.117647	exonic	DDX4	synonymous SNV	P+K-	PK	0.02335	0.06554
5_63666279	rs9291808	C	A	0.4	0.617647	0.333333	UTR3	RNF180	0	P+K-	PK	0.0273	0.03408
5_63666280	rs9291809	T	G	0.4	0.617647	0.333333	UTR3	RNF180	0	P+K-	PK	0.0273	0.03408
5_63991473	rs2305962	G	C	0.388889	0.583333	0.25	exonic	FAM159B	nonsynonymous SNV	P+K-	PK	0.008046	0.08979
5_64015361	rs898211	G	C	0.352941	0.555556	0.285714	UTR3	SREK1IP1	0	P+K-	PK	0.04289	0.04647
5_64016129	rs7726384	T	C	0.388889	0.527778	0.266667	UTR3	SREK1IP1	0	P+K-	PK	0.04473	0.079
5_64016641	rs2610249	G	A	0.472222	0.694444	0.388889	UTR3	SREK1IP1	0	P+K-	PK	0.01739	0.09779
5_64017967	rs1052249	T	C	0.3125	0.5625	0.285714	UTR3	SREK1IP1	0	P+K-	PK	0.03924	0.04299
5_64018021	rs7717063	G	A	0.441176	0.75	0.366667	UTR3	SREK1IP1	0	P+K-	PK	0.00442	0.04351
5_64019841	rs10075967	C	T	0.444444	0.694444	0.323529	UTR3	SREK1IP1	0	P+K-	PK	0.003773	0.06084
5_64965137	rs27138	C	G	0.533333	0.323529	0.0357143	UTR3	SGTB	0	P+K-	PK	0.007722	0.03731
5_67589188	rs3730090	C	T	0.166667	0.235294	0.0555556	exonic	PIK3R1	synonymous SNV	P+K-	PK	0.04263	0.0457
5_74364300	rs10942729	G	A	0.611111	0.617647	0.233333	UTR3	ANKRD31	0	P+K-	PK	0.002583	0.04789
5_74400386	rs961098	G	C	0.416667	0.441176	0.176471	exonic	ANKRD31	nonsynonymous SNV	P+K-	PK	0.03444	0.04339
5_74442920	rs6888707	A	G	0.625	0.588235	0.235294	exonic	ANKRD31	synonymous SNV	P+K-	PK	0.006237	0.04789
5_74443132	rs1422698	C	T	0.583333	0.638889	0.235294	exonic	ANKRD31	nonsynonymous SNV	P+K-	PK	0.0008322	0.03318
5_74506658	rs2219745	C	T	0.388889	0.361111	0.0882353	exonic	ANKRD31	synonymous SNV	P+K-	PK	0.009567	0.02847
5_76722442	rs62362531	C	T	0.166667	0.0555556	0.25	UTR3	PDE8B	0	P-K+	PK	0.0457	0.0847
5_76722891	rs460267	T	C	0.527778	0.583333	0.3125	UTR3	PDE8B	0	P+K-	PK	0.03059	0.08658
5_79595076	rs4703807	G	A	0.533333	0.352941	0.678571	ncRNA_exonic	LOC644936	0	P-K+	PK	0.02086	0.03977
5_82934554	rs7706851	C	T	0.75	0.794118	0.529412	UTR3	HAPLN1	0	P+K-	PK	0.03916	0.04475
5_87491545	rs33699	T	C	0.357143	0.533333	0.166667	UTR3	TMEM161B	0	P+K-	PK	0.009911	0.03072
5_88015545	rs34316	A	C	0.538462	0.676471	0.392857	ncRNA_intronic	MEF2C-AS2	0	P+K-	PK	0.03991	0.08078
5_95131401	rs7622	A	G	0.388889	0.382353	0.111111	UTR3	RHOBTB3	0	P+K-	PK	0.01167	0.07392
5_96076487	rs7724759	G	A	0.166667	0.0555556	0.277778	exonic	CAST	synonymous SNV	P-K+	PK	0.02383	0.0632
5_96086334	rs754615	G	C	0.361111	0.166667	0.411765	exonic	CAST	nonsynonymous SNV	P-K+	PK	0.034	0.06554
5_96109610	rs1057569	G	A	0.0882353	0	0.205882	UTR3	CAST	0	P-K+	PK	0.0111	0.06265
5_96122210	rs10050860	C	T	0.147059	0	0.176471	exonic	ERAP1	nonsynonymous SNV	P-K+	PK	0.02457	0.05184
5_96215680	rs41506651	C	T	0.138889	0	0.194444	exonic	ERAP2	synonymous SNV	P-K+	PK	0.01133	0.1514
5_96503523	rs160632	C	T	0.555556	0.735294	0.470588	exonic	RIOK2	nonsynonymous SNV	P+K-	PK	0.04647	0.08655
5_98130541	rs77780461	C	G	0.277778	0.222222	0.472222	UTR3	RGMB	0	P-K+	PK	0.04661	0.08497
5_99897866	rs6874840	G	A	0.117647	0.0588235	0.25	exonic	FAM174A	synonymous SNV	P-K+	PK	0.04137	0.05489
5_101570689	rs11949650	G	A	0.277778	0.117647	0.472222	UTR3	SLCO4C1	0	P-K+	PK	0.001589	0.0367
5_101571690	rs7719298	T	C	0.291667	0.125	0.45	UTR3	SLCO4C1	0	P-K+	PK	0.01875	0.01898
5_127873605	rs7732639	T	C	0.305556	0.117647	0.388889	UTR5	FBN2	0	P-K+	PK	0.01339	0.06021
5_131818554	rs6873269	G	A	0.25	0.4375	0.09375	UTR3	IRF1	0	P+K-	PK	0.003826	0.04969
5_132214330	rs42395	T	C	0.65625	0.5625	0.84375	UTR3	AFF4	0	P-K+	PK	0.02719	0.03457
5_133450787	.	G	A	0	0.222222	0	exonic	TCF7	nonsynonymous SNV	P+K-	PK	0.02254	0.04145
5_135178142	rs6596270	A	G	0.166667	0.0277778	0.361111	exonic	SLC25A48	synonymous SNV	P-K+	PK	0.0005822	0.0632
5_135516188	rs3206633	T	G	0.117647	0.235294	0.0357143	UTR3	SMAD5	0	P+K-	PK	0.03319	0.03634
5_135516919	rs6871224	A	G	0.138889	0.264706	0.0555556	UTR3	SMAD5	0	P+K-	PK	0.02186	0.05943
5_135518242	rs7031	G	T	0.0833333	0.222222	0.0333333	UTR3	SMAD5	0	P+K-	PK	0.03315	0.07855
5_135527905	rs2287963	A	G	0.147059	0.222222	0.0294118	exonic	LOC389332	nonsynonymous SNV	P+K-	PK	0.02813	0.0544
5_135528316	rs6868337	C	G	0.147059	0.25	0.0555556	UTR5	LOC389332	0	P+K-	PK	0.0457	0.05943
5_140563173	rs28664170	G	T	0.0555556	0.0294118	0.235294	exonic	PCDHB16	nonsynonymous SNV	P-K+	PK	0.02718	0.05184
5_140568869	rs200567507	G	T	0.0833333	0	0.166667	exonic	PCDHB9	unknown	P-K+	PK	0.02493	0.1145
5_140620228	rs111514971	T	C	0.0555556	0.0277778	0.222222	ncRNA_exonic	PCDHB19P	0	P-K+	PK	0.02781	0.05527
5_141337225	rs164077	A	G	0.888889	0.944444	0.75	exonic	PCDH12	synonymous SNV	P+K-	PK	0.0457	0.0847
5_141973349	rs33999	C	G	0.555556	0.583333	0.323529	UTR3	FGF1	0	P+K-	PK	0.03408	0.1022
5_143538589	rs17101607	G	C	0.305556	0.264706	0.0588235	UTR3	YIPF5	0	P+K-	PK	0.04458	0.0632
5_143539142	rs1043292	T	C	0.333333	0.333333	0.0833333	UTR3	YIPF5	0	P+K-	PK	0.01824	0.0632
5_147822135	rs1128450	T	G	0.416667	0.529412	0.235294	UTR3	FBXO38	0	P+K-	PK	0.02383	0.04475
5_148381197	rs1045942	G	A	0.535714	0.5	0.125	UTR3	SH3TC2	0	P+K-	PK	0.004296	0.03109
5_148407893	rs6875902	C	A	0.3125	0.205882	0	exonic	SH3TC2	nonsynonymous SNV	P+K-	PK	0.01123	0.06246
5_148408101	rs1432793	A	G	0.666667	0.5	0.222222	exonic	SH3TC2	synonymous SNV	P+K-	PK	0.02631	0.05851
5_148733364	rs168463	C	T	0.277778	0.205882	0.444444	ncRNA_intronic	GRPEL2-AS1	0	P-K+	PK	0.04339	0.07392
5_149599133	rs200391443	C	G	0.233333	0.0416667	0.416667	UTR3	CAMK2A	0	P-K+	PK	0.004387	0.0147
5_150561874	rs12654727	C	G	0.138889	0.0277778	0.222222	UTR3	CCDC69	0	P-K+	PK	0.02781	0.1065
5_150683055	rs6866481	G	A	0.388889	0.588235	0.21875	UTR5	SLC36A3	0	P+K-	PK	0.002879	0.05371
5_150696498	rs428064	G	A	0.361111	0.555556	0.277778	exonic	SLC36A2	synonymous SNV	P+K-	PK	0.03066	0.09353
5_151041150	rs3549	G	C	0.388889	0.222222	0.5	UTR3	SPARC	0	P-K+	PK	0.02631	0.07208
5_151041932	rs3210714	C	T	0.388889	0.205882	0.5	UTR3	SPARC	0	P-K+	PK	0.01321	0.05054
5_155753874	rs7724969	A	T	0.194444	0.138889	0.388889	UTR5	SGCD	0	P-K+	PK	0.03086	0.07949
5_157073747	rs12188040	G	T	0.138889	0.0277778	0.205882	exonic	SOX30	nonsynonymous SNV	P-K+	PK	0.02564	0.1071
5_157214434	rs12283	T	C	0.0277778	0.25	0.0555556	UTR3	CLINT1	0	P+K-	PK	0.0457	0.1514
5_169816300	rs703508	A	G	0.705882	0.805556	0.558824	UTR5	KCNMB1	0	P+K-	PK	0.03903	0.04661
5_175773287	rs409744	T	C	0.555556	0.638889	0.892857	UTR3	KIAA1191	0	P-K+	PK	0.02304	0.06248
5_176314459	rs2278492	G	A	0.388889	0.583333	0.323529	exonic	HK3	synonymous SNV	P+K-	PK	0.03408	0.0561
5_176378574	rs365132	G	T	0.527778	0.333333	0.617647	exonic	UIMC1	synonymous SNV	P-K+	PK	0.03038	0.06084
5_176639105	rs28932181	T	C	0.0277778	0	0.205882	exonic	NSD1	synonymous SNV	P-K+	PK	0.004488	0.05527
5_176730678	rs9313754	C	G	0.277778	0.352941	0.117647	UTR5	RAB24	0	P+K-	PK	0.04332	0.06021
5_177059130	rs6886539	T	G	0.333333	0.588235	0.266667	ncRNA_exonic	LOC202181	0	P+K-	PK	0.01243	0.07474
5_177659778	rs2913858	G	A	0.5	0.527778	0.764706	UTR5	PHYKPL	0	P-K+	PK	0.04833	0.05371
5_178340055	rs7724141	C	G	0.25	0.333333	0.0833333	UTR5	ZFP2	0	P+K-	PK	0.01824	0.0632
5_178391860	rs6867221	G	A	0.5	0.527778	0.25	exonic	ZNF454	nonsynonymous SNV	P+K-	PK	0.02873	0.08979
5_178391902	rs12719860	A	C	0.472222	0.441176	0.735294	exonic	ZNF454	nonsynonymous SNV	P-K+	PK	0.02577	0.06084
5_178507587	rs17666515	T	C	0.46875	0.28125	0.558824	UTR3	ZNF354C	0	P-K+	PK	0.02739	0.06968
5_178540975	rs1054480	G	A	0.416667	0.25	0.527778	exonic	ADAMTS2	nonsynonymous SNV	P-K+	PK	0.02873	0.1435
5_180276402	rs168726	C	T	0.882353	0.823529	0.555556	exonic	ZFP62	nonsynonymous SNV	P+K-	PK	0.02098	0.06054
5_180278393	rs705441	C	G	0.861111	0.875	0.617647	exonic	ZFP62	startloss	P+K-	PK	0.02406	0.06405
5_180622615	rs254460	C	T	0.361111	0.333333	0.09375	exonic	TRIM7	nonsynonymous SNV	P+K-	PK	0.02103	0.03444
6_486193	rs12952	G	A	0.583333	0.722222	0.416667	UTR3	EXOC2	0	P+K-	PK	0.01666	0.05611
6_962479	rs73386082	A	G	0.166667	0.0277778	0.222222	ncRNA_exonic	LINC01622	0	P-K+	PK	0.02781	0.0847
6_3270510	rs1127477	G	C	0.777778	0.75	0.944444	UTR3	SLC22A23	0	P-K+	PK	0.0457	0.0847
6_3270557	rs1127475	T	C	0.194444	0.166667	0	UTR3	SLC22A23	0	P+K-	PK	0.02493	0.1065
6_3270578	rs1127473	C	T	0.194444	0.166667	0	UTR3	SLC22A23	0	P+K-	PK	0.02493	0.1065
6_3270840	rs3813480	A	G	0.194444	0.166667	0	UTR3	SLC22A23	0	P+K-	PK	0.02493	0.1065
6_3270937	rs1127466	G	C	0.194444	0.166667	0	UTR3	SLC22A23	0	P+K-	PK	0.02493	0.1065
6_3271298	rs45629235	A	G	0.166667	0.166667	0	UTR3	SLC22A23	0	P+K-	PK	0.02511	0.08024
6_3271509	rs9501970	T	C	0.194444	0.166667	0	UTR3	SLC22A23	0	P+K-	PK	0.02493	0.1065
6_3271703	rs9503514	A	G	0.194444	0.166667	0	UTR3	SLC22A23	0	P+K-	PK	0.02493	0.1065
6_3272018	rs9503515	G	A	0.166667	0.176471	0	UTR3	SLC22A23	0	P+K-	PK	0.02457	0.08024
6_3272565	rs9501971	G	A	0.166667	0.166667	0	UTR3	SLC22A23	0	P+K-	PK	0.02493	0.1514
6_3272567	rs9501972	T	C	0.194444	0.166667	0	UTR3	SLC22A23	0	P+K-	PK	0.02493	0.1065
6_3272573	rs9501973	T	C	0.222222	0.166667	0	UTR3	SLC22A23	0	P+K-	PK	0.02493	0.0847
6_3272775	rs9501974	T	C	0.194444	0.166667	0	UTR3	SLC22A23	0	P+K-	PK	0.02493	0.1065
6_3272807	rs9501975	C	T	0.194444	0.166667	0	UTR3	SLC22A23	0	P+K-	PK	0.02493	0.1065
6_3273457	rs9503518	A	G	0.205882	0.194444	0	exonic	SLC22A23	synonymous SNV	P+K-	PK	0.01133	0.04263
6_4063681	rs853411	G	A	0.647059	0.75	0.4375	UTR3	PRPF4B	0	P+K-	PK	0.02115	0.04152
6_7881311	rs1044104	A	G	0.277778	0.166667	0.416667	UTR3	BMP6	0	P-K+	PK	0.0367	0.07208
6_15520778	rs13201824	G	T	0.0384615	0.142857	0	UTR3	JARID2	0	P+K-	PK	0.04199	0.08426
6_18399750	rs2296198	T	C	0.777778	0.666667	0.882353	UTR5	RNF144B	0	P-K+	PK	0.046	0.07517
6_24425609	rs3747772	T	A	0.117647	0	0.147059	UTR3	MRS2	0	P-K+	PK	0.02299	0.1065
6_24653376	rs1129644	G	A	0.611111	0.5625	0.805556	exonic	TDP2	synonymous SNV	P-K+	PK	0.03799	0.06021
6_29053998	rs7752270	G	A	0.0714286	0	0.142857	UTR3	OR2B3	0	P-K+	PK	0.04826	0.07216
6_29760605	rs1611214	G	T	0.192308	0.0769231	0.333333	ncRNA_exonic	HCG4	0	P-K+	PK	0.03459	0.0638
6_30257497	rs2285800	C	G	0.0625	0.2	0	ncRNA_exonic	HCG18	0	P+K-	PK	0.04329	0.04712
6_30460776	rs74295295	A	C	0	0.147059	0	UTR3	HLA-E	0	P+K-	PK	0.02299	0.05389
6_30692965	rs8233	G	A	0.0833333	0.264706	0.0555556	UTR3	TUBB	0	P+K-	PK	0.02186	0.08024
6_31106499	rs9263726	G	A	0	0.166667	0	exonic	PSORS1C1	nonsynonymous SNV	P+K-	PK	0.02493	0.1987
6_31110786	rs12364	T	A	0.0833333	0.25	0.0555556	exonic	CCHCR1	synonymous SNV	P+K-	PK	0.0457	0.1514
6_31116220	rs130070	G	A	0.0277778	0.166667	0	exonic	CCHCR1	synonymous SNV	P+K-	PK	0.02493	0.1145
6_31122330	rs130077	G	A	0.0277778	0.166667	0	exonic	CCHCR1	synonymous SNV	P+K-	PK	0.02493	0.1145
6_31126944	rs3094187	C	T	0.527778	0.352941	0.694444	UTR5	TCF19	0	P-K+	PK	0.007955	0.09619
6_31130821	rs1044870	C	T	0.0277778	0.166667	0	UTR3	TCF19	0	P+K-	PK	0.02493	0.1145
6_31145451	rs3130506	G	A	0.638889	0.5	0.794118	ncRNA_exonic	PSORS1C3	0	P-K+	PK	0.02142	0.04346
6_31170514	rs9263870	A	G	0.138889	0.305556	0.0833333	ncRNA_exonic	HCG27	0	P+K-	PK	0.03457	0.1113
6_31237858	rs34794906	T	C	0.416667	0.472222	0.194444	exonic	HLA-C	synonymous SNV	P+K-	PK	0.02344	0.1285
6_31238155	rs1050328	G	A	0.388889	0.444444	0.194444	exonic	HLA-C	nonsynonymous SNV	P+K-	PK	0.04198	0.1285
6_31321906	rs1093	A	G	0.111111	0.0294118	0.277778	UTR3	HLA-B	0	P-K+	PK	0.006585	0.0847
6_31322303	rs2308655	C	G	0.5	0.777778	0.472222	exonic	HLA-B	nonsynonymous SNV	P+K-	PK	0.01419	0.05611
6_31322980	rs1131500	C	T	0.527778	0.722222	0.444444	exonic	HLA-B	nonsynonymous SNV	P+K-	PK	0.03066	0.09353
6_31323337	rs1050341	T	C	0.333333	0.583333	0.305556	exonic	HLA-B	nonsynonymous SNV	P+K-	PK	0.03205	0.09619
6_31439846	rs3094603	G	A	0.05	0.214286	0.55	ncRNA_exonic	HCG26	0	P-K+	PK	0.03083	0.03215
6_31556656	rs3087617	A	T	0.1875	0.28125	0.0588235	UTR3	LST1	0	P+K-	PK	0.02099	0.06456
6_31632686	rs2295665	C	T	0.166667	0.235294	0.0555556	UTR5	GPANK1	0	P+K-	PK	0.04263	0.1113
6_31633689	rs16899941	C	T	0.194444	0.222222	0.0294118	UTR5	CSNK2B;GPANK1	0	P+K-	PK	0.02813	0.1113
6_31675765	rs2242653	G	A	0.194444	0.361111	0.0833333	exonic	LY6G6F	nonsynonymous SNV	P+K-	PK	0.009279	0.09423
6_31975716	rs201740698	C	T	0.0588235	0	0.3	exonic	CYP21A2	unknown	P-K+	PK	0.0005195	0.02106
6_32485397	rs112749594	G	A	0.0769231	0.05	0.409091	UTR3	HLA-DRB5	0	P-K+	PK	0.009837	0.01356
6_32485410	rs151002802	G	T	0.0769231	0.05	0.409091	UTR3	HLA-DRB5	0	P-K+	PK	0.009837	0.01356
6_32485440	.	A	G	0.0333333	0.0454545	0.35	UTR3	HLA-DRB5	0	P-K+	PK	0.01823	0.02484
6_32486437	rs1136905	T	C	0.192308	0.111111	0.458333	exonic	HLA-DRB5	nonsynonymous SNV	P-K+	PK	0.0208	0.02205
6_32546843	rs202053852	T	C	0.166667	0.0625	0.266667	UTR3	HLA-DRB1	0	P-K+	PK	0.03996	0.08848
6_32546863	rs34955866	G	T	0.125	0.0625	0.321429	UTR3	HLA-DRB1	0	P-K+	PK	0.01693	0.05757
6_32546879	rs35445101	A	G	0.176471	0.0666667	0.285714	exonic	HLA-DRB1	nonsynonymous SNV	P-K+	PK	0.03839	0.06294
6_32549344	rs111403823	T	C	0.115385	0	0.142857	exonic	HLA-DRB1	synonymous SNV	P-K+	PK	0.04826	0.06562
6_32549356	rs28732329	T	C	0.208333	0.0714286	0.392857	exonic	HLA-DRB1	synonymous SNV	P-K+	PK	0.009531	0.02858
6_32549357	rs200809587	G	A	0.166667	0.0714286	0.357143	exonic	HLA-DRB1	nonsynonymous SNV	P-K+	PK	0.02003	0.03398
6_32549361	rs111739605	C	T	0.142857	0.0666667	0.333333	exonic	HLA-DRB1	nonsynonymous SNV	P-K+	PK	0.02115	0.03316
6_32609236	rs4193	G	A	0.235294	0.147059	0.416667	exonic	HLA-DQA1	nonsynonymous SNV	P-K+	PK	0.01725	0.0367
6_32609253	rs9272702	G	A	0.125	0.125	0.366667	exonic	HLA-DQA1	synonymous SNV	P-K+	PK	0.03804	0.04117
6_32609254	rs1142331	G	T	0.125	0.125	0.366667	exonic	HLA-DQA1	nonsynonymous SNV	P-K+	PK	0.03804	0.04117
6_32609255	rs1142332	G	T	0.125	0.125	0.366667	exonic	HLA-DQA1	nonsynonymous SNV	P-K+	PK	0.03804	0.04117
6_32609271	rs1142334	G	C	0.125	0.117647	0.4	exonic	HLA-DQA1	nonsynonymous SNV	P-K+	PK	0.01893	0.03331
6_32609286	rs1048087	C	T	0.125	0.117647	0.428571	exonic	HLA-DQA1	synonymous SNV	P-K+	PK	0.008191	0.0327
6_32609312	rs1129808	A	C	0.178571	0.125	0.428571	exonic	HLA-DQA1	nonsynonymous SNV	P-K+	PK	0.009996	0.02749
6_32632744	rs1049082	C	T	0.222222	0.111111	0.361111	exonic	HLA-DQB1	synonymous SNV	P-K+	PK	0.02463	0.1073
6_32714783	rs9276440	A	T	0.527778	0.676471	0.888889	downstream	HLA-DQA2	0	P-K+	PK	0.04203	0.06021
6_32724061	rs9276558	A	G	0.583333	0.694444	0.916667	UTR3	HLA-DQB2	0	P-K+	PK	0.03457	0.06404
6_32904981	rs1042337	G	A	0.805556	0.694444	0.933333	exonic	HLA-DMB	nonsynonymous SNV	P-K+	PK	0.02706	0.04332
6_33032861	rs1042908	G	A	0.192308	0.1875	0	UTR3	HLA-DPA1	0	P+K-	PK	0.02808	0.02893
6_33032865	rs1042901	A	C	0.192308	0.21875	0	UTR3	HLA-DPA1	0	P+K-	PK	0.01601	0.02262
6_33638300	rs17526232	G	A	0.0555556	0.166667	0	exonic	ITPR3	synonymous SNV	P+K-	PK	0.02493	0.1145
6_35791302	rs9462125	G	C	0.392857	0.416667	0.115385	UTR3	LHFPL5	0	P+K-	PK	0.02355	0.03974
6_36709065	rs1065258	G	C	0.441176	0.4	0.142857	UTR3	CPNE5	0	P+K-	PK	0.04036	0.04999
6_38729511	rs61748600	T	C	0.0277778	0.166667	0	exonic	DNAH8	nonsynonymous SNV	P+K-	PK	0.02493	0.1145
6_39290200	rs3734619	C	T	0.333333	0.0833333	0.333333	exonic	KCNK16	synonymous SNV	P-K+	PK	0.01824	0.09423
6_40998141	rs736795	G	A	0.5	0.472222	0.222222	exonic	UNC5CL	synonymous SNV	P+K-	PK	0.04661	0.09353
6_41029342	rs2076472	T	C	0.416667	0.444444	0.194444	exonic	APOBEC2	nonsynonymous SNV	P+K-	PK	0.04198	0.08497
6_41034858	rs11280	T	C	0.416667	0.444444	0.194444	UTR3	OARD1	0	P+K-	PK	0.04198	0.08497
6_41089681	rs722442	A	G	0.527778	0.588235	0.222222	ncRNA_exonic	ADCY10P1	0	P+K-	PK	0.003105	0.05851
6_41621618	rs1056684	A	G	0.722222	0.972222	0.71875	UTR3	MDFI	0	P+K-	PK	0.004569	0.05943
6_41621625	rs1056686	G	A	0.722222	0.972222	0.71875	UTR3	MDFI	0	P+K-	PK	0.004569	0.05943
6_43596814	rs112851070	C	G	0	0	0.176471	exonic	GTPBP2	nonsynonymous SNV	P-K+	PK	0.01026	0.05548
6_43904780	rs11755845	C	T	0.194444	0.222222	0.0277778	ncRNA_exonic	LINC01512	0	P+K-	PK	0.02781	0.1514
6_43904901	rs1886979	G	A	0.472222	0.555556	0.277778	ncRNA_exonic	LINC01512	0	P+K-	PK	0.03066	0.09353
6_43905506	rs9381267	G	C	0.5	0.555556	0.25	ncRNA_exonic	LINC01512	0	P+K-	PK	0.01558	0.08497
6_43970658	rs115402675	T	A	0.0294118	0	0.125	exonic	C6orf223	nonsynonymous SNV	P-K+	PK	0.04416	0.1142
6_45866682	rs1128514	T	C	0.1875	0.205882	0	UTR3	CLIC5	0	P+K-	PK	0.01123	0.08159
6_45869226	rs9969070	A	G	0.138889	0.222222	0.0277778	UTR3	CLIC5	0	P+K-	PK	0.02781	0.1514
6_45870148	rs2297834	G	A	0.138889	0.222222	0	UTR3	CLIC5	0	P+K-	PK	0.005056	0.1514
6_50813030	rs73427175	G	T	0.0625	0.09375	0.384615	UTR3	TFAP2B	0	P-K+	PK	0.01164	0.04332
6_52269547	rs3180067	A	G	0.166667	0.25	0.0555556	UTR3	PAQR8	0	P+K-	PK	0.0457	0.1113
6_52529358	rs1355775	G	A	0.5	0.611111	0.875	ncRNA_exonic	LOC730101	0	P-K+	PK	0.026	0.03444
6_52529714	rs2670123	C	G	0.555556	0.638889	0.888889	ncRNA_exonic	LOC730101	0	P-K+	PK	0.02463	0.07208
6_52529773	rs2670124	C	G	0.527778	0.638889	0.888889	ncRNA_exonic	LOC730101	0	P-K+	PK	0.02463	0.07208
6_52533551	rs1043937	T	C	0.533333	0.5	0.892857	ncRNA_exonic	LOC730101	0	P-K+	PK	0.002989	0.02783
6_53519605	rs3799260	C	T	0.916667	1	0.823529	exonic	KLHL31	nonsynonymous SNV	P+K-	PK	0.02457	0.1071
6_62442604	rs10484690	A	G	0.333333	0.111111	0.5	exonic	KHDRBS2	synonymous SNV	P-K+	PK	0.0005424	0.03903
6_70385709	rs9185	G	A	0.53125	0.366667	0.730769	UTR3	LMBRD1	0	P-K+	PK	0.008202	0.05922
6_74155346	rs610913	G	T	0.6	0.5	0.777778	exonic	MB21D1	nonsynonymous SNV	P-K+	PK	0.02276	0.03778
6_74226318	rs1390082	T	A	0.733333	0.588235	0.857143	UTR3	EEF1A1	0	P-K+	PK	0.02596	0.0327
6_74226353	rs11755449	C	T	0.0882353	0.323529	0.0833333	UTR3	EEF1A1	0	P+K-	PK	0.0166	0.06405
6_80196498	rs2292109	T	C	0.5	0.470588	0.21875	UTR3	LCA5	0	P+K-	PK	0.04073	0.05054
6_80411572	rs1507	C	A	0.205882	0.333333	0.0882353	UTR3	SH3BGRL2	0	P+K-	PK	0.01867	0.08065
6_86205323	rs6922	T	G	0.777778	0.538462	0.875	UTR3	NT5E	0	P-K+	PK	0.01357	0.01883
6_90638963	rs1055403	G	A	0.305556	0.138889	0.444444	UTR3	BACH2	0	P-K+	PK	0.008624	0.07208
6_90660319	rs9451298	T	C	0.333333	0.277778	0.555556	exonic	BACH2	synonymous SNV	P-K+	PK	0.03066	0.08497
6_90661576	rs2236181	T	C	0.392857	0.21875	0.653846	exonic	BACH2	synonymous SNV	P-K+	PK	0.001232	0.05054
6_93950566	rs10806473	C	T	0.176471	0.21875	0.0294118	UTR3	EPHA7	0	P+K-	PK	0.02492	0.04137
6_96057006	rs9387562	G	T	0.833333	0.71875	0.928571	UTR3	MANEA	0	P-K+	PK	0.04787	0.09255
6_97337537	rs7758762	C	T	0.194444	0.222222	0.472222	UTR3	NDUFAF4	0	P-K+	PK	0.04661	0.055
6_97338679	rs1854268	A	T	0.194444	0.222222	0.5	UTR3	NDUFAF4	0	P-K+	PK	0.02415	0.04346
6_99883226	rs17180915	T	C	0.1	0.0588235	0.307692	UTR3	USP45	0	P-K+	PK	0.01484	0.03634
6_101296389	rs9390698	G	A	0.194444	0.147059	0.411765	exonic	ASCC3	nonsynonymous SNV	P-K+	PK	0.02912	0.06054
6_106556493	rs41292414	A	G	0.0357143	0	0.181818	UTR3	PRDM1	0	P-K+	PK	0.03176	0.0816
6_106967778	rs3747787	T	C	0.235294	0.277778	0.0294118	exonic	CRYBG1	nonsynonymous SNV	P+K-	PK	0.006585	0.05943
6_106999822	rs2297970	G	A	0.323529	0.264706	0.558824	exonic	CRYBG1	nonsynonymous SNV	P-K+	PK	0.02577	0.0702
6_109295040	rs3734651	T	C	0.115385	0.0714286	0.321429	UTR3	ARMC2	0	P-K+	PK	0.04029	0.04271
6_109629420	rs11153168	A	T	0.194444	0.333333	0.0555556	ncRNA_exonic	CCDC162P	0	P+K-	PK	0.00586	0.07949
6_112382313	rs1230345	G	T	0.117647	0.277778	0.0588235	exonic	WISP3	nonsynonymous SNV	P+K-	PK	0.02423	0.032
6_112422664	rs2010314	A	C	0.09375	0.235294	0.0333333	UTR3	FAM229B	0	P+K-	PK	0.02943	0.03315
6_112430180	rs12208872	A	G	0.0882353	0.264706	0.03125	UTR3	LAMA4	0	P+K-	PK	0.0134	0.02492
6_112435912	rs1050353	A	T	0.125	0.25	0	exonic	LAMA4	synonymous SNV	P+K-	PK	0.00248	0.03772
6_112671611	rs11153361	G	A	0.333333	0.333333	0.111111	exonic	RFPL4B	nonsynonymous SNV	P+K-	PK	0.0451	0.1073
6_112672155	rs11153362	C	A	0.333333	0.352941	0.111111	UTR3	RFPL4B	0	P+K-	PK	0.02259	0.1073
6_114225811	rs352099	A	G	0.666667	0.909091	0.576923	ncRNA_exonic	FLJ34503	0	P+K-	PK	0.0204	0.02402
6_116600810	rs3828743	G	A	0.333333	0.583333	0.323529	exonic	TSPYL1	nonsynonymous SNV	P+K-	PK	0.03408	0.05026
6_123317677	rs6937361	A	G	0.558824	0.59375	0.264706	UTR5	CLVS2	0	P+K-	PK	0.01214	0.05367
6_125596957	rs1040803	C	T	0.423077	0.8	0.454545	UTR3	HDDC2	0	P+K-	PK	0.01733	0.02258
6_128040839	rs675531	T	C	0.433333	0.65625	0.333333	exonic	THEMIS	nonsynonymous SNV	P+K-	PK	0.02143	0.06921
6_130465549	rs1055374	A	G	0.15625	0.0555556	0.235294	UTR3	SAMD3	0	P-K+	PK	0.04263	0.05757
6_131148382	rs9402288	A	T	0.527778	0.264706	0.617647	upstream	SMLR1	0	P-K+	PK	0.006753	0.0541
6_131148486	rs9402289	C	T	0.5	0.25	0.638889	upstream	SMLR1	0	P-K+	PK	0.00183	0.05487
6_131148737	rs1044303	G	A	0.470588	0.25	0.666667	exonic	SMLR1	nonsynonymous SNV	P-K+	PK	0.0008003	0.05487
6_131156102	rs6975	G	T	0.416667	0.138889	0.555556	UTR3	SMLR1	0	P-K+	PK	0.0004077	0.05611
6_131161504	rs1043596	T	C	0.555556	0.264706	0.558824	UTR3	EPB41L2	0	P-K+	PK	0.02577	0.05617
6_131190838	rs17059736	G	A	0.138889	0.0277778	0.25	exonic	EPB41L2	synonymous SNV	P-K+	PK	0.01359	0.1065
6_136589448	rs78267720	C	A	0.166667	0.25	0.0625	exonic	BCLAF1	nonsynonymous SNV	P+K-	PK	0.04928	0.08406
6_136663948	rs1681	A	C	0.875	0.941176	0.676471	UTR3	MAP7	0	P+K-	PK	0.01148	0.03465
6_139364355	rs11544429	G	A	0.0625	0.2	0.03125	UTR3	ABRACL	0	P+K-	PK	0.04962	0.1049
6_139693834	rs1131431	G	A	0.138889	0.25	0.0555556	UTR3	CITED2	0	P+K-	PK	0.0457	0.1113
6_144269541	rs2076684	G	C	0.222222	0.0833333	0.305556	UTR5	PLAGL1	0	P-K+	PK	0.03457	0.0632
6_144869785	rs1534443	A	G	0.333333	0.323529	0.0416667	exonic	UTRN	nonsynonymous SNV	P+K-	PK	0.009646	0.03989
6_145051594	rs4305737	G	A	0.5	0.617647	0.294118	exonic	UTRN	synonymous SNV	P+K-	PK	0.01428	0.0541
6_150114745	rs4816	G	A	0.5	0.558824	0.294118	exonic	PCMT1	nonsynonymous SNV	P+K-	PK	0.04896	0.08785
6_150724853	rs3734737	T	C	0.138889	0.305556	0.0833333	UTR3	IYD	0	P+K-	PK	0.03457	0.0632
6_151712598	rs79626929	T	G	0.0909091	0	0.214286	UTR5	ZBTB2	0	P-K+	PK	0.02512	0.0706
6_152647681	rs2306916	A	T	0.638889	0.75	0.472222	exonic	SYNE1	nonsynonymous SNV	P+K-	PK	0.02873	0.08497
6_152652034	rs6911096	A	T	0.638889	0.75	0.441176	exonic	SYNE1	nonsynonymous SNV	P+K-	PK	0.0141	0.07907
6_153043035	rs17710008	G	A	0.111111	0.222222	0.0294118	exonic	MYCT1	nonsynonymous SNV	P+K-	PK	0.02813	0.08024
6_158930293	rs12207498	A	T	0.617647	0.766667	0.5	UTR3	TULP4	0	P+K-	PK	0.03778	0.06839
6_159187355	rs1057038	A	T	0.382353	0.323529	0.65625	UTR3	EZR	0	P-K+	PK	0.01313	0.0455
6_160113872	rs4880	A	G	0.527778	0.416667	0.694444	exonic	SOD2	nonsynonymous SNV	P-K+	PK	0.03205	0.09353
6_160514541	rs1888727	T	C	0.416667	0.555556	0.25	ncRNA_exonic	LOC729603	0	P+K-	PK	0.01558	0.09353
6_168197527	rs853836	G	C	0.75	0.454545	0.846154	ncRNA_exonic	LINC01558	0	P-K+	PK	0.005976	0.03366
6_168315978	rs3213590	G	C	0.361111	0.277778	0.0555556	exonic	AFDN	synonymous SNV	P+K-	PK	0.02383	0.09423
6_168317816	rs6906754	A	C	0.333333	0.25	0.0555556	exonic	AFDN	synonymous SNV	P+K-	PK	0.0457	0.07949
6_168349011	rs9364371	C	T	0.222222	0.194444	0.444444	exonic	AFDN	synonymous SNV	P-K+	PK	0.04198	0.1187
6_168364149	rs3734882	A	G	0.305556	0.264706	0.0555556	UTR3	AFDN	0	P+K-	PK	0.02186	0.07949
6_168371755	rs1044292	G	A	0.25	0.25	0.0555556	UTR3	AFDN	0	P+K-	PK	0.03772	0.06942
7_2611878	rs2917751	T	C	0.611111	0.666667	0.888889	exonic	IQCE	synonymous SNV	P-K+	PK	0.0451	0.09423
7_2649932	rs3735111	T	G	0.277778	0.361111	0.0882353	UTR3	IQCE	0	P+K-	PK	0.009567	0.06021
7_6013153	rs10000	A	G	0.142857	0.3	0	exonic	PMS2	synonymous SNV	P+K-	PK	0.005491	0.07206
7_6062229	rs3801030	T	C	0.166667	0.0277778	0.222222	UTR3	EIF2AK1	0	P-K+	PK	0.02781	0.1065
7_6185194	rs10225119	A	G	0.0555556	0.166667	0	exonic	USP42	synonymous SNV	P+K-	PK	0.02511	0.05414
7_6639953	rs34300529	G	A	0.0277778	0.166667	0	exonic	C7orf26	synonymous SNV	P+K-	PK	0.02493	0.1145
7_6728859	rs35825898	A	G	0.125	0.25	0	UTR3	ZNF12	0	P+K-	PK	0.0104	0.02811
7_6746098	rs13239758	C	A	0.111111	0.277778	0	UTR5	ZNF12	0	P+K-	PK	0.0009713	0.0847
7_6776956	rs7804542	A	G	0.277778	0.444444	0.138889	ncRNA_exonic	PMS2CL	0	P+K-	PK	0.008624	0.1073
7_6777369	rs35291651	T	C	0.25	0.441176	0.117647	ncRNA_exonic	PMS2CL	0	P+K-	PK	0.006006	0.06554
7_6790900	rs200453156	T	C	0.272727	0.357143	0.0833333	ncRNA_exonic	PMS2CL	0	P+K-	PK	0.02414	0.03015
7_6844574	rs75680229	C	G	0.423077	0.136364	0.461538	exonic	CCZ1B	nonsynonymous SNV	P-K+	PK	0.02734	0.03072
7_12410112	rs963323	G	A	0.75	0.705882	0.941176	exonic	VWDE	nonsynonymous SNV	P-K+	PK	0.02303	0.05943
7_16793504	rs6975847	A	G	0.166667	0.294118	0	UTR5	TSPAN13	0	P+K-	PK	0.000902	0.05752
7_16816000	rs2290837	T	C	0.176471	0.305556	0.0714286	exonic	TSPAN13	synonymous SNV	P+K-	PK	0.02838	0.06859
7_20699922	rs6967746	T	G	0.366667	0.0588235	0.333333	UTR3	ABCB5	0	P-K+	PK	0.008504	0.06992
7_21778449	rs1109806	C	T	0.527778	0.5	0.764706	exonic	DNAH11	synonymous SNV	P-K+	PK	0.02755	0.05371
7_21893993	rs4722064	G	T	0.230769	0.176471	0.558824	exonic	DNAH11	nonsynonymous SNV	P-K+	PK	0.002214	0.03103
7_36764123	rs3807605	T	C	0.142857	0.0555556	0.323529	UTR5	AOAH	0	P-K+	PK	0.005178	0.06246
7_38423694	rs75986987	A	T	0.0277778	0.0555556	0.305556	UTR3	AMPH	0	P-K+	PK	0.01201	0.1065
7_43506059	rs2304329	A	G	0.722222	0.833333	0.527778	exonic	HECW1	synonymous SNV	P+K-	PK	0.01065	0.06404
7_43916138	rs1468405	C	G	0.75	0.638889	0.916667	UTR3	URGCP	0	P-K+	PK	0.009279	0.1552
7_43917274	rs2232103	A	G	0.722222	0.611111	0.90625	exonic	URGCP	synonymous SNV	P-K+	PK	0.00569	0.1022
7_43981034	rs2527811	A	C	0.638889	0.388889	0.694444	ncRNA_exonic	POLR2J4	0	P-K+	PK	0.01739	0.08979
7_43982341	rs2074728	G	C	0.423077	0.166667	0.633333	ncRNA_exonic	POLR2J4	0	P-K+	PK	0.0004809	0.03454
7_43983812	rs10280249	T	C	0.571429	0.357143	0.791667	ncRNA_exonic	POLR2J4	0	P-K+	PK	0.002217	0.03203
7_43984037	rs2527812	A	G	0.722222	0.611111	0.861111	ncRNA_exonic	POLR2J4	0	P-K+	PK	0.03086	0.1877
7_45197433	rs67477213	G	A	0.125	0.0588235	0.264706	exonic	RAMP3	synonymous SNV	P-K+	PK	0.04458	0.08323
7_48965427	rs145470654	A	G	0.5	0.647059	0.361111	ncRNA_exonic	CDC14C	0	P+K-	PK	0.03065	0.08758
7_62753079	rs201311223	A	G	0.318182	0.5	0	ncRNA_exonic	ZNF733P	0	P+K-	PK	0.0003153	0.01303
7_64601653	.	C	T	0	0	0.178571	ncRNA_exonic	INTS4P1	0	P-K+	PK	0.02145	0.1129
7_75864463	rs6966223	T	G	0.0588235	0	0.166667	exonic	SRRM3	nonsynonymous SNV	P-K+	PK	0.02202	0.05819
7_75958110	rs147277079	A	G	0.0294118	0	0.15625	UTR3	YWHAG	0	P-K+	PK	0.01932	0.05813
7_76682183	rs200924454	C	T	0.0294118	0	0.166667	ncRNA_exonic	PMS2P9	0	P-K+	PK	0.01869	0.1136
7_88964000	rs801839	C	T	0.441176	0.617647	0.323529	exonic	ZNF804B	synonymous SNV	P+K-	PK	0.02803	0.05367
7_88964061	rs80006813	A	C	0.111111	0.235294	0.0555556	exonic	ZNF804B	nonsynonymous SNV	P+K-	PK	0.04263	0.05527
7_88964196	rs801840	T	A	0.466667	0.676471	0.28125	exonic	ZNF804B	nonsynonymous SNV	P+K-	PK	0.00161	0.04662
7_88965150	rs74564278	A	G	0.0833333	0.235294	0.0357143	exonic	ZNF804B	nonsynonymous SNV	P+K-	PK	0.03319	0.05314
7_89854446	rs194520	T	G	0.333333	0.416667	0.166667	exonic	STEAP2	nonsynonymous SNV	P+K-	PK	0.0367	0.07907
7_90836643	rs12538034	C	T	0.194444	0.0882353	0.305556	UTR3	CDK14	0	P-K+	PK	0.0352	0.07949
7_90896831	rs3750145	T	C	0.111111	0.25	0.0555556	UTR3	FZD1	0	P+K-	PK	0.0457	0.1514
7_99488940	rs1048705	A	T	0.384615	0.818182	0.333333	UTR3	TRIM4	0	P+K-	PK	0.001211	0.02163
7_99489005	rs2572009	A	G	0.583333	0.764706	0.5	UTR3	TRIM4	0	P+K-	PK	0.04319	0.07464
7_100389590	rs76325149	C	T	0.111111	0.0277778	0.222222	exonic	ZAN	unknown	P-K+	PK	0.02781	0.1065
7_100410597	rs2230585	G	A	0.305556	0.361111	0.0833333	exonic	EPHB4	synonymous SNV	P+K-	PK	0.009279	0.06404
7_100804542	rs3177697	T	G	0.46875	0.28125	0.714286	UTR3	AP1S1	0	P-K+	PK	0.001652	0.03789
7_102417753	rs201667800	T	G	0.0588235	0	0.1875	exonic	FAM185A	nonsynonymous SNV	P-K+	PK	0.0244	0.1061
7_103848413	rs2075218	G	C	0.333333	0.472222	0.235294	UTR5	ORC5	0	P+K-	PK	0.04833	0.06797
7_105245754	rs12535264	A	G	0.0294118	0	0.21875	UTR3	ATXN7L1	0	P-K+	PK	0.004322	0.1084
7_105245877	rs17150293	G	A	0.0277778	0	0.1875	UTR3	ATXN7L1	0	P-K+	PK	0.009974	0.1139
7_105890298	rs1065322	A	C	0.676471	0.40625	0.807692	UTR3	NAMPT	0	P-K+	PK	0.003012	0.03072
7_107559722	rs8721	A	T	0.0882353	0.294118	0.0625	UTR3	DLD	0	P+K-	PK	0.02347	0.02753
7_114658194	.	G	T	0	0	0.1875	UTR3	MDFIC	0	P-K+	PK	0.009974	0.05819
7_115578441	rs17241584	T	C	0	0.214286	0	UTR3	TFEC	0	P+K-	PK	0.0235	0.07164
7_116147537	rs10249656	C	T	0.0909091	0.333333	0.05	UTR3	CAV2	0	P+K-	PK	0.02709	0.05185
7_116147908	rs4727833	C	G	0.583333	0.361111	0.647059	UTR3	CAV2	0	P-K+	PK	0.03065	0.06084
7_117832873	rs76402446	G	A	0	0.125	0	UTR3	LSM8	0	P+K-	PK	0.04416	0.1875
7_120936006	rs10241888	G	A	0.441176	0.2	0.46875	UTR3	CPED1	0	P-K+	PK	0.03333	0.06743
7_123269118	rs4731112	G	C	0.833333	0.823529	0.583333	exonic	ASB15	nonsynonymous SNV	P+K-	PK	0.03783	0.08065
7_128355458	rs3807127	A	G	0.0294118	0.176471	0	UTR5	FAM71F1	0	P+K-	PK	0.01026	0.1139
7_128371298	rs339065	C	T	0.222222	0.25	0.0555556	UTR3	FAM71F1	0	P+K-	PK	0.0457	0.0847
7_128409580	rs11653	T	A	0.333333	0.333333	0.0882353	UTR3	CALU	0	P+K-	PK	0.01867	0.04203
7_130629493	rs2293748	T	C	0.566667	0.71875	0.333333	ncRNA_exonic	LINC-PINT	0	P+K-	PK	0.004683	0.03149
7_131812556	rs35071694	T	G	0.107143	0.0384615	0.28125	UTR3	PLXNA4	0	P-K+	PK	0.01723	0.03661
7_138729795	rs10271373	A	C	0.264706	0.205882	0.5	UTR3	ZC3HAV1	0	P-K+	PK	0.01828	0.05863
7_138730025	rs1044551	T	C	0.305556	0.25	0.527778	UTR3	ZC3HAV1	0	P-K+	PK	0.02873	0.08979
7_138731398	rs1047129	T	C	0.235294	0.25	0.5	UTR3	ZC3HAV1	0	P-K+	PK	0.04722	0.05258
7_139026152	rs10265	T	G	0.194444	0.444444	0.194444	exonic	C7orf55-LUC7L2;FMC1	nonsynonymous SNV	P+K-	PK	0.04198	0.1073
7_139107739	rs9683	T	A	0.166667	0.444444	0.166667	ncRNA_intronic	LOC100129148	0	P+K-	PK	0.02018	0.1073
7_147674978	rs10240503	A	G	0.222222	0.0833333	0.333333	exonic	CNTNAP2	synonymous SNV	P-K+	PK	0.01824	0.09423
7_149519184	rs1008336	C	T	0.142857	0.3	0	exonic	SSPO	nonsynonymous SNV	P+K-	PK	0.007389	0.02419
7_149944478	rs143773661	C	T	0.176471	0	0.166667	UTR3	ACTR3C	0	P-K+	PK	0.02493	0.02813
7_151097314	rs61741447	A	G	0.0277778	0.166667	0	exonic	WDR86	synonymous SNV	P+K-	PK	0.02493	0.1145
7_154795411	rs112651172	C	G	0	0	0.166667	ncRNA_exonic	PAXIP1-AS1	0	P-K+	PK	0.03925	0.167
8_182183	rs146053243	C	T	0.125	0	0.266667	ncRNA_exonic	RPL23AP53	0	P-K+	PK	0.001731	0.05294
8_1731855	rs10089616	C	T	0.277778	0.388889	0.138889	UTR3	CLN8	0	P+K-	PK	0.03086	0.1073
8_7154917	rs62488791	A	C	0.294118	0.416667	0.138889	intergenic	LINC00965;FAM66B	0	P+K-	PK	0.01664	0.03783
8_8088411	rs201259751	A	G	0.181818	0	0.346154	ncRNA_exonic	FAM86B3P	0	P-K+	PK	0.0002934	0.01606
8_8096381	rs139376573	G	T	0.0714286	0	0.269231	ncRNA_exonic	FAM86B3P	0	P-K+	PK	0.002188	0.1049
8_8869199	rs9650616	T	G	0.194444	0.323529	0.0882353	exonic	ERI1	synonymous SNV	P+K-	PK	0.03331	0.06151
8_8890041	rs1045527	A	G	0.0294118	0.294118	0.0625	UTR3	ERI1	0	P+K-	PK	0.02347	0.05489
8_10396054	rs6601483	A	C	0.722222	0.583333	0.833333	exonic	PRSS55	synonymous SNV	P-K+	PK	0.0367	0.07208
8_10464206	rs12542075	G	A	0.472222	0.222222	0.472222	UTR3	RP1L1	0	P-K+	PK	0.04661	0.1368
8_10465771	rs11785822	G	T	0.916667	0.777778	0.972222	exonic	RP1L1	nonsynonymous SNV	P-K+	PK	0.02781	0.05527
8_10467160	rs62490855	G	A	0.444444	0.222222	0.472222	exonic	RP1L1	nonsynonymous SNV	P-K+	PK	0.04661	0.08979
8_10469817	rs6996950	G	A	0.861111	0.666667	0.888889	exonic	RP1L1	synonymous SNV	P-K+	PK	0.0451	0.1348
8_11184390	rs13266233	A	C	0.357143	0.269231	0.6875	UTR3	MTMR9	0	P-K+	PK	0.01137	0.01865
8_11292542	rs2280803	C	T	0.444444	0.444444	0.777778	ncRNA_exonic	FAM167A-AS1	0	P-K+	PK	0.007305	0.05771
8_11561728	rs61277615	C	T	0.138889	0.305556	0.0555556	UTR5	GATA4	0	P+K-	PK	0.01201	0.0847
8_11973746	rs376560073	G	C	0.0666667	0.166667	0	ncRNA_exonic	FAM66D	0	P+K-	PK	0.04614	0.06968
8_12870139	rs12156247	G	C	0.382353	0.194444	0.46875	UTR5	KIAA1456	0	P-K+	PK	0.02055	0.04509
8_12880105	rs472347	A	C	0.611111	0.764706	0.527778	UTR3	KIAA1456	0	P+K-	PK	0.04833	0.05026
8_12880277	rs1829422	G	C	0.458333	0.769231	0.375	UTR3	KIAA1456	0	P+K-	PK	0.009168	0.02163
8_12880289	rs112347397	C	T	0.0357143	0	0.2	UTR3	KIAA1456	0	P-K+	PK	0.02969	0.04965
8_17503270	rs1043885	G	C	0.916667	0.833333	1	UTR3	MTUS1	0	P-K+	PK	0.02511	0.1071
8_18388177	rs3758144	T	G	0.470588	0.470588	0.766667	UTR3	PSD3	0	P-K+	PK	0.02129	0.03991
8_18388211	rs200827572	C	T	0.194444	0.09375	0.323529	UTR3	PSD3	0	P-K+	PK	0.03401	0.132
8_18388216	rs369852398	C	T	0.138889	0.0294118	0.21875	UTR3	PSD3	0	P-K+	PK	0.02492	0.1061
8_20106380	rs732338	C	A	0.625	0.366667	0.821429	UTR3	LZTS1	0	P-K+	PK	0.0005539	0.03753
8_22477585	rs1869	C	T	0.352941	0.411765	0.166667	UTR3	CCAR2	0	P+K-	PK	0.034	0.06054
8_22880162	rs1047275	G	C	0.416667	0.527778	0.222222	UTR3	TNFRSF10B	0	P+K-	PK	0.01419	0.08979
8_23001988	rs1133782	A	G	0.861111	0.611111	0.888889	exonic	TNFRSF10D	nonsynonymous SNV	P-K+	PK	0.01295	0.09423
8_24261526	rs3765124	A	G	0.555556	0.441176	0.194444	exonic	ADAMDEC1	nonsynonymous SNV	P+K-	PK	0.03903	0.0561
8_27277537	rs1030526	G	A	0.444444	0.555556	0.805556	exonic	PTK2B	synonymous SNV	P-K+	PK	0.04198	0.08497
8_27293865	rs7005936	C	T	0.277778	0.444444	0.722222	exonic	PTK2B	synonymous SNV	P-K+	PK	0.03066	0.05611
8_27316117	rs2271920	G	A	0.277778	0.444444	0.75	UTR3	PTK2B	0	P-K+	PK	0.01558	0.05771
8_27317445	rs1057137	G	T	0.277778	0.444444	0.75	UTR3	CHRNA2	0	P-K+	PK	0.01558	0.05771
8_27324822	rs891398	T	C	0.527778	0.444444	0.138889	exonic	CHRNA2	nonsynonymous SNV	P+K-	PK	0.008624	0.07907
8_28909523	rs10088428	C	T	0.21875	0.264706	0.0333333	UTR3	HMBOX1	0	P+K-	PK	0.01466	0.01882
8_28924858	rs2693	C	T	0.555556	0.558824	0.222222	UTR3	KIF13B	0	P+K-	PK	0.006469	0.03408
8_38369831	rs4733951	A	C	0.607143	0.433333	0.75	UTR3	C8orf86	0	P-K+	PK	0.01816	0.05167
8_39172993	rs4073880	G	A	0.638889	0.5	0.805556	ncRNA_exonic	ADAM5	0	P-K+	PK	0.01253	0.04661
8_39370135	rs58628520	T	C	0.357143	0.366667	0.0666667	ncRNA_exonic	ADAM3A	0	P+K-	PK	0.01025	0.02037
8_42026968	rs34361836	A	T	0.138889	0.264706	0.0588235	UTR3	AP3M2	0	P+K-	PK	0.04458	0.08543
8_42036577	rs1136159	A	G	0.166667	0.305556	0.0882353	exonic	PLAT	synonymous SNV	P+K-	PK	0.0352	0.1062
8_54163562	rs1051660	C	A	0.176471	0.111111	0.333333	exonic	OPRK1	synonymous SNV	P-K+	PK	0.03664	0.04425
8_57871462	rs1044731	G	A	0.0555556	0.0294118	0.235294	UTR3	IMPAD1	0	P-K+	PK	0.02718	0.08024
8_57875588	rs10003	G	A	0.0555556	0.0277778	0.205882	UTR3	IMPAD1	0	P-K+	PK	0.02564	0.1065
8_67380863	rs1108	T	C	0.571429	0.5	0.136364	UTR3	ADHFE1	0	P+K-	PK	0.01219	0.01877
8_69143589	rs2280637	A	G	0.5	0.115385	0.45	exonic	PREX2	synonymous SNV	P-K+	PK	0.0171	0.03235
8_72934032	rs7827617	A	G	0.235294	0.111111	0.352941	ncRNA_intronic	MSC-AS1	0	P-K+	PK	0.02259	0.05388
8_74236370	rs4738320	G	A	0.90625	0.970588	0.7	ncRNA_intronic	RDH10-AS1	0	P+K-	PK	0.004275	0.02492
8_74461916	rs1132134	C	T	0.0294118	0	0.166667	UTR3	STAU2	0	P-K+	PK	0.02202	0.05819
8_81880096	rs11743	A	G	0.178571	0.0588235	0.423077	UTR3	PAG1	0	P-K+	PK	0.001084	0.03839
8_81905533	rs895267	G	A	0.411765	0.464286	0.166667	UTR5	PAG1	0	P+K-	PK	0.02255	0.06344
8_94936532	rs911	G	C	0.588235	0.588235	0.28125	UTR3	PDP1	0	P+K-	PK	0.01465	0.05367
8_104411282	rs1061195	T	C	0.0833333	0.264706	0.0666667	UTR3	SLC25A32	0	P+K-	PK	0.0486	0.0544
8_104412388	rs2241777	C	A	0.25	0.583333	0.222222	UTR3	SLC25A32	0	P+K-	PK	0.00358	0.05054
8_114186003	rs2219898	T	C	0.5	0.138889	0.4375	exonic	CSMD3	nonsynonymous SNV	P-K+	PK	0.007654	0.04319
8_117786603	rs3088140	T	C	0.138889	0.0294118	0.277778	UTR3	UTP23	0	P-K+	PK	0.006585	0.0457
8_124138855	rs16898012	G	A	0.388889	0.441176	0.176471	exonic	TBC1D31	synonymous SNV	P+K-	PK	0.03444	0.1134
8_124142489	rs2272724	T	C	0.352941	0.472222	0.147059	exonic	TBC1D31	synonymous SNV	P+K-	PK	0.004534	0.07474
8_124693444	rs3739283	C	T	0.833333	0.611111	0.861111	UTR3	ANXA13	0	P-K+	PK	0.03086	0.09423
8_131922027	rs12545028	T	G	0.166667	0.25	0.0555556	exonic	ADCY8	synonymous SNV	P+K-	PK	0.0457	0.1514
8_133024838	rs1051257	A	T	0.966667	0.875	0.538462	UTR3	EFR3A	0	P+K-	PK	0.007159	0.03661
8_133722669	rs2280871	C	T	0.03125	0.294118	0.0555556	UTR3	TMEM71	0	P+K-	PK	0.01082	0.08323
8_133858712	rs4736611	G	A	0.5625	0.375	0.714286	UTR3	PHF20L1	0	P-K+	PK	0.01073	0.04202
8_133859877	rs10079	G	T	0.607143	0.176471	0.769231	UTR3	PHF20L1	0	P-K+	PK	5.332e-06	0.0191
8_133860910	rs2049883	G	C	0.617647	0.361111	0.75	UTR3	PHF20L1	0	P-K+	PK	0.00183	0.05886
8_133860996	rs200187079	C	G	0.46875	0.375	0.6875	UTR3	PHF20L1	0	P-K+	PK	0.02341	0.04448
8_139647262	rs10091563	A	G	0.705882	0.555556	0.833333	exonic	COL22A1	synonymous SNV	P-K+	PK	0.02018	0.06797
8_141467840	rs2948172	T	G	0.625	0.7	0.357143	UTR5	TRAPPC9	0	P+K-	PK	0.01701	0.02819
8_141526231	rs4961323	C	T	0.75	0.75	0.363636	UTR3	CHRAC1	0	P+K-	PK	0.01632	0.03948
8_142225990	rs2288998	G	A	0.25	0.333333	0.0833333	exonic	SLC45A4	synonymous SNV	P+K-	PK	0.01824	0.07949
8_143954866	rs61752805	C	G	0.0555556	0.166667	0	UTR3	CYP11B1	0	P+K-	PK	0.02493	0.1145
8_144917790	rs11774027	A	G	0.611111	0.805556	0.555556	UTR3	NRBP2	0	P+K-	PK	0.04198	0.06404
8_144992361	rs7822511	T	C	0.411765	0.555556	0.294118	exonic	PLEC	synonymous SNV	P+K-	PK	0.03241	0.03408
8_144993324	rs6984820	C	T	0.388889	0.555556	0.294118	exonic	PLEC	synonymous SNV	P+K-	PK	0.03241	0.04833
8_144999684	rs35916068	A	G	0.361111	0.527778	0.266667	exonic	PLEC	synonymous SNV	P+K-	PK	0.04473	0.04647
8_145051414	rs1134027	G	A	0.416667	0.527778	0.235294	UTR3	PARP10	0	P+K-	PK	0.01504	0.05256
8_145051478	rs1134029	G	A	0.441176	0.529412	0.192308	UTR3	PARP10	0	P+K-	PK	0.01497	0.03753
8_145051484	rs1134030	C	T	0.441176	0.529412	0.192308	UTR3	PARP10	0	P+K-	PK	0.01497	0.03753
8_145578296	rs2272663	A	G	0.529412	0.6875	0.333333	exonic	TMEM249	synonymous SNV	P+K-	PK	0.007073	0.02908
9_117934	rs62533589	C	G	0.166667	0.305556	0	exonic	FOXD4	synonymous SNV	P+K-	PK	0.0003976	0.0847
9_118173	rs4146165	C	G	0.777778	0.805556	0.527778	UTR5	FOXD4	0	P+K-	PK	0.02344	0.1073
9_215511	rs2023402	C	T	0.472222	0.222222	0.583333	UTR5	C9orf66	0	P-K+	PK	0.00358	0.05771
9_215534	rs635615	C	T	0.333333	0.529412	0.25	UTR5	C9orf66	0	P+K-	PK	0.02644	0.05371
9_6533010	rs2228098	C	G	0.638889	0.805556	0.527778	UTR3	GLDC	0	P+K-	PK	0.02344	0.07208
9_12822458	rs16929629	G	A	0.222222	0.352941	0.0882353	UTR3	LURAP1L	0	P+K-	PK	0.01736	0.08686
9_14720361	rs17289263	T	C	0.0277778	0.222222	0.0277778	exonic	CER1	synonymous SNV	P+K-	PK	0.02781	0.1145
9_14801687	rs10738380	T	C	0.444444	0.444444	0.176471	exonic	FREM1	synonymous SNV	P+K-	PK	0.02098	0.08758
9_19032907	rs17810415	A	G	0.166667	0.40625	0.1	UTR5	SAXO1	0	P+K-	PK	0.00843	0.0808
9_19053279	rs151254787	T	C	0.0555556	0.205882	0	UTR3	HAUS6	0	P+K-	PK	0.004488	0.1071
9_19060197	rs41269003	A	T	0.0555556	0.205882	0.0277778	exonic	HAUS6	nonsynonymous SNV	P+K-	PK	0.02564	0.1065
9_19102828	rs7865126	T	C	0.0555556	0.25	0.0555556	UTR5	HAUS6	0	P+K-	PK	0.0457	0.1514
9_19119674	rs35568725	A	G	0.0555556	0.205882	0.0277778	exonic	PLIN2	nonsynonymous SNV	P+K-	PK	0.02564	0.1065
9_19376255	rs67710536	A	C	0.147059	0.0588235	0.264706	UTR3	RPS6	0	P-K+	PK	0.04458	0.04521
9_19376258	rs67906804	G	C	0.138889	0.0588235	0.264706	UTR3	RPS6	0	P-K+	PK	0.04458	0.04573
9_21166004	rs2939	A	G	0.194444	0	0.205882	UTR3	IFNA21	0	P-K+	PK	0.004488	0.05571
9_21186931	rs3750479	A	G	0.166667	0	0.205882	UTR3	IFNA4	0	P-K+	PK	0.004488	0.05527
9_21187121	rs113045626	T	A	0.222222	0	0.1875	exonic	IFNA4	nonsynonymous SNV	P-K+	PK	0.008279	0.04458
9_21206427	rs12555631	G	A	0.166667	0	0.214286	UTR3	IFNA10	0	P-K+	PK	0.007525	0.02411
9_21206763	rs56035072	G	T	0.176471	0	0.194444	exonic	IFNA10	nonsynonymous SNV	P-K+	PK	0.01133	0.05527
9_21207000	rs10113875	C	G	0.25	0	0.277778	exonic	IFNA10	nonsynonymous SNV	P-K+	PK	0.0009481	0.0847
9_21207005	rs10113876	C	G	0.25	0	0.277778	exonic	IFNA10	nonsynonymous SNV	P-K+	PK	0.0009481	0.0847
9_21207031	rs10117060	T	C	0.25	0	0.277778	exonic	IFNA10	synonymous SNV	P-K+	PK	0.0009481	0.0847
9_21207037	rs10119910	A	T	0.25	0	0.277778	exonic	IFNA10	stopgain	P-K+	PK	0.0009481	0.0847
9_21227622	rs9298814	A	C	0.222222	0	0.147059	exonic	IFNA17	nonsynonymous SNV	P-K+	PK	0.02299	0.05527
9_21227651	rs7025879	A	G	0.222222	0	0.205882	exonic	IFNA17	synonymous SNV	P-K+	PK	0.004488	0.05571
9_21227942	rs10117962	G	T	0.25	0.0277778	0.277778	exonic	IFNA17	synonymous SNV	P-K+	PK	0.006453	0.0847
9_21228040	rs12552812	C	G	0.25	0.0277778	0.277778	exonic	IFNA17	nonsynonymous SNV	P-K+	PK	0.006453	0.0847
9_21228182	rs10757201	G	T	0.25	0.0277778	0.277778	UTR5	IFNA17	0	P-K+	PK	0.006453	0.0847
9_21228183	rs10757202	C	G	0.25	0.0277778	0.277778	UTR5	IFNA17	0	P-K+	PK	0.006453	0.0847
9_21304803	rs10757212	G	A	0.166667	0.0277778	0.277778	exonic	IFNA5	synonymous SNV	P-K+	PK	0.006453	0.0632
9_21350620	rs2988573	G	A	0.166667	0	0.205882	exonic	IFNA6	synonymous SNV	P-K+	PK	0.004488	0.05527
9_21864098	rs10117507	G	A	0.277778	0.111111	0.323529	UTR3	MTAP	0	P-K+	PK	0.04203	0.046
9_21968199	rs11515	C	G	1	1	0.857143	UTR3	CDKN2A	0	P+K-	PK	0.04826	0.09573
9_21975017	rs3814960	C	T	0.638889	0.694444	0.411765	UTR5	CDKN2A	0	P+K-	PK	0.02958	0.05026
9_25677953	rs34498078	T	C	0.941176	0.823529	1	exonic	TUSC1	nonsynonymous SNV	P-K+	PK	0.02457	0.05058
9_26904699	rs16910873	T	G	0.147059	0.235294	0.0555556	UTR3	PLAA	0	P+K-	PK	0.04263	0.08323
9_26994221	rs10812510	A	T	0.166667	0.0384615	0.333333	UTR3	LRRC19	0	P-K+	PK	0.009401	0.02234
9_27546890	rs13691	G	A	0.235294	0.46875	0.166667	UTR3	C9orf72	0	P+K-	PK	0.01485	0.04857
9_32425910	rs3780473	A	G	0.194444	0.333333	0.117647	exonic	ACO1	synonymous SNV	P+K-	PK	0.046	0.06405
9_32786553	rs300639	T	C	1	0.95	0.611111	UTR3	TMEM215	0	P+K-	PK	0.01649	0.02419
9_33441826	rs16919255	C	A	0.222222	0.0833333	0.305556	UTR3	AQP3	0	P-K+	PK	0.03457	0.09423
9_34832132	rs16931814	C	T	0.111111	0.0555556	0.25	ncRNA_exonic	FAM205BP	0	P-K+	PK	0.0457	0.05527
9_35479920	rs41277047	T	A	0.111111	0.0555556	0.25	ncRNA_exonic	ATP8B5P	0	P-K+	PK	0.0457	0.0847
9_69425083	rs371086738	A	G	0.166667	0.55	0.181818	ncRNA_intronic	ANKRD20A4-ANKRD20A20P	0	P+K-	PK	0.0231	0.04721
9_69664315	rs374528828	G	A	0.269231	0.227273	0.538462	ncRNA_exonic	LOC100133920	0	P-K+	PK	0.03969	0.1359
9_69664346	rs201640314	A	G	0.3	0.3	0.590909	ncRNA_exonic	LOC100133920	0	P-K+	PK	0.04902	0.167
9_69664510	rs199926803	T	C	0.361111	0.444444	0.138889	ncRNA_exonic	LOC100133920	0	P+K-	PK	0.008624	0.2109
9_70970401	.	T	C	0	0	0.153846	ncRNA_exonic	PGM5-AS1	0	P-K+	PK	0.04727	0.0938
9_71396426	rs12349968	A	G	0.138889	0.147059	0	UTR3	FAM122A	0	P+K-	PK	0.02299	0.08024
9_71862975	rs2282336	C	T	0.25	0.388889	0.111111	exonic	TJP2	synonymous SNV	P+K-	PK	0.01295	0.0632
9_71862987	rs2095876	G	A	0.25	0.388889	0.111111	exonic	TJP2	synonymous SNV	P+K-	PK	0.01295	0.0632
9_74360096	rs25689	C	T	0.305556	0.333333	0.0833333	exonic	TMEM2	nonsynonymous SNV	P+K-	PK	0.01824	0.09423
9_79228700	rs73650263	A	T	0.117647	0.3125	0.0666667	UTR3	PRUNE2	0	P+K-	PK	0.02264	0.06246
9_95258119	rs10429459	A	G	0	0.35	0.0769231	UTR3	ECM2	0	P+K-	PK	0.02883	0.04777
9_97349666	rs573212	C	G	0.972222	0.916667	0.694444	exonic	FBP2	nonsynonymous SNV	P+K-	PK	0.03457	0.1514
9_101017990	rs7853847	C	G	0.0454545	0.409091	0.0555556	UTR5	TBC1D2	0	P+K-	PK	0.01264	0.01973
9_103235853	rs77849433	G	T	0.0588235	0	0.133333	exonic	TMEFF1	synonymous SNV	P-K+	PK	0.04313	0.1132
9_103348208	rs28623148	A	T	0.111111	0.25	0.0555556	exonic	CAVIN4	synonymous SNV	P+K-	PK	0.0457	0.1065
9_103349568	rs10989163	A	G	0.15625	0.266667	0	UTR3	CAVIN4	0	P+K-	PK	0.004575	0.05397
9_103349779	rs10989164	A	C	0.05	0.222222	0	UTR3	CAVIN4	0	P+K-	PK	0.01573	0.08608
9_104124099	rs41274981	C	T	0.166667	0.382353	0.117647	UTR3	BAAT	0	P+K-	PK	0.02335	0.04332
9_104130469	rs41281027	C	G	0.25	0.388889	0.117647	exonic	BAAT	nonsynonymous SNV	P+K-	PK	0.01339	0.05079
9_104333864	rs12342026	G	A	0.0833333	0.235294	0.0294118	UTR3	GRIN3A	0	P+K-	PK	0.02718	0.08024
9_111617341	rs3750467	A	G	0.305556	0.333333	0.0882353	exonic	ACTL7B	synonymous SNV	P+K-	PK	0.01867	0.06021
9_113132221	rs17204533	G	A	0.0833333	0.235294	0.0555556	exonic	SVEP1	nonsynonymous SNV	P+K-	PK	0.04263	0.08024
9_116060487	rs3750532	T	C	0.375	0.222222	0.666667	UTR5	RNF183	0	P-K+	PK	0.005844	0.0155
9_116133095	rs10817488	T	C	0.25	0.5	0.222222	UTR3	BSPRY	0	P+K-	PK	0.02415	0.03783
9_116150109	rs818708	G	A	0.638889	0.611111	0.305556	UTR3	ALAD	0	P+K-	PK	0.01739	0.05851
9_117846580	rs1061494	T	C	0.444444	0.555556	0.264706	exonic	TNC	nonsynonymous SNV	P+K-	PK	0.01661	0.05371
9_123929770	rs61745682	C	T	0.25	0.25	0.0588235	exonic	CNTRL	synonymous SNV	P+K-	PK	0.04626	0.1291
9_123941042	rs57748928	C	G	0.25	0.277778	0.0625	UTR3	RAB14	0	P+K-	PK	0.02638	0.09573
9_127710312	rs13299805	T	C	0.0555556	0	0.166667	UTR3	SCAI	0	P-K+	PK	0.02511	0.05058
9_133936571	rs3739510	C	G	0.833333	0.694444	0.916667	exonic	LAMC3	nonsynonymous SNV	P-K+	PK	0.03457	0.0632
9_135448320	rs433311	C	A	0.638889	0.722222	0.9375	UTR3	CFAP77	0	P-K+	PK	0.02638	0.07718
9_136308542	rs3124767	C	T	0.472222	0.676471	0.388889	exonic	ADAMTS13	synonymous SNV	P+K-	PK	0.01879	0.06084
9_136334910	rs3094379	T	C	0.75	0.694444	0.916667	UTR3	CACFD1	0	P-K+	PK	0.03457	0.0632
9_136340200	rs2073935	T	G	0.694444	0.666667	0.888889	exonic	SLC2A6	synonymous SNV	P-K+	PK	0.0451	0.07949
9_138378856	rs2078266	A	G	0.861111	1	0.777778	exonic	PPP1R26	nonsynonymous SNV	P+K-	PK	0.005056	0.0847
9_138908250	rs2275107	C	T	0.222222	0	0.25	exonic	NACC2	synonymous SNV	P-K+	PK	0.002212	0.0632
9_139094805	rs2274116	C	T	0.205882	0.375	0.09375	exonic	LHX3	synonymous SNV	P+K-	PK	0.0164	0.04969
9_139217089	rs57825369	C	T	0.472222	0.1875	0.441176	ncRNA_exonic	DKFZP434A062	0	P-K+	PK	0.03569	0.04647
9_139217489	rs28714232	C	T	0.4375	0.09375	0.441176	ncRNA_exonic	DKFZP434A062	0	P-K+	PK	0.002061	0.04999
9_139217493	rs28444490	C	T	0.411765	0.09375	0.441176	ncRNA_exonic	DKFZP434A062	0	P-K+	PK	0.002061	0.04534
9_139217805	rs28545822	T	C	0.472222	0.194444	0.444444	ncRNA_exonic	DKFZP434A062	0	P-K+	PK	0.04198	0.05611
9_139218912	rs62579954	G	T	0.472222	0.194444	0.444444	ncRNA_exonic	DKFZP434A062	0	P-K+	PK	0.04198	0.05611
9_139220201	rs35803302	G	C	0.444444	0.125	0.46875	ncRNA_exonic	DKFZP434A062	0	P-K+	PK	0.005418	0.04
10_1205839	rs11812775	T	C	0.125	0.1875	0.0277778	ncRNA_exonic	LINC00200	0	P+K-	PK	0.04573	0.07284
10_5415954	rs10904481	A	G	0.583333	0.361111	0.647059	exonic	UCN3	nonsynonymous SNV	P-K+	PK	0.03065	0.09294
10_6158412	rs8463	A	G	0.1	0.0333333	0.266667	UTR3	RBM17	0	P-K+	PK	0.02569	0.05231
10_11356160	rs2246449	C	T	0.388889	0.444444	0.75	exonic	CELF2	synonymous SNV	P-K+	PK	0.01558	0.1554
10_11375659	rs17454839	A	C	0.0555556	0.0625	0.333333	ncRNA_intronic	CELF2-AS1	0	P-K+	PK	0.009644	0.08159
10_11376999	rs1051765	A	G	0.111111	0.0277778	0.333333	ncRNA_intronic	CELF2-AS1	0	P-K+	PK	0.001336	0.1113
10_12171740	rs11257552	G	A	0.366667	0.633333	0.3	UTR5	SEC61A2	0	P+K-	PK	0.0191	0.03553
10_12939124	rs10795991	G	A	0.361111	0.222222	0.472222	UTR3	CCDC3	0	P-K+	PK	0.04661	0.08497
10_18089682	rs78874899	T	A	0.5	0.5625	0.875	UTR3	TMEM236	0	P-K+	PK	0.01806	0.02154
10_21070657	rs78806491	C	T	0.09375	0.0333333	0.214286	UTR3	NEBL	0	P-K+	PK	0.0483	0.06693
10_21783634	rs12770228	G	A	0.111111	0.305556	0.0833333	UTR3	CASC10	0	P+K-	PK	0.03457	0.0847
10_21783752	rs35106872	A	G	0.214286	0.366667	0.05	UTR3	CASC10	0	P+K-	PK	0.01603	0.04121
10_21806832	rs946711	A	C	0.194444	0.305556	0.0833333	UTR5	SKIDA1	0	P+K-	PK	0.03457	0.09423
10_21827796	rs1802669	G	A	0.166667	0.388889	0.138889	exonic	MLLT10	synonymous SNV	P+K-	PK	0.03086	0.09423
10_28101311	rs1061577	T	C	0.0333333	0.176471	0	UTR3	ARMC4	0	P+K-	PK	0.02586	0.05819
10_28966494	rs1888085	T	G	0.194444	0.305556	0.0555556	UTR5	BAMBI	0	P+K-	PK	0.01201	0.1113
10_33214802	rs2298141	A	G	0.0909091	0.192308	0	exonic	ITGB1	synonymous SNV	P+K-	PK	0.0208	0.04483
10_33246769	rs117969846	G	T	0.25	0.125	0.5	UTR5	ITGB1	0	P-K+	PK	0.002997	0.02625
10_37488689	rs1209750	G	C	0.178571	0.147059	0.466667	exonic	ANKRD30A	nonsynonymous SNV	P-K+	PK	0.006724	0.02749
10_38737231	rs34016086	C	T	0.111111	0.0555556	0.25	ncRNA_exonic	LINC00999	0	P-K+	PK	0.0457	0.1065
10_38740050	rs74890899	C	T	0.111111	0.0555556	0.25	ncRNA_exonic	LINC00999	0	P-K+	PK	0.0457	0.1065
10_42831253	rs200296031	A	G	0.117647	0.222222	0	ncRNA_exonic	LOC441666	0	P+K-	PK	0.005129	0.1071
10_42833104	rs12262497	G	A	0.2	0.0833333	0.321429	ncRNA_exonic	LOC441666	0	P-K+	PK	0.02328	0.03772
10_43595968	rs1800858	A	G	0.833333	0.666667	0.916667	exonic	RET	synonymous SNV	P-K+	PK	0.01824	0.055
10_43624317	rs2742240	A	T	0.794118	0.59375	0.888889	UTR3	RET	0	P-K+	PK	0.01024	0.034
10_43625223	rs2742241	G	A	0.777778	0.611111	0.888889	UTR3	RET	0	P-K+	PK	0.01295	0.055
10_43679800	rs1059484	T	G	0.805556	0.666667	0.888889	UTR3	CSGALNACT2	0	P-K+	PK	0.0451	0.0632
10_43690391	rs1254967	G	A	0.194444	0.333333	0.111111	UTR3	RASGEF1A	0	P+K-	PK	0.0451	0.0632
10_43691691	rs1254968	C	T	0.222222	0.333333	0.111111	UTR3	RASGEF1A	0	P+K-	PK	0.0451	0.06404
10_44865739	rs1804430	T	C	0	0.166667	0	UTR3	CXCL12	0	P+K-	PK	0.02493	0.1987
10_44865841	rs1804429	A	C	0	0.166667	0	UTR3	CXCL12	0	P+K-	PK	0.02493	0.1987
10_44865976	rs1065297	A	G	0	0.166667	0	UTR3	CXCL12	0	P+K-	PK	0.02493	0.1987
10_44866628	rs2839696	G	A	0	0.205882	0	UTR3	CXCL12	0	P+K-	PK	0.01194	0.05548
10_44867304	rs2522	A	G	0	0.194444	0	UTR3	CXCL12	0	P+K-	PK	0.01145	0.05414
10_44867630	rs10900031	G	A	0	0.166667	0	UTR3	CXCL12	0	P+K-	PK	0.02493	0.1987
10_44868465	rs12258838	C	T	0	0.166667	0	exonic	CXCL12	synonymous SNV	P+K-	PK	0.02493	0.1987
10_50025396	rs7097397	G	A	0.277778	0.472222	0.222222	exonic	WDFY4	nonsynonymous SNV	P+K-	PK	0.04661	0.08497
10_50038800	rs3747874	A	G	0.527778	0.722222	0.444444	exonic	WDFY4	synonymous SNV	P+K-	PK	0.03066	0.09619
10_51465138	rs201025969	C	T	0.107143	0.0769231	0.346154	ncRNA_exonic	AGAP7P	0	P-K+	PK	0.03845	0.0414
10_58118630	rs2241666	T	C	0.722222	0.638889	0.916667	exonic	ZWINT	nonsynonymous SNV	P-K+	PK	0.009279	0.09423
10_60145342	rs1937	G	C	0.0833333	0	0.222222	exonic	TFAM	nonsynonymous SNV	P-K+	PK	0.005056	0.1514
10_60155120	rs1049432	G	T	0.0882353	0	0.222222	UTR3	TFAM	0	P-K+	PK	0.005129	0.08024
10_71678058	rs2274181	C	G	0.277778	0.111111	0.388889	exonic	COL13A1	synonymous SNV	P-K+	PK	0.01295	0.07949
10_71718724	rs1061966	C	G	0.333333	0.25	0.555556	UTR3	COL13A1	0	P-K+	PK	0.01558	0.05371
10_73822507	rs1530803	C	T	0.361111	0.194444	0.444444	UTR3	SPOCK2	0	P-K+	PK	0.04198	0.07208
10_74035041	rs1053639	T	A	0.527778	0.5	0.222222	UTR3	DDIT4	0	P+K-	PK	0.02631	0.05771
10_76468851	rs1189553	C	T	0.764706	0.882353	0.633333	UTR3	ADK	0	P+K-	PK	0.03634	0.05116
10_89103295	rs61858507	T	G	0.384615	0.0833333	0.384615	ncRNA_exonic	LINC00863	0	P-K+	PK	0.01949	0.0243
10_90750909	rs12775501	C	T	0.361111	0.666667	0.333333	UTR5	ACTA2	0	P+K-	PK	0.009049	0.09353
10_91178804	rs304447	T	C	0.558824	0.305556	0.625	UTR3	IFIT5	0	P-K+	PK	0.0142	0.03219
10_93999850	rs3824734	A	G	0.416667	0.305556	0.588235	exonic	CPEB3	synonymous SNV	P-K+	PK	0.02958	0.03066
10_97074287	rs11188272	G	C	0.166667	0.25	0.0555556	UTR3	SORBS1	0	P+K-	PK	0.0457	0.1113
10_97817650	rs17111275	G	T	0.111111	0.166667	0	exonic	CCNJ	synonymous SNV	P+K-	PK	0.02493	0.1145
10_97920062	rs3814226	G	A	0.0625	0.15625	0	exonic	ZNF518A	unknown	P+K-	PK	0.02253	0.05813
10_98104703	rs11188724	C	T	0.472222	0.194444	0.441176	UTR3	OPALIN	0	P-K+	PK	0.03903	0.04833
10_102247408	rs2298075	C	A	0.138889	0.111111	0.361111	exonic	SEC31B	nonsynonymous SNV	P-K+	PK	0.02463	0.09423
10_102247526	rs2298074	G	C	0.138889	0.111111	0.333333	exonic	SEC31B	synonymous SNV	P-K+	PK	0.0451	0.1348
10_102265183	rs2295772	G	A	0.166667	0.111111	0.323529	exonic	SEC31B	nonsynonymous SNV	P-K+	PK	0.04203	0.07949
10_102587574	rs12098288	T	C	0.266667	0	0.227273	UTR3	PAX2	0	P-K+	PK	0.01921	0.03759
10_102824760	rs12359843	G	T	0.194444	0.361111	0.0588235	UTR3	KAZALD1	0	P+K-	PK	0.002866	0.07949
10_102850085	rs12778304	T	C	0.111111	0.382353	0.111111	ncRNA_exonic	TLX1NB	0	P+K-	PK	0.01167	0.07949
10_102896849	rs17113735	G	A	0.166667	0.0833333	0.333333	ncRNA_intronic	TLX1NB	0	P-K+	PK	0.01824	0.0451
10_102897057	rs1051723	C	T	0.111111	0.305556	0.0882353	ncRNA_intronic	TLX1NB	0	P+K-	PK	0.0352	0.08543
10_102897193	rs75473078	T	C	0.0277778	0.166667	0	ncRNA_intronic	TLX1NB	0	P+K-	PK	0.02493	0.1145
10_102897311	rs1051725	A	G	0.111111	0.333333	0.111111	ncRNA_intronic	TLX1NB	0	P+K-	PK	0.0451	0.1113
10_103991381	rs2281983	G	A	0.5	0.722222	0.466667	exonic	PITX3	synonymous SNV	P+K-	PK	0.04481	0.04789
10_105798872	rs2274100	T	C	0.694444	0.583333	0.916667	exonic	COL17A1	synonymous SNV	P-K+	PK	0.002157	0.1073
10_105799216	rs2296219	G	T	0.694444	0.583333	0.888889	exonic	COL17A1	synonymous SNV	P-K+	PK	0.006554	0.09423
10_105801253	rs4918079	G	A	0.666667	0.583333	0.861111	exonic	COL17A1	synonymous SNV	P-K+	PK	0.01664	0.07208
10_105810400	rs805722	T	C	0.666667	0.555556	0.888889	exonic	COL17A1	nonsynonymous SNV	P-K+	PK	0.003191	0.07208
10_105819956	rs805701	G	A	0.555556	0.472222	0.794118	exonic	COL17A1	synonymous SNV	P-K+	PK	0.006838	0.04833
10_105824333	rs805708	G	A	0.555556	0.472222	0.777778	exonic	COL17A1	nonsynonymous SNV	P-K+	PK	0.01419	0.05371
10_113910721	rs1129555	A	G	0.888889	0.638889	0.882353	UTR3	GPAM	0	P-K+	PK	0.02528	0.07949
10_113940329	rs2792751	T	C	0.84375	0.633333	0.961538	exonic	GPAM	nonsynonymous SNV	P-K+	PK	0.003131	0.03661
10_114111543	rs2148493	C	T	0.777778	0.916667	0.617647	ncRNA_exonic	GUCY2GP	0	P+K-	PK	0.003991	0.0352
10_116073696	rs3813722	C	T	0.527778	0.777778	0.5	exonic	AFAP1L2	synonymous SNV	P+K-	PK	0.02631	0.08497
10_116073801	rs621375	T	C	0.444444	0.222222	0.5	exonic	AFAP1L2	synonymous SNV	P-K+	PK	0.02631	0.07907
10_123996976	rs2295879	G	A	0.5	0.5	0.222222	exonic	TACC2	nonsynonymous SNV	P+K-	PK	0.02631	0.09619
10_124013604	rs3763763	C	A	0.416667	0.470588	0.222222	UTR3	TACC2	0	P+K-	PK	0.04346	0.08515
10_124545656	rs7911308	C	A	0.694444	0.666667	0.888889	ncRNA_exonic	DMBT1P1	0	P-K+	PK	0.0451	0.1073
10_125505453	rs9060	C	T	0.472222	0.444444	0.176471	UTR3	CPXM2	0	P+K-	PK	0.02098	0.08047
10_133996083	rs3750698	G	A	0.138889	0.0555556	0.388889	UTR3	JAKMIP3	0	P-K+	PK	0.001263	0.0632
10_134018521	rs115200472	C	T	0.0277778	0.0555556	0.277778	UTR3	DPYSL4	0	P-K+	PK	0.02383	0.05389
10_134018817	rs115894950	G	A	0.0277778	0.0588235	0.305556	UTR3	DPYSL4	0	P-K+	PK	0.01228	0.04263
10_134019267	rs145274474	G	A	0.0277778	0.0555556	0.305556	UTR3	DPYSL4	0	P-K+	PK	0.01201	0.05527
10_134021171	rs3814606	C	G	0.0277778	0.0555556	0.305556	UTR3	STK32C	0	P-K+	PK	0.01201	0.05527
10_134021485	rs3814608	C	T	0.0277778	0.0555556	0.277778	UTR3	STK32C	0	P-K+	PK	0.02383	0.05389
10_135440122	rs200811760	T	C	0.428571	0.6	0.1	exonic	FRG2B	nonsynonymous SNV	P+K-	PK	0.0022	0.03463
10_135440123	.	C	T	0.428571	0.6	0.1	exonic	FRG2B	nonsynonymous SNV	P+K-	PK	0.0022	0.03463
11_280221	rs6421985	A	C	0.75	0.735294	0.464286	exonic	NLRP6	nonsynonymous SNV	P+K-	PK	0.03811	0.03863
11_284538	rs6598047	T	C	0.416667	0.583333	0.25	exonic	NLRP6	synonymous SNV	P+K-	PK	0.008046	0.09353
11_308178	rs1058873	T	C	0.5	0.388889	0.666667	UTR5	IFITM2	0	P-K+	PK	0.0329	0.1554
11_1094690	rs10794291	C	T	0.676471	0.470588	0.805556	exonic	MUC2	synonymous SNV	P-K+	PK	0.00565	0.04339
11_1104296	rs7928098	G	C	0.0833333	0.166667	0	UTR3	MUC2	0	P+K-	PK	0.02511	0.05571
11_1255773	rs7116614	C	T	0.361111	0.194444	0.472222	exonic	MUC5B	synonymous SNV	P-K+	PK	0.02344	0.1285
11_1264362	rs11605113	A	G	0.361111	0.194444	0.5	exonic	MUC5B	synonymous SNV	P-K+	PK	0.01253	0.1285
11_1265107	rs200657721	C	T	0	0.176471	0	exonic	MUC5B	nonsynonymous SNV	P+K-	PK	0.02457	0.1145
11_1266696	.	A	C	0.444444	0.222222	0.611111	exonic	MUC5B	synonymous SNV	P-K+	PK	0.001666	0.05771
11_1266716	rs200243273	T	C	0.388889	0.222222	0.583333	exonic	MUC5B	nonsynonymous SNV	P-K+	PK	0.00358	0.08497
11_1267562	rs60268710	C	T	0.361111	0.194444	0.472222	exonic	MUC5B	nonsynonymous SNV	P-K+	PK	0.02344	0.1285
11_1268064	rs200948102	C	T	0.361111	0.138889	0.375	exonic	MUC5B	synonymous SNV	P-K+	PK	0.04766	0.1036
11_1269398	rs148995598	C	T	0.277778	0.147059	0.423077	exonic	MUC5B	nonsynonymous SNV	P-K+	PK	0.02118	0.0986
11_1269627	rs4963056	C	T	0.333333	0.194444	0.472222	exonic	MUC5B	synonymous SNV	P-K+	PK	0.02344	0.1285
11_1271508	rs12418291	G	A	0.361111	0.194444	0.472222	exonic	MUC5B	synonymous SNV	P-K+	PK	0.02344	0.1285
11_1296649	rs3168046	G	A	0.527778	0.583333	0.323529	UTR3	TOLLIP	0	P+K-	PK	0.03408	0.09832
11_1687684	rs202130518	G	C	0.558824	0.65625	0.911765	ncRNA_exonic	FAM99A	0	P-K+	PK	0.01568	0.03191
11_1874266	rs2089909	C	T	0.222222	0.294118	0.0555556	UTR5	LSP1	0	P+K-	PK	0.01082	0.07517
11_2169774	rs3741208	A	G	0.535714	0.5625	0.875	ncRNA_exonic	IGF2-AS	0	P-K+	PK	0.01806	0.02492
11_4406479	rs4144331	G	T	0.166667	0.333333	0.0882353	UTR3	TRIM21	0	P+K-	PK	0.01867	0.0451
11_4411241	rs926101	C	T	0.235294	0.470588	0.21875	exonic	TRIM21	synonymous SNV	P+K-	PK	0.04073	0.05709
11_5248243	rs713040	A	G	0.638889	0.694444	0.416667	exonic	HBB	synonymous SNV	P+K-	PK	0.03205	0.09353
11_5345486	rs4910750	G	A	0.888889	0.75	0.941176	exonic	OR51B2	synonymous SNV	P-K+	PK	0.04626	0.0847
11_5364276	rs4910551	G	A	0.416667	0.277778	0.588235	exonic	OR51B5	nonsynonymous SNV	P-K+	PK	0.0151	0.09281
11_5364450	rs11036912	A	G	0.416667	0.277778	0.555556	exonic	OR51B5	nonsynonymous SNV	P-K+	PK	0.03066	0.09353
11_5373111	rs7479477	G	A	0.277778	0.138889	0.382353	exonic	OR51B6	nonsynonymous SNV	P-K+	PK	0.02847	0.034
11_5373114	rs5006888	G	A	0.722222	0.5	0.764706	exonic	OR51B6	nonsynonymous SNV	P-K+	PK	0.02755	0.04722
11_5373129	rs5006887	C	T	0.277778	0.138889	0.382353	exonic	OR51B6	nonsynonymous SNV	P-K+	PK	0.02847	0.034
11_5373170	rs5006886	C	G	0.277778	0.138889	0.382353	exonic	OR51B6	nonsynonymous SNV	P-K+	PK	0.02847	0.034
11_5373242	rs5006885	T	G	0.277778	0.138889	0.382353	exonic	OR51B6	nonsynonymous SNV	P-K+	PK	0.02847	0.034
11_5373251	rs5006884	C	T	0.277778	0.138889	0.382353	exonic	OR51B6	nonsynonymous SNV	P-K+	PK	0.02847	0.034
11_5373334	rs5006882	A	G	0.277778	0.138889	0.382353	exonic	OR51B6	synonymous SNV	P-K+	PK	0.02847	0.034
11_5373562	rs5024042	C	A	0.264706	0.111111	0.4	exonic	OR51B6	nonsynonymous SNV	P-K+	PK	0.009204	0.02873
11_5373646	rs5024041	T	C	0.722222	0.5	0.764706	exonic	OR51B6	synonymous SNV	P-K+	PK	0.02755	0.04722
11_5475118	rs12577167	A	G	0.25	0.25	0.527778	exonic	OR51I2	nonsynonymous SNV	P-K+	PK	0.02873	0.08497
11_5528918	rs2227271	C	T	0.166667	0.388889	0.138889	exonic	UBQLN3	nonsynonymous SNV	P+K-	PK	0.03086	0.1552
11_5602968	rs10769086	G	A	0.833333	0.972222	0.777778	exonic	OR52B6	nonsynonymous SNV	P+K-	PK	0.02781	0.0847
11_6239139	rs11040809	A	G	0.194444	0.0833333	0.361111	exonic	FAM160A2	synonymous SNV	P-K+	PK	0.009279	0.0632
11_6569896	rs11606889	G	A	0.25	0.0588235	0.25	exonic	DNHD1	nonsynonymous SNV	P-K+	PK	0.04137	0.04263
11_6630833	rs1043390	G	A	0.305556	0.305556	0.0555556	exonic	ILK	synonymous SNV	P+K-	PK	0.01201	0.07949
11_6702409	rs3741277	C	T	0.111111	0.25	0.0555556	UTR3	MRPL17	0	P+K-	PK	0.0457	0.1065
11_6737138	rs3741274	T	C	0	0.352941	0.0714286	ncRNA_exonic	GVINP1	0	P+K-	PK	0.01312	0.02648
11_6737893	rs11040980	C	T	0.0294118	0.264706	0.0625	ncRNA_exonic	GVINP1	0	P+K-	PK	0.04521	0.05079
11_6737927	rs11040981	G	A	0.138889	0.28125	0.0333333	ncRNA_exonic	GVINP1	0	P+K-	PK	0.01296	0.04332
11_6738291	rs11040983	C	T	0.09375	0.361111	0.111111	ncRNA_exonic	GVINP1	0	P+K-	PK	0.02463	0.05943
11_6739551	rs11040984	T	C	0.166667	0.333333	0.09375	ncRNA_exonic	GVINP1	0	P+K-	PK	0.02103	0.06151
11_6740136	rs10839601	G	A	0.117647	0.388889	0.0882353	ncRNA_exonic	GVINP1	0	P+K-	PK	0.004733	0.046
11_6740206	rs10839602	C	T	0.194444	0.361111	0.0882353	ncRNA_exonic	GVINP1	0	P+K-	PK	0.009567	0.04203
11_6789294	rs7924459	G	C	0.25	0.222222	0.472222	exonic	OR2AG2	nonsynonymous SNV	P-K+	PK	0.04661	0.1285
11_7022160	rs2857919	A	G	0.96875	1	0.875	exonic	ZNF214	nonsynonymous SNV	P+K-	PK	0.04989	0.09745
11_7949350	rs4758258	A	G	0.75	0.852941	0.566667	exonic	OR10A6	nonsynonymous SNV	P+K-	PK	0.01378	0.03331
11_9303787	rs7358313	C	T	0.0833333	0	0.2	UTR3	TMEM41B	0	P-K+	PK	0.04329	0.06846
11_9316730	rs4396289	T	C	0.4375	0.3125	0.0882353	UTR3	TMEM41B	0	P+K-	PK	0.03065	0.04432
11_10647702	rs2241489	G	A	0.305556	0.5	0.222222	exonic	MRVI1	synonymous SNV	P+K-	PK	0.02631	0.08497
11_11292428	rs72859239	C	G	0.0333333	0	0.192308	UTR3	GALNT18	0	P-K+	PK	0.01436	0.04826
11_18429450	rs3758681	A	G	0.583333	0.705882	0.4375	UTR3	LDHA	0	P+K-	PK	0.0455	0.04896
11_18731004	rs72880717	C	G	0.277778	0.194444	0.444444	exonic	IGSF22	synonymous SNV	P-K+	PK	0.04198	0.1073
11_18735947	rs7125943	T	C	0.638889	0.694444	0.416667	exonic	IGSF22	nonsynonymous SNV	P+K-	PK	0.03205	0.09353
11_18738281	rs10766494	C	T	0.617647	0.694444	0.388889	exonic	IGSF22	nonsynonymous SNV	P+K-	PK	0.01739	0.09138
11_18738329	rs61886891	C	T	0.222222	0.176471	0.444444	exonic	IGSF22	nonsynonymous SNV	P-K+	PK	0.02098	0.1022
11_25103541	rs7946603	A	T	0.5	0.5	0.233333	UTR3	LUZP2	0	P+K-	PK	0.03778	0.04662
11_27387632	rs8290	G	A	0.615385	0.625	0.3	UTR3	LGR4	0	P+K-	PK	0.01256	0.03553
11_32459452	rs10835908	C	G	0.305556	0.416667	0.138889	ncRNA_exonic	WT1-AS	0	P+K-	PK	0.01664	0.055
11_33692315	rs3741021	T	G	0.0833333	0.346154	0.0416667	UTR3	KIAA1549L	0	P+K-	PK	0.01132	0.07759
11_33692422	rs3741020	T	C	0.25	0.361111	0.111111	UTR3	KIAA1549L	0	P+K-	PK	0.02463	0.1073
11_33693548	rs3781839	G	C	0.25	0.361111	0.111111	UTR3	KIAA1549L	0	P+K-	PK	0.02463	0.1073
11_33693889	rs7101438	T	C	0.277778	0.352941	0.111111	UTR3	KIAA1549L	0	P+K-	PK	0.02259	0.07949
11_34501064	rs11032717	C	A	0.1	0	0.142857	UTR3	ELF5	0	P-K+	PK	0.0367	0.04416
11_34680598	rs11032804	C	A	0.192308	0.416667	0.125	UTR3	EHF	0	P+K-	PK	0.02678	0.03132
11_36422792	rs330261	G	A	0.888889	0.916667	0.694444	exonic	PRR5L	nonsynonymous SNV	P+K-	PK	0.03457	0.1113
11_44640268	rs1139971	A	G	0.805556	0.916667	0.666667	exonic	CD82	nonsynonymous SNV	P+K-	PK	0.01824	0.07949
11_45975130	rs3736508	C	T	0.0588235	0.166667	0	exonic	PHF21A	nonsynonymous SNV	P+K-	PK	0.02493	0.05527
11_46403649	rs20542	G	A	0.222222	0.111111	0.333333	exonic	MDK	synonymous SNV	P-K+	PK	0.0451	0.09423
11_46695414	rs13448	T	C	0.388889	0.444444	0.194444	UTR3	ATG13	0	P+K-	PK	0.04198	0.05054
11_46745003	rs5896	C	T	0.222222	0.333333	0.0833333	exonic	F2	nonsynonymous SNV	P+K-	PK	0.01824	0.07949
11_46879973	rs3829940	A	G	0.694444	0.611111	0.861111	ncRNA_intronic	LRP4-AS1	0	P-K+	PK	0.03086	0.04661
11_46890165	rs3816614	C	T	0.694444	0.611111	0.861111	exonic	LRP4	nonsynonymous SNV	P-K+	PK	0.03086	0.04661
11_46890197	rs2290883	G	A	0.222222	0.333333	0.0833333	exonic	LRP4	synonymous SNV	P+K-	PK	0.01824	0.07949
11_46897446	rs2306033	G	A	0.222222	0.305556	0.0833333	exonic	LRP4	nonsynonymous SNV	P+K-	PK	0.03457	0.07949
11_57948952	rs2443443	G	A	0.863636	0.5	0.954545	UTR3	OR9Q1	0	P-K+	PK	0.0007665	0.0171
11_57982229	rs1966836	A	G	0.805556	0.633333	0.923077	exonic	OR1S1	nonsynonymous SNV	P-K+	PK	0.01258	0.0327
11_58977372	rs12791481	T	G	0.423077	0.192308	0.5	UTR3	MPEG1	0	P-K+	PK	0.03986	0.04755
11_60776209	rs11230563	C	T	0.138889	0.472222	0.194444	exonic	CD6	nonsynonymous SNV	P+K-	PK	0.02344	0.0451
11_61730234	rs1800009	T	C	0.666667	0.527778	0.805556	exonic	BEST1	synonymous SNV	P-K+	PK	0.02344	0.08979
11_63284035	rs3781604	A	G	0.222222	0.117647	0.333333	UTR3	LGALS12	0	P-K+	PK	0.046	0.08949
11_63284054	rs3781603	G	C	0.25	0.117647	0.333333	UTR3	LGALS12	0	P-K+	PK	0.046	0.07517
11_64480930	rs12273892	A	T	0.09375	0	0.2	exonic	NRXN2	nonsynonymous SNV	P-K+	PK	0.006535	0.05819
11_64981587	rs11605632	G	A	0.111111	0.222222	0.472222	exonic	SLC22A20	nonsynonymous SNV	P-K+	PK	0.04661	0.06404
11_66272142	rs1671063	A	G	0.361111	0.472222	0.166667	exonic	DPP3	synonymous SNV	P+K-	PK	0.01065	0.07907
11_66299515	rs8432	A	G	0.333333	0.472222	0.166667	UTR3	BBS1	0	P+K-	PK	0.01065	0.07907
11_66300463	rs1791686	G	A	0.666667	0.5	0.833333	UTR3	BBS1	0	P-K+	PK	0.005381	0.07208
11_66313203	rs2305534	T	C	0.166667	0.294118	0.0588235	exonic	ZDHHC24	nonsynonymous SNV	P+K-	PK	0.02303	0.06405
11_66331458	rs572846	A	G	0.333333	0.416667	0.166667	exonic	CTSF	synonymous SNV	P+K-	PK	0.0367	0.1187
11_66333598	rs545009	C	T	0.333333	0.416667	0.166667	exonic	CTSF	synonymous SNV	P+K-	PK	0.0367	0.1187
11_66358126	rs486584	C	T	0.694444	0.5	0.777778	exonic	CCDC87	synonymous SNV	P-K+	PK	0.02631	0.1187
11_67572698	rs7129283	G	T	0.805556	0.722222	0.944444	ncRNA_exonic	FAM86C2P	0	P-K+	PK	0.02383	0.1348
11_67758895	rs7932	G	C	0.0833333	0.0555556	0.25	UTR3	UNC93B1	0	P-K+	PK	0.0457	0.1065
11_73711477	rs15763	A	G	0.464286	0.791667	1	UTR3	UCP3	0	P-K+	PK	0.01344	0.01463
11_75852533	rs59400584	G	A	0	0.147059	0	UTR3	UVRAG	0	P+K-	PK	0.02299	0.1145
11_75855064	rs17134603	A	G	0	0.194444	0	UTR3	UVRAG	0	P+K-	PK	0.01333	0.04989
11_85436500	rs580459	T	C	0.470588	0.382353	0.676471	intronic	SYTL2	0	P-K+	PK	0.02803	0.04873
11_94607347	rs61065260	G	C	0.111111	0.25	0.0555556	UTR3	AMOTL1	0	P+K-	PK	0.0457	0.1514
11_94609358	rs57092786	C	A	0.09375	0.264706	0.0588235	UTR3	AMOTL1	0	P+K-	PK	0.04458	0.08159
11_101832590	rs11225089	C	A	0.0277778	0.264706	0.0555556	exonic	CEP126	nonsynonymous SNV	P+K-	PK	0.02186	0.08024
11_101832608	rs11225090	T	C	0.0277778	0.25	0.0625	exonic	CEP126	nonsynonymous SNV	P+K-	PK	0.04928	0.08024
11_101870500	rs4754032	A	G	0.0294118	0.264706	0.0588235	UTR3	CEP126	0	P+K-	PK	0.04458	0.08024
11_107663103	rs516091	C	G	0.472222	0.138889	0.382353	UTR3	SLC35F2	0	P-K+	PK	0.02847	0.07907
11_108018716	rs2280332	A	C	0.470588	0.0833333	0.4375	UTR3	ACAT1	0	P-K+	PK	0.001501	0.06416
11_108378207	rs4643041	T	G	0.25	0.0833333	0.305556	UTR3	EXPH5	0	P-K+	PK	0.03457	0.07949
11_108379981	rs3741060	A	G	0.222222	0.0833333	0.305556	UTR3	EXPH5	0	P-K+	PK	0.03457	0.07949
11_108422872	rs10890859	A	G	0.166667	0.0555556	0.277778	UTR5	EXPH5	0	P-K+	PK	0.02383	0.0847
11_110333608	rs1042288	G	A	0.138889	0.222222	0.0294118	UTR3	FDX1	0	P+K-	PK	0.02813	0.05527
11_110334180	rs2044174	T	C	0.166667	0.222222	0.0277778	UTR3	FDX1	0	P+K-	PK	0.02781	0.0847
11_111164651	rs11213821	T	C	0.4375	0.5	0.25	UTR3	COLCA1	0	P+K-	PK	0.04509	0.05028
11_111164724	rs45615536	G	T	0.0882353	0.205882	0	UTR3	COLCA1	0	P+K-	PK	0.01123	0.02511
11_111169110	rs10244	A	T	0.0833333	0.166667	0	UTR5	COLCA1	0	P+K-	PK	0.02493	0.1065
11_114441327	rs1517683	T	A	0.21875	0.0357143	0.3	UTR3	NXPE4	0	P-K+	PK	0.01248	0.06628
11_114441595	rs1850521	G	T	0.15625	0.1	0.409091	UTR3	NXPE4	0	P-K+	PK	0.0175	0.03661
11_117789242	rs3802870	C	G	0.194444	0.277778	0.0555556	exonic	TMPRSS13	synonymous SNV	P+K-	PK	0.02383	0.0847
11_117800033	rs35251396	G	A	0.0555556	0.0555556	0.277778	UTR5	TMPRSS13	0	P-K+	PK	0.02383	0.0847
11_117800083	rs10892196	T	C	0.527778	0.4375	0.694444	UTR5	TMPRSS13	0	P-K+	PK	0.04916	0.08438
11_119205830	rs12795576	A	G	0.25	0.444444	0.194444	UTR5	RNF26	0	P+K-	PK	0.04198	0.1073
11_120187971	rs2282537	G	A	0.305556	0.111111	0.416667	exonic	POU2F3	nonsynonymous SNV	P-K+	PK	0.006554	0.06404
11_120198093	rs1893261	G	A	0.5	0.305556	0.611111	exonic	TMEM136	synonymous SNV	P-K+	PK	0.01739	0.05771
11_122682111	rs1996841	G	A	0.166667	0.111111	0.352941	UTR3	UBASH3B	0	P-K+	PK	0.02259	0.0352
11_122830251	rs1057703	T	G	0.194444	0.25	0.0277778	UTR3	C11orf63	0	P+K-	PK	0.01359	0.1113
11_123502821	rs41497645	A	G	0.0555556	0.176471	0	UTR3	SCN3B	0	P+K-	PK	0.01026	0.1071
11_123596055	rs10904	C	T	0.194444	0.111111	0.333333	UTR3	ZNF202	0	P-K+	PK	0.0451	0.07949
11_123753686	rs1054041	G	A	0.428571	0.21875	0.5	UTR3	TMEM225	0	P-K+	PK	0.03039	0.03361
11_128787036	rs2846675	C	T	0.972222	0.764706	0.970588	UTR3	KCNJ5	0	P-K+	PK	0.02718	0.1065
11_128787430	rs2604204	G	T	0.75	0.527778	0.78125	UTR3	KCNJ5	0	P-K+	PK	0.042	0.04833
11_128787554	rs7925056	C	T	1	0.5	1	UTR3	KCNJ5	0	P-K+	PK	7.446e-05	0.007966
11_128805814	rs6590359	C	A	0.6	0.653846	0.25	UTR3	TP53AIP1	0	P+K-	PK	0.008643	0.01216
11_133786993	rs3802921	T	C	0.194444	0.0833333	0.305556	intronic	IGSF9B	0	P-K+	PK	0.03457	0.07949
11_133787001	rs3802920	G	T	0.194444	0.0833333	0.305556	intronic	IGSF9B	0	P-K+	PK	0.03457	0.07949
11_133787549	rs3741104	T	C	0.194444	0.0555556	0.25	intronic	IGSF9B	0	P-K+	PK	0.0457	0.0632
12_87997	rs370212444	T	C	0.277778	0.441176	0.1875	ncRNA_exonic	LOC100288778	0	P+K-	PK	0.03569	0.1187
12_89710	.	G	A	0.0714286	0	0.153846	ncRNA_exonic	LOC100288778	0	P-K+	PK	0.04727	0.112
12_90596	rs377679421	C	T	0	0	0.166667	ncRNA_exonic	LOC100288778	0	P-K+	PK	0.01869	0.05339
12_274647	rs4980859	T	C	0.25	0.194444	0.444444	exonic	IQSEC3	synonymous SNV	P-K+	PK	0.04198	0.1073
12_2936049	rs3814250	C	T	0.166667	0.125	0.352941	UTR3	NRIP2	0	P-K+	PK	0.04432	0.08065
12_3394098	rs537938	T	C	0.305556	0.25	0.555556	UTR3	TSPAN9	0	P-K+	PK	0.01558	0.08497
12_3749874	rs7138453	T	C	0.611111	0.666667	0.388889	intronic	CRACR2A	0	P+K-	PK	0.0329	0.09779
12_6572191	rs12964	T	C	0.638889	0.388889	0.666667	UTR3	VAMP1	0	P-K+	PK	0.0329	0.05611
12_7247156	rs3168379	T	C	0.0384615	0.28125	0	UTR3	C1RL	0	P+K-	PK	0.002927	0.02627
12_7249598	rs3742089	T	C	0.444444	0.333333	0.611111	exonic	C1RL	nonsynonymous SNV	P-K+	PK	0.0329	0.05851
12_7869817	rs200786984	A	T	0.166667	0	0.176471	UTR3	DPPA3	0	P-K+	PK	0.01026	0.1065
12_8542940	rs4268577	A	C	0.441176	0.638889	0.34375	ncRNA_exonic	LINC00937	0	P+K-	PK	0.02803	0.08785
12_8543088	rs4366557	C	T	0.2	0.6	0.1875	ncRNA_exonic	LINC00937	0	P+K-	PK	0.001514	0.04702
12_8686433	rs10841845	A	G	0.444444	0.222222	0.5	UTR3	CLEC4E	0	P-K+	PK	0.02631	0.04661
12_9303296	rs10842971	A	T	0.235294	0.382353	0.0277778	exonic	PZP	nonsynonymous SNV	P+K-	PK	0.0001997	0.06405
12_9305473	rs10771357	T	C	0.555556	0.555556	0.833333	exonic	PZP	synonymous SNV	P-K+	PK	0.02018	0.04661
12_9462984	rs12317441	A	G	0.527778	0.527778	0.222222	ncRNA_exonic	LOC642846	0	P+K-	PK	0.01419	0.09353
12_9750669	rs1135816	A	G	0.4375	0.676471	0.375	exonic	KLRB1	nonsynonymous SNV	P+K-	PK	0.02563	0.03863
12_9905271	rs17806015	A	G	0.0882353	0	0.147059	UTR3	CD69	0	P-K+	PK	0.02299	0.05571
12_10313448	rs11053646	C	G	0.138889	0.416667	0.138889	exonic	OLR1	nonsynonymous SNV	P+K-	PK	0.01664	0.06404
12_10343011	rs10431295	G	A	0.388889	0.176471	0.472222	UTR3	TMEM52B	0	P-K+	PK	0.01118	0.07208
12_10532326	rs2255336	T	C	0.944444	1	0.833333	exonic	KLRC4-KLRK1;KLRK1	nonsynonymous SNV	P+K-	PK	0.02493	0.1145
12_10573094	rs2682491	C	G	0.392857	0.441176	0.166667	exonic	KLRC3	nonsynonymous SNV	P+K-	PK	0.0184	0.04903
12_10583355	rs72475444	C	T	0.0833333	0.0769231	0.444444	UTR3	KLRC2	0	P-K+	PK	0.008399	0.02234
12_10959031	rs1548803	C	T	0.555556	0.470588	0.777778	exonic	TAS2R8	synonymous SNV	P-K+	PK	0.01281	0.05256
12_10962115	rs3741845	A	G	0.583333	0.441176	0.794118	exonic	TAS2R9	nonsynonymous SNV	P-K+	PK	0.005548	0.03241
12_11418954	rs1896551	A	G	0.916667	1	0.833333	UTR3	PRB3	0	P+K-	PK	0.02493	0.1065
12_14958488	rs67267692	G	A	0.0555556	0.0588235	0.25	UTR3	SMCO3	0	P-K+	PK	0.04626	0.08024
12_14976553	rs17761825	G	C	0.0277778	0	0.2	exonic	C12orf60	synonymous SNV	P-K+	PK	0.009659	0.06233
12_22814036	rs4963793	A	G	0.166667	0.323529	0.111111	exonic	ETNK1	synonymous SNV	P+K-	PK	0.04203	0.0457
12_25361074	rs7973623	G	A	0.166667	0.305556	0.0882353	UTR3	KRAS	0	P+K-	PK	0.0352	0.07517
12_26217567	rs1495660	T	C	0.222222	0.111111	0.333333	exonic	RASSF8	synonymous SNV	P-K+	PK	0.0451	0.07949
12_26488505	rs9442	G	A	0.21875	0.40625	0.03125	UTR3	ITPR2	0	P+K-	PK	0.0004843	0.04432
12_26490090	rs8311	A	C	0.764706	0.555556	0.888889	UTR3	ITPR2	0	P-K+	PK	0.003191	0.034
12_26490155	rs4654	C	T	0.764706	0.527778	0.882353	UTR3	ITPR2	0	P-K+	PK	0.001589	0.03707
12_26491838	rs2570	G	A	0.735294	0.555556	0.9375	UTR3	ITPR2	0	P-K+	PK	0.0003383	0.04203
12_27124655	rs15556	A	G	0.25	0	0.305556	UTR3	TM7SF3	0	P-K+	PK	0.0003976	0.0632
12_27124784	rs9699	T	C	0.264706	0	0.277778	UTR3	TM7SF3	0	P-K+	PK	0.0009481	0.05943
12_27181513	rs8628	T	G	0.361111	0	0.25	UTR3	MED21	0	P-K+	PK	0.001831	0.04458
12_27234200	rs708165	T	C	0.444444	0.0833333	0.294118	exonic	C12orf71	synonymous SNV	P-K+	PK	0.032	0.05152
12_27235381	rs708168	G	A	0.388889	0	0.294118	exonic	C12orf71	synonymous SNV	P-K+	PK	0.0003305	0.0451
12_27654898	rs61731840	C	T	0.0833333	0.25	0	exonic	SMCO2	synonymous SNV	P+K-	PK	0.001423	0.08024
12_30888001	rs12146709	T	C	0.305556	0.305556	0.0555556	exonic	CAPRIN2	nonsynonymous SNV	P+K-	PK	0.01201	0.07949
12_31146874	rs35071	G	A	0.527778	0.638889	0.333333	UTR3	TSPAN11	0	P+K-	PK	0.01776	0.09779
12_31147475	rs1009290	G	T	0.25	0.138889	0.388889	UTR3	TSPAN11	0	P-K+	PK	0.03086	0.1727
12_34175301	rs12372721	C	T	0.352941	0.416667	0.176471	UTR5	ALG10	0	P+K-	PK	0.03783	0.06701
12_40152438	rs4583047	C	T	1	1	0.857143	UTR3	SLC2A13	0	P+K-	PK	0.0367	0.09745
12_42478628	rs76054362	T	C	0.138889	0.264706	0.0588235	UTR3	GXYLT1	0	P+K-	PK	0.04458	0.1113
12_42478630	rs74852645	T	G	0.194444	0.25	0.0588235	UTR3	GXYLT1	0	P+K-	PK	0.04626	0.08543
12_46578155	rs3742059	A	C	0.84375	0.705882	0.928571	UTR3	SLC38A1	0	P-K+	PK	0.0498	0.06649
12_47469799	rs35416930	C	T	0.352941	0.111111	0.375	UTR3	AMIGO2	0	P-K+	PK	0.02016	0.05709
12_47470997	rs34535517	G	T	0.285714	0.0714286	0.307692	UTR3	AMIGO2	0	P-K+	PK	0.03661	0.05549
12_48151822	rs11168230	C	G	0.333333	0.472222	0.222222	exonic	RAPGEF3	nonsynonymous SNV	P+K-	PK	0.04661	0.07907
12_48541757	rs8804	A	G	0.0294118	0.133333	0	UTR3	ASB8	0	P+K-	PK	0.04913	0.1136
12_50352116	rs1077520	A	C	0.4	0	0.291667	ncRNA_intronic	LOC101927318	0	P-K+	PK	0.009401	0.02219
12_50476158	rs706794	G	T	0.472222	0.764706	0.5	UTR3	ASIC1	0	P+K-	PK	0.02755	0.05886
12_50727811	rs6580742	C	T	0.166667	0.0555556	0.25	exonic	FAM186A	nonsynonymous SNV	P-K+	PK	0.0457	0.1113
12_51381718	rs224446	C	T	0.222222	0.323529	0.1	UTR3	SLC11A2	0	P+K-	PK	0.0378	0.06757
12_52681416	rs7300801	T	C	0.5	0.472222	0.222222	exonic	KRT81	synonymous SNV	P+K-	PK	0.04661	0.09353
12_52681437	rs3187034	A	G	0.5	0.472222	0.222222	exonic	KRT81	synonymous SNV	P+K-	PK	0.04661	0.09353
12_52827608	rs2232387	C	T	0.0833333	0.194444	0	exonic	KRT75	nonsynonymous SNV	P+K-	PK	0.01133	0.1065
12_52827786	rs2232385	C	T	0.0833333	0.194444	0	exonic	KRT75	synonymous SNV	P+K-	PK	0.01133	0.1065
12_53205757	rs7959052	T	C	0.0555556	0.0277778	0.25	exonic	KRT4	nonsynonymous SNV	P-K+	PK	0.01359	0.05527
12_54575800	rs2233921	C	A	0.444444	0.472222	0.222222	UTR3	SMUG1	0	P+K-	PK	0.04661	0.08497
12_54651471	rs1140681	A	G	0.444444	0.5	0.777778	UTR5	CBX5	0	P-K+	PK	0.02631	0.09619
12_57637593	rs3204635	G	A	0.472222	0.583333	0.305556	UTR3	STAC3	0	P+K-	PK	0.03205	0.1528
12_57870155	rs11544238	A	C	0.444444	0.305556	0.611111	exonic	ARHGAP9	nonsynonymous SNV	P-K+	PK	0.01739	0.1528
12_62585735	rs10877808	G	C	0.0833333	0	0.147059	UTR5	FAM19A2	0	P-K+	PK	0.02299	0.05414
12_62860717	rs78282415	G	A	0.111111	0.0277778	0.277778	UTR5	MON2	0	P-K+	PK	0.006453	0.0457
12_62926398	rs7957417	G	A	0.305556	0.235294	0.5	exonic	MON2	synonymous SNV	P-K+	PK	0.02755	0.02873
12_62928633	rs10219555	G	A	0.277778	0.222222	0.5	exonic	MON2	nonsynonymous SNV	P-K+	PK	0.02631	0.04198
12_62986620	rs12357	G	A	0.235294	0.176471	0.472222	UTR3	MON2	0	P-K+	PK	0.01118	0.02344
12_62990871	rs7963657	C	A	0.264706	0.147059	0.5	UTR3	MON2	0	P-K+	PK	0.004508	0.02705
12_62997180	rs10877887	T	C	0.305556	0.222222	0.588235	ncRNA_exonic	LINC01465	0	P-K+	PK	0.003105	0.02826
12_66358347	rs1042725	C	T	0.694444	0.527778	0.794118	UTR3	HMGA2	0	P-K+	PK	0.02445	0.08047
12_68708761	rs2306393	C	T	0.59375	0.764706	0.464286	exonic	MDM1	nonsynonymous SNV	P+K-	PK	0.01903	0.03303
12_70965764	rs1561799	G	A	0.138889	0.294118	0.0833333	exonic	PTPRB	synonymous SNV	P+K-	PK	0.032	0.06405
12_70990054	rs2465811	T	C	0.222222	0.176471	0.416667	exonic	PTPRB	nonsynonymous SNV	P-K+	PK	0.03783	0.06021
12_74933868	rs5002508	T	G	0	0.194444	0	UTR3	ATXN7L3B	0	P+K-	PK	0.01133	0.1145
12_74934162	rs1389488	C	T	0	0.166667	0	UTR3	ATXN7L3B	0	P+K-	PK	0.02493	0.1145
12_78598891	rs9971904	G	A	0.805556	0.852941	0.59375	exonic	NAV3	synonymous SNV	P+K-	PK	0.02667	0.07718
12_85432040	rs7312075	T	A	0.0555556	0.0294118	0.266667	exonic	LRRIQ1	nonsynonymous SNV	P-K+	PK	0.00965	0.05184
12_91444397	rs7973611	G	A	0.133333	0	0.133333	UTR3	KERA	0	P-K+	PK	0.04913	0.0583
12_91449990	rs2735333	C	T	0.705882	0.9	0.633333	exonic	KERA	synonymous SNV	P+K-	PK	0.03034	0.03509
12_91451941	rs1990548	T	G	0.214286	0	0.233333	UTR5	KERA	0	P-K+	PK	0.00414	0.05342
12_95911217	rs67699211	T	C	0.111111	0.294118	0.0833333	UTR3	USP44	0	P+K-	PK	0.032	0.1113
12_97346505	rs7980370	A	G	0	0.235294	0	UTR3	NEDD1	0	P+K-	PK	0.004992	0.06275
12_98908812	rs11768	T	G	0.583333	0.388889	0.694444	ncRNA_exonic	TMPO-AS1	0	P-K+	PK	0.01739	0.09779
12_101755809	rs12309241	T	C	0.194444	0.277778	0.0555556	exonic	UTP20	synonymous SNV	P+K-	PK	0.02383	0.0847
12_104152943	rs2271638	C	T	0.0555556	0.0277778	0.205882	exonic	STAB2	synonymous SNV	P-K+	PK	0.02564	0.1065
12_104153006	rs2271636	G	T	0.0555556	0.0277778	0.25	exonic	STAB2	synonymous SNV	P-K+	PK	0.01359	0.1065
12_106740540	rs2252929	A	G	1	0.733333	0.9375	UTR3	TCP11L2	0	P-K+	PK	0.03996	0.04913
12_107713511	rs961498	G	C	0.136364	0	0.346154	exonic	BTBD11	nonsynonymous SNV	P-K+	PK	0.002989	0.03533
12_108052435	rs2241183	A	G	0.205882	0.333333	0.117647	UTR3	BTBD11	0	P+K-	PK	0.046	0.07517
12_108985976	rs112073168	G	A	0	0.142857	0	exonic	TMEM119	nonsynonymous SNV	P+K-	PK	0.04826	0.09573
12_109304690	rs7294679	T	A	0.805556	0.694444	0.9375	UTR3	SVOP	0	P-K+	PK	0.01371	0.04458
12_109524152	rs74456627	A	T	0.0555556	0	0.166667	UTR3	USP30	0	P-K+	PK	0.02202	0.06233
12_114255320	rs7312601	C	T	0.388889	0.611111	0.323529	UTR3	RBM19	0	P+K-	PK	0.01879	0.03408
12_114260240	rs60738585	C	T	0.166667	0.25	0.0277778	UTR3	RBM19	0	P+K-	PK	0.01359	0.1514
12_114843606	rs12423887	C	T	0.333333	0.333333	0.0555556	UTR5	TBX5	0	P+K-	PK	0.00586	0.1552
12_116446445	rs3741768	C	T	0.117647	0.305556	0.0882353	exonic	MED13L	synonymous SNV	P+K-	PK	0.0352	0.09827
12_117582617	rs1060233	G	T	0.0294118	0	0.125	UTR3	FBXO21	0	P-K+	PK	0.04416	0.09897
12_122459863	rs1678962	T	A	0.0625	0	0.25	UTR5	BCL7A	0	P-K+	PK	0.009054	0.06876
12_124144395	rs1051793	A	G	0.555556	0.277778	0.583333	exonic	GTF2H3	synonymous SNV	P-K+	PK	0.01666	0.09779
12_124209332	rs1139789	T	C	0.5	0.676471	0.382353	exonic	ATP6V0A2	synonymous SNV	P+K-	PK	0.02803	0.09655
12_124243707	rs10744162	T	C	0.285714	0.625	0.321429	UTR3	ATP6V0A2	0	P+K-	PK	0.04998	0.05862
12_124246004	rs2333834	G	A	0.411765	0.647059	0.352941	UTR3	ATP6V0A2	0	P+K-	PK	0.02832	0.05146
12_124821413	rs2230944	G	A	0.0555556	0.194444	0	exonic	NCOR2	nonsynonymous SNV	P+K-	PK	0.01133	0.1065
12_124821416	rs2227277	C	T	0.0555556	0.194444	0	exonic	NCOR2	nonsynonymous SNV	P+K-	PK	0.01133	0.1065
12_128900005	rs1683723	G	A	0.666667	0.852941	0.611111	exonic	TMEM132C	nonsynonymous SNV	P+K-	PK	0.03174	0.04203
12_129297860	rs11059930	T	C	0.138889	0.0555556	0.235294	intronic	SLC15A4	0	P-K+	PK	0.04263	0.05571
12_129559557	rs10773594	C	T	0.714286	0.791667	0.357143	exonic	TMEM132D	synonymous SNV	P+K-	PK	0.002217	0.02638
12_131620588	rs868158	A	G	0.666667	0.888889	0.555556	exonic	ADGRD1	synonymous SNV	P+K-	PK	0.003191	0.07208
12_133682655	rs710945	A	G	0.583333	0.472222	0.777778	exonic	ZNF140	synonymous SNV	P-K+	PK	0.01419	0.08979
12_133683261	rs905226	T	C	0.53125	0.411765	0.705882	UTR3	ZNF140	0	P-K+	PK	0.02717	0.07874
12_133683280	rs905225	A	T	0.5	0.470588	0.78125	UTR3	ZNF140	0	P-K+	PK	0.01191	0.0437
12_133782033	rs150579525	C	T	0.8	0.676471	0.382353	UTR3	ZNF268	0	P+K-	PK	0.02803	0.04296
13_19435924	rs3864960	T	G	0.0588235	0.235294	0.0555556	ncRNA_intronic	ANKRD20A9P	0	P+K-	PK	0.04263	0.08024
13_21562832	rs2770928	C	T	0.944444	0.916667	0.694444	exonic	LATS2	nonsynonymous SNV	P+K-	PK	0.03457	0.1113
13_21562948	rs558614	G	A	0.805556	0.823529	0.529412	exonic	LATS2	nonsynonymous SNV	P+K-	PK	0.01859	0.09573
13_21720956	rs4620	C	T	0.305556	0.527778	0.235294	exonic	SAP18	synonymous SNV	P+K-	PK	0.01504	0.03066
13_21722557	rs3088071	A	G	0.208333	0.458333	0.0416667	UTR3	SAP18	0	P+K-	PK	0.001797	0.01373
13_21728483	rs1327178	C	T	0.305556	0.416667	0.147059	UTR3	SKA3	0	P+K-	PK	0.01725	0.07392
13_21728945	rs9506624	G	A	0.138889	0.0277778	0.222222	UTR3	SKA3	0	P-K+	PK	0.02781	0.1065
13_24234517	rs3751364	A	G	0.583333	0.833333	0.583333	exonic	TNFRSF19	synonymous SNV	P+K-	PK	0.0367	0.05371
13_24243200	rs3751363	T	C	0.75	0.861111	0.617647	exonic	TNFRSF19	synonymous SNV	P+K-	PK	0.02847	0.06021
13_24876752	rs33990382	T	C	0.382353	0.472222	0.176471	exonic	SPATA13	synonymous SNV	P+K-	PK	0.01118	0.07742
13_24877151	rs9580929	A	G	0.388889	0.472222	0.222222	UTR3	SPATA13	0	P+K-	PK	0.04661	0.1435
13_24877179	rs9578699	G	A	0.416667	0.470588	0.194444	UTR3	SPATA13	0	P+K-	PK	0.02145	0.08758
13_24877308	rs9578700	A	G	0.416667	0.472222	0.222222	UTR3	SPATA13	0	P+K-	PK	0.04661	0.1368
13_24877550	rs9580931	G	C	0.416667	0.472222	0.222222	UTR3	SPATA13	0	P+K-	PK	0.04661	0.1368
13_26619959	rs9507640	G	A	0.117647	0.25	0	UTR3	SHISA2	0	P+K-	PK	0.003066	0.05079
13_26788114	rs301047	A	G	0.222222	0.0277778	0.277778	exonic	RNF6	synonymous SNV	P-K+	PK	0.006453	0.0457
13_28962757	rs9551465	A	T	0.470588	0.323529	0.611111	UTR3	FLT1	0	P-K+	PK	0.01879	0.05487
13_36857639	rs1998800	T	C	0.305556	0.411765	0.166667	exonic	CCDC169	synonymous SNV	P+K-	PK	0.034	0.05619
13_36877978	rs1054141	T	C	0.28125	0.411765	0.166667	UTR3	SPG20	0	P+K-	PK	0.034	0.04903
13_36920918	rs9531842	C	G	0.294118	0.444444	0.1875	ncRNA_intronic	SPG20-AS1	0	P+K-	PK	0.03707	0.03903
13_43639845	rs3783044	A	C	0.333333	0.233333	0.588235	exonic	DNAJC15	synonymous SNV	P-K+	PK	0.005487	0.04475
13_47408851	rs3125	C	G	0.0588235	0.166667	0	UTR3	HTR2A	0	P+K-	PK	0.02607	0.05571
13_50067098	rs9568224	A	G	0.0333333	0	0.166667	UTR3	SETDB2	0	P-K+	PK	0.02202	0.06233
13_52343391	rs10676	C	T	0.1	0.0625	0.285714	exonic	DHRS12	nonsynonymous SNV	P-K+	PK	0.03483	0.05294
13_61984781	rs3829388	T	C	0.375	0.176471	0.4375	UTR3	PCDH20	0	P-K+	PK	0.03169	0.03903
13_76099804	rs9543957	T	A	0.75	0.611111	0.916667	UTR3	COMMD6	0	P-K+	PK	0.004555	0.1073
13_76195403	rs9565177	T	G	0.166667	0.352941	0.0625	ncRNA_intronic	LMO7-AS1	0	P+K-	PK	0.00571	0.07266
13_76395464	rs41286126	C	T	0.111111	0	0.166667	exonic	LMO7	nonsynonymous SNV	P-K+	PK	0.02493	0.1514
13_78188078	rs8002725	A	G	0.117647	0.361111	0.117647	exonic	SCEL	nonsynonymous SNV	P+K-	PK	0.02528	0.0451
13_78216873	rs1053985	A	G	0.428571	0.3125	0.583333	exonic	SCEL	synonymous SNV	P-K+	PK	0.03059	0.04916
13_79174091	rs9601092	T	A	0.294118	0.138889	0.4375	ncRNA_intronic	RNF219-AS1	0	P-K+	PK	0.007654	0.0317
13_79174187	rs41288262	T	C	0.117647	0	0.166667	ncRNA_intronic	RNF219-AS1	0	P-K+	PK	0.02511	0.05184
13_103400083	rs1026158	G	A	0.527778	0.705882	0.416667	exonic	CCDC168	synonymous SNV	P+K-	PK	0.01787	0.09281
13_103400729	rs12583104	G	A	0.75	0.90625	0.642857	exonic	CCDC168	nonsynonymous SNV	P+K-	PK	0.02558	0.04551
13_103698363	rs2301157	A	G	0.5	0.8	0.5	UTR3	SLC10A2	0	P+K-	PK	0.02478	0.02625
13_110408608	rs1865434	C	T	0.888889	0.722222	0.970588	UTR3	IRS2	0	P-K+	PK	0.006585	0.0847
13_111158874	rs445348	A	G	0.777778	0.583333	0.833333	exonic	COL4A2	synonymous SNV	P-K+	PK	0.0367	0.055
13_113052388	rs2296895	A	G	0.583333	0.583333	0.833333	exonic	SPACA7	synonymous SNV	P-K+	PK	0.0367	0.07907
13_113053470	rs10816	T	A	0.611111	0.611111	0.861111	exonic	SPACA7	nonsynonymous SNV	P-K+	PK	0.03086	0.07907
13_114110660	rs14067	A	G	0.361111	0.444444	0.194444	UTR3	DCUN1D2	0	P+K-	PK	0.04198	0.07907
13_114175032	rs2260335	G	A	0.111111	0.25	0.0555556	exonic	TMCO3	nonsynonymous SNV	P+K-	PK	0.0457	0.1514
13_114524944	rs7400002	A	G	0.416667	0.46875	0.733333	exonic	GAS6	synonymous SNV	P-K+	PK	0.04152	0.04671
13_114622597	rs9604529	A	G	0.15625	0	0.166667	exonic	LINC00452	nonsynonymous SNV	P-K+	PK	0.02202	0.1054
13_115002305	rs8002514	G	A	0.25	0.472222	0.222222	exonic	CDC16	synonymous SNV	P+K-	PK	0.04661	0.08497
14_20502120	rs17277032	C	T	0.277778	0.305556	0.0555556	exonic	OR4K13	synonymous SNV	P+K-	PK	0.01201	0.0457
14_20665790	rs4981822	T	A	0.416667	0.388889	0.676471	exonic	OR11G2	nonsynonymous SNV	P-K+	PK	0.01879	0.05771
14_20665840	rs4981088	G	A	0.416667	0.388889	0.694444	exonic	OR11G2	nonsynonymous SNV	P-K+	PK	0.01739	0.05851
14_23569360	rs8007589	A	G	0.705882	0.666667	0.928571	UTR3	C14orf119	0	P-K+	PK	0.0217	0.02272
14_24572812	rs35618680	G	A	0.166667	0.0555556	0.277778	exonic	PCK2	nonsynonymous SNV	P-K+	PK	0.02383	0.1348
14_34271414	rs1055762	T	C	0.147059	0.21875	0.0294118	UTR3	NPAS3	0	P+K-	PK	0.02492	0.08024
14_37149172	rs1884216	C	A	0.5	0.617647	0.323529	UTR3	SLC25A21	0	P+K-	PK	0.02803	0.0482
14_39652219	rs2737721	T	C	0.333333	0.323529	0.111111	UTR3	PNN	0	P+K-	PK	0.04203	0.055
14_39716808	rs3825549	T	C	0.205882	0.264706	0.0555556	exonic	MIA2	nonsynonymous SNV	P+K-	PK	0.02186	0.09827
14_39871017	rs7156962	T	C	0.138889	0.305556	0.0833333	exonic	FBXO33	synonymous SNV	P+K-	PK	0.03457	0.1348
14_39901580	rs28568594	C	G	0.138889	0.305556	0.0833333	UTR5	FBXO33	0	P+K-	PK	0.03457	0.1348
14_47309879	rs12879453	A	G	0.178571	0.633333	0.3	UTR3	MDGA2	0	P+K-	PK	0.0191	0.03078
14_51411248	rs67490748	T	C	0.0882353	0	0.178571	UTR5	PYGL	0	P-K+	PK	0.01519	0.05819
14_52898383	rs11623681	C	A	0	0.3125	0	UTR3	TXNDC16	0	P+K-	PK	0.008702	0.0842
14_53345378	rs2357947	G	A	0.861111	0.764706	0.944444	exonic	FERMT2	synonymous SNV	P-K+	PK	0.04263	0.05571
14_57671215	rs7157608	T	C	0	0.25	0	UTR3	EXOC5	0	P+K-	PK	0.02234	0.04483
14_60754455	rs17256080	G	A	0.0555556	0	0.147059	UTR3	PPM1A	0	P-K+	PK	0.02299	0.05414
14_61745225	rs76584614	A	G	0	0.147059	0	UTR3	TMEM30B	0	P+K-	PK	0.02299	0.1093
14_65401695	rs6745	C	A	0.25	0.0882353	0.416667	UTR3	CHURC1	0	P-K+	PK	0.002261	0.06404
14_68042574	rs11158685	A	G	0.555556	0.388889	0.694444	exonic	PLEKHH1	nonsynonymous SNV	P-K+	PK	0.01739	0.09619
14_68066971	rs12587848	G	C	0.0714286	0.0625	0.321429	UTR5	PIGH	0	P-K+	PK	0.01693	0.05294
14_68234539	rs3742883	T	C	0.944444	1	0.833333	exonic	ZFYVE26	nonsynonymous SNV	P+K-	PK	0.02493	0.1065
14_69799806	rs2274440	C	T	0.166667	0.0277778	0.222222	exonic	GALNT16	synonymous SNV	P-K+	PK	0.02781	0.1065
14_70834310	.	G	A	0.0416667	0	0.153846	UTR3	SYNJ2BP	0	P-K+	PK	0.04727	0.1149
14_71577898	rs7146777	C	G	0.111111	0.333333	0.0294118	UTR3	PCNX1	0	P+K-	PK	0.001381	0.02423
14_71579648	rs7158548	C	T	0.147059	0.25	0.0294118	UTR3	PCNX1	0	P+K-	PK	0.01184	0.04137
14_75745626	rs7101	C	T	0.555556	0.805556	0.472222	UTR5	FOS	0	P+K-	PK	0.006403	0.07907
14_76156609	rs2303345	C	T	0.647059	0.666667	0.264706	exonic	TTLL5	nonsynonymous SNV	P+K-	PK	0.0009195	0.0541
14_86089253	rs17714100	C	T	0.0277778	0	0.176471	exonic	FLRT2	synonymous SNV	P-K+	PK	0.01026	0.05414
14_86089508	rs17646495	G	T	0	0	0.166667	exonic	FLRT2	synonymous SNV	P-K+	PK	0.02511	0.1015
14_86091242	rs28364863	C	T	0	0	0.166667	UTR3	FLRT2	0	P-K+	PK	0.02511	0.09231
14_86091910	rs17121383	G	T	0	0	0.1875	UTR3	FLRT2	0	P-K+	PK	0.009974	0.08444
14_86093385	rs17094455	T	C	0.0277778	0	0.176471	UTR3	FLRT2	0	P-K+	PK	0.02457	0.05548
14_86093422	rs17094456	G	T	0	0	0.166667	UTR3	FLRT2	0	P-K+	PK	0.02493	0.1145
14_89626554	rs11159889	T	G	0.166667	0.0909091	0.45	UTR3	FOXN3	0	P-K+	PK	0.01324	0.02329
14_92084004	rs1620238	C	G	0.794118	0.944444	0.75	exonic	CATSPERB	synonymous SNV	P+K-	PK	0.03772	0.06246
14_92628878	rs58040515	G	A	0.111111	0.166667	0	UTR3	CPSF2	0	P+K-	PK	0.02493	0.1145
14_93398849	rs9658664	G	A	0.0555556	0.166667	0	exonic	CHGA	nonsynonymous SNV	P+K-	PK	0.02493	0.1145
14_93406232	rs7156335	T	C	0.0555556	0.222222	0	UTR3	ITPK1	0	P+K-	PK	0.005056	0.1065
14_93649201	rs1128801	G	C	0.264706	0.0833333	0.5	UTR3	MOAP1	0	P-K+	PK	0.003351	0.02625
14_94756794	rs941590	T	C	0.59375	0.472222	0.75	exonic	SERPINA10	nonsynonymous SNV	P-K+	PK	0.03953	0.04027
14_104199356	rs2295146	C	T	0.333333	0.444444	0.0882353	UTR3	ZFYVE21	0	P+K-	PK	0.001042	0.03086
14_105415352	rs12890949	G	C	0.705882	0.692308	0.961538	exonic	AHNAK2	nonsynonymous SNV	P-K+	PK	0.02378	0.04271
14_105415422	rs79003030	G	A	0.25	0.307692	0.0384615	exonic	AHNAK2	synonymous SNV	P+K-	PK	0.02378	0.04709
14_105415608	rs11850848	G	C	0.366667	0.5	0.166667	exonic	AHNAK2	nonsynonymous SNV	P+K-	PK	0.02684	0.04558
14_105415659	rs61271499	G	A	0.266667	0.333333	0.0416667	exonic	AHNAK2	synonymous SNV	P+K-	PK	0.02261	0.03756
14_105767174	rs185057150	G	C	0.0909091	0	0.2	UTR5	BRF1;PACS2	0	P-K+	PK	0.04329	0.04483
15_22382821	rs12438969	G	C	0.125	0.0833333	0.294118	exonic	OR4N4	nonsynonymous SNV	P-K+	PK	0.032	0.1113
15_22382828	rs62006709	C	A	0.125	0.0833333	0.294118	exonic	OR4N4	nonsynonymous SNV	P-K+	PK	0.032	0.1113
15_23201566	rs201716755	C	A	0.527778	0.305556	0.583333	ncRNA_exonic	WHAMMP3	0	P-K+	PK	0.03205	0.09832
15_29413373	rs57806000	G	A	0.0833333	0	0.176471	UTR3	FAM189A1	0	P-K+	PK	0.01026	0.08024
15_31668694	rs11537748	A	G	0.305556	0.555556	0.277778	UTR3	KLF13	0	P+K-	PK	0.03066	0.05371
15_32907712	rs73369102	C	T	0.166667	0.25	0.0555556	UTR5	ARHGAP11A	0	P+K-	PK	0.0457	0.1113
15_34015013	rs2293027	G	A	0.111111	0.333333	0.111111	exonic	RYR3	synonymous SNV	P+K-	PK	0.0451	0.1113
15_35082225	rs1370154	C	T	0.323529	0.470588	0.222222	ncRNA_intronic	LOC101928174	0	P+K-	PK	0.04346	0.06104
15_38614525	rs7182445	G	A	0.78125	0.941176	0.59375	exonic	SPRED1	synonymous SNV	P+K-	PK	0.0009609	0.04008
15_38643574	rs3751526	T	C	0.777778	0.944444	0.617647	exonic	SPRED1	synonymous SNV	P+K-	PK	0.001069	0.05152
15_38645589	rs1554527	A	C	0.166667	0.0588235	0.277778	UTR3	SPRED1	0	P-K+	PK	0.02423	0.05571
15_38647861	rs72725364	G	A	0.194444	0.0555556	0.25	UTR3	SPRED1	0	P-K+	PK	0.03772	0.06405
15_38648527	rs10852019	T	A	0.75	0.966667	0.6	UTR3	SPRED1	0	P+K-	PK	0.001051	0.03309
15_38648975	rs8026118	C	T	0.794118	0.911765	0.6	UTR3	SPRED1	0	P+K-	PK	0.006502	0.0234
15_39910404	rs12908846	G	A	0.214286	0.233333	0	exonic	FSIP1	nonsynonymous SNV	P+K-	PK	0.01161	0.03661
15_39910431	rs10152640	A	G	0.227273	0.25	0	exonic	FSIP1	nonsynonymous SNV	P+K-	PK	0.02456	0.03228
15_42041712	rs2695163	G	A	0.647059	0.583333	0.833333	exonic	MGA	synonymous SNV	P-K+	PK	0.0367	0.07208
15_42302433	rs9920802	A	G	0.583333	0.416667	0.722222	intronic	PLA2G4E	0	P-K+	PK	0.01666	0.09619
15_42302437	rs9920824	G	C	0.583333	0.416667	0.722222	intronic	PLA2G4E	0	P-K+	PK	0.01666	0.09619
15_42503350	rs1045120	C	T	0.0294118	0.264706	0.0555556	UTR3	TMEM87A	0	P+K-	PK	0.02186	0.08024
15_43236612	rs7178567	C	T	0.766667	0.733333	0.958333	UTR3	UBR1	0	P-K+	PK	0.0335	0.06634
15_43237203	rs3803341	T	C	0.805556	0.764706	0.970588	UTR3	UBR1	0	P-K+	PK	0.02718	0.05943
15_43531411	rs28756768	G	C	0.222222	0.222222	0.0277778	exonic	TGM5	nonsynonymous SNV	P+K-	PK	0.02781	0.0847
15_45459971	rs74011381	C	G	0.235294	0.333333	0.0882353	UTR3	SHF	0	P+K-	PK	0.01867	0.06859
15_45493122	rs74011388	C	T	0.222222	0.305556	0.0833333	UTR5	SHF	0	P+K-	PK	0.03457	0.1348
15_45554267	rs1060896	C	A	0.333333	0.441176	0.705882	exonic	SLC28A2	nonsynonymous SNV	P-K+	PK	0.04896	0.06084
15_45567871	rs2458225	T	C	0.352941	0.40625	0.75	ncRNA_intronic	LOC101928414	0	P-K+	PK	0.01074	0.03919
15_45654327	rs1145086	A	G	0.727273	0.535714	0.214286	exonic	GATM	synonymous SNV	P+K-	PK	0.02611	0.02746
15_49429410	rs17473148	A	G	0.205882	0.0882353	0.323529	exonic	COPS2	synonymous SNV	P-K+	PK	0.03331	0.06151
15_52101385	rs17611193	T	C	0.214286	0.205882	0.535714	UTR3	TMOD2	0	P-K+	PK	0.008764	0.03039
15_55632859	rs678892	G	T	0.5	0.617647	0.333333	exonic	PIGB	nonsynonymous SNV	P+K-	PK	0.03038	0.0541
15_55904727	rs530798	G	A	0.28125	0.09375	0.423077	UTR3	PRTG	0	P-K+	PK	0.005221	0.04262
15_59280119	rs55671218	T	C	0.138889	0.0555556	0.235294	UTR5	RNF111	0	P-K+	PK	0.04263	0.0847
15_60715643	rs3068	C	T	0.794118	0.676471	0.911765	UTR3	ICE2	0	P-K+	PK	0.03331	0.1022
15_60715800	rs1046657	T	G	0.764706	0.647059	0.882353	UTR3	ICE2	0	P-K+	PK	0.04332	0.05264
15_63901113	rs1131647	A	G	0.3125	0.138889	0.392857	UTR3	HERC1	0	P-K+	PK	0.03961	0.04999
15_65621138	rs11853777	G	A	0.75	0.888889	0.638889	UTR3	IGDCC3	0	P+K-	PK	0.02463	0.07949
15_67358478	rs1061427	G	A	0.277778	0.555556	0.25	UTR5	SMAD3	0	P+K-	PK	0.01558	0.05371
15_69019582	rs1128848	G	C	0.4	0.5	0.166667	UTR3	CORO2B	0	P+K-	PK	0.007456	0.03585
15_69238445	rs3743093	G	A	0.264706	0.294118	0.617647	exonic	SPESP1	nonsynonymous SNV	P-K+	PK	0.01428	0.07515
15_76029226	rs3991252	G	A	0.0555556	0.25	0	ncRNA_intronic	DNM1P35	0	P+K-	PK	0.002212	0.1514
15_76029269	rs199786499	G	A	0.0555556	0.222222	0.0277778	ncRNA_intronic	DNM1P35	0	P+K-	PK	0.02781	0.1514
15_76029298	rs2405896	T	C	0.0555556	0.222222	0.0277778	ncRNA_intronic	DNM1P35	0	P+K-	PK	0.02781	0.1514
15_78462518	rs3087998	C	T	0.361111	0.0555556	0.25	UTR3	IDH3A	0	P-K+	PK	0.0457	0.055
15_78791061	rs3743079	C	T	0.222222	0.25	0.0277778	UTR3	IREB2	0	P+K-	PK	0.01359	0.0847
15_78793109	rs16969906	T	C	0.205882	0.222222	0.0277778	UTR3	IREB2	0	P+K-	PK	0.02781	0.05943
15_80886191	rs8033706	T	C	0.638889	0.611111	0.852941	UTR3	ARNT2	0	P-K+	PK	0.03174	0.06021
15_80886772	rs7178743	T	A	0.25	0.138889	0.416667	UTR3	ARNT2	0	P-K+	PK	0.01664	0.09423
15_80887431	rs4301984	C	T	0.277778	0.09375	0.333333	UTR3	ARNT2	0	P-K+	PK	0.02103	0.0352
15_80888783	rs6495511	A	G	0.333333	0.323529	0.583333	UTR3	ARNT2	0	P-K+	PK	0.03408	0.05611
15_80889350	rs4778610	C	G	0.25	0.138889	0.416667	UTR3	ARNT2	0	P-K+	PK	0.01664	0.09423
15_81604871	rs3726	T	C	0.277778	0.194444	0.444444	UTR3	IL16	0	P-K+	PK	0.04198	0.1073
15_83499665	rs3814282	G	A	0.208333	0.0357143	0.323529	exonic	WHAMM	synonymous SNV	P-K+	PK	0.007722	0.01329
15_83499766	rs3814281	G	A	0.277778	0.166667	0.416667	exonic	WHAMM	nonsynonymous SNV	P-K+	PK	0.0367	0.055
15_86122779	rs2061822	T	C	0.5	0.472222	0.75	exonic	AKAP13	nonsynonymous SNV	P-K+	PK	0.02873	0.05771
15_86123019	rs2061824	C	T	0.527778	0.472222	0.75	exonic	AKAP13	nonsynonymous SNV	P-K+	PK	0.02873	0.08497
15_86123924	rs4075255	C	T	0.527778	0.472222	0.764706	exonic	AKAP13	synonymous SNV	P-K+	PK	0.01504	0.0561
15_86123988	rs4075254	G	A	0.527778	0.472222	0.764706	exonic	AKAP13	nonsynonymous SNV	P-K+	PK	0.01504	0.0561
15_86124419	rs4843073	C	T	0.527778	0.5	0.764706	exonic	AKAP13	synonymous SNV	P-K+	PK	0.02755	0.05771
15_86125304	rs7179919	C	T	0.333333	0.277778	0.0555556	exonic	AKAP13	synonymous SNV	P+K-	PK	0.02383	0.09423
15_89400023	rs12899191	A	G	0.235294	0.0666667	0.411765	exonic	ACAN	nonsynonymous SNV	P-K+	PK	0.001536	0.03401
15_91525197	rs2301826	C	T	0.5	0.5625	0.21875	exonic	PRC1	synonymous SNV	P+K-	PK	0.009735	0.05367
15_92715131	rs2270061	A	T	0.416667	0.277778	0.555556	UTR3	SLCO3A1	0	P-K+	PK	0.03066	0.05371
15_92715167	rs2270060	C	T	0.416667	0.277778	0.555556	UTR3	SLCO3A1	0	P-K+	PK	0.03066	0.05371
15_100255013	rs12902459	C	A	0.6	0.625	0.3	UTR3	MEF2A	0	P+K-	PK	0.03957	0.05462
15_100255021	rs148429386	C	A	0.15625	0.3125	0.0588235	UTR3	MEF2A	0	P+K-	PK	0.01026	0.03634
15_100255046	rs325383	A	G	0.25	0.392857	0.111111	UTR3	MEF2A	0	P+K-	PK	0.01563	0.0327
15_100889405	rs4965641	G	C	0.433333	0.444444	0.1875	ncRNA_exonic	SPATA41	0	P+K-	PK	0.03707	0.04509
15_101189896	rs2279594	C	T	0.694444	0.861111	0.611111	UTR3	ASB7	0	P+K-	PK	0.03086	0.04198
15_102516734	rs200346477	C	T	0.1875	0.1	0.428571	ncRNA_exonic	WASH3P	0	P-K+	PK	0.006404	0.1362
16_128176	rs76079375	C	T	0.235294	0.323529	0.0769231	UTR5	MPG	0	P+K-	PK	0.02799	0.03696
16_450309	rs5841	C	T	0.333333	0.555556	0.277778	exonic	NME4	synonymous SNV	P+K-	PK	0.03066	0.07907
16_615326	rs59985111	T	C	0.666667	0.638889	0.888889	UTR3	PRR35	0	P-K+	PK	0.02463	0.1187
16_686337	rs117667029	G	A	0.0625	0.0454545	0.3	UTR5	METTL26	0	P-K+	PK	0.0408	0.1238
16_1261219	rs2753326	A	G	0.529412	0.666667	0.388889	exonic	CACNA1H	synonymous SNV	P+K-	PK	0.0329	0.05487
16_1261222	rs2753325	A	G	0.529412	0.666667	0.388889	exonic	CACNA1H	synonymous SNV	P+K-	PK	0.0329	0.05487
16_1268494	rs2745136	C	T	0.5	0.666667	0.388889	exonic	CACNA1H	synonymous SNV	P+K-	PK	0.0329	0.05851
16_1269029	rs2738893	T	C	0.5	0.666667	0.388889	exonic	CACNA1H	synonymous SNV	P+K-	PK	0.0329	0.05851
16_1270162	rs1054645	G	A	0.5	0.666667	0.388889	exonic	CACNA1H	nonsynonymous SNV	P+K-	PK	0.0329	0.05851
16_1271189	rs2248457	G	A	0.5	0.676471	0.40625	UTR3	CACNA1H	0	P+K-	PK	0.04709	0.04896
16_1271890	rs1004041	G	T	0.361111	0.555556	0.277778	exonic	TPSG1	nonsynonymous SNV	P+K-	PK	0.03066	0.08497
16_1536323	rs2667671	A	G	0.166667	0.305556	0.0833333	exonic	PTX4	synonymous SNV	P+K-	PK	0.03457	0.1113
16_1536380	rs2667672	G	T	0.166667	0.305556	0.0555556	exonic	PTX4	nonsynonymous SNV	P+K-	PK	0.01201	0.1113
16_1536499	rs2745097	G	T	0.166667	0.305556	0.0833333	exonic	PTX4	nonsynonymous SNV	P+K-	PK	0.03457	0.1113
16_1536535	rs2745098	C	T	0.305556	0.472222	0.222222	exonic	PTX4	nonsynonymous SNV	P+K-	PK	0.04661	0.1285
16_1537414	rs56294663	C	T	0.111111	0.25	0.0555556	exonic	PTX4	synonymous SNV	P+K-	PK	0.0457	0.1065
16_1537693	rs61734779	C	A	0.111111	0.25	0.0555556	exonic	PTX4	nonsynonymous SNV	P+K-	PK	0.0457	0.1065
16_1538363	rs1040499	C	A	0.305556	0.472222	0.235294	exonic	PTX4	nonsynonymous SNV	P+K-	PK	0.04833	0.1187
16_1559965	rs7191986	T	C	0.0555556	0.25	0.0277778	UTR3	TELO2	0	P+K-	PK	0.01359	0.1065
16_1560194	rs1044603	G	A	0.111111	0.25	0.0555556	UTR3	TELO2	0	P+K-	PK	0.0457	0.1065
16_1574863	rs2235640	G	A	0.222222	0.222222	0.472222	exonic	IFT140	synonymous SNV	P-K+	PK	0.04661	0.07907
16_1818503	rs2076431	G	C	0.694444	0.777778	0.527778	exonic	MAPK8IP3	synonymous SNV	P+K-	PK	0.04661	0.07208
16_1820992	rs11890	T	A	0.694444	0.777778	0.527778	exonic	NME3	synonymous SNV	P+K-	PK	0.04661	0.07208
16_1836796	rs2235648	C	A	0.277778	0.472222	0.222222	exonic	NUBP2	synonymous SNV	P+K-	PK	0.04661	0.07208
16_1877698	rs3743852	C	G	0.0833333	0	0.25	exonic	FAHD1	synonymous SNV	P-K+	PK	0.002212	0.1065
16_1877913	rs13166	C	G	0.0833333	0	0.25	UTR3	FAHD1	0	P-K+	PK	0.002212	0.1065
16_1878330	rs79140651	G	A	0.0588235	0	0.21875	UTR3	FAHD1	0	P-K+	PK	0.003472	0.05805
16_1962046	rs1742399	C	T	0.666667	0.388889	0.666667	exonic	HS3ST6	nonsynonymous SNV	P-K+	PK	0.0329	0.08979
16_1962047	rs1657140	G	A	0.666667	0.361111	0.666667	exonic	HS3ST6	synonymous SNV	P-K+	PK	0.01776	0.09353
16_2891540	rs11859372	C	G	0.388889	0.305556	0.611111	ncRNA_exonic	PRSS30P	0	P-K+	PK	0.01739	0.09353
16_2892370	rs3810801	C	A	0.388889	0.277778	0.555556	ncRNA_exonic	PRSS30P	0	P-K+	PK	0.03066	0.08979
16_3000016	rs4785920	G	A	0.333333	0.416667	0.166667	UTR3	FLYWCH1	0	P+K-	PK	0.0367	0.04198
16_3019425	rs11552907	G	T	0.3	0.107143	0.5	UTR5	PAQR4	0	P-K+	PK	0.003661	0.03646
16_3640274	rs714181	G	A	0.25	0.333333	0.111111	exonic	SLX4	nonsynonymous SNV	P+K-	PK	0.0451	0.06404
16_3704597	rs17136471	G	A	0.138889	0.166667	0	UTR5	DNASE1	0	P+K-	PK	0.02493	0.05527
16_3704738	rs45479597	G	A	0.138889	0.166667	0	UTR5	DNASE1	0	P+K-	PK	0.02493	0.05527
16_3707747	rs1053874	G	A	0.5	0.527778	0.222222	exonic	DNASE1	nonsynonymous SNV	P+K-	PK	0.01419	0.05611
16_3724352	rs11541712	G	A	0.111111	0.166667	0	exonic	TRAP1	synonymous SNV	P+K-	PK	0.02493	0.05527
16_3778427	rs55960450	T	C	0.0833333	0.166667	0	exonic	CREBBP	synonymous SNV	P+K-	PK	0.04614	0.06923
16_3779060	rs181646656	G	A	0.111111	0.194444	0	exonic	CREBBP	synonymous SNV	P+K-	PK	0.01133	0.05527
16_5068586	rs2270257	T	C	0.133333	0.3125	0.0357143	UTR3	SEC14L5	0	P+K-	PK	0.006935	0.02808
16_5075633	rs7188856	G	A	0.111111	0.25	0.0588235	exonic	NAGPA	nonsynonymous SNV	P+K-	PK	0.04626	0.05943
16_5094706	rs11642955	A	G	0.2	0.0555556	0.65	exonic	C16orf89	nonsynonymous SNV	P-K+	PK	0.0001664	0.03539
16_5097947	rs1127920	A	G	0.25	0.305556	0.0588235	exonic	C16orf89	nonsynonymous SNV	P+K-	PK	0.01228	0.08065
16_11770304	rs2270370	G	C	0.0555556	0	0.147059	UTR3	SNN	0	P-K+	PK	0.02299	0.05414
16_19726275	rs11640454	C	T	0.0555556	0.166667	0	exonic	KNOP1	nonsynonymous SNV	P+K-	PK	0.02493	0.1065
16_20966362	rs34051490	T	C	0.0666667	0	0.178571	exonic	DNAH3	nonsynonymous SNV	P-K+	PK	0.018	0.04313
16_21416094	rs144101135	G	A	0	0	0.153846	exonic	NPIPB3	unknown	P-K+	PK	0.0407	0.0938
16_27799517	rs733682	C	G	0.111111	0.25	0.0277778	UTR3	GSG1L	0	P+K-	PK	0.01359	0.0847
16_27799740	rs733683	C	T	0.111111	0.277778	0.0277778	UTR3	GSG1L	0	P+K-	PK	0.006453	0.0847
16_27802337	rs2292646	C	T	0.0833333	0.235294	0	UTR3	GSG1L	0	P+K-	PK	0.004992	0.07284
16_28515228	rs17855750	A	C	0.0833333	0	0.147059	exonic	IL27	nonsynonymous SNV	P-K+	PK	0.02299	0.1071
16_30346692	rs146098127	A	G	0.138889	0.166667	0.428571	ncRNA_exonic	SMG1P5	0	P-K+	PK	0.04319	0.04969
16_31771943	rs8047481	G	T	0.818182	1	0.75	UTR3	ZNF720	0	P+K-	PK	0.006611	0.01635
16_31771944	rs62054709	C	A	0.818182	1	0.75	UTR3	ZNF720	0	P+K-	PK	0.006611	0.01635
16_31771953	rs8049351	A	G	0.708333	1	0.708333	UTR3	ZNF720	0	P+K-	PK	0.002587	0.01799
16_50668426	rs12913	T	C	0.444444	0.666667	0.388889	UTR3	NKD1	0	P+K-	PK	0.0329	0.05851
16_54320197	rs3751723	G	T	0.416667	0.222222	0.571429	UTR5	IRX3	0	P-K+	PK	0.008548	0.04475
16_55618667	rs16955473	A	G	0.0294118	0	0.125	UTR3	LPCAT2	0	P-K+	PK	0.04416	0.1142
16_55798644	rs80178194	C	G	0.590909	0.666667	0.25	ncRNA_exonic	CES1P1	0	P+K-	PK	0.006485	0.00965
16_55798671	rs73549916	G	A	0.733333	0.821429	0.34375	ncRNA_exonic	CES1P1	0	P+K-	PK	0.0002456	0.01512
16_55798733	rs78337607	G	C	0.766667	0.84375	0.3125	ncRNA_exonic	CES1P1	0	P+K-	PK	3.32e-05	0.01191
16_55806311	rs28538364	G	T	0.472222	0.529412	0.25	ncRNA_exonic	CES1P1	0	P+K-	PK	0.02519	0.02577
16_55806409	rs28366434	T	C	0.805556	0.852941	0.375	ncRNA_exonic	CES1P1	0	P+K-	PK	0.0001005	0.0151
16_55807448	rs149224370	C	T	0.75	0.807692	0.416667	ncRNA_exonic	CES1P1	0	P+K-	PK	0.008036	0.01236
16_55807754	rs28444264	A	G	0.730769	0.821429	0.458333	ncRNA_exonic	CES1P1	0	P+K-	PK	0.008782	0.01643
16_55807839	rs28547176	A	C	0.916667	1	0.65625	ncRNA_exonic	CES1P1	0	P+K-	PK	0.0001201	0.02718
16_55808037	rs3743789	C	T	0.805556	0.852941	0.411765	ncRNA_exonic	CES1P1	0	P+K-	PK	0.0003278	0.0151
16_55808193	rs3743790	A	C	0.805556	0.852941	0.375	ncRNA_exonic	CES1P1	0	P+K-	PK	0.0001005	0.0151
16_55808364	rs28628572	G	A	0.777778	0.852941	0.375	ncRNA_exonic	CES1P1	0	P+K-	PK	0.0001005	0.01681
16_55808539	rs28393348	C	A	0.75	0.8	0.3125	ncRNA_exonic	CES1P1	0	P+K-	PK	0.0001383	0.01497
16_57060724	rs13339199	G	A	0.0277778	0	0.166667	exonic	NLRC5	synonymous SNV	P-K+	PK	0.02493	0.1145
16_57673460	rs3760061	A	G	0.269231	0.115385	0.538462	UTR5	ADGRG1	0	P-K+	PK	0.00253	0.03083
16_68294800	rs7672	C	G	0.666667	0.861111	0.555556	UTR3	PLA2G15	0	P+K-	PK	0.008624	0.06404
16_69782855	rs3811348	C	T	0.388889	0.472222	0.222222	exonic	NOB1	nonsynonymous SNV	P+K-	PK	0.04661	0.05054
16_75204902	rs7199871	A	G	0.0277778	0.176471	0	UTR3	ZFP1	0	P+K-	PK	0.02478	0.1139
16_75205141	rs7205215	T	C	0.0294118	0.166667	0	UTR3	ZFP1	0	P+K-	PK	0.02607	0.11
16_75327916	rs6624	A	G	0.916667	0.9375	0.714286	exonic	CFDP1	synonymous SNV	P+K-	PK	0.03483	0.03718
16_78458915	rs75559202	C	G	0.0833333	0.25	0.0555556	exonic	WWOX	nonsynonymous SNV	P+K-	PK	0.0457	0.1065
16_81819768	rs1143685	T	C	0.676471	0.638889	0.875	exonic	PLCG2	synonymous SNV	P-K+	PK	0.02873	0.06554
16_84940980	rs2641670	G	A	0.333333	0.166667	0.416667	UTR3	CRISPLD2	0	P-K+	PK	0.0367	0.06404
16_84941064	rs2646108	G	A	0.25	0.0833333	0.305556	UTR3	CRISPLD2	0	P-K+	PK	0.03457	0.0632
16_85009970	rs7195377	A	G	0.555556	0.555556	0.833333	exonic	ZDHHC7	synonymous SNV	P-K+	PK	0.02018	0.05054
16_85045103	rs2270845	G	A	0.0555556	0	0.272727	UTR5	ZDHHC7	0	P-K+	PK	0.02428	0.04145
16_85122275	rs55711779	C	T	0.25	0.111111	0.333333	UTR3	KIAA0513	0	P-K+	PK	0.0451	0.06404
16_85123762	rs3751756	T	G	0.555556	0.611111	0.861111	UTR3	KIAA0513	0	P-K+	PK	0.03086	0.08497
16_85124402	rs62049928	G	A	0.25	0.111111	0.361111	UTR3	KIAA0513	0	P-K+	PK	0.02463	0.055
16_85124765	rs62049929	T	C	0.222222	0.111111	0.361111	UTR3	KIAA0513	0	P-K+	PK	0.02463	0.055
16_85126460	rs16975222	C	T	0.222222	0.111111	0.361111	UTR3	KIAA0513	0	P-K+	PK	0.02463	0.055
16_85141661	rs17200833	G	A	0.111111	0	0.25	exonic	FAM92B	synonymous SNV	P-K+	PK	0.001423	0.05339
16_85812955	rs59646659	T	A	0.125	0.535714	0.166667	UTR3	EMC8	0	P+K-	PK	0.005233	0.04626
16_85813231	rs8587	A	C	0.666667	0.333333	0.617647	UTR3	EMC8	0	P-K+	PK	0.03038	0.03408
16_86371824	rs2581300	T	C	0.666667	0.472222	0.735294	ncRNA_exonic	LINC00917	0	P-K+	PK	0.03022	0.05256
16_87678144	rs918368	T	C	0.694444	0.777778	0.470588	exonic	JPH3	synonymous SNV	P+K-	PK	0.01281	0.04833
16_87864269	rs16943300	G	A	0.0833333	0.352941	0.0833333	UTR3	SLC7A5	0	P+K-	PK	0.008292	0.0352
16_87864475	rs1060266	G	C	0.222222	0.166667	0.444444	UTR3	SLC7A5	0	P-K+	PK	0.02018	0.07208
16_88498221	rs4782300	C	T	0.777778	0.944444	0.638889	exonic	ZNF469	nonsynonymous SNV	P+K-	PK	0.002766	0.07949
16_88499539	rs9931465	C	G	0.805556	0.944444	0.694444	exonic	ZNF469	synonymous SNV	P+K-	PK	0.01201	0.0847
16_88500430	rs12919507	G	T	0.194444	0.0555556	0.277778	exonic	ZNF469	synonymous SNV	P-K+	PK	0.02383	0.1113
16_88501386	rs141218390	C	A	0.25	0.0555556	0.25	exonic	ZNF469	nonsynonymous SNV	P-K+	PK	0.0457	0.1113
16_88741504	rs1056707	G	C	0.735294	0.588235	0.833333	ncRNA_exonic	SNAI3-AS1	0	P-K+	PK	0.034	0.04766
16_89864833	rs17226033	G	A	0.0555556	0	0.166667	UTR3	FANCA	0	P-K+	PK	0.02493	0.1145
17_416906	rs9896825	C	G	0.0769231	0.133333	0	UTR3	VPS53	0	P+K-	PK	0.04913	0.1129
17_904983	rs9737	C	T	0.194444	0.235294	0.0555556	UTR3	TIMM22	0	P+K-	PK	0.04263	0.0632
17_907907	rs3744753	G	A	0.138889	0.25	0.0555556	UTR3	ABR	0	P+K-	PK	0.0457	0.1113
17_1608065	rs8080982	C	T	0.0277778	0.205882	0	UTR3	TLCD2	0	P+K-	PK	0.004488	0.05527
17_1609029	rs7223247	T	G	0.694444	0.75	0.472222	UTR3	TLCD2	0	P+K-	PK	0.02873	0.07907
17_1609787	rs4790806	C	T	0.305556	0.382353	0.138889	UTR3	TLCD2	0	P+K-	PK	0.02847	0.046
17_1609788	rs4790807	G	A	0.305556	0.382353	0.138889	UTR3	TLCD2	0	P+K-	PK	0.02847	0.046
17_2318695	rs4790335	G	A	0.794118	0.941176	0.678571	ncRNA_exonic	LOC284009	0	P+K-	PK	0.01633	0.04014
17_2320175	rs12452567	A	G	0.166667	0.277778	0.0277778	UTR3	METTL16	0	P+K-	PK	0.006453	0.1113
17_3486702	rs224534	G	A	0.333333	0.277778	0.555556	exonic	TRPV1	nonsynonymous SNV	P-K+	PK	0.03066	0.08979
17_3564218	rs1048646	T	C	0.111111	0.361111	0.117647	UTR3	CTNS	0	P+K-	PK	0.02528	0.09573
17_3977532	rs34760976	G	A	0.0833333	0.0555556	0.235294	exonic	ZZEF1	synonymous SNV	P-K+	PK	0.04263	0.05527
17_4574751	rs9436	T	A	0.0833333	0	0.166667	exonic	PELP1	nonsynonymous SNV	P-K+	PK	0.02493	0.1514
17_4576620	rs55677157	C	T	0.0833333	0	0.166667	exonic	PELP1	synonymous SNV	P-K+	PK	0.02493	0.1514
17_5346446	rs77195858	C	T	0.375	0.5	0.178571	UTR3	DHX33	0	P+K-	PK	0.009509	0.06512
17_5347576	rs2074438	G	A	0.305556	0.444444	0.166667	exonic	DHX33	synonymous SNV	P+K-	PK	0.02018	0.1073
17_5393461	rs1805467	T	C	0.305556	0.222222	0.5	UTR3	MIS12	0	P-K+	PK	0.02631	0.07907
17_5394090	rs73973808	G	T	0.0588235	0.0277778	0.205882	UTR3	MIS12	0	P-K+	PK	0.02564	0.05805
17_7681412	rs7359662	C	G	0.861111	0.944444	0.75	exonic	DNAH2	synonymous SNV	P+K-	PK	0.0457	0.1113
17_9801324	rs887259	C	T	0.138889	0.25	0.0588235	UTR3	RCVRN	0	P+K-	PK	0.04626	0.0847
17_10614673	rs445928	G	A	0.307692	0.205882	0.472222	UTR3	ADPRM	0	P-K+	PK	0.02445	0.03903
17_10614867	rs379403	C	T	0.333333	0.222222	0.470588	UTR3	ADPRM	0	P-K+	PK	0.04346	0.04833
17_10614869	rs387022	G	T	0.333333	0.222222	0.470588	UTR3	ADPRM	0	P-K+	PK	0.04346	0.04833
17_10616766	rs617655	G	C	0.388889	0.194444	0.470588	UTR3	TMEM220	0	P-K+	PK	0.02145	0.05054
17_10616910	rs368500	T	C	0.352941	0.176471	0.5	UTR3	TMEM220	0	P-K+	PK	0.01299	0.03811
17_10617234	rs411511	G	A	0.388889	0.194444	0.5	UTR3	TMEM220	0	P-K+	PK	0.01253	0.05371
17_10617281	rs375437	A	G	0.333333	0.166667	0.470588	UTR3	TMEM220	0	P-K+	PK	0.009535	0.05054
17_10617730	rs374034	A	G	0.3125	0.166667	0.423077	UTR3	TMEM220	0	P-K+	PK	0.04226	0.04624
17_10617803	rs440655	G	T	0.361111	0.194444	0.472222	UTR3	TMEM220	0	P-K+	PK	0.02344	0.05054
17_10618220	rs376174	T	C	0.3125	0.194444	0.461538	UTR3	TMEM220	0	P-K+	PK	0.02967	0.05257
17_10618227	rs455104	G	A	0.28125	0.166667	0.423077	UTR3	TMEM220	0	P-K+	PK	0.04226	0.04245
17_10633181	rs3826448	A	G	0.382353	0.264706	0.529412	ncRNA_exonic	TMEM220-AS1	0	P-K+	PK	0.04647	0.05256
17_10633358	rs202311	C	T	0.361111	0.194444	0.558824	ncRNA_intronic	TMEM220-AS1	0	P-K+	PK	0.002699	0.05054
17_12877530	rs1109767	C	T	0.03125	0.125	0	exonic	ARHGAP44	synonymous SNV	P+K-	PK	0.04989	0.09745
17_13927849	rs200545546	T	C	0.138889	0.0555556	0.323529	ncRNA_exonic	CDRT15P1	0	P-K+	PK	0.005178	0.06405
17_13927856	rs201680053	T	C	0.138889	0.0833333	0.382353	ncRNA_exonic	CDRT15P1	0	P-K+	PK	0.003991	0.0632
17_13927886	rs11649821	G	A	0.166667	0.222222	0.0277778	ncRNA_exonic	CDRT15P1	0	P+K-	PK	0.02781	0.1514
17_13928124	rs199806452	A	G	0.222222	0.166667	0.416667	ncRNA_exonic	CDRT15P1	0	P-K+	PK	0.0367	0.1073
17_14248423	rs9906855	T	C	0.611111	0.805556	0.472222	exonic	HS3ST3B1	synonymous SNV	P+K-	PK	0.006403	0.05054
17_14249167	rs3785655	C	T	0.611111	0.805556	0.558824	UTR3	HS3ST3B1	0	P+K-	PK	0.03903	0.04339
17_15492426	rs28445278	C	T	0.555556	0.40625	0.794118	exonic	CDRT1	nonsynonymous SNV	P-K+	PK	0.002225	0.05043
17_15621217	rs9905520	C	T	0.416667	0.277778	0.5625	UTR3	ZNF286A	0	P-K+	PK	0.02609	0.08515
17_15621553	rs4054360	C	T	0.90625	0.633333	0.964286	UTR3	ZNF286A	0	P-K+	PK	0.002569	0.02901
17_17140297	rs1708629	G	A	0.366667	0.5	0.1875	UTR5	FLCN	0	P+K-	PK	0.01418	0.03189
17_17696531	rs3803763	G	C	0.777778	0.852941	0.59375	exonic	RAI1	nonsynonymous SNV	P+K-	PK	0.02667	0.05139
17_17750907	rs7501812	G	A	0.25	0.111111	0.333333	UTR3	TOM1L2	0	P-K+	PK	0.0451	0.1348
17_17896090	rs4368210	C	T	0.75	0.861111	0.617647	exonic	DRC3	synonymous SNV	P+K-	PK	0.02847	0.1022
17_17911014	rs12150369	G	A	0.75	0.888889	0.666667	UTR3	DRC3	0	P+K-	PK	0.0451	0.1348
17_17948475	rs2955355	G	A	0.25	0.0882353	0.333333	exonic	GID4	synonymous SNV	P-K+	PK	0.01867	0.1022
17_17997209	rs2230316	G	A	0.222222	0.0294118	0.333333	exonic	DRG2	synonymous SNV	P-K+	PK	0.001381	0.09423
17_18024266	rs2955367	T	G	0.735294	0.911765	0.566667	exonic	MYO15A	nonsynonymous SNV	P+K-	PK	0.003003	0.05667
17_18326023	rs497994	T	C	0.0833333	0.333333	0.0833333	ncRNA_exonic	KRT17P5	0	P+K-	PK	0.01824	0.1113
17_18880268	rs2472715	C	A	0.111111	0.277778	0	exonic	SLC5A10	synonymous SNV	P+K-	PK	0.0009481	0.1065
17_19641321	rs1042183	C	T	0.305556	0.444444	0.111111	UTR3	ALDH3A1	0	P+K-	PK	0.003191	0.1187
17_19644472	rs2072330	A	T	0.305556	0.472222	0.138889	exonic	ALDH3A1	synonymous SNV	P+K-	PK	0.00429	0.1187
17_20406015	.	G	C	0	0	0.428571	ncRNA_exonic	KRT16P3	0	P-K+	PK	0.0004186	0.006611
17_20768038	rs75911309	G	T	0	0	0.194444	UTR3	CCDC144NL	0	P-K+	PK	0.01133	0.1145
17_20903080	rs1045162	C	A	0.222222	0.0555556	0.277778	UTR3	USP22	0	P-K+	PK	0.02383	0.0847
17_21323074	rs73981249	T	C	0.125	0	0.35	UTR3	KCNJ12	0	P-K+	PK	0.01066	0.02876
17_26089867	rs1060826	T	C	0.722222	0.694444	0.916667	exonic	NOS2	synonymous SNV	P-K+	PK	0.03457	0.1348
17_26092631	rs1060822	A	G	0.722222	0.694444	0.944444	exonic	NOS2	synonymous SNV	P-K+	PK	0.01201	0.1348
17_29110508	rs9910234	G	A	0.111111	0	0.388889	ncRNA_intronic	SUZ12P1	0	P-K+	PK	0.002522	0.0157
17_33337411	rs1859248	G	A	0.15625	0.28125	0.0666667	ncRNA_exonic	RAD51L3-RFFL	0	P+K-	PK	0.04403	0.04521
17_33338447	rs16970540	C	T	0.222222	0.294118	0.0833333	ncRNA_exonic	RAD51L3-RFFL	0	P+K-	PK	0.032	0.0451
17_33593024	rs2291190	T	C	0.0277778	0.194444	0	UTR3	SLFN5	0	P+K-	PK	0.01208	0.05571
17_34493099	.	A	G	0.269231	0.208333	0.576923	intergenic	CCL4;CCL3L3	0	P-K+	PK	0.01039	0.05167
17_34493102	.	T	C	0.269231	0.192308	0.576923	intergenic	CCL4;CCL3L3	0	P-K+	PK	0.009465	0.04962
17_34493108	rs374151894	T	G	0.291667	0.208333	0.607143	intergenic	CCL4;CCL3L3	0	P-K+	PK	0.005105	0.04832
17_34493194	rs373836904	T	C	0.464286	0.4	0.678571	intergenic	CCL4;CCL3L3	0	P-K+	PK	0.03977	0.09939
17_34854280	rs2306590	G	A	0.444444	0.5	0.194444	exonic	MYO19	nonsynonymous SNV	P+K-	PK	0.01253	0.07208
17_34869155	rs8882	G	A	0.416667	0.277778	0.555556	UTR3	MYO19	0	P-K+	PK	0.03066	0.05371
17_34900836	rs3736166	G	C	0.361111	0.25	0.527778	UTR5	GGNBP2	0	P-K+	PK	0.02873	0.08497
17_34900847	rs3736167	A	C	0.444444	0.527778	0.194444	UTR5	GGNBP2	0	P+K-	PK	0.006403	0.08497
17_34942595	rs1106908	G	A	0.472222	0.558824	0.222222	exonic	GGNBP2	synonymous SNV	P+K-	PK	0.006469	0.05026
17_36046931	rs2688	G	T	0.53125	0.8125	0.357143	UTR3	HNF1B	0	P+K-	PK	0.0005124	0.06404
17_36047101	rs2689	T	A	0.333333	0.722222	0.361111	UTR3	HNF1B	0	P+K-	PK	0.004198	0.05851
17_36202897	rs77208842	T	C	0.214286	0.363636	0.0714286	ncRNA_exonic	YWHAEP7	0	P+K-	PK	0.01446	0.09197
17_36830562	rs79676758	G	C	0.194444	0.0555556	0.305556	exonic	EPOP	nonsynonymous SNV	P-K+	PK	0.01201	0.0632
17_37026236	rs8076153	C	T	0	0.294118	0.0588235	UTR5	LASP1	0	P+K-	PK	0.02303	0.02981
17_38350583	rs45567834	G	A	0.0294118	0	0.142857	UTR3	RAPGEFL1	0	P-K+	PK	0.04826	0.08662
17_39135207	rs150812789	A	G	0.333333	0.138889	0.388889	exonic	KRT40	nonsynonymous SNV	P-K+	PK	0.03086	0.06404
17_39197176	rs3815561	G	A	0.194444	0.0833333	0.333333	exonic	KRTAP1-1	synonymous SNV	P-K+	PK	0.01824	0.09423
17_39197499	rs3213755	G	A	0.166667	0.0833333	0.333333	exonic	KRTAP1-1	stopgain	P-K+	PK	0.01824	0.1348
17_39202927	rs6503577	T	A	0.194444	0.111111	0.333333	UTR3	KRTAP2-1	0	P-K+	PK	0.0451	0.07949
17_39203455	rs9635728	G	C	0.166667	0.0555556	0.28125	exonic	KRTAP2-1	nonsynonymous SNV	P-K+	PK	0.01882	0.06405
17_39550018	rs2269820	C	G	0.861111	0.764706	0.944444	UTR3	KRT31	0	P-K+	PK	0.04263	0.05943
17_39633317	rs2239711	A	G	0.805556	0.75	0.944444	exonic	KRT35	synonymous SNV	P-K+	PK	0.0457	0.1113
17_39633349	rs2071601	G	C	0.388889	0.444444	0.805556	exonic	KRT35	nonsynonymous SNV	P-K+	PK	0.003124	0.05851
17_39634625	rs7216017	A	G	0.388889	0.444444	0.823529	exonic	KRT35	synonymous SNV	P-K+	PK	0.001312	0.05611
17_39637244	rs743686	A	G	0.388889	0.444444	0.805556	exonic	KRT35	nonsynonymous SNV	P-K+	PK	0.003124	0.05851
17_39642561	rs2071602	T	A	0.416667	0.333333	0.111111	UTR3	KRT36	0	P+K-	PK	0.0451	0.055
17_39643646	rs2301354	G	A	0.388889	0.472222	0.833333	exonic	KRT36	nonsynonymous SNV	P-K+	PK	0.002602	0.05771
17_41623670	rs3765174	C	T	0.222222	0.264706	0.0294118	UTR5	ETV4	0	P+K-	PK	0.01317	0.04203
17_43111688	rs9900173	G	A	0.305556	0.361111	0.111111	exonic	DCAKD	synonymous SNV	P+K-	PK	0.02463	0.06404
17_43226887	rs12051846	A	G	0.388889	0.388889	0.138889	exonic	HEXIM1	synonymous SNV	P+K-	PK	0.03086	0.07208
17_43679698	rs367811852	A	G	0.222222	0.222222	0.0294118	upstream	MAPK8IP1P2	0	P+K-	PK	0.02813	0.1113
17_45786452	rs4794057	C	T	0.25	0.666667	0.0555556	exonic	TBKBP1	synonymous SNV	P+K-	PK	0.0002966	0.01659
17_45884846	rs1008934	G	C	0.777778	0.944444	0.75	UTR3	OSBPL7	0	P+K-	PK	0.0457	0.0847
17_45885687	rs9907142	A	G	0.777778	0.944444	0.694444	exonic	OSBPL7	synonymous SNV	P+K-	PK	0.01201	0.07949
17_47132506	rs373334425	A	T	0.25	0.09375	0.458333	UTR3	IGF2BP1	0	P-K+	PK	0.003896	0.05243
17_47371065	rs2286015	A	G	0.318182	0.227273	0	UTR3	ZNF652	0	P+K-	PK	0.01921	0.03533
17_54925336	rs61751970	T	A	0	0	0.194444	exonic	DGKE	synonymous SNV	P-K+	PK	0.01133	0.1145
17_55951037	rs17762338	C	T	0.0833333	0.25	0.0555556	exonic	CUEDC1	nonsynonymous SNV	P+K-	PK	0.0457	0.0847
17_57477235	rs1451508	T	G	0.392857	0.307692	0.666667	UTR3	YPEL2	0	P-K+	PK	0.02248	0.02258
17_57477616	rs758379	G	A	0.527778	0.555556	0.805556	UTR3	YPEL2	0	P-K+	PK	0.04198	0.08979
17_59969000	rs753765	T	C	0.28125	0.361111	0.1	exonic	INTS2	synonymous SNV	P+K-	PK	0.02017	0.03804
17_60741917	rs2014055	G	A	0.194444	0	0.166667	exonic	MRC2	nonsynonymous SNV	P-K+	PK	0.02493	0.1065
17_60769803	rs3826537	A	G	0.361111	0.611111	0.277778	exonic	MRC2	synonymous SNV	P+K-	PK	0.008596	0.08979
17_60814273	rs9891498	A	G	0.361111	0.444444	0.166667	exonic	40238	nonsynonymous SNV	P+K-	PK	0.02018	0.05054
17_64685078	rs2227857	G	A	0.305556	0.416667	0.166667	exonic	PRKCA	synonymous SNV	P+K-	PK	0.0367	0.1073
17_66527834	rs9925	T	C	0.333333	0.423077	0.166667	UTR3	PRKAR1A	0	P+K-	PK	0.04262	0.0733
17_71332663	rs868837	C	T	0.0833333	0.555556	0.222222	UTR3	SDK2	0	P+K-	PK	0.007305	0.07208
17_72368550	rs11658891	T	C	0.611111	0.444444	0.75	exonic	GPR142	synonymous SNV	P-K+	PK	0.01558	0.09353
17_72443192	rs2706527	G	T	0.888889	0.861111	0.59375	UTR3	GPRC5C	0	P+K-	PK	0.01529	0.04928
17_72743202	rs1054131	G	A	0.111111	0.166667	0	UTR3	RAB37	0	P+K-	PK	0.02493	0.1145
17_73059820	rs4365317	C	G	0.277778	0.472222	0.235294	UTR3	KCTD2	0	P+K-	PK	0.04833	0.08047
17_73089706	rs4789134	G	A	0.388889	0.558824	0.235294	UTR5	SLC16A5	0	P+K-	PK	0.01251	0.08465
17_73625286	rs820190	G	A	0.142857	0.272727	0.0357143	exonic	RECQL5	synonymous SNV	P+K-	PK	0.03448	0.07513
17_76353910	rs4969169	T	C	0.916667	0.833333	1	UTR3	SOCS3	0	P-K+	PK	0.02493	0.1145
17_76503678	rs59853990	C	A	0.0833333	0.0555556	0.25	exonic	DNAH17	synonymous SNV	P-K+	PK	0.0457	0.0847
17_78194257	rs117854297	C	T	0.323529	0.433333	0.71875	UTR5	SLC26A11	0	P-K+	PK	0.03863	0.04027
17_78306280	rs8074015	A	G	0.555556	0.441176	0.764706	exonic	RNF213	nonsynonymous SNV	P-K+	PK	0.01251	0.03219
17_78389478	rs35549084	G	A	0.0294118	0.0277778	0.1875	exonic	ENDOV	nonsynonymous SNV	P-K+	PK	0.04573	0.05805
17_79089590	rs4969391	A	G	0.25	0.361111	0.0555556	exonic	BAIAP2	nonsynonymous SNV	P+K-	PK	0.002766	0.06404
17_79090448	rs6565535	C	A	0.75	0.611111	0.941176	UTR3	BAIAP2	0	P-K+	PK	0.001319	0.05619
17_79091353	rs1801833	T	C	0.735294	0.638889	0.941176	UTR3	AATK	0	P-K+	PK	0.002866	0.05619
17_79095144	rs8073904	G	A	0.75	0.694444	0.916667	exonic	AATK	synonymous SNV	P-K+	PK	0.03457	0.07949
17_79974731	rs13087	T	C	0.611111	0.333333	0.722222	exonic	ASPSCR1	synonymous SNV	P-K+	PK	0.001933	0.09353
17_79981316	rs4072801	G	A	0.558824	0.294118	0.821429	UTR5	LRRC45	0	P-K+	PK	3.949e-05	0.04294
18_2909700	rs56288451	C	T	0.125	0	0.1875	exonic	EMILIN2	nonsynonymous SNV	P-K+	PK	0.009974	0.0678
18_3086065	rs3765623	C	T	0.0555556	0.147059	0	exonic	MYOM1	nonsynonymous SNV	P+K-	PK	0.02299	0.1145
18_3262193	rs11650	T	C	0.638889	0.852941	0.527778	ncRNA_exonic	LOC104968399	0	P+K-	PK	0.004534	0.04661
18_3262766	rs34603712	A	G	0.638889	0.888889	0.583333	UTR5	MYL12B	0	P+K-	PK	0.006554	0.055
18_5244771	rs1044656	T	C	0.277778	0.583333	0.294118	ncRNA_exonic	LINC00667	0	P+K-	PK	0.01787	0.04661
18_5244776	rs1044658	G	C	0.277778	0.583333	0.294118	ncRNA_exonic	LINC00667	0	P+K-	PK	0.01787	0.04661
18_5289887	rs2789	C	G	0.294118	0.558824	0.25	UTR3	ZBTB14	0	P+K-	PK	0.01342	0.04509
18_5890777	rs146496912	T	A	0.09375	0.03125	0.2	exonic	TMEM200C	nonsynonymous SNV	P-K+	PK	0.04962	0.06693
18_6999628	rs625106	T	C	0.444444	0.166667	0.416667	exonic	LAMA1	synonymous SNV	P-K+	PK	0.0367	0.07907
18_10471732	rs3748415	G	A	0.166667	0.222222	0.0277778	exonic	APCDD1	nonsynonymous SNV	P+K-	PK	0.02781	0.1065
18_10471764	rs3748414	C	T	0.166667	0.222222	0.0277778	exonic	APCDD1	synonymous SNV	P+K-	PK	0.02781	0.1065
18_10471773	rs3748413	C	G	0.166667	0.222222	0.0277778	exonic	APCDD1	synonymous SNV	P+K-	PK	0.02781	0.1065
18_10488064	rs3811368	C	T	0.166667	0.194444	0	UTR3	APCDD1	0	P+K-	PK	0.01133	0.1065
18_10488450	rs1045648	G	A	0.138889	0.176471	0	UTR3	APCDD1	0	P+K-	PK	0.01026	0.08024
18_10552472	rs9317	T	C	0.117647	0.222222	0	UTR3	NAPG	0	P+K-	PK	0.005056	0.08024
18_14132402	rs9958799	G	C	0.0555556	0.333333	0.111111	UTR5	ZNF519	0	P+K-	PK	0.0451	0.1113
18_14337724	rs12962258	G	T	0.416667	0.722222	0.388889	ncRNA_exonic	CYP4F35P	0	P+K-	PK	0.008596	0.05851
18_14338057	rs4797903	A	G	0.416667	0.694444	0.388889	ncRNA_exonic	CYP4F35P	0	P+K-	PK	0.01739	0.05851
18_14338451	rs3927191	G	C	0.361111	0.694444	0.411765	ncRNA_exonic	CYP4F35P	0	P+K-	PK	0.02958	0.03521
18_14338752	rs1984680	A	C	0.416667	0.694444	0.388889	ncRNA_exonic	CYP4F35P	0	P+K-	PK	0.01739	0.05851
18_21413869	rs9962023	T	C	0.666667	0.527778	0.805556	exonic	LAMA3	synonymous SNV	P-K+	PK	0.02344	0.07907
18_21481233	rs1154226	C	G	0.194444	0.361111	0.0833333	exonic	LAMA3	synonymous SNV	P+K-	PK	0.009279	0.09423
18_21511034	rs1154232	C	A	0.194444	0.352941	0.117647	exonic	LAMA3	nonsynonymous SNV	P+K-	PK	0.04332	0.08389
18_21594458	rs28503640	G	A	0.361111	0.5	0.138889	ncRNA_intronic	TTC39C-AS1	0	P+K-	PK	0.002046	0.055
18_21594571	rs28608904	A	C	0.409091	0.545455	0.2	ncRNA_intronic	TTC39C-AS1	0	P+K-	PK	0.01733	0.03322
18_28570548	rs2047082	A	G	0.0277778	0.0294118	0.2	UTR3	DSC3	0	P-K+	PK	0.04444	0.04989
18_28573553	rs871056	A	C	0.166667	0.0294118	0.21875	UTR3	DSC3	0	P-K+	PK	0.02492	0.04263
18_29488804	rs12326860	A	G	0.382353	0.382353	0.0882353	exonic	TRAPPC8	synonymous SNV	P+K-	PK	0.008709	0.05161
18_34802584	rs1787627	G	A	0.0555556	0.25	0.0588235	UTR3	KIAA1328	0	P+K-	PK	0.04626	0.05527
18_42456653	rs663651	G	A	0.472222	0.222222	0.5	exonic	SETBP1	nonsynonymous SNV	P-K+	PK	0.02631	0.08979
18_43252883	rs1123617	G	A	0.194444	0.111111	0.361111	exonic	SLC14A2	nonsynonymous SNV	P-K+	PK	0.02463	0.055
18_43262664	rs7244213	A	T	0.111111	0.111111	0.361111	UTR3	SLC14A2	0	P-K+	PK	0.02463	0.07949
18_43417752	rs78530686	C	G	0.428571	0.125	0.5	exonic	SIGLEC15	synonymous SNV	P-K+	PK	0.004296	0.01511
18_43427623	rs1055066	G	A	0.416667	0.111111	0.375	UTR3	EPG5	0	P-K+	PK	0.02016	0.02335
18_43497710	rs3744998	A	G	0.323529	0.558824	0.277778	exonic	EPG5	nonsynonymous SNV	P+K-	PK	0.02826	0.04319
18_47455923	rs2298628	C	T	0.472222	0.617647	0.323529	exonic	MYO5B	synonymous SNV	P+K-	PK	0.02803	0.08785
18_51060972	rs12607853	T	C	0.269231	0.15	0.545455	UTR3	DCC	0	P-K+	PK	0.01065	0.02675
18_51061399	rs16956878	T	C	0.28125	0.205882	0.583333	UTR3	DCC	0	P-K+	PK	0.001598	0.03169
18_54696444	rs3826642	C	A	0.388889	0.555556	0.277778	UTR3	WDR7	0	P+K-	PK	0.03066	0.05611
18_56148826	rs10867	C	G	0.111111	0.305556	0.0833333	UTR3	ALPK2	0	P+K-	PK	0.03457	0.1113
18_56936000	rs28774981	G	A	0.111111	0.361111	0.117647	UTR3	RAX	0	P+K-	PK	0.02528	0.0632
18_59941254	rs17069686	A	C	0.138889	0	0.176471	exonic	KIAA1468	synonymous SNV	P-K+	PK	0.01026	0.08024
18_59972872	rs1045941	G	T	0.03125	0	0.125	UTR3	KIAA1468	0	P-K+	PK	0.04416	0.1142
18_66513615	rs2187094	A	G	0.352941	0.529412	0.235294	exonic	CCDC102B	nonsynonymous SNV	P+K-	PK	0.02383	0.04722
18_66678326	rs3763951	T	C	0.0277778	0.166667	0	exonic	CCDC102B	synonymous SNV	P+K-	PK	0.02493	0.1987
18_70209321	rs7237888	C	A	0.75	0.769231	0.45	exonic	CBLN2	synonymous SNV	P+K-	PK	0.03475	0.05212
18_71928150	rs7238987	C	T	0.194444	0.0588235	0.25	exonic	CYB5A	synonymous SNV	P-K+	PK	0.04626	0.06405
19_756985	rs8110536	T	G	0.138889	0.277778	0.0555556	exonic	MISP	synonymous SNV	P+K-	PK	0.02383	0.0632
19_813220	rs351994	T	C	0.147059	0.09375	0.375	exonic	PLPPR3	nonsynonymous SNV	P-K+	PK	0.0164	0.04332
19_1036444	rs930231	G	A	0.25	0.388889	0.111111	exonic	CNN2	synonymous SNV	P+K-	PK	0.01295	0.09423
19_1037986	rs3848640	A	G	0.205882	0.34375	0.0833333	UTR3	CNN2	0	P+K-	PK	0.0144	0.06246
19_1038571	rs1057874	C	T	0.735294	0.846154	0.535714	UTR3	CNN2	0	P+K-	PK	0.01961	0.03333
19_1049269	rs4147914	G	A	0.111111	0.194444	0.441176	exonic	ABCA7	synonymous SNV	P-K+	PK	0.03903	0.05152
19_1085966	rs3761028	A	G	0.527778	0.638889	0.361111	exonic	ARHGAP45	synonymous SNV	P+K-	PK	0.03318	0.05851
19_1086352	rs12471	C	A	0.444444	0.611111	0.333333	UTR3	ARHGAP45	0	P+K-	PK	0.0329	0.09353
19_2410332	rs3848635	T	C	0.305556	0.111111	0.361111	exonic	TMPRSS9	synonymous SNV	P-K+	PK	0.02463	0.07949
19_2413961	rs10153475	G	C	0.25	0.111111	0.361111	exonic	TMPRSS9	synonymous SNV	P-K+	PK	0.02463	0.09423
19_2427815	rs4806847	A	G	0.25	0.111111	0.323529	UTR5	TIMM13	0	P-K+	PK	0.04203	0.08949
19_3595522	rs13306046	G	A	0.0588235	0.0277778	0.205882	UTR3	TBXA2R	0	P-K+	PK	0.02564	0.08024
19_3595794	rs4523	A	G	0.444444	0.277778	0.555556	exonic	TBXA2R	synonymous SNV	P-K+	PK	0.03066	0.08979
19_3977486	rs36527	A	G	0.833333	0.972222	0.75	exonic	EEF2	synonymous SNV	P+K-	PK	0.01359	0.1514
19_3979408	rs36526	A	G	0.833333	0.972222	0.75	exonic	EEF2	synonymous SNV	P+K-	PK	0.01359	0.1514
19_4028783	rs2289863	C	T	0.555556	0.722222	0.444444	exonic	PIAS4	synonymous SNV	P+K-	PK	0.03066	0.05771
19_4037966	rs72976977	T	C	0.222222	0.0277778	0.25	UTR3	PIAS4	0	P-K+	PK	0.01359	0.1113
19_4670402	rs28365954	G	T	0.0277778	0.0294118	0.222222	UTR5	MYDGF	0	P-K+	PK	0.02813	0.05571
19_5110794	rs2613739	A	G	0.611111	0.40625	0.785714	exonic	KDM4B	synonymous SNV	P-K+	PK	0.003988	0.0561
19_5559900	rs45575840	G	C	0.75	0.583333	0.823529	ncRNA_exonic	TINCR	0	P-K+	PK	0.03783	0.06404
19_7571030	rs3826736	T	A	0.205882	0.40625	0.0882353	exonic	TEX45	nonsynonymous SNV	P+K-	PK	0.003641	0.05139
19_7929624	rs13265	G	A	0.0277778	0.0555556	0.25	UTR3	EVI5L	0	P-K+	PK	0.0457	0.05527
19_8841558	rs28324	T	C	0.388889	0.666667	0.361111	exonic	OR2Z1	synonymous SNV	P+K-	PK	0.01776	0.09619
19_8994156	.	C	T	0	0.194444	0	exonic	MUC16	synonymous SNV	P+K-	PK	0.01133	0.1145
19_9005719	rs4804375	A	G	0.638889	0.861111	0.617647	exonic	MUC16	synonymous SNV	P+K-	PK	0.02847	0.07392
19_9006749	rs75444444	C	T	0.25	0.111111	0.333333	exonic	MUC16	nonsynonymous SNV	P-K+	PK	0.0451	0.09423
19_9063515	rs376936287	T	G	0.111111	0.0555556	0.25	exonic	MUC16	synonymous SNV	P-K+	PK	0.0457	0.1514
19_9077196	rs7254941	C	T	0.111111	0	0.176471	exonic	MUC16	nonsynonymous SNV	P-K+	PK	0.01026	0.05571
19_9085004	rs11085805	T	C	0.111111	0.25	0.0555556	exonic	MUC16	nonsynonymous SNV	P+K-	PK	0.0457	0.0847
19_10218408	rs2305790	G	A	0.138889	0.444444	0.138889	ncRNA_exonic	SNORD105	0	P+K-	PK	0.008624	0.0451
19_10225682	rs3816556	G	C	0.147059	0.472222	0.09375	UTR3	P2RY11;PPAN-P2RY11	0	P+K-	PK	0.001062	0.07718
19_10226052	rs2305795	G	A	0.694444	0.444444	0.722222	UTR3	P2RY11;PPAN-P2RY11	0	P-K+	PK	0.03066	0.07208
19_10226256	rs7710	A	G	0.527778	0.277778	0.555556	exonic	EIF3G	synonymous SNV	P-K+	PK	0.03066	0.05371
19_10415648	rs34561079	G	A	0	0.176471	0	UTR3	ZGLP1	0	P+K-	PK	0.02457	0.1139
19_11893555	rs286217	T	C	0.115385	0.235294	0.03125	UTR3	ZNF441	0	P+K-	PK	0.02753	0.03319
19_12256912	rs7258368	C	T	0.166667	0.166667	0	exonic	ZNF625	nonsynonymous SNV	P+K-	PK	0.02493	0.1065
19_12541532	rs10422063	C	A	0.764706	0.852941	0.611111	exonic	ZNF443	nonsynonymous SNV	P+K-	PK	0.03174	0.08686
19_12541547	rs10402252	T	G	0.222222	0.416667	0.0833333	exonic	ZNF443	nonsynonymous SNV	P+K-	PK	0.002157	0.055
19_12542772	rs1134389	C	T	0.194444	0.411765	0.0555556	exonic	ZNF443	nonsynonymous SNV	P+K-	PK	0.0004607	0.06405
19_12572300	rs4804194	G	A	0.777778	0.852941	0.5625	UTR3	ZNF709	0	P+K-	PK	0.01389	0.06272
19_12576049	rs7259240	G	A	0.176471	0.382353	0.117647	exonic	ZNF709	synonymous SNV	P+K-	PK	0.02335	0.08628
19_14262129	.	A	C	0.0555556	0	0.125	exonic	ADGRL1	synonymous SNV	P-K+	PK	0.04416	0.1139
19_15198631	rs8105737	A	C	0.722222	0.764706	0.472222	exonic	OR1I1	nonsynonymous SNV	P+K-	PK	0.01504	0.05026
19_15233581	rs2074265	C	A	0.472222	0.388889	0.694444	exonic	ILVBL	synonymous SNV	P-K+	PK	0.01739	0.1554
19_15350594	rs11669901	G	A	0.222222	0.305556	0.0833333	exonic	BRD4	synonymous SNV	P+K-	PK	0.03457	0.1348
19_16008388	rs3093105	A	C	0.166667	0.111111	0.323529	exonic	CYP4F2	nonsynonymous SNV	P-K+	PK	0.04203	0.07949
19_16612011	rs728117	T	C	0.138889	0.305556	0.0882353	exonic	C19orf44	synonymous SNV	P+K-	PK	0.0352	0.08949
19_16629189	rs7783	A	G	0.166667	0.361111	0.0882353	UTR3	C19orf44;CHERP	0	P+K-	PK	0.009567	0.09573
19_17170885	rs1130222	C	T	0.583333	0.527778	0.805556	exonic	HAUS8	nonsynonymous SNV	P-K+	PK	0.02344	0.05054
19_18679379	rs7648	C	G	0.361111	0.305556	0.611111	exonic	KXD1	nonsynonymous SNV	P-K+	PK	0.01739	0.05611
19_18685964	rs6554	G	T	0.361111	0.333333	0.611111	UTR3	UBA52	0	P-K+	PK	0.0329	0.05771
19_19905011	rs12975121	C	T	0.0294118	0.264706	0.0384615	UTR3	ZNF506	0	P+K-	PK	0.03293	0.05219
19_20003576	rs12460570	C	G	0.166667	0.333333	0.111111	UTR3	ZNF253	0	P+K-	PK	0.0451	0.1348
19_22272743	rs9304994	G	A	0.821429	0.71875	0.964286	UTR3	ZNF257	0	P-K+	PK	0.01438	0.0217
19_33579128	rs7259333	T	C	0.7	0.5	0.75	exonic	GPATCH1	synonymous SNV	P-K+	PK	0.04643	0.07233
19_33600764	rs2287679	T	C	0.694444	0.555556	0.805556	exonic	GPATCH1	nonsynonymous SNV	P-K+	PK	0.04198	0.1368
19_33605312	rs10421769	T	C	0.861111	0.638889	0.875	exonic	GPATCH1	nonsynonymous SNV	P-K+	PK	0.02873	0.08065
19_33608733	rs2287681	C	A	0.388889	0.1875	0.444444	exonic	GPATCH1	synonymous SNV	P-K+	PK	0.03707	0.06797
19_33635761	rs3848596	C	T	0.611111	0.583333	0.888889	exonic	WDR88	synonymous SNV	P-K+	PK	0.006554	0.07907
19_34304903	rs14810	C	G	0.722222	0.472222	0.75	UTR3	KCTD15	0	P-K+	PK	0.02873	0.08497
19_35719020	rs541169	C	T	0.472222	0.638889	0.333333	exonic	FAM187B	stopgain	P+K-	PK	0.01776	0.05611
19_35770292	rs1051995	C	T	0.25	0.305556	0.0625	UTR3	USF2	0	P+K-	PK	0.01371	0.04626
19_36048741	rs2230181	G	T	0.392857	0.25	0.638889	exonic	ATP4A	synonymous SNV	P-K+	PK	0.001649	0.0455
19_37002529	rs11670917	G	T	0.40625	0.5	0.0833333	UTR3	ZNF260	0	P+K-	PK	0.001765	0.02509
19_37825633	rs10404602	A	T	0.388889	0.5	0.222222	UTR5	HKR1	0	P+K-	PK	0.02631	0.08497
19_38188652	rs2287229	G	A	0.583333	0.441176	0.705882	UTR3	ZNF607	0	P-K+	PK	0.04896	0.05611
19_38377773	rs34785154	G	A	0.388889	0.472222	0.222222	exonic	WDR87	nonsynonymous SNV	P+K-	PK	0.04661	0.08497
19_39760435	rs59746524	T	C	0.361111	0.472222	0.222222	exonic	IFNL2	nonsynonymous SNV	P+K-	PK	0.04661	0.05054
19_40030704	rs7252027	C	T	0.222222	0.472222	0.222222	exonic	EID2	nonsynonymous SNV	P+K-	PK	0.04661	0.06404
19_41828760	rs3810173	C	G	0.166667	0.0277778	0.205882	UTR3	CCDC97	0	P-K+	PK	0.02564	0.0847
19_43372037	rs3199707	G	C	0.0833333	0.0625	0.454545	UTR3	PSG1	0	P-K+	PK	0.01153	0.01442
19_44095077	rs8113762	A	G	0.25	0.388889	0.117647	UTR3	IRGQ	0	P+K-	PK	0.01339	0.055
19_45021210	rs10414398	G	A	0.0833333	0.416667	0.111111	exonic	CEACAM20	nonsynonymous SNV	P+K-	PK	0.006554	0.0451
19_45029208	rs10408247	G	A	0.0833333	0.416667	0.111111	exonic	CEACAM20	nonsynonymous SNV	P+K-	PK	0.006554	0.0451
19_45041627	rs7257697	G	A	0.611111	0.05	0.590909	ncRNA_exonic	CEACAM22P	0	P-K+	PK	0.0002272	0.01797
19_45382034	rs6859	A	G	0.75	0.583333	0.861111	UTR3	NECTIN2	0	P-K+	PK	0.01664	0.09423
19_46029981	rs10156	T	C	0.9375	0.588235	0.84375	UTR3	VASP	0	P-K+	PK	0.03009	0.06151
19_46664400	rs10408162	A	G	0.444444	0.583333	0.294118	UTR3	IGFL2	0	P+K-	PK	0.01787	0.05487
19_46714904	rs62111781	G	A	0.25	0.5	0.194444	ncRNA_exonic	LOC93429	0	P+K-	PK	0.01253	0.1285
[truncated: 4,977 more rows]

## Sheet: Vadu_Mastersheet
Chr_pos (GrCh37)	SNP	Ref_allele	Alt_allele	V_Alt_Allele_frq	P_Alt_Allele_frq	K_Alt_Allele_frq	Genic_Region	Gene	Gene_Impact	Profile	Class	Fisher's original Pvalue	Permuted_Pvalue
21_45180064	rs1893206	T	C	0.24	0.5	0.03	UTR3	PDXK	.	P+K-	PK	1.28e-05	0.02145
5_132198199	rs254286	G	A	0.63	1	0.41	exonic	GDF9	synonymous SNV	P+K-	PK	2.25e-05	0.01208
2_15731998	rs10221770	A	G	0.81	1	0.64	UTR5	DDX1	.	P+K-	PK	6.82e-05	0.01736
11_123777497	rs10750250	G	A	0.56	0.89	0.44	exonic	OR8D4	nonsynonymous SNV	P+K-	PK	0.0001189	0.04661
3_195497143	rs2293232	C	T	0.42	0.56	0.11	exonic	MUC4	nonsynonymous SNV	P+K-	PK	0.0001189	0.08497
11_50257407	rs2026797	G	A	0.21	0.56	0.09	ncRNA_exonic	LOC441601	.	P+K-	PK	0.0001225	0.02055
11_204968	rs12785943	G	A	0.21	0.38	0	UTR3	BET1L	.	P+K-	PK	0.0001375	0.02347
1_225534348	rs7535953	G	A	0.47	0.74	0.25	exonic	DNAH14	nonsynonymous SNV	P+K-	PK	0.0001712	0.0516
3_40468896	rs1047855	C	T	0.44	0.5	0.08	exonic	ENTPD3	nonsynonymous SNV	P+K-	PK	0.0001824	0.08497
19_21688495	rs73017722	C	T	0.45	0.73	0.19	UTR5	ZNF429	.	P+K-	PK	0.0002199	0.01384
19_21565393	rs7257580	G	A	0.63	0.78	0.32	intronic	ZNF738	.	P+K-	PK	0.0002282	0.01983
6_29431698	rs3128854	A	G	0.58	0.88	0.44	UTR3	OR2H1	.	P+K-	PK	0.0002368	0.03682
1_248085011	rs4595394	C	G	0.55	0.92	0.41	exonic	OR2T8	nonsynonymous SNV	P+K-	PK	0.0003705	0.02248
11_120827609	rs644057	A	G	0.85	0.92	0.41	exonic	GRIK4	synonymous SNV	P+K-	PK	0.0003705	0.0187
19_21567965	rs11673304	A	G	0	0.44	0	UTR3	ZNF738	.	P+K-	PK	0.0003707	0.01976
13_100548455	rs6491536	C	A	0.74	0.74	0.31	ncRNA_intronic	LOC101927437	.	P+K-	PK	0.000387	0.04643
19_21563398	rs7248601	A	G	0.4	0.63	0.13	intronic	ZNF738	.	P+K-	PK	0.0004038	0.0227
11_94865068	rs533669	G	T	0.19	0.44	0.06	UTR3	ENDOD1	.	P+K-	PK	0.0004044	0.02347
11_123777986	rs7942047	T	C	0.56	0.86	0.44	exonic	OR8D4	nonsynonymous SNV	P+K-	PK	0.0004077	0.04661
16_81161578	rs7206183	G	A	0.42	0.56	0.14	exonic	PKD1L2	unknown	P+K-	PK	0.0004077	0.05054
5_149935171	rs13181064	T	C	0.81	0.86	0.44	UTR3	NDST1	.	P+K-	PK	0.0004077	0.04198
1_111957688	rs3767607	T	C	0.09	0.38	0.03	exonic	OVGP1	nonsynonymous SNV	P+K-	PK	0.0004378	0.02347
11_123777536	rs7926767	G	A	0.41	0.82	0.42	exonic	OR8D4	nonsynonymous SNV	P+K-	PK	0.0005872	0.05107
11_233212	rs11555236	C	A	0.17	0.42	0	exonic	SIRT3	synonymous SNV	P+K-	PK	0.0005997	0.0147
1_248041182	rs10888263	T	G	0.61	0.81	0.39	UTR3	TRIM58	.	P+K-	PK	0.0006403	0.05371
15_74888196	rs74781061	A	G	0.36	0.68	0.25	UTR3	ARID3B	.	P+K-	PK	0.000663	0.02958
11_123777736	rs10790610	T	C	0.25	0.5	0.11	exonic	OR8D4	nonsynonymous SNV	P+K-	PK	0.0006708	0.055
11_123813940	rs7130003	G	C	0.25	0.5	0.11	exonic	OR6T1	synonymous SNV	P+K-	PK	0.0006708	0.055
13_52024936	rs2277445	T	A	0.75	0.89	0.5	UTR3	INTS6	.	P+K-	PK	0.0006708	0.055
12_104170124	rs11111762	G	A	0.38	0.53	0.11	UTR3	NT5DC3	.	P+K-	PK	0.000694	0.02008
1_248039713	rs3811445	A	G	0.58	0.79	0.39	exonic	TRIM58	synonymous SNV	P+K-	PK	0.0007184	0.05258
19_4333711	rs7247504	C	T	0.75	0.79	0.39	exonic	STAP2	nonsynonymous SNV	P+K-	PK	0.0007184	0.02644
13_100546450	rs7333559	G	A	0.67	0.79	0.34	ncRNA_intronic	LOC101927437	.	P+K-	PK	0.0007633	0.05634
19_30315112	rs1406	C	A	0.53	0.69	0.28	UTR3	CCNE1	.	P+K-	PK	0.000835	0.05771
7_77647322	rs4473963	T	C	0.47	0.72	0.31	UTR3	MAGI2	.	P+K-	PK	0.000835	0.03318
11_204147	rs2280545	G	A	0.17	0.34	0.03	UTR3	BET1L	.	P+K-	PK	0.0008407	0.05388
3_21447407	rs35986875	C	T	0	0.31	0	ncRNA_exonic	VENTXP7	.	P+K-	PK	0.0008518	0.02586
4_56236579	rs13149568	C	T	0.63	0.86	0.38	ncRNA_UTR3	SRD5A3	.	P+K-	PK	0.0009073	0.02021
3_46306700	rs4987053	T	C	0.14	0.38	0	exonic	CCR3	synonymous SNV	P+K-	PK	0.000911	0.01215
2_216807726	rs8911	A	G	0.17	0.28	0	UTR3	MREG	.	P+K-	PK	0.0009481	0.1113
2_216808152	rs6435927	C	A	0.17	0.28	0	UTR3	MREG	.	P+K-	PK	0.0009481	0.1113
1_248040018	rs4925574	A	G	0.25	0.44	0.08	UTR3	TRIM58	.	P+K-	PK	0.0009839	0.06404
1_248041599	rs11204535	A	G	0.25	0.44	0.08	UTR3	TRIM58	.	P+K-	PK	0.0009839	0.06404
11_111223405	rs11213847	G	A	0.24	0.44	0.08	UTR3	POU2AF1	.	P+K-	PK	0.0009839	0.04203
19_21591035	rs12983787	C	T	0.66	0.68	0.21	UTR3	ZNF493	.	P+K-	PK	0.001052	0.0337
11_233067	rs11246020	C	T	0.17	0.32	0.03	exonic	SIRT3	nonsynonymous SNV	P+K-	PK	0.001137	0.05184
19_17397700	rs10401700	A	C	0.45	0.81	0.27	UTR3	ANKLE1	.	P+K-	PK	0.001159	0.01439
16_31470540	rs3813002	T	C	0.47	0.81	0.37	UTR5	ARMC5	.	P+K-	PK	0.001173	0.02907
8_56363503	rs2975987	G	A	0.09	0.38	0.03	ncRNA_exonic	SBF1P1	.	P+K-	PK	0.001205	0.02411
19_21570206	rs8106936	G	C	0.54	0.58	0.14	UTR3	ZNF738	.	P+K-	PK	0.001257	0.01827
19_21591010	rs4341872	T	C	0.81	0.87	0.47	UTR3	ZNF493	.	P+K-	PK	0.001322	0.03009
8_57353530	rs16920581	T	C	0.18	0.33	0.03	UTR3	PENK	.	P+K-	PK	0.001336	0.04203
3_121347101	rs4676685	G	A	0.5	0.33	0	UTR3	FBXO40	.	P+K-	PK	0.00137	0.01945
12_5021348	rs2227910	G	C	0.62	0.69	0.28	exonic	KCNA1	synonymous SNV	P+K-	PK	0.001374	0.03038
1_12082334	rs11553925	A	T	0.12	0.33	0.03	exonic	MIIP	nonsynonymous SNV	P+K-	PK	0.001381	0.02638
11_126163691	rs611953	A	G	0.83	0.97	0.67	UTR3	TIRAP	.	P+K-	PK	0.001381	0.032
12_118509191	rs7307331	G	A	0.17	0.41	0	exonic	VSIG10	nonsynonymous SNV	P+K-	PK	0.001403	0.03757
9_45728002	.	C	T	0.8	0.96	0.55	intergenic	LOC107984035(dist=162878),FAM27E2(dist=388941)	.	P+K-	PK	0.001403	0.04712
2_162280748	rs890076	G	A	0.63	0.94	0.45	UTR3	TBR1	.	P+K-	PK	0.001405	0.01224
19_17393015	rs1864116	C	T	0.68	0.78	0.38	exonic	ANKLE1	nonsynonymous SNV	P+K-	PK	0.001412	0.02644
11_123777498	rs10893102	C	T	0.25	0.47	0.11	exonic	OR8D4	synonymous SNV	P+K-	PK	0.001493	0.06404
5_32400266	rs1051489	A	G	0.39	0.47	0.11	exonic	ZFR	nonsynonymous SNV	P+K-	PK	0.001493	0.04661
9_139924637	rs13301354	T	C	0.73	0.82	0.38	UTR3	FUT7	.	P+K-	PK	0.001524	0.0231
1_22443887	rs1046310	G	T	0.56	0.61	0.22	UTR3	WNT4	.	P+K-	PK	0.001666	0.05611
10_5681830	rs41290333	A	C	0.28	0.27	0	UTR3	ASB13	.	P+K-	PK	0.001731	0.04014
3_40518821	rs9882171	G	A	0.41	0.5	0.14	UTR5	ZNF619	.	P+K-	PK	0.001748	0.04073
6_32489853	rs78961241	A	C	0.62	0.87	0.46	exonic	HLA-DRB5	nonsynonymous SNV	P+K-	PK	0.001777	0.01316
16_75269534	rs3743613	C	T	0.64	0.64	0.25	exonic	BCAR1	synonymous SNV	P+K-	PK	0.00183	0.05611
19_53741188	rs12984473	C	T	0.41	0.75	0.36	exonic	ZNF677	synonymous SNV	P+K-	PK	0.00183	0.03065
10_81445802	rs2983793	A	G	0.38	0.71	0.14	ncRNA_exonic	BEND3P3	.	P+K-	PK	0.001891	0.011
1_235712268	rs10802804	G	A	0.29	0.45	0	UTR3	GNG4	.	P+K-	PK	0.001906	0.01208
11_86657520	rs713065	A	G	0.5	0.67	0.28	UTR3	FZD4	.	P+K-	PK	0.001933	0.05851
2_113309473	rs1545133	C	T	0.47	0.69	0.31	exonic	POLR1B	nonsynonymous SNV	P+K-	PK	0.001968	0.05851
2_10059770	rs1820965	G	T	0.63	0.79	0.38	exonic	TAF1B	nonsynonymous SNV	P+K-	PK	0.001979	0.03756
4_151177428	rs13101461	C	G	0.25	0.68	0.23	UTR3	DCLK2	.	P+K-	PK	0.00198	0.01191
17_44625928	rs151267673	C	A	0.79	0.92	0.54	exonic	LRRC37A2	nonsynonymous SNV	P+K-	PK	0.002017	0.03585
11_123814489	rs4936859	A	G	0.25	0.5	0.14	exonic	OR6T1	synonymous SNV	P+K-	PK	0.002046	0.055
18_48256888	rs3288	T	C	0.33	0.5	0.14	UTR3	MAPK4	.	P+K-	PK	0.002046	0.07208
18_48257413	rs71357248	C	T	0.31	0.5	0.14	UTR3	MAPK4	.	P+K-	PK	0.002046	0.06404
7_5272927	rs6949942	C	T	0.15	0.26	0	UTR3	WIPI2	.	P+K-	PK	0.002129	0.02718
11_124294703	rs10750270	T	C	0.19	0.42	0.08	exonic	OR8B4	nonsynonymous SNV	P+K-	PK	0.002157	0.06404
12_49937813	rs1150057	A	G	0.06	0.25	0	exonic	KCNH3	synonymous SNV	P+K-	PK	0.002212	0.05527
2_233346498	rs142492002	C	T	0.08	0.25	0	exonic	ECEL1	nonsynonymous SNV	P+K-	PK	0.002212	0.1065
6_168462626	rs12197610	G	A	0.14	0.25	0	exonic	FRMD1	synonymous SNV	P+K-	PK	0.002212	0.0847
16_68260827	rs28361357	G	A	0.46	0.32	0	UTR3	NFATC3	.	P+K-	PK	0.002233	0.03633
19_16831060	rs12983375	C	T	0.28	0.31	0.03	UTR5	NWD1	.	P+K-	PK	0.002429	0.02587
15_100330535	rs79797081	G	T	0.15	0.3	0	ncRNA_exonic	DNM1P46	.	P+K-	PK	0.002439	0.015
13_47327160	rs912124	T	C	0.76	0.93	0.59	UTR3	LRCH1	.	P+K-	PK	0.002472	0.0169
17_2940671	rs11552060	C	G	0.29	0.5	0.05	UTR3	RAP1GAP2	.	P+K-	PK	0.002594	0.02561
17_8048283	rs2735611	G	A	0.72	1	0.55	exonic	PER1	synonymous SNV	P+K-	PK	0.002721	0.01622
1_201455815	rs3767542	A	G	0.44	0.36	0.06	intronic	CSRP1	.	P+K-	PK	0.002766	0.07208
11_214421	rs3216	G	C	0.17	0.36	0.06	UTR3	RIC8A	.	P+K-	PK	0.002766	0.07949
12_58345606	rs17120203	T	C	0.17	0.36	0.06	exonic	ATP23	synonymous SNV	P+K-	PK	0.002766	0.1348
21_43131861	rs9982491	A	G	0.19	0.36	0.06	ncRNA_exonic	LINC00479	.	P+K-	PK	0.002766	0.0451
3_9918861	rs456168	C	A	0.22	0.36	0.06	exonic	CIDEC	synonymous SNV	P+K-	PK	0.002766	0.07949
16_71682796	rs61733125	T	C	0.5	0.73	0.3	exonic	PHLPP2	synonymous SNV	P+K-	PK	0.002851	0.01983
10_5681032	rs76511142	G	A	0.28	0.31	0.03	UTR3	ASB13	.	P+K-	PK	0.002979	0.07949
11_126139100	rs1786702	T	C	0.86	0.97	0.69	UTR5	FOXRED1	.	P+K-	PK	0.002979	0.03457
3_44483010	rs78786581	C	T	0.25	0.31	0.03	UTR3	ZNF445	.	P+K-	PK	0.002979	0.0632
4_185701549	rs1803898	G	T	0.11	0.31	0.03	exonic	ACSL1	synonymous SNV	P+K-	PK	0.002979	0.0847
1_248085124	rs4590708	G	A	0.59	0.59	0.22	exonic	OR2T8	nonsynonymous SNV	P+K-	PK	0.003105	0.03318
19_17396549	rs751599	T	C	0.69	0.81	0.44	exonic	ANKLE1	synonymous SNV	P+K-	PK	0.003124	0.04661
9_77376647	rs2274924	T	C	0.22	0.56	0.19	exonic	TRPM6	nonsynonymous SNV	P+K-	PK	0.003124	0.07208
3_49460350	rs1464569	A	G	0.88	0.96	0.63	UTR3	NICN1	.	P+K-	PK	0.003131	0.0235
6_52529904	rs2670125	T	C	0.56	0.66	0.28	ncRNA_exonic	LOC730101	.	P+K-	PK	0.003146	0.02803
11_123813823	rs7129884	G	A	0.25	0.44	0.11	exonic	OR6T1	synonymous SNV	P+K-	PK	0.003191	0.0451
17_3469766	rs4790521	T	C	0.44	0.44	0.11	UTR3	TRPV1	.	P+K-	PK	0.003191	0.04198
19_57176304	rs12460400	T	G	0.14	0.5	0.08	exonic	ZNF835	nonsynonymous SNV	P+K-	PK	0.00322	0.02061
10_75561916	rs4691	T	C	0.33	0.5	0.12	UTR3	NDST2	.	P+K-	PK	0.003223	0.01468
20_62197370	rs34830600	G	A	0.04	0.23	0	exonic	HELZ2	synonymous SNV	P+K-	PK	0.003277	0.04727
22_22977554	rs201670132	G	C	0.22	0.23	0	ncRNA_exonic	POM121L1P	.	P+K-	PK	0.003277	0.03996
10_124516261	rs57680701	G	T	0.13	0.5	0.1	ncRNA_exonic	DMBT1P1	.	P+K-	PK	0.003358	0.02378
3_39185077	rs1274957	G	A	0.39	0.81	0.43	exonic	CSRNP1	synonymous SNV	P+K-	PK	0.003447	0.01339
11_20404613	rs3824886	T	G	0.86	1	0.78	exonic	HTATIP2	nonsynonymous SNV	P+K-	PK	0.003472	0.02457
11_123778031	rs7927385	G	A	0.47	0.78	0.42	exonic	OR8D4	nonsynonymous SNV	P+K-	PK	0.00358	0.05611
11_2891965	rs2239897	A	G	0.25	0.58	0.22	ncRNA_exonic	KCNQ1DN	.	P+K-	PK	0.00358	0.03066
15_74889163	rs11072494	C	T	0.33	0.58	0.22	UTR3	ARID3B	.	P+K-	PK	0.00358	0.04661
16_71773190	rs904763	G	T	0.58	0.78	0.42	exonic	AP1G1	nonsynonymous SNV	P+K-	PK	0.00358	0.05611
19_17395055	rs11882562	C	G	0.72	0.78	0.42	exonic	ANKLE1	synonymous SNV	P+K-	PK	0.00358	0.0367
21_15646405	rs2236001	C	A	0.13	0.36	0	ncRNA_exonic	ABCC13	.	P+K-	PK	0.003608	0.01195
22_30638226	rs929271	T	G	0.09	0.36	0	UTR3	LIF	.	P+K-	PK	0.003608	0.007966
17_45901123	rs3209	T	C	0.14	0.27	0	UTR3	MRPL10	.	P+K-	PK	0.003665	0.01649
5_150226722	rs10059011	A	C	0.35	0.7	0.27	UTR5	IRGM	.	P+K-	PK	0.003715	0.01835
10_134902398	rs10776693	C	T	0.59	0.82	0.47	UTR5	ADGRA1	.	P+K-	PK	0.003757	0.03605
13_44596756	rs3751440	G	A	0.64	0.64	0.25	ncRNA_exonic	NRAD1	.	P+K-	PK	0.003771	0.02341
6_149795545	rs73779377	G	A	0.07	0.36	0	exonic	ZC3H12D	synonymous SNV	P+K-	PK	0.003776	0.01626
2_227872995	rs2228555	T	C	0.71	0.76	0.42	exonic	COL4A4	synonymous SNV	P+K-	PK	0.003908	0.04833
19_53739958	rs17272966	C	T	0.5	0.75	0.39	UTR3	ZNF677	.	P+K-	PK	0.003944	0.05611
19_53740822	rs8113436	T	C	0.47	0.75	0.39	exonic	ZNF677	synonymous SNV	P+K-	PK	0.003944	0.05611
19_53741068	rs12984188	C	T	0.47	0.75	0.39	exonic	ZNF677	synonymous SNV	P+K-	PK	0.003944	0.05611
17_72766993	rs12797	G	A	0.47	0.56	0.19	UTR3	NAT9	.	P+K-	PK	0.004037	0.03789
10_81682645	rs1054053	A	G	0.67	0.84	0.5	ncRNA_exonic	MBL1P	.	P+K-	PK	0.004065	0.05396
3_130104206	rs10212372	A	G	0.21	0.5	0.16	exonic	COL6A5	synonymous SNV	P+K-	PK	0.004065	0.06054
7_36764123	rs3807605	T	C	0.19	0.25	0	UTR5	AOAH	.	P+K-	PK	0.004145	0.0104
17_4856376	rs238238	A	G	0.39	0.72	0.36	exonic	ENO3	nonsynonymous SNV	P+K-	PK	0.004198	0.09779
5_96364454	rs39602	C	G	0.5	0.64	0.28	UTR3	LNPEP	.	P+K-	PK	0.004198	0.05771
6_39870013	rs3004071	T	C	0.73	0.76	0.39	UTR3	DAAM2	.	P+K-	PK	0.004263	0.01686
19_55993790	rs7254184	A	G	0.56	0.97	0.7	exonic	ZNF628	synonymous SNV	P+K-	PK	0.004275	0.02126
14_62585489	rs2275872	A	G	0.56	0.86	0.53	ncRNA_exonic	LINC00643	.	P+K-	PK	0.00429	0.07907
2_234927688	rs2052029	C	G	0.72	0.86	0.53	UTR3	TRPM8	.	P+K-	PK	0.00429	0.1073
17_56620501	rs17222523	A	G	0.09	0.22	0	exonic	SEPTIN4	synonymous SNV	P+K-	PK	0.004322	0.05079
12_104170148	rs11111763	A	C	0.15	0.5	0.06	UTR3	NT5DC3	.	P+K-	PK	0.004326	0.01257
19_21544571	rs1142653	G	A	0.61	0.69	0.33	exonic	ZNF738	nonsynonymous SNV	P+K-	PK	0.004328	0.09353
11_69924476	rs11233122	T	G	0.35	0.43	0.07	upstream	ANO1	.	P+K-	PK	0.004337	0.02348
4_4249483	rs2916466	C	T	0.8	0.96	0.65	UTR5	TMEM128	.	P+K-	PK	0.004426	0.01973
11_126164349	rs625413	T	C	0.85	1	0.79	UTR3	TIRAP	.	P+K-	PK	0.004488	0.02981
17_36830727	rs76756126	G	A	0.09	0.21	0	exonic	EPOP	nonsynonymous SNV	P+K-	PK	0.004488	0.02607
2_114357289	rs11490000	G	A	0.14	0.21	0	ncRNA_exonic	DDX11L2	.	P+K-	PK	0.004488	0.1065
11_33891357	rs11032432	G	C	0.22	0.47	0.15	UTR5	LMO2	.	P+K-	PK	0.004534	0.05161
9_34371788	rs7852399	A	T	0.22	0.39	0.08	exonic	MYORG	unknown	P+K-	PK	0.004555	0.09423
2_232388035	rs11673905	T	C	0.22	0.4	0	UTR3	NMUR1	.	P+K-	PK	0.004588	0.01492
1_77748786	rs2689680	A	G	0.72	0.71	0.36	UTR5	AK5	.	P+K-	PK	0.004668	0.03066
16_2551015	rs76267944	C	T	0.22	0.4	0.07	UTR3	TBC1D24	.	P+K-	PK	0.004769	0.02686
6_42689755	rs7764439	A	G	0.25	0.33	0	exonic	PRPH2	synonymous SNV	P+K-	PK	0.004836	0.01383
5_74326530	rs76385772	T	C	0.09	0.24	0	intronic	GCNT4	.	P+K-	PK	0.004912	0.02718
12_48527186	rs1049392	C	T	0.14	0.22	0	exonic	PFKM	synonymous SNV	P+K-	PK	0.005056	0.1065
17_16852206	rs35062843	A	C	0.17	0.22	0	exonic	TNFRSF13B	synonymous SNV	P+K-	PK	0.005056	0.1065
19_22849013	rs7248841	G	T	0	0.22	0	UTR3	ZNF492	.	P+K-	PK	0.005056	0.1145
2_176994739	rs847162	G	A	0.17	0.22	0	UTR5	HOXD8	.	P+K-	PK	0.005056	0.1065
2_227867439	rs1054415	G	C	0.19	0.22	0	UTR3	COL4A4	.	P+K-	PK	0.005056	0.1065
2_33951749	rs2290102	A	G	0.14	0.22	0	ncRNA_exonic	MYADML	.	P+K-	PK	0.005056	0.1065
22_46454208	rs3744749	G	A	0.14	0.22	0	ncRNA_exonic	PRR34-AS1	.	P+K-	PK	0.005056	0.0632
4_154197234	rs2289409	T	G	0.17	0.22	0	exonic	TRIM2	synonymous SNV	P+K-	PK	0.005056	0.0847
5_74323484	rs79804347	T	G	0.11	0.22	0	UTR3	GCNT4	.	P+K-	PK	0.005056	0.05527
6_25726621	rs9467583	C	T	0.19	0.22	0	exonic	HIST1H2AA	synonymous SNV	P+K-	PK	0.005056	0.0847
6_32551928	rs29029549	G	A	0.08	0.22	0	exonic	HLA-DRB1	nonsynonymous SNV	P+K-	PK	0.005056	0.05389
11_1011490	rs7950955	G	A	0.38	0.59	0.23	UTR3	AP2A2	.	P+K-	PK	0.005128	0.03271
7_154685805	rs1047064	C	T	0.28	0.32	0.06	UTR3	DPP6	.	P+K-	PK	0.005178	0.05152
11_74042787	rs3168173	A	G	0.71	0.94	0.5	UTR3	PGM2L1	.	P+K-	PK	0.005254	0.01622
17_45885687	rs9907142	A	G	0.5	0.83	0.41	exonic	OSBPL7	synonymous SNV	P+K-	PK	0.005327	0.01054
8_29208142	rs3757999	A	G	0.23	0.43	0.12	UTR5	DUSP4	.	P+K-	PK	0.005359	0.02705
1_225533931	rs17522489	A	G	0.17	0.5	0.17	exonic	DNAH14	nonsynonymous SNV	P+K-	PK	0.005381	0.06404
1_226923264	rs708775	G	A	0.35	0.5	0.17	exonic	ITPKB	synonymous SNV	P+K-	PK	0.005381	0.08128
11_18956194	rs2014931	T	C	0.39	0.5	0.17	exonic	MRGPRX1	synonymous SNV	P+K-	PK	0.005381	0.1285
2_234927610	rs2052030	C	G	0.69	0.83	0.5	UTR3	TRPM8	.	P+K-	PK	0.005381	0.07208
5_180235737	rs11544558	C	A	0.5	0.5	0.17	UTR5	MGAT1	.	P+K-	PK	0.005381	0.07907
11_72946140	rs3741156	G	C	0.11	0.36	0.04	exonic	P2RY2	nonsynonymous SNV	P+K-	PK	0.005423	0.0268
6_32489732	rs1064677	T	A	0.15	0.28	0.03	exonic	HLA-DRB5	nonsynonymous SNV	P+K-	PK	0.005447	0.01371
6_32489733	rs1064595	A	C	0.15	0.28	0.03	exonic	HLA-DRB5	nonsynonymous SNV	P+K-	PK	0.005447	0.01371
8_144992361	rs7822511	T	C	0.05	0.46	0.06	exonic	PLEC	synonymous SNV	P+K-	PK	0.005471	0.02657
10_118890573	rs7086344	T	C	0.69	0.82	0.5	UTR3	VAX1	.	P+K-	PK	0.005716	0.03241
1_86118587	rs10791	A	T	0.08	0.26	0.03	UTR3	ZNHIT6	.	P+K-	PK	0.005731	0.05414
13_80911525	rs504122	G	A	0.28	0.41	0.11	exonic	SPRY2	nonsynonymous SNV	P+K-	PK	0.005796	0.06554
1_167759419	rs11807657	C	G	0.25	0.33	0.06	UTR3	MPZL1	.	P+K-	PK	0.00586	0.0632
15_60715643	rs3068	C	T	0.81	0.94	0.67	UTR3	ICE2	.	P+K-	PK	0.00586	0.1348
15_60715800	rs1046657	T	G	0.81	0.94	0.67	UTR3	ICE2	.	P+K-	PK	0.00586	0.1348
21_38120549	rs9983571	C	G	0.31	0.33	0.06	UTR3	SIM2	.	P+K-	PK	0.00586	0.0284
3_196312951	rs1872353	T	C	0.28	0.33	0.06	UTR3	FBXO45	.	P+K-	PK	0.00586	0.0451
5_132028858	rs4705962	T	C	0.69	0.94	0.67	UTR3	KIF3A	.	P+K-	PK	0.00586	0.06404
18_2803926	rs7238459	A	C	0.57	0.67	0.17	UTR3	SMCHD1	.	P+K-	PK	0.005932	0.01163
3_9541761	rs2625891	G	C	0.11	0.38	0	UTR3	LHFPL4	.	P+K-	PK	0.005953	0.01222
19_52393984	rs1433083	C	T	0.11	0.39	0.09	exonic	ZNF649	nonsynonymous SNV	P+K-	PK	0.005993	0.04014
19_2714771	rs2014626	T	C	0.65	0.78	0.44	UTR3	DIRAS1	.	P+K-	PK	0.006001	0.03617
17_4848450	rs6559	A	G	0.42	0.7	0.33	UTR3	RNF167	.	P+K-	PK	0.006095	0.05146
1_1916890	rs3795280	C	T	0.42	0.53	0.19	exonic	CFAP74	synonymous SNV	P+K-	PK	0.006403	0.08979
11_123894402	rs12221656	A	G	0.22	0.53	0.19	exonic	OR10G9	nonsynonymous SNV	P+K-	PK	0.006403	0.06404
14_33292743	rs2239647	A	C	0.67	0.81	0.47	exonic	AKAP6	synonymous SNV	P+K-	PK	0.006403	0.07907
14_33293122	rs1051695	A	G	0.67	0.81	0.47	exonic	AKAP6	nonsynonymous SNV	P+K-	PK	0.006403	0.07907
19_17392483	rs7246262	C	G	0.72	0.81	0.47	upstream	ANKLE1	.	P+K-	PK	0.006403	0.04661
19_17393504	rs1864113	G	C	0.75	0.81	0.47	exonic	ANKLE1	synonymous SNV	P+K-	PK	0.006403	0.05371
19_17395003	rs11086065	A	G	0.72	0.81	0.47	exonic	ANKLE1	nonsynonymous SNV	P+K-	PK	0.006403	0.06404
4_151829824	rs1201208	T	C	0.39	0.53	0.19	exonic	LRBA	synonymous SNV	P+K-	PK	0.006403	0.08979
6_41029342	rs2076472	T	C	0.22	0.5	0.17	exonic	APOBEC2	nonsynonymous SNV	P+K-	PK	0.006425	0.04627
12_32134638	rs2166807	T	C	0.75	0.97	0.72	exonic	RESF1	nonsynonymous SNV	P+K-	PK	0.006453	0.0847
13_48987032	rs2227311	A	G	0.06	0.28	0.03	UTR5	LPAR6	.	P+K-	PK	0.006453	0.05389
16_22448906	rs367837157	A	G	0.17	0.28	0.03	ncRNA_exonic	RRN3P3	.	P+K-	PK	0.006453	0.1113
2_37028486	rs2072527	T	C	0.25	0.28	0.03	exonic	VIT	synonymous SNV	P+K-	PK	0.006453	0.0847
19_54725798	rs75069054	G	T	0.28	0.31	0	intronic	LILRB3	.	P+K-	PK	0.00647	0.0157
10_71873581	rs7908957	G	A	0.1	0.45	0.08	UTR3	AIFM2	.	P+K-	PK	0.006519	0.007393
13_19687833	rs12875977	C	T	0.28	0.42	0.11	ncRNA_exonic	LOC107984132	.	P+K-	PK	0.006554	0.1073
13_19687835	rs12857573	G	A	0.28	0.42	0.11	ncRNA_exonic	LOC107984132	.	P+K-	PK	0.006554	0.1073
13_21722643	rs1046537	C	T	0.64	0.89	0.58	UTR3	SAP18	.	P+K-	PK	0.006554	0.1285
13_80910851	rs11911	A	C	0.28	0.42	0.11	UTR3	SPRY2	.	P+K-	PK	0.006554	0.06404
2_36704144	rs848547	C	T	0.61	0.89	0.58	exonic	CRIM1	synonymous SNV	P+K-	PK	0.006554	0.06404
21_43131734	rs2838094	T	A	0.28	0.42	0.11	ncRNA_exonic	LINC00479	.	P+K-	PK	0.006554	0.0451
5_132214931	rs803220	G	A	0.56	0.89	0.58	UTR3	AFF4	.	P+K-	PK	0.006554	0.04661
5_132215807	rs803219	C	T	0.56	0.89	0.58	UTR3	AFF4	.	P+K-	PK	0.006554	0.04661
9_72741298	rs2296773	G	A	0.08	0.42	0.07	exonic	MAMDC2	synonymous SNV	P+K-	PK	0.006589	0.01888
14_24909731	rs2273628	C	T	0.88	1	0.75	UTR3	KHNYN	.	P+K-	PK	0.006611	0.04614
6_46128967	rs6941587	A	G	0.17	0.47	0.15	UTR3	ENPP5	.	P+K-	PK	0.006724	0.03617
5_132214330	rs42395	T	C	0.56	0.88	0.58	UTR3	AFF4	.	P+K-	PK	0.006832	0.034
17_75372339	rs312826	C	T	0.53	0.79	0.47	UTR5	SEPTIN9	.	P+K-	PK	0.006838	0.05256
19_17394504	rs891017	A	C	0.76	0.79	0.47	exonic	ANKLE1	nonsynonymous SNV	P+K-	PK	0.006838	0.02445
6_27425185	rs1883216	C	A	0.81	0.79	0.47	exonic	ZNF184	nonsynonymous SNV	P+K-	PK	0.006838	0.07907
3_56716922	rs958755	T	G	0.81	0.94	0.67	exonic	TASOR	nonsynonymous SNV	P+K-	PK	0.006928	0.06151
9_15460445	rs1983207	G	A	0.75	0.94	0.67	UTR3	SNAPC3	.	P+K-	PK	0.006928	0.05152
12_4466403	rs11063101	A	T	0.44	0.68	0.29	UTR3	TIGAR	.	P+K-	PK	0.006942	0.04027
16_88781125	rs8043637	T	C	0.88	0.92	0.63	exonic	CTU2	synonymous SNV	P+K-	PK	0.007037	0.04137
19_53343534	rs9749288	G	A	0.33	0.59	0.25	UTR3	ZNF468	.	P+K-	PK	0.007144	0.05054
19_53343535	rs9749334	T	C	0.33	0.59	0.25	UTR3	ZNF468	.	P+K-	PK	0.007144	0.05054
21_34668976	rs8178562	G	A	0.28	0.59	0.25	UTR3	IL10RB	.	P+K-	PK	0.007144	0.05026
21_45176304	rs2070535	T	C	0.25	0.5	0.17	UTR3	PDXK	.	P+K-	PK	0.007198	0.04073
8_98788033	rs2449509	G	C	0.64	0.75	0.42	UTR5	LAPTM4B	.	P+K-	PK	0.007234	0.04726
11_74203308	rs586088	T	A	0.5	0.56	0.22	exonic	LIPT2	nonsynonymous SNV	P+K-	PK	0.007305	0.05611
22_44287062	rs2071884	A	G	0.44	0.56	0.22	exonic	PNPLA5	synonymous SNV	P+K-	PK	0.007305	0.05371
12_27952620	rs17801400	T	G	0.41	0.39	0.08	UTR3	KLHL42	.	P+K-	PK	0.007446	0.02802
16_66646591	rs3743719	C	T	0.58	0.62	0.28	UTR3	CMTM3	.	P+K-	PK	0.007646	0.03318
4_46926605	rs12506608	T	C	0.17	0.44	0.14	UTR3	GABRA4	.	P+K-	PK	0.007654	0.04432
1_120165826	rs12076924	C	T	0.44	0.86	0.56	exonic	ZNF697	synonymous SNV	P+K-	PK	0.007681	0.03916
10_60027615	rs2993833	G	A	0.21	0.44	0.14	UTR5	IPMK	.	P+K-	PK	0.007681	0.0184
19_59085161	rs61012884	A	G	0.14	0.44	0.14	ncRNA_exonic	MZF1-AS1	.	P+K-	PK	0.007681	0.09423
16_88874778	rs15829	C	T	0.18	0.54	0.15	UTR3	CDT1	.	P+K-	PK	0.007793	0.009386
19_43766044	rs115363320	C	A	0.11	0.2	0	exonic	PSG9	nonsynonymous SNV	P+K-	PK	0.00792	0.1049
21_47836216	rs60444527	A	G	0.03	0.2	0	exonic	PCNT	synonymous SNV	P+K-	PK	0.00792	0.04989
10_78635278	rs1897594	A	T	0.44	0.75	0.42	UTR3	KCNMA1	.	P+K-	PK	0.008046	0.05851
15_74923335	rs1128628	G	C	0.36	0.58	0.25	UTR3	EDC3	.	P+K-	PK	0.008046	0.05054
19_54544177	rs1035829	C	T	0.44	0.58	0.25	UTR3	VSTM1	.	P+K-	PK	0.008046	0.1528
22_30782089	rs5997629	A	G	0.53	0.58	0.25	exonic	RNF215	synonymous SNV	P+K-	PK	0.008046	0.05851
5_112257908	rs153556	T	C	0.42	0.58	0.25	UTR5	REEP5	.	P+K-	PK	0.008046	0.05371
18_76829525	rs4078115	A	G	0.28	0.47	0.16	exonic	ATP9B	nonsynonymous SNV	P+K-	PK	0.008265	0.03169
22_30793137	rs757660	G	A	0.36	0.47	0.16	exonic	SEC14L2	nonsynonymous SNV	P+K-	PK	0.008265	0.03778
11_89584074	rs202120948	T	C	0.04	0.35	0.08	ncRNA_exonic	TRIM53AP	.	P+K-	PK	0.008292	0.03315
5_137733891	rs17294563	A	G	0.11	0.35	0.08	exonic	KDM3B	synonymous SNV	P+K-	PK	0.008292	0.05943
6_32609855	rs1048173	A	C	0.19	0.35	0.08	exonic	HLA-DQA1	synonymous SNV	P+K-	PK	0.008292	0.032
12_56844349	rs3809125	C	T	0.58	0.67	0.31	UTR3	MIP	.	P+K-	PK	0.008324	0.03022
8_145752467	rs2721142	A	T	0.41	0.75	0.39	UTR3	C8orf82	.	P+K-	PK	0.008338	0.0191
6_32486358	.	T	C	0.05	0.5	0.14	exonic	HLA-DRB5	synonymous SNV	P+K-	PK	0.00837	0.01137
12_91348786	rs3803099	G	T	0.75	0.83	0.46	UTR5	CCER1	.	P+K-	PK	0.008462	0.0243
6_132030560	rs200750273	G	A	0.07	0.25	0	exonic	CTAGE9	nonsynonymous SNV	P+K-	PK	0.00847	0.0426
11_1651120	rs66665994	G	T	0.24	0.5	0.18	exonic	KRTAP5-5	nonsynonymous SNV	P+K-	PK	0.008502	0.01859
1_201299748	rs10920174	G	A	0.71	0.72	0.39	UTR3	PKP1	.	P+K-	PK	0.008596	0.04722
1_27680292	rs8533	A	G	0.47	0.72	0.39	exonic	SYTL1	synonymous SNV	P+K-	PK	0.008596	0.05851
11_126081403	rs2282580	T	C	0.53	0.72	0.39	exonic	RPUSD4	nonsynonymous SNV	P+K-	PK	0.008596	0.05851
11_26705310	rs3924551	A	G	0.61	0.72	0.39	exonic	SLC5A12	synonymous SNV	P+K-	PK	0.008596	0.09353
18_56202768	rs3809983	C	A	0.42	0.61	0.28	exonic	ALPK2	nonsynonymous SNV	P+K-	PK	0.008596	0.09353
18_56203074	rs3809982	G	A	0.42	0.61	0.28	exonic	ALPK2	nonsynonymous SNV	P+K-	PK	0.008596	0.09353
18_56203120	rs3809981	C	T	0.42	0.61	0.28	exonic	ALPK2	synonymous SNV	P+K-	PK	0.008596	0.09353
5_96231000	rs2549782	G	T	0.56	0.61	0.28	exonic	ERAP2	nonsynonymous SNV	P+K-	PK	0.008596	0.05851
1_156564922	rs3795733	C	T	0.44	0.44	0.14	UTR3	GPATCH4	.	P+K-	PK	0.008624	0.08497
1_200521131	rs10737572	T	C	0.81	0.86	0.56	UTR3	KIF14	.	P+K-	PK	0.008624	0.1073
1_200558363	rs6665951	T	C	0.81	0.86	0.56	exonic	KIF14	synonymous SNV	P+K-	PK	0.008624	0.1073
1_203311216	rs3738022	T	C	0.29	0.44	0.14	UTR3	FMOD	.	P+K-	PK	0.008624	0.06554
13_19687857	rs12857601	G	A	0.25	0.44	0.14	ncRNA_exonic	LOC107984132	.	P+K-	PK	0.008624	0.1073
16_20410488	rs7185940	G	A	0.36	0.44	0.14	exonic	PDILT	synonymous SNV	P+K-	PK	0.008624	0.07907
9_100038858	rs7867330	A	G	0.75	0.86	0.56	ncRNA_exonic	SUGT1P4-STRA6LP,SUGT1P4-STRA6LP-CCDC180	.	P+K-	PK	0.008624	0.04198
20_49639463	rs6020918	T	C	0.58	0.69	0.36	UTR5	KCNG1	.	P+K-	PK	0.008627	0.01787
20_25744133	rs2996702	T	A	0.09	0.35	0.04	ncRNA_exonic	FAM182B	.	P+K-	PK	0.008657	0.03208
19_21477431	rs1781873	T	C	0.56	0.74	0.42	exonic	ZNF708	nonsynonymous SNV	P+K-	PK	0.008707	0.06084
3_49156676	rs4279134	A	G	0.81	0.96	0.71	UTR5	USP19	.	P+K-	PK	0.008707	0.02587
21_37432910	rs7280136	C	G	0.42	0.46	0.13	upstream	SETD4	.	P+K-	PK	0.00871	0.03172
16_31489033	rs13143	C	T	0.07	0.32	0	UTR3	TGFB1I1	.	P+K-	PK	0.008901	0.01374
1_22445991	rs3765351	C	T	0.58	0.64	0.31	UTR3	WNT4	.	P+K-	PK	0.008935	0.05851
13_44596526	rs4418956	A	G	0.56	0.64	0.31	ncRNA_exonic	NRAD1	.	P+K-	PK	0.008935	0.0541
19_21541806	rs2012013	T	C	0.58	0.69	0.36	UTR5	ZNF738	.	P+K-	PK	0.008935	0.09619
19_21569099	rs11085447	C	T	0.58	0.69	0.36	UTR3	ZNF738	.	P+K-	PK	0.008935	0.09619
22_44282276	rs739231	A	G	0.67	0.69	0.36	exonic	PNPLA5	nonsynonymous SNV	P+K-	PK	0.008935	0.08979
22_44282307	rs739232	G	A	0.67	0.69	0.36	exonic	PNPLA5	synonymous SNV	P+K-	PK	0.008935	0.08979
22_51021599	rs131756	C	T	0.61	0.69	0.36	ncRNA_exonic	CHKB-DT	.	P+K-	PK	0.008935	0.05771
4_175239997	rs113877410	A	G	0.56	0.69	0.36	UTR3	CEP44	.	P+K-	PK	0.008935	0.06084
4_167024905	rs1497948	T	C	0.5	0.53	0.21	UTR3	TLL1	.	P+K-	PK	0.009141	0.01294
12_123470586	rs12828755	C	T	0.12	0.21	0	exonic	PITPNM2	synonymous SNV	P+K-	PK	0.009276	0.06275
10_103315178	rs4919552	G	A	0.25	0.36	0.08	UTR3	BTRC	.	P+K-	PK	0.009279	0.07208
12_117669914	rs3741475	G	A	0.19	0.36	0.08	exonic	NOS1	synonymous SNV	P+K-	PK	0.009279	0.1348
2_191366707	rs1128723	A	G	0.18	0.36	0.08	UTR3	MFSD6	.	P+K-	PK	0.009279	0.06405
4_48496368	rs17472127	A	G	0.22	0.36	0.08	UTR3	ZAR1	.	P+K-	PK	0.009279	0.06404
9_34329110	rs7875342	C	G	0.19	0.36	0.08	UTR5	KIF24	.	P+K-	PK	0.009279	0.07949
20_16252917	rs1052634	C	A	0.42	0.61	0.29	UTR3	KIF16B	.	P+K-	PK	0.009376	0.08758
2_55862440	rs782651	T	C	0.75	1	0.71	UTR3	PNPT1	.	P+K-	PK	0.009401	0.009834
1_39992808	rs1180341	T	C	0.68	0.93	0.61	ncRNA_UTR3	BMP8A	.	P+K-	PK	0.009531	0.02467
16_57399638	rs658559	G	A	0.31	0.54	0.18	UTR3	CCL22	.	P+K-	PK	0.00965	0.01628
1_247200207	rs12734033	T	C	0.22	0.29	0	ncRNA_UTR3	ZNF670	.	P+K-	PK	0.009653	0.01966
4_66189260	rs7688795	C	G	0.93	1	0.8	UTR3	EPHA5	.	P+K-	PK	0.009659	0.02398
7_100371100	rs2734880	C	A	0.44	0.56	0.22	exonic	ZAN	unknown	P+K-	PK	0.009735	0.03522
19_17394124	rs2363956	T	G	0.5	0.64	0.32	exonic	ANKLE1	nonsynonymous SNV	P+K-	PK	0.009835	0.03038
14_105289827	rs12894160	C	T	0.45	0.41	0.05	ncRNA_exonic	LINC00638	.	P+K-	PK	0.009837	0.01613
21_45180380	rs3211246	A	G	0.03	0.19	0	UTR3	PDXK	.	P+K-	PK	0.009974	0.04913
3_197804128	rs61754923	G	A	0.06	0.19	0	ncRNA_exonic	ANKRD18DP	.	P+K-	PK	0.009974	0.1071
6_32973743	rs3129304	C	T	0.97	1	0.81	UTR3	HLA-DOA	.	P+K-	PK	0.009974	0.05813
16_23360199	rs238547	T	C	0.78	1	0.72	exonic	SCNN1B	synonymous SNV	P+K-	PK	0.01007	0.02621
1_38463504	rs7366048	C	T	0.5	0.57	0.24	exonic	FHL3	synonymous SNV	P+K-	PK	0.0101	0.07515
2_225244923	rs3738953	A	G	0.17	0.41	0.11	exonic	FAM124B	synonymous SNV	P+K-	PK	0.01024	0.06942
17_20353194	rs547451535	C	T	0.06	0.18	0	UTR3	LGALS9B	.	P+K-	PK	0.01026	0.05058
2_37208479	rs11675109	G	A	0.14	0.18	0	UTR3	HEATR5B	.	P+K-	PK	0.01026	0.1065
21_47988046	rs9941895	T	C	0.03	0.18	0	UTR3	DIP2A	.	P+K-	PK	0.01026	0.05813
3_108096578	rs59960264	G	C	0.06	0.18	0	UTR3	HHLA2	.	P+K-	PK	0.01026	0.1071
3_129269961	rs3736170	T	C	0.06	0.18	0	exonic	H1FOO	synonymous SNV	P+K-	PK	0.01026	0.05058
3_50340996	rs28365992	T	C	0.19	0.18	0	UTR5	HYAL1	.	P+K-	PK	0.01026	0.04263
6_30711026	rs1049943	C	G	0.19	0.18	0	ncRNA_exonic	IER3-AS1	.	P+K-	PK	0.01026	0.04263
6_30711031	rs17719	C	T	0.17	0.18	0	ncRNA_exonic	IER3-AS1	.	P+K-	PK	0.01026	0.02813
7_5661636	rs852437	C	T	0.15	0.18	0	UTR3	RNF216	.	P+K-	PK	0.01026	0.05339
9_137331106	rs14317	C	A	0.03	0.18	0	UTR3	RXRA	.	P+K-	PK	0.01026	0.05414
8_6913031	rs2272719	G	A	0.29	0.5	0.19	exonic	DEFA5	synonymous SNV	P+K-	PK	0.01059	0.06521
8_56363918	rs2975986	G	C	0.11	0.47	0.17	ncRNA_exonic	SBF1P1	.	P+K-	PK	0.01065	0.055
8_56364087	rs2975985	G	A	0.11	0.47	0.17	ncRNA_exonic	SBF1P1	.	P+K-	PK	0.01065	0.055
1_3663641	rs75438821	C	T	0.25	0.23	0	ncRNA_exonic	TP73-AS1	.	P+K-	PK	0.01071	0.06246
10_72191952	rs2279253	A	G	0.25	0.62	0.23	UTR3	NODAL	.	P+K-	PK	0.01075	0.01821
4_111398208	rs10004516	A	G	0.86	0.85	0.43	exonic	ENPEP	nonsynonymous SNV	P+K-	PK	0.01076	0.01351
1_12820870	rs1132185	T	C	0.72	0.88	0.59	exonic	C1orf158	nonsynonymous SNV	P+K-	PK	0.0108	0.04014
11_130080017	rs704624	C	T	0.8	0.88	0.59	UTR3	ST14	.	P+K-	PK	0.0108	0.02017
15_70341337	rs61999924	A	G	0.19	0.29	0.06	UTR3	TLE3	.	P+K-	PK	0.01082	0.04263
5_176057378	rs113812814	G	A	0.22	0.29	0.06	UTR5	SNCB	.	P+K-	PK	0.01082	0.1062
20_61977335	rs45624232	A	G	0.18	0.22	0	UTR3	CHRNA4	.	P+K-	PK	0.01084	0.01534
22_24036657	rs2070448	T	C	0.03	0.22	0	ncRNA_exonic	GUSBP11	.	P+K-	PK	0.01084	0.04913
20_40706295	rs877431	T	C	0.1	0.29	0	UTR3	PTPRT	.	P+K-	PK	0.01095	0.02401
13_48650492	rs41284209	A	G	0.04	0.22	0	UTR3	MED4	.	P+K-	PK	0.01098	0.043
21_47836206	rs35978208	A	C	0.06	0.22	0	exonic	PCNT	nonsynonymous SNV	P+K-	PK	0.01098	0.04989
5_150407935	rs8177448	G	A	0.09	0.22	0	UTR3	GPX3	.	P+K-	PK	0.01098	0.02586
17_9801324	rs887259	C	T	0.04	0.29	0	UTR3	RCVRN	.	P+K-	PK	0.01105	0.02318
6_32485342	rs185406567	G	A	0.19	0.29	0	UTR3	HLA-DRB5	.	P+K-	PK	0.01105	0.01374
1_151372047	rs2296840	C	T	0.06	0.21	0	upstream	PSMB4	.	P+K-	PK	0.0111	0.08024
1_160394937	rs17380127	A	C	0.28	0.21	0	exonic	VANGL2	synonymous SNV	P+K-	PK	0.0111	0.0352
1_47011372	rs752704	T	C	0.35	0.54	0.18	ncRNA_UTR3	KNCN	.	P+K-	PK	0.01115	0.02371
5_134782510	rs12520809	T	C	0.43	0.5	0.17	exonic	DCANP1	nonsynonymous SNV	P+K-	PK	0.01116	0.02725
9_107367431	rs1851716	A	T	0.22	0.21	0	exonic	OR13C2	nonsynonymous SNV	P+K-	PK	0.01123	0.04137
16_8889533	rs1864	T	C	0.35	0.58	0.21	UTR3	TMEM186	.	P+K-	PK	0.01126	0.02245
1_228347352	rs6668719	A	G	0.94	1	0.81	UTR3	GJC2	.	P+K-	PK	0.01133	0.1065
10_106027059	rs11509438	G	A	0.11	0.19	0	exonic	GSTO1	nonsynonymous SNV	P+K-	PK	0.01133	0.1514
15_34818124	rs34407417	A	C	0.03	0.19	0	UTR3	GOLGA8B	.	P+K-	PK	0.01133	0.1065
15_34818128	rs36006600	A	G	0.03	0.19	0	UTR3	GOLGA8B	.	P+K-	PK	0.01133	0.1065
17_47657824	rs2537730	A	C	0.89	1	0.81	UTR3	NXPH3	.	P+K-	PK	0.01133	0.1514
18_77724726	rs8095764	A	C	0.11	0.19	0	UTR5	HSBP1L1	.	P+K-	PK	0.01133	0.05527
2_220032934	rs372823671	C	G	0.08	0.19	0	exonic	SLC23A3	nonsynonymous SNV	P+K-	PK	0.01133	0.05527
2_227871797	rs56196639	G	A	0.19	0.19	0	UTR3	COL4A4	.	P+K-	PK	0.01133	0.1514
2_33952995	rs77056394	C	G	0.14	0.19	0	ncRNA_exonic	MYADML	.	P+K-	PK	0.01133	0.1514
20_42331457	rs2070235	A	G	0.11	0.19	0	exonic	MYBL2	nonsynonymous SNV	P+K-	PK	0.01133	0.1514
4_699645	rs80100206	C	T	0.25	0.19	0	UTR5	PCGF3	.	P+K-	PK	0.01133	0.0847
5_82833391	rs16900528	A	G	0.08	0.19	0	exonic	VCAN	synonymous SNV	P+K-	PK	0.01133	0.1514
6_16328068	rs2072736	T	C	0.11	0.19	0	exonic	ATXN1	nonsynonymous SNV	P+K-	PK	0.01133	0.05389
6_30692539	rs1061397	C	T	0.19	0.19	0	UTR3	TUBB	.	P+K-	PK	0.01133	0.05527
6_30695920	rs1136719	C	T	0.19	0.19	0	exonic	FLOT1	synonymous SNV	P+K-	PK	0.01133	0.05527
7_127638722	rs17733783	A	G	0.03	0.19	0	ncRNA_exonic	SND1-IT1	.	P+K-	PK	0.01133	0.1145
7_29553368	rs16875072	C	A	0.06	0.19	0	UTR3	CHN2	.	P+K-	PK	0.01133	0.1065
8_144735347	rs921669	C	T	0.08	0.19	0	UTR3	ZNF623	.	P+K-	PK	0.01133	0.1514
8_76477529	rs17306807	C	T	0.08	0.19	0	UTR3	HNF4G	.	P+K-	PK	0.01133	0.1065
8_76477628	rs17398054	T	C	0.08	0.19	0	UTR3	HNF4G	.	P+K-	PK	0.01133	0.1065
9_77376633	rs2274925	A	G	0.06	0.19	0	exonic	TRPM6	synonymous SNV	P+K-	PK	0.01133	0.1145
19_17432355	rs2363963	A	G	0.77	0.71	0.37	UTR3	DDA1	.	P+K-	PK	0.01136	0.01848
6_44222047	rs3187	G	A	0.08	0.25	0	UTR3	SLC35B2	.	P+K-	PK	0.01144	0.01356
4_91702075	rs6532242	A	T	0.68	0.71	0.38	UTR3	CCSER1	.	P+K-	PK	0.01158	0.02262
9_72741247	rs2296772	C	T	0.25	0.38	0.11	exonic	MAMDC2	synonymous SNV	P+K-	PK	0.01167	0.05943
8_11995939	rs376720096	G	A	0.03	0.22	0	exonic	USP17L2	nonsynonymous SNV	P+K-	PK	0.01178	0.04313
15_40380852	rs2242186	G	A	0.18	0.25	0.03	UTR3	BMF	.	P+K-	PK	0.01184	0.04458
8_12612666	rs369543401	G	A	0.06	0.21	0	exonic	LONRF1	synonymous SNV	P+K-	PK	0.01194	0.04962
1_120165125	rs3795661	G	A	0.25	0.31	0.06	UTR3	ZNF697	.	P+K-	PK	0.01201	0.07949
1_248039294	rs1339847	G	A	0.06	0.31	0.06	exonic	TRIM58	nonsynonymous SNV	P+K-	PK	0.01201	0.1065
11_123886320	rs12224056	A	G	0.14	0.31	0.06	exonic	OR10G4	synonymous SNV	P+K-	PK	0.01201	0.02493
12_93963873	rs2200160	C	T	0.08	0.31	0.06	ncRNA_UTR5	SOCS2	.	P+K-	PK	0.01201	0.0847
2_15747393	rs10929378	C	T	0.81	0.94	0.69	exonic	DDX1	synonymous SNV	P+K-	PK	0.01201	0.0632
2_176794388	rs2289966	C	T	0.17	0.31	0.06	UTR3	LNPK	.	P+K-	PK	0.01201	0.0457
21_15481168	rs62208635	C	A	0.19	0.31	0.06	UTR3	LIPI	.	P+K-	PK	0.01201	0.0847
22_50171906	rs7291527	T	C	0.22	0.31	0.06	intronic	BRD1	.	P+K-	PK	0.01201	0.1348
22_50172226	rs4823961	G	A	0.22	0.31	0.06	intronic	BRD1	.	P+K-	PK	0.01201	0.1348
22_50173910	rs4824095	A	T	0.22	0.31	0.06	intronic	BRD1	.	P+K-	PK	0.01201	0.1348
22_50187853	rs35331092	C	T	0.14	0.31	0.06	exonic	BRD1	nonsynonymous SNV	P+K-	PK	0.01201	0.1113
22_50218299	rs77949691	G	C	0.25	0.31	0.06	intronic	BRD1	.	P+K-	PK	0.01201	0.09423
4_106552414	rs2044536	A	G	0.11	0.31	0.06	UTR3	ARHGEF38	.	P+K-	PK	0.01201	0.1514
9_139378518	rs11793840	C	T	0.12	0.19	0	UTR5	C9orf163	.	P+K-	PK	0.01204	0.01333
21_14415250	rs3114244	A	G	0.14	0.19	0	ncRNA_exonic	ANKRD30BP2	.	P+K-	PK	0.01208	0.0123
21_14415259	rs3114242	A	G	0.14	0.19	0	ncRNA_exonic	ANKRD30BP2	.	P+K-	PK	0.01208	0.0123
14_21526079	rs12437266	C	T	0.27	0.59	0.26	exonic	RNASE8	nonsynonymous SNV	P+K-	PK	0.01214	0.04296
19_51600921	rs10403942	G	A	0.36	0.59	0.18	UTR3	CTU1	.	P+K-	PK	0.01216	0.01704
4_4249484	rs2916465	A	C	0.5	0.46	0.16	UTR5	TMEM128	.	P+K-	PK	0.0122	0.01644
10_17156151	rs1801222	A	G	0.69	0.97	0.76	exonic	CUBN	nonsynonymous SNV	P+K-	PK	0.0123	0.02423
12_113409981	rs7138267	C	T	0.11	0.24	0.03	UTR3	OAS3	.	P+K-	PK	0.0123	0.08024
19_22849769	rs62118832	G	A	0	0.24	0.03	UTR3	ZNF492	.	P+K-	PK	0.0123	0.1065
2_37035945	rs2072525	C	A	0.22	0.24	0.03	exonic	VIT	nonsynonymous SNV	P+K-	PK	0.0123	0.0632
6_32489822	rs115417906	C	T	0.17	0.24	0.03	exonic	HLA-DRB5	nonsynonymous SNV	P+K-	PK	0.0123	0.02383
9_27567145	rs10757668	C	T	0.19	0.24	0.03	UTR5	C9orf72	.	P+K-	PK	0.0123	0.0847
9_45727981	.	G	C	0.75	0.83	0.45	intergenic	LOC107984035(dist=162857),FAM27E2(dist=388962)	.	P+K-	PK	0.0124	0.01622
20_61287727	rs3187081	G	A	0.65	0.73	0.41	UTR5	SLCO4A1	.	P+K-	PK	0.01243	0.04647
1_229569803	rs605430	A	G	0.67	0.81	0.5	UTR5	ACTA1	.	P+K-	PK	0.01253	0.07907
1_229569804	rs605428	G	A	0.67	0.81	0.5	UTR5	ACTA1	.	P+K-	PK	0.01253	0.07907
12_49230035	rs1057908	T	G	0.33	0.5	0.19	exonic	DDX23	synonymous SNV	P+K-	PK	0.01253	0.07907
12_70913818	rs630608	A	G	0.31	0.5	0.19	UTR3	PTPRB	.	P+K-	PK	0.01253	0.07208
13_28197436	rs7097	C	T	0.31	0.5	0.19	UTR3	POLR1D	.	P+K-	PK	0.01253	0.1073
21_37851975	rs188733	C	G	0.19	0.5	0.19	UTR5	CLDN14	.	P+K-	PK	0.01253	0.07907
21_37852001	rs219742	T	C	0.21	0.5	0.19	UTR5	CLDN14	.	P+K-	PK	0.01253	0.06797
5_96211741	rs1230358	T	G	0.69	0.81	0.5	UTR5	ERAP2	.	P+K-	PK	0.01253	0.1285
11_64789194	rs664226	T	C	0.29	0.39	0.09	exonic	ARL2	nonsynonymous SNV	P+K-	PK	0.01259	0.02194
3_102198169	rs7647414	A	G	0.68	0.73	0.38	UTR3	ZPLD1	.	P+K-	PK	0.01261	0.01801
1_144619903	rs71527379	T	A	0.71	0.78	0.47	exonic	NBPF8,NBPF9	unknown	P+K-	PK	0.01281	0.02098
6_39563863	rs7738892	C	T	0.17	0.53	0.22	exonic	KIF6	synonymous SNV	P+K-	PK	0.01281	0.06404
12_53186122	rs4432093	G	A	0.53	0.75	0.39	exonic	KRT3	synonymous SNV	P+K-	PK	0.01288	0.01695
11_126147713	rs594318	C	G	0.44	0.39	0.11	UTR3	FOXRED1	.	P+K-	PK	0.01295	0.04661
13_19687814	rs12869644	T	C	0.25	0.39	0.11	ncRNA_exonic	LOC107984132	.	P+K-	PK	0.01295	0.09423
14_80330132	rs12879016	G	T	0.92	0.89	0.61	UTR3	NRXN3	.	P+K-	PK	0.01295	0.07949
6_29759517	rs1610717	G	A	0.5	0.39	0.11	ncRNA_exonic	HCG4	.	P+K-	PK	0.01295	0.04661
8_37821486	rs4998	C	G	0.15	0.39	0.11	UTR3	ADRB3	.	P+K-	PK	0.01295	0.06405
9_140611436	rs3812497	T	C	0.39	0.39	0.11	exonic	EHMT1	synonymous SNV	P+K-	PK	0.01295	0.07208
19_1481481	rs1047854	G	A	0.47	0.5	0.21	UTR3	PCSK4	.	P+K-	PK	0.01321	0.03408
4_184560790	rs67505753	G	A	0.19	0.39	0.12	UTR3	RWDD4	.	P+K-	PK	0.01339	0.0451
8_11994957	rs12543578	T	C	0.34	0.62	0.3	exonic	USP17L2	nonsynonymous SNV	P+K-	PK	0.01355	0.02519
10_78630497	rs10762732	T	C	0.38	0.74	0.41	UTR3	KCNMA1	.	P+K-	PK	0.01356	0.05146
10_73822343	rs3088251	T	C	0.33	0.25	0.03	UTR3	SPOCK2	.	P+K-	PK	0.01359	0.0451
14_52781341	rs1353410	A	T	0.08	0.25	0.03	exonic	PTGER2	synonymous SNV	P+K-	PK	0.01359	0.1065
16_90110195	rs3743823	C	T	0.17	0.25	0.03	ncRNA_exonic	URAHP	.	P+K-	PK	0.01359	0.1113
18_14543039	rs45570841	T	C	0.14	0.25	0.03	exonic	POTEC	nonsynonymous SNV	P+K-	PK	0.01359	0.1514
19_22848028	rs3745115	G	C	0	0.25	0.03	exonic	ZNF492	nonsynonymous SNV	P+K-	PK	0.01359	0.1145
19_22940046	rs35012661	C	A	0	0.25	0.03	UTR3	ZNF99	.	P+K-	PK	0.01359	0.1145
19_22940659	rs59621958	C	T	0	0.25	0.03	exonic	ZNF99	synonymous SNV	P+K-	PK	0.01359	0.1145
19_22941617	rs58653025	T	C	0	0.25	0.03	exonic	ZNF99	nonsynonymous SNV	P+K-	PK	0.01359	0.1145
19_39215172	rs12986337	T	C	0.11	0.25	0.03	exonic	ACTN4	synonymous SNV	P+K-	PK	0.01359	0.1065
19_7853783	rs62125080	C	T	0.06	0.25	0.03	ncRNA_exonic	CLEC4GP1	.	P+K-	PK	0.01359	0.1514
19_7855781	rs10418839	G	A	0.08	0.25	0.03	ncRNA_exonic	CLEC4GP1	.	P+K-	PK	0.01359	0.1514
19_8503345	rs34099346	G	C	0.14	0.25	0.03	exonic	MARCHF2	nonsynonymous SNV	P+K-	PK	0.01359	0.0457
2_153511976	rs17400436	A	G	0.08	0.25	0.03	UTR3	PRPF40A	.	P+K-	PK	0.01359	0.1065
2_37041439	rs11901202	C	T	0.25	0.25	0.03	exonic	VIT	nonsynonymous SNV	P+K-	PK	0.01359	0.0847
20_23062927	rs2749812	A	G	0.92	0.97	0.75	UTR3	CD93	.	P+K-	PK	0.01359	0.1065
3_39226114	rs34810344	G	A	0.17	0.25	0.03	exonic	XIRP1	nonsynonymous SNV	P+K-	PK	0.01359	0.0847
5_160719152	rs1644439	G	A	0.06	0.25	0.03	UTR3	GABRB2	.	P+K-	PK	0.01359	0.05184
5_236653	rs75091805	C	A	0.19	0.25	0.03	exonic	SDHA	synonymous SNV	P+K-	PK	0.01359	0.1514
5_62071280	rs12654142	A	G	0.11	0.25	0.03	intergenic	IPO11(dist=146864),HTR1A(dist=1184595)	.	P+K-	PK	0.01359	0.0847
6_31465899	rs2516498	G	C	0.22	0.25	0.03	intronic	MICB	.	P+K-	PK	0.01359	0.0457
9_129459181	rs71497630	C	T	0.22	0.25	0.03	UTR3	LMX1B	.	P+K-	PK	0.01359	0.0632
19_929753	rs1799595	A	G	0.89	0.88	0.58	exonic	ARID3A	synonymous SNV	P+K-	PK	0.01363	0.05152
6_32522683	rs35373206	C	A	0.59	0.88	0.58	ncRNA_exonic	HLA-DRB6	.	P+K-	PK	0.01363	0.02462
1_161172233	rs11538340	C	A	0.15	0.31	0.06	exonic	NDUFS2	nonsynonymous SNV	P+K-	PK	0.01371	0.04014
6_125232434	rs67942759	G	A	0.12	0.31	0.06	ncRNA_exonic	RNF217-AS1	.	P+K-	PK	0.01371	0.04928
9_125239253	rs1962091	T	C	0.86	0.65	0.25	exonic	OR1J1	nonsynonymous SNV	P+K-	PK	0.01384	0.01883
4_146479247	rs34978105	C	A	0.08	0.3	0.04	UTR3	SMAD1	.	P+K-	PK	0.01407	0.0335
15_50642916	rs6493430	T	C	0.53	0.56	0.25	ncRNA_exonic	GABPB1-IT1	.	P+K-	PK	0.0141	0.05256
1_15724003	rs2253371	A	G	0.44	0.53	0.22	UTR3	FHAD1	.	P+K-	PK	0.01419	0.08979
11_74203004	rs3741128	G	A	0.44	0.53	0.22	UTR3	LIPT2	.	P+K-	PK	0.01419	0.08497
13_19626818	rs4608194	C	T	0.58	0.78	0.47	intergenic	LINC00442(dist=40044),LOC107984132(dist=21356)	.	P+K-	PK	0.01419	0.04661
13_19626928	rs6490946	C	T	0.58	0.78	0.47	intergenic	LINC00442(dist=40154),LOC107984132(dist=21246)	.	P+K-	PK	0.01419	0.04661
13_95281129	rs2298056	A	G	0.58	0.53	0.22	UTR3	GPR180	.	P+K-	PK	0.01419	0.08979
19_55598724	rs1054940	A	G	0.83	0.78	0.47	exonic	EPS8L1	nonsynonymous SNV	P+K-	PK	0.01419	0.07208
2_116510817	rs2053724	G	C	0.56	0.78	0.47	exonic	DPP10	nonsynonymous SNV	P+K-	PK	0.01419	0.05611
2_121010443	rs934722	A	T	0.69	0.78	0.47	UTR5	RALB	.	P+K-	PK	0.01419	0.04661
2_121050989	rs1065518	T	A	0.67	0.78	0.47	UTR3	RALB	.	P+K-	PK	0.01419	0.04661
2_233470843	rs7571133	G	A	0.42	0.53	0.22	UTR5	EFHD1	.	P+K-	PK	0.01419	0.08979
3_40469254	rs6773917	G	T	0.47	0.53	0.22	ncRNA_UTR3	ENTPD3	.	P+K-	PK	0.01419	0.05771
5_82833369	rs309559	A	G	0.56	0.53	0.22	exonic	VCAN	nonsynonymous SNV	P+K-	PK	0.01419	0.05851
5_82835724	rs160278	T	A	0.56	0.53	0.22	exonic	VCAN	nonsynonymous SNV	P+K-	PK	0.01419	0.05851
6_117881605	rs1759	A	T	0.67	0.78	0.47	UTR3	GOPC	.	P+K-	PK	0.01419	0.08497
6_142541259	rs225710	C	T	0.5	0.53	0.22	UTR3	VTA1	.	P+K-	PK	0.01419	0.08979
6_27418847	rs7509	T	G	0.81	0.78	0.47	UTR3	ZNF184	.	P+K-	PK	0.01419	0.1187
7_27779765	rs2237340	G	A	0.56	0.53	0.22	UTR5	TAX1BP1	.	P+K-	PK	0.01419	0.05611
8_107670141	rs2282510	G	A	0.19	0.53	0.22	UTR5	OXR1	.	P+K-	PK	0.01419	0.04661
11_44117122	rs3923808	G	A	0	0.25	0	UTR5	EXT2	.	P+K-	PK	0.01428	0.04712
15_53808157	rs8041208	C	T	0.41	0.61	0.25	UTR3	WDR72	.	P+K-	PK	0.01429	0.02429
17_45994094	rs2228251	T	C	0.23	0.7	0.29	exonic	SP2	synonymous SNV	P+K-	PK	0.01439	0.02154
17_54941516	rs1992554	C	T	0.5	0.72	0.41	UTR3	DGKE	.	P+K-	PK	0.01465	0.04294
1_39457006	rs12043492	C	T	0.69	0.96	0.67	UTR5	AKIRIN1	.	P+K-	PK	0.01469	0.02191
15_99503800	rs2016347	G	T	0.58	0.79	0.41	UTR3	IGF1R	.	P+K-	PK	0.0147	0.01877
15_90168108	rs894157	C	T	0.75	0.77	0.43	exonic	TICRR	nonsynonymous SNV	P+K-	PK	0.01496	0.02506
7_6370305	rs3750039	C	G	0.67	0.8	0.47	exonic	FAM220A	nonsynonymous SNV	P+K-	PK	0.01498	0.02043
13_19625693	rs11620266	A	G	0.56	0.76	0.47	intergenic	LINC00442(dist=38919),LOC107984132(dist=22481)	.	P+K-	PK	0.01504	0.02873
4_148463840	rs5335	G	C	0.53	0.76	0.47	UTR3	EDNRA	.	P+K-	PK	0.01504	0.05258
16_87364488	rs79224744	C	T	0.36	0.54	0.22	UTR3	FBXO31	.	P+K-	PK	0.01511	0.01727
2_241631886	rs375751722	C	G	0.14	0.4	0.04	exonic	AQP12A	synonymous SNV	P+K-	PK	0.01515	0.04435
3_121340536	rs4676684	T	C	0.35	0.35	0.04	exonic	FBXO40	nonsynonymous SNV	P+K-	PK	0.01536	0.02067
1_53972205	rs2296758	T	C	0.18	0.44	0.15	UTR3	GLIS1	.	P+K-	PK	0.01544	0.02055
2_47748292	rs2278139	A	G	0.34	0.44	0.15	exonic	KCNK12	synonymous SNV	P+K-	PK	0.01544	0.01804
10_78629795	rs4980113	C	G	0.44	0.75	0.44	UTR3	KCNMA1	.	P+K-	PK	0.01558	0.05771
12_56814653	rs2291739	G	A	0.67	0.75	0.44	exonic	TIMELESS	nonsynonymous SNV	P+K-	PK	0.01558	0.05611
15_90128966	rs11629584	C	T	0.39	0.56	0.25	exonic	TICRR	nonsynonymous SNV	P+K-	PK	0.01558	0.08497
19_55995272	rs11550705	G	A	0.56	0.56	0.25	exonic	ZNF628	synonymous SNV	P+K-	PK	0.01558	0.09619
19_57090343	rs28668141	A	G	0.25	0.56	0.25	UTR3	ZNF470	.	P+K-	PK	0.01558	0.08497
22_50297435	rs1321	T	C	0.53	0.56	0.25	UTR3	ALG12	.	P+K-	PK	0.01558	0.05611
7_5521219	rs10046576	T	C	0.89	1	0.79	UTR3	FBXL18	.	P+K-	PK	0.01563	0.02569
20_46284588	rs11547289	C	T	0.13	0.34	0.09	UTR3	NCOA3	.	P+K-	PK	0.01568	0.02587
12_124105226	rs3190836	A	T	0.1	0.29	0.03	UTR3	DDX55,EIF2B1	.	P+K-	PK	0.01572	0.02627
1_245849969	rs116468848	C	T	0.09	0.17	0	exonic	KIF26B	synonymous SNV	P+K-	PK	0.01595	0.04573
19_22847072	rs146300593	G	C	0	0.17	0	exonic	ZNF492	nonsynonymous SNV	P+K-	PK	0.01595	0.1142
10_30317838	rs7920686	A	G	0.3	0.38	0.09	exonic	JCAD	synonymous SNV	P+K-	PK	0.0164	0.03634
10_32095249	rs1044795	T	G	0.25	0.32	0.08	UTR3	ARHGAP12	.	P+K-	PK	0.0166	0.05152
11_33886294	rs2038602	A	G	0.31	0.42	0.14	exonic	LMO2	synonymous SNV	P+K-	PK	0.01664	0.1073
13_107822109	rs2182958	C	T	0.61	0.86	0.58	UTR3	FAM155A	.	P+K-	PK	0.01664	0.08497
16_89293271	rs28417933	A	C	0.64	0.86	0.58	exonic	ZNF778	nonsynonymous SNV	P+K-	PK	0.01664	0.1073
17_42225547	rs227584	A	C	0.28	0.42	0.14	exonic	C17orf53	nonsynonymous SNV	P+K-	PK	0.01664	0.09423
17_42255097	rs3826412	T	C	0.28	0.42	0.14	ncRNA_exonic	ASB16-AS1	.	P+K-	PK	0.01664	0.09423
17_42270291	rs8079310	A	G	0.28	0.42	0.14	UTR3	ATXN7L3	.	P+K-	PK	0.01664	0.09423
3_121345874	rs2840143	G	C	0.44	0.42	0.14	UTR3	FBXO40	.	P+K-	PK	0.01664	0.07208
3_136537916	rs1400263	C	T	0.68	0.86	0.58	UTR5	SLC35G2	.	P+K-	PK	0.01664	0.03174
3_136537975	rs1400262	G	A	0.72	0.86	0.58	UTR5	SLC35G2	.	P+K-	PK	0.01664	0.04198
3_136537977	rs1400261	A	G	0.72	0.86	0.58	UTR5	SLC35G2	.	P+K-	PK	0.01664	0.04198
3_21447799	rs430387	T	C	0.75	0.86	0.58	ncRNA_exonic	VENTXP7	.	P+K-	PK	0.01664	0.1073
3_21447834	rs440905	C	T	0.75	0.86	0.58	ncRNA_exonic	VENTXP7	.	P+K-	PK	0.01664	0.1073
3_21447896	rs800605	A	G	0.75	0.86	0.58	ncRNA_exonic	VENTXP7	.	P+K-	PK	0.01664	0.1073
4_54966667	rs3194383	C	T	0.69	0.86	0.58	exonic	GSX2	synonymous SNV	P+K-	PK	0.01664	0.07208
5_118174003	rs17144715	G	C	0.31	0.42	0.14	UTR3	DTWD2	.	P+K-	PK	0.01664	0.07208
8_107772391	rs1542644	T	A	0.11	0.42	0.14	UTR3	ABRA	.	P+K-	PK	0.01664	0.06404
8_107782335	rs11996457	G	A	0.11	0.42	0.14	exonic	ABRA	synonymous SNV	P+K-	PK	0.01664	0.06404
1_201299852	rs1105331	A	G	0.72	0.72	0.42	UTR3	PKP1	.	P+K-	PK	0.01666	0.05371
1_205027737	rs2275697	G	A	0.39	0.58	0.28	exonic	CNTN2	nonsynonymous SNV	P+K-	PK	0.01666	0.05611
1_75175886	rs3819946	T	C	0.53	0.58	0.28	exonic	CRYZ	nonsynonymous SNV	P+K-	PK	0.01666	0.09832
10_74035297	rs8316	C	T	0.56	0.72	0.42	UTR3	DDIT4	.	P+K-	PK	0.01666	0.09619
11_68030173	rs3802746	C	A	0.64	0.72	0.42	exonic	C11orf24	nonsynonymous SNV	P+K-	PK	0.01666	0.09619
17_54961660	rs2525990	A	G	0.44	0.72	0.42	ncRNA_exonic	MTVR2	.	P+K-	PK	0.01666	0.09779
2_227915832	rs1800517	G	A	0.72	0.72	0.42	exonic	COL4A4	nonsynonymous SNV	P+K-	PK	0.01666	0.05851
7_141420768	rs6967301	A	G	0.69	0.72	0.42	exonic	WEE2	synonymous SNV	P+K-	PK	0.01666	0.07907
4_75972812	rs10015446	A	G	0.32	0.5	0.15	UTR3	PARM1	.	P+K-	PK	0.0167	0.01779
4_109477456	rs7685807	G	A	0.63	0.53	0.21	ncRNA_exonic	RPL34-AS1	.	P+K-	PK	0.01677	0.02256
10_129882640	rs4568912	A	G	0.33	0.5	0.19	UTR3	PTPRE	.	P+K-	PK	0.01686	0.03303
17_48917609	rs36031777	C	T	0.27	0.5	0.19	exonic	WFIKKN2	synonymous SNV	P+K-	PK	0.01686	0.02445
2_224620902	rs7566324	A	G	0.1	0.28	0	UTR3	AP1S3	.	P+K-	PK	0.01707	0.0238
4_38023302	rs34119528	C	G	0.16	0.25	0.03	exonic	TBC1D1	synonymous SNV	P+K-	PK	0.01717	0.08406
1_183086757	rs2296292	A	C	0.64	0.69	0.39	exonic	LAMC1	synonymous SNV	P+K-	PK	0.01739	0.03205
10_24908686	rs3748222	T	C	0.33	0.61	0.31	exonic	ARHGAP21	nonsynonymous SNV	P+K-	PK	0.01739	0.08497
10_81806878	rs12242565	G	A	0.69	0.69	0.39	ncRNA_exonic	TMEM254-AS1	.	P+K-	PK	0.01739	0.05611
11_2870108	rs8234	A	G	0.69	0.69	0.39	ncRNA_UTR3	KCNQ1	.	P+K-	PK	0.01739	0.05611
11_2870165	rs10798	A	G	0.69	0.69	0.39	ncRNA_UTR3	KCNQ1	.	P+K-	PK	0.01739	0.05611
12_104167024	rs15918	T	C	0.42	0.61	0.31	UTR3	NT5DC3	.	P+K-	PK	0.01739	0.08979
15_90174789	rs9672286	C	T	0.47	0.61	0.31	exonic	KIF7	synonymous SNV	P+K-	PK	0.01739	0.08979
18_56204410	rs55910046	C	T	0.42	0.61	0.31	exonic	ALPK2	synonymous SNV	P+K-	PK	0.01739	0.09353
18_56204671	rs4940404	A	T	0.42	0.61	0.31	exonic	ALPK2	nonsynonymous SNV	P+K-	PK	0.01739	0.09353
18_56205262	rs12103986	A	C	0.42	0.61	0.31	exonic	ALPK2	nonsynonymous SNV	P+K-	PK	0.01739	0.09353
19_17392894	rs8100241	G	A	0.58	0.61	0.31	exonic	ANKLE1	nonsynonymous SNV	P+K-	PK	0.01739	0.03318
19_53889551	rs4595898	C	G	0.47	0.69	0.39	UTR3	ZNF525	.	P+K-	PK	0.01739	0.09779
20_23546639	rs2295564	T	G	0.44	0.61	0.31	exonic	CST9L	nonsynonymous SNV	P+K-	PK	0.01739	0.09619
20_23549166	rs6083172	C	A	0.44	0.61	0.31	upstream	CST9L	.	P+K-	PK	0.01739	0.09353
20_23549216	rs6083173	C	A	0.44	0.61	0.31	upstream	CST9L	.	P+K-	PK	0.01739	0.09353
22_50499964	rs137919	T	C	0.47	0.61	0.31	UTR3	MLC1	.	P+K-	PK	0.01739	0.05771
5_74656539	rs12916	T	C	0.5	0.61	0.31	UTR3	HMGCR	.	P+K-	PK	0.01739	0.0329
5_96232142	rs2548538	T	A	0.56	0.61	0.31	exonic	ERAP2	synonymous SNV	P+K-	PK	0.01739	0.05851
5_96237326	rs2287988	G	A	0.56	0.61	0.31	exonic	ERAP2	synonymous SNV	P+K-	PK	0.01739	0.05851
5_96249115	rs2255546	C	T	0.56	0.61	0.31	exonic	ERAP2	synonymous SNV	P+K-	PK	0.01739	0.05851
9_113006420	rs5843	A	G	0.78	0.69	0.39	UTR3	TXN	.	P+K-	PK	0.01739	0.05371
9_36169598	rs3739609	T	C	0.56	0.61	0.31	exonic	CCIN	synonymous SNV	P+K-	PK	0.01739	0.09779
1_236721610	rs2275688	G	A	0.39	0.67	0.36	exonic	HEATR1	synonymous SNV	P+K-	PK	0.01776	0.05851
1_77748664	rs1619903	C	T	0.53	0.64	0.33	intronic	AK5	.	P+K-	PK	0.01776	0.05771
17_46024660	rs7220104	A	C	0.28	0.64	0.33	UTR3	PNPO	.	P+K-	PK	0.01776	0.08497
17_4883818	rs238234	C	G	0.39	0.67	0.36	exonic	CAMTA2	nonsynonymous SNV	P+K-	PK	0.01776	0.09832
19_10676423	rs3745245	G	A	0.67	0.64	0.33	exonic	KRI1	synonymous SNV	P+K-	PK	0.01776	0.05371
19_10676681	rs3218222	T	C	0.67	0.64	0.33	UTR5	KRI1	.	P+K-	PK	0.01776	0.05371
19_17393530	rs8108174	T	A	0.61	0.64	0.33	exonic	ANKLE1	nonsynonymous SNV	P+K-	PK	0.01776	0.05371
4_175225452	rs4695918	G	A	0.56	0.67	0.36	exonic	CEP44	nonsynonymous SNV	P+K-	PK	0.01776	0.09779
5_63906901	rs1559261	A	C	0.39	0.64	0.33	UTR3	RGS7BP	.	P+K-	PK	0.01776	0.05771
7_120969769	rs2908004	G	A	0.5	0.64	0.33	exonic	WNT16	nonsynonymous SNV	P+K-	PK	0.01776	0.09619
7_120979089	rs2707466	C	T	0.5	0.64	0.33	exonic	WNT16	nonsynonymous SNV	P+K-	PK	0.01776	0.09619
7_63895488	rs7792478	G	A	0.5	0.67	0.36	ncRNA_exonic	YWHAEP1	.	P+K-	PK	0.01776	0.09619
1_27679954	rs1128918	G	A	0.29	0.5	0.2	exonic	SYTL1	synonymous SNV	P+K-	PK	0.01781	0.03585
2_242707833	rs4234096	C	T	0.63	0.91	0.65	UTR3	D2HGDH	.	P+K-	PK	0.01785	0.02719
1_200522039	rs4304619	T	G	0.43	0.59	0.27	UTR3	KIF14	.	P+K-	PK	0.0179	0.02268
3_112991959	rs11710894	C	T	0.17	0.25	0	exonic	BOC	synonymous SNV	P+K-	PK	0.01823	0.02428
1_182798081	rs41272518	T	C	0.25	0.33	0.08	UTR3	NPL	.	P+K-	PK	0.01824	0.06404
16_81161552	rs16954717	C	T	0.33	0.33	0.08	exonic	PKD1L2	unknown	P+K-	PK	0.01824	0.09423
16_81161569	rs75417926	T	G	0.33	0.33	0.08	exonic	PKD1L2	unknown	P+K-	PK	0.01824	0.09423
16_81161571	rs80097269	T	C	0.33	0.33	0.08	exonic	PKD1L2	unknown	P+K-	PK	0.01824	0.09423
16_89293614	rs4785626	A	G	0.67	0.92	0.67	exonic	ZNF778	synonymous SNV	P+K-	PK	0.01824	0.09423
16_89294511	rs28638280	C	T	0.67	0.92	0.67	exonic	ZNF778	synonymous SNV	P+K-	PK	0.01824	0.09423
2_175424429	rs7739	G	A	0.83	0.92	0.67	UTR3	WIPF1	.	P+K-	PK	0.01824	0.0451
2_183964169	rs2944346	G	A	0.17	0.33	0.08	UTR3	DUSP19	.	P+K-	PK	0.01824	0.0451
2_187692444	rs12612668	C	A	0.36	0.33	0.08	UTR3	ZSWIM2	.	P+K-	PK	0.01824	0.055
2_240116159	rs6739116	G	A	0.17	0.33	0.08	ncRNA_exonic	MGC16025	.	P+K-	PK	0.01824	0.0632
20_17596155	rs1132274	C	A	0.36	0.33	0.08	exonic	RRBP1	nonsynonymous SNV	P+K-	PK	0.01824	0.1073
3_168801495	rs1048604	C	A	0.25	0.33	0.08	UTR3	MECOM	.	P+K-	PK	0.01824	0.06404
3_49273996	rs12631989	C	T	0.83	0.92	0.67	exonic	CCDC36	synonymous SNV	P+K-	PK	0.01824	0.0847
4_184572218	rs73002706	G	A	0.11	0.33	0.08	exonic	RWDD4	unknown	P+K-	PK	0.01824	0.0847
5_114469724	rs17137481	T	C	0.19	0.33	0.08	exonic	TRIM36	nonsynonymous SNV	P+K-	PK	0.01824	0.09423
6_29911203	rs1059517	A	C	0.17	0.33	0.08	exonic	HLA-A	nonsynonymous SNV	P+K-	PK	0.01824	0.09423
6_29911225	rs1059536	A	G	0.17	0.33	0.08	exonic	HLA-A	nonsynonymous SNV	P+K-	PK	0.01824	0.09423
5_176726002	rs4976682	T	C	0.72	0.83	0.56	UTR3	NSD1	.	P+K-	PK	0.0184	0.02445
6_29759811	rs1611204	C	G	0.44	0.44	0.17	ncRNA_exonic	HCG4,HLA-V	.	P+K-	PK	0.0184	0.04346
12_49221622	rs1045340	G	A	0.36	0.47	0.18	exonic	CACNB3	synonymous SNV	P+K-	PK	0.01859	0.07265
16_89294184	rs4785627	G	A	0.67	0.91	0.67	exonic	ZNF778	synonymous SNV	P+K-	PK	0.01867	0.06404
1_201851565	.	A	G	0.04	0.17	0	UTR3	IPO9	.	P+K-	PK	0.01869	0.06299
18_77916414	rs7238232	G	C	0.09	0.17	0	ncRNA_UTR3	PARD6G	.	P+K-	PK	0.01869	0.04573
2_113404708	rs4849091	G	A	0.45	0.58	0.23	exonic	SLC20A1	synonymous SNV	P+K-	PK	0.01877	0.01943
1_236746443	rs2794768	C	T	0.25	0.68	0.39	exonic	HEATR1	synonymous SNV	P+K-	PK	0.01879	0.04722
16_89350038	rs2279348	G	A	0.56	0.68	0.39	exonic	ANKRD11	nonsynonymous SNV	P+K-	PK	0.01879	0.03022
20_34022387	rs224331	A	C	0.47	0.61	0.32	exonic	GDF5	nonsynonymous SNV	P+K-	PK	0.01879	0.03318
5_188719	rs17559144	T	C	0.47	0.61	0.32	UTR3	PLEKHG4B	.	P+K-	PK	0.01879	0.05771
6_30458064	rs1264457	G	A	0.5	0.68	0.39	exonic	HLA-E	nonsynonymous SNV	P+K-	PK	0.01879	0.09345
19_48345330	rs12982537	C	T	0.22	0.31	0.04	UTR3	CRX	.	P+K-	PK	0.01882	0.02264
2_129026227	rs3958533	G	T	0.18	0.28	0.06	exonic	HS6ST1	nonsynonymous SNV	P+K-	PK	0.01882	0.1124
9_135974079	rs1062356	G	C	0.88	0.83	0.56	exonic	RALGDS	synonymous SNV	P+K-	PK	0.01889	0.02423
9_111617341	rs3750467	A	G	0.13	0.32	0.07	exonic	ACTL7B	synonymous SNV	P+K-	PK	0.01895	0.02943
8_11995484	rs74614551	C	T	0.34	0.66	0.32	exonic	USP17L2	synonymous SNV	P+K-	PK	0.0191	0.0257
1_111957693	rs2485319	A	G	0.46	0.78	0.47	exonic	OVGP1	nonsynonymous SNV	P+K-	PK	0.01923	0.02036
20_17594801	rs8803	G	A	0.03	0.16	0	UTR3	RRBP1	.	P+K-	PK	0.01932	0.1145
6_30530203	rs61748658	A	G	0.06	0.16	0	exonic	PRR3	synonymous SNV	P+K-	PK	0.01932	0.05548
6_52055339	rs3748067	C	T	0.1	0.33	0.08	UTR3	IL17A	.	P+K-	PK	0.01969	0.03996
5_177031348	rs11537644	T	C	0.71	0.63	0.31	exonic	B4GALT7	synonymous SNV	P+K-	PK	0.01983	0.02914
17_3416555	rs7208811	C	A	0.2	0.38	0.11	UTR3	TRPV3	.	P+K-	PK	0.01984	0.02135
15_78288551	.	A	T	0.06	0.3	0.06	UTR3	TBC1D2B	.	P+K-	PK	0.02002	0.05342
18_11882676	rs640519	C	A	0.43	0.3	0.06	UTR3	GNAL,MPPE1	.	P+K-	PK	0.02002	0.04551
5_186630	rs13185214	C	G	0.37	0.54	0.19	UTR3	PLEKHG4B	.	P+K-	PK	0.02005	0.02527
16_1398818	rs4984817	G	C	0.88	1	0.79	UTR3	BAIAP3	.	P+K-	PK	0.02006	0.02296
1_1133254	rs12026794	G	A	0.32	0.44	0.17	UTR3	TTLL10	.	P+K-	PK	0.02018	0.07392
1_146767320	rs6537	A	G	0.69	0.83	0.56	UTR3	CHD1L	.	P+K-	PK	0.02018	0.1073
1_156564640	rs3795732	G	A	0.42	0.44	0.17	UTR3	GPATCH4	.	P+K-	PK	0.02018	0.08497
11_22834189	rs1055320	C	T	0.36	0.44	0.17	UTR3	GAS2	.	P+K-	PK	0.02018	0.07208
15_74328141	rs743581	G	T	0.17	0.44	0.17	exonic	PML	nonsynonymous SNV	P+K-	PK	0.02018	0.06404
17_18647539	rs62073745	G	A	0.5	0.83	0.56	UTR5	FBXW10	.	P+K-	PK	0.02018	0.05054
19_22942325	rs7255780	G	C	0.17	0.44	0.17	exonic	ZNF99	nonsynonymous SNV	P+K-	PK	0.02018	0.1073
2_39963667	rs8265	A	G	0.67	0.83	0.56	UTR3	THUMPD2	.	P+K-	PK	0.02018	0.07208
21_44837551	rs430552	G	A	0.62	0.83	0.56	exonic	SIK1,SIK1B	synonymous SNV	P+K-	PK	0.02018	0.04346
5_150632676	rs2277028	A	G	0.42	0.44	0.17	upstream	GM2A	.	P+K-	PK	0.02018	0.06404
6_32370835	rs2076523	T	C	0.31	0.44	0.17	exonic	BTNL2	nonsynonymous SNV	P+K-	PK	0.02018	0.07907
8_27950670	rs2305451	C	T	0.56	0.44	0.17	UTR5	ELP3	.	P+K-	PK	0.02018	0.07907
14_78139025	rs2267755	C	T	0.47	0.44	0.18	UTR3	ALKBH1	.	P+K-	PK	0.02098	0.08128
3_9798773	rs1052133	C	G	0.16	0.44	0.18	exonic	OGG1	nonsynonymous SNV	P+K-	PK	0.02098	0.03382
15_49448012	rs17435932	C	A	0.15	0.28	0.06	UTR5	GALK2	.	P+K-	PK	0.02099	0.05943
22_23657874	rs392389	A	G	0.13	0.29	0.04	UTR3	BCR	.	P+K-	PK	0.02104	0.0335
22_23657875	rs440531	A	C	0.13	0.29	0.04	UTR3	BCR	.	P+K-	PK	0.02104	0.0335
1_146714427	rs11588753	G	C	0.06	0.33	0.07	exonic	CHD1L	nonsynonymous SNV	P+K-	PK	0.02115	0.03996
15_90328551	rs10584	G	C	0.26	0.63	0.31	UTR3	ANPEP	.	P+K-	PK	0.02116	0.02341
5_137782335	rs1046576	G	A	0.23	0.38	0.12	UTR3	REEP2	.	P+K-	PK	0.02126	0.0327
11_6942726	rs10839659	G	C	0.32	0.5	0.21	exonic	OR2D3	nonsynonymous SNV	P+K-	PK	0.02142	0.03617
17_72691123	rs34071577	G	A	0.03	0.18	0	UTR3	CD300LF	.	P+K-	PK	0.02145	0.04826
21_45993819	rs233285	C	T	0.47	0.81	0.53	exonic	KRTAP10-4	nonsynonymous SNV	P+K-	PK	0.02145	0.02826
4_21851695	rs16871968	T	C	0.33	0.47	0.19	ncRNA_exonic	KCNIP4-IT1	.	P+K-	PK	0.02145	0.08047
14_106393921	rs34212309	C	A	0.14	0.27	0	ncRNA_exonic	FAM30A	.	P+K-	PK	0.02161	0.02428
15_24410204	rs1054983	A	G	0.17	0.26	0.06	ncRNA_exonic	PWRN2	.	P+K-	PK	0.02186	0.04626
15_82635183	rs62010119	A	C	0.03	0.26	0.06	exonic	GOLGA6L10	nonsynonymous SNV	P+K-	PK	0.02186	0.1065
16_4404857	rs12756	G	A	0.24	0.26	0.06	UTR3	CORO7	.	P+K-	PK	0.02186	0.04263
19_54544092	rs34886038	C	T	0.08	0.26	0.06	UTR3	VSTM1	.	P+K-	PK	0.02186	0.0457
8_12880538	rs75221088	A	G	0.19	0.26	0.06	UTR3	TRMT9B	.	P+K-	PK	0.02186	0.06405
10_135273463	rs731947	C	G	0.88	0.97	0.78	ncRNA_exonic	SCART1	.	P+K-	PK	0.02191	0.02981
16_21742179	rs139312489	C	T	0.08	0.22	0.03	exonic	OTOA	synonymous SNV	P+K-	PK	0.02191	0.05184
2_108925572	rs11689841	G	A	0.26	0.41	0.13	UTR3	SULT1C2	.	P+K-	PK	0.02194	0.03169
8_42263157	rs6773	T	C	0.19	0.31	0.06	UTR3	VDAC3	.	P+K-	PK	0.02214	0.02347
19_49425772	rs1532704	T	C	0.97	1	0.84	UTR3	NUCB1	.	P+K-	PK	0.02253	0.05813
20_62198713	rs3810490	G	A	0.18	0.16	0	exonic	HELZ2	synonymous SNV	P+K-	PK	0.02253	0.05184
15_41813279	rs3743031	C	T	0.36	0.35	0.11	exonic	RPAP1	synonymous SNV	P+K-	PK	0.02259	0.09423
17_18024013	rs2955366	A	G	0.81	0.89	0.65	exonic	MYO15A	synonymous SNV	P+K-	PK	0.02259	0.032
17_40466438	rs3744483	T	C	0.29	0.35	0.11	UTR3	STAT3	.	P+K-	PK	0.02259	0.03903
4_88584148	rs2615498	C	T	0.25	0.35	0.11	exonic	DMP1	synonymous SNV	P+K-	PK	0.02259	0.09423
6_131895144	rs2781667	C	T	0.31	0.35	0.11	UTR3	MED23	.	P+K-	PK	0.02259	0.04203
12_94964365	rs11107606	T	C	0.21	0.43	0.1	UTR3	TMCC3	.	P+K-	PK	0.02271	0.03386
8_6500751	rs2433149	C	G	0.36	0.5	0.22	ncRNA_UTR3	MCPH1	.	P+K-	PK	0.02276	0.03404
11_63677573	rs148805165	C	T	0.06	0.15	0	UTR3	MARK2	.	P+K-	PK	0.02299	0.09231
11_65547333	rs12146493	G	A	0.03	0.15	0	exonic	AP5B1	nonsynonymous SNV	P+K-	PK	0.02299	0.1015
13_30084535	rs2490264	A	C	0.97	1	0.85	UTR3	SLC7A1	.	P+K-	PK	0.02299	0.05813
15_62145889	rs75606182	T	C	0	0.15	0	UTR3	VPS13C	.	P+K-	PK	0.02299	0.1148
17_15931436	rs73981413	G	A	0.17	0.15	0	UTR3	TTC19	.	P+K-	PK	0.02299	0.08024
19_55912969	rs111954966	A	C	0.03	0.15	0	exonic	UBE2S	synonymous SNV	P+K-	PK	0.02299	0.1145
20_62220585	rs6089931	G	C	0.06	0.15	0	UTR3	GMEB2	.	P+K-	PK	0.02299	0.05414
4_88082452	rs3209390	T	C	0.06	0.15	0	UTR3	KLHL8	.	P+K-	PK	0.02299	0.05414
6_32731313	rs9276585	T	A	0.06	0.15	0	upstream	HLA-DQB2	.	P+K-	PK	0.02299	0.1145
6_32610008	rs2308890	C	T	0.03	0.21	0	exonic	HLA-DQA1	synonymous SNV	P+K-	PK	0.02321	0.04199
11_26689788	rs11029665	A	T	0.75	0.95	0.67	UTR3	SLC5A12	.	P+K-	PK	0.02329	0.02414
17_4875566	rs238230	T	C	0.28	0.53	0.25	exonic	CAMTA2	synonymous SNV	P+K-	PK	0.02333	0.06104
1_12786070	rs3000930	A	G	0.61	0.81	0.53	UTR3	AADACL3	.	P+K-	PK	0.02344	0.07208
10_116192120	rs11551242	T	C	0.25	0.47	0.19	UTR3	ABLIM1	.	P+K-	PK	0.02344	0.1187
11_121038810	rs2155369	C	T	0.47	0.47	0.19	exonic	TECTA	synonymous SNV	P+K-	PK	0.02344	0.08979
11_31327316	rs2616815	C	T	0.69	0.81	0.53	exonic	DCDC1	synonymous SNV	P+K-	PK	0.02344	0.05054
19_3595794	rs4523	A	G	0.44	0.47	0.19	exonic	TBXA2R	synonymous SNV	P+K-	PK	0.02344	0.04661
21_34809693	rs1059293	C	T	0.64	0.81	0.53	UTR3	IFNGR2	.	P+K-	PK	0.02344	0.07907
21_34821570	rs1044218	G	A	0.64	0.81	0.53	UTR3	TMEM50B	.	P+K-	PK	0.02344	0.07907
21_34821691	rs1044213	G	C	0.61	0.81	0.53	UTR3	TMEM50B	.	P+K-	PK	0.02344	0.07208
21_34822150	rs2834217	T	A	0.64	0.81	0.53	UTR3	TMEM50B	.	P+K-	PK	0.02344	0.07907
3_195938177	rs1522394	A	G	0.36	0.47	0.19	exonic	ZDHHC19	synonymous SNV	P+K-	PK	0.02344	0.08497
4_419565	rs7666919	C	T	0.39	0.47	0.19	ncRNA_exonic	ABCA11P	.	P+K-	PK	0.02344	0.1368
5_109203296	rs55968726	A	G	0.24	0.47	0.19	UTR3	MAN2A1	.	P+K-	PK	0.02344	0.02528
5_147024509	rs2116765	C	T	0.33	0.47	0.19	exonic	JAKMIP2	synonymous SNV	P+K-	PK	0.02344	0.08979
6_41034858	rs11280	T	C	0.28	0.47	0.19	UTR3	OARD1	.	P+K-	PK	0.02344	0.07208
7_150934975	rs2487154	C	G	0.36	0.47	0.19	exonic	CHPF2	synonymous SNV	P+K-	PK	0.02344	0.08497
8_17819572	rs3780103	C	T	0.44	0.47	0.19	exonic	PCM1	synonymous SNV	P+K-	PK	0.02344	0.05611
12_99640557	rs1552759	T	C	0.83	0.94	0.71	exonic	ANKS1B	synonymous SNV	P+K-	PK	0.02347	0.02601
16_31142271	rs17855606	A	G	0	0.21	0	exonic	KAT8	nonsynonymous SNV	P+K-	PK	0.0235	0.07
1_23884661	rs1050096	G	A	0.82	0.94	0.72	UTR3	ID3	.	P+K-	PK	0.02383	0.04203
1_248040104	rs4925753	C	T	0.06	0.28	0.06	UTR3	TRIM58	.	P+K-	PK	0.02383	0.1065
10_104434630	rs12573077	C	A	0.14	0.28	0.06	UTR3	ARL3	.	P+K-	PK	0.02383	0.1113
11_108009660	rs35188041	C	A	0.14	0.28	0.06	exonic	ACAT1	synonymous SNV	P+K-	PK	0.02383	0.1113
12_110338526	rs61247504	G	C	0.22	0.28	0.06	UTR5	TCHP	.	P+K-	PK	0.02383	0.1113
12_110352361	rs16940680	G	A	0.22	0.28	0.06	exonic	TCHP	nonsynonymous SNV	P+K-	PK	0.02383	0.1113
14_23744932	rs1055061	C	T	0.17	0.28	0.06	exonic	HOMEZ	nonsynonymous SNV	P+K-	PK	0.02383	0.1113
16_89238190	rs12927793	G	A	0.22	0.28	0.06	UTR5	CDH15	.	P+K-	PK	0.02383	0.0632
17_39164857	rs142754182	G	A	0.08	0.28	0.06	UTR3	KRTAP3-1	.	P+K-	PK	0.02383	0.1514
17_39164881	rs10491133	T	G	0.08	0.28	0.06	UTR3	KRTAP3-1	.	P+K-	PK	0.02383	0.1514
17_39164919	rs111531901	C	T	0.08	0.28	0.06	UTR3	KRTAP3-1	.	P+K-	PK	0.02383	0.1514
17_39165174	rs112432710	G	A	0.08	0.28	0.06	exonic	KRTAP3-1	synonymous SNV	P+K-	PK	0.02383	0.1514
17_80020812	rs11542332	C	T	0.06	0.28	0.06	exonic	DUS1L	synonymous SNV	P+K-	PK	0.02383	0.0847
17_8132763	rs3826543	T	C	0.81	0.94	0.72	exonic	CTC1	nonsynonymous SNV	P+K-	PK	0.02383	0.0457
19_53612055	rs10410030	T	C	0	0.28	0.06	exonic	ZNF415	nonsynonymous SNV	P+K-	PK	0.02383	0.05527
19_8154990	rs35002391	C	T	0.11	0.28	0.06	exonic	FBN3	synonymous SNV	P+K-	PK	0.02383	0.0847
2_233324032	rs114650033	T	G	0.08	0.28	0.06	UTR3	ALPI	.	P+K-	PK	0.02383	0.0847
2_74300717	rs7560668	T	C	0.14	0.28	0.06	exonic	TET3	synonymous SNV	P+K-	PK	0.02383	0.0632
22_36629466	rs2010499	T	A	0.25	0.28	0.06	UTR5	APOL2	.	P+K-	PK	0.02383	0.0632
22_40726183	rs139919	T	C	0.17	0.28	0.06	UTR3	TNRC6B	.	P+K-	PK	0.02383	0.0632
3_48727112	rs4858798	G	A	0.92	0.94	0.72	exonic	IP6K2	synonymous SNV	P+K-	PK	0.02383	0.0847
3_49044767	rs6781790	C	T	0.89	0.94	0.72	upstream;downstream	WDR6;P4HTM	.	P+K-	PK	0.02383	0.0847
3_49213637	rs9586	C	T	0.94	0.94	0.72	UTR3	KLHDC8B	.	P+K-	PK	0.02383	0.1065
3_49236439	rs6808036	T	G	0.89	0.94	0.72	UTR5	CCDC36	.	P+K-	PK	0.02383	0.1113
3_49396751	rs3448	T	C	0.89	0.94	0.72	UTR3	RHOA	.	P+K-	PK	0.02383	0.1113
4_106552733	rs2121558	A	T	0.11	0.28	0.06	UTR3	ARHGEF38	.	P+K-	PK	0.02383	0.1514
4_5822738	rs1057052	C	A	0.17	0.28	0.06	UTR3	CRMP1	.	P+K-	PK	0.02383	0.0352
5_76360212	rs3183475	C	T	0.19	0.28	0.06	UTR3	AGGF1	.	P+K-	PK	0.02383	0.0847
6_132068237	rs11754555	T	C	0.42	0.28	0.06	UTR3	ENPP3	.	P+K-	PK	0.02383	0.1073
6_160638003	rs3127593	A	T	0.08	0.28	0.06	UTR3	SLC22A2	.	P+K-	PK	0.02383	0.1065
6_160638076	rs3103353	C	T	0.06	0.28	0.06	UTR3	SLC22A2	.	P+K-	PK	0.02383	0.0847
7_123514896	rs6949082	G	T	0.14	0.28	0.06	exonic	HYAL4	nonsynonymous SNV	P+K-	PK	0.02383	0.0847
7_129855837	rs4728190	C	T	0.17	0.28	0.06	exonic	SSMEM1	nonsynonymous SNV	P+K-	PK	0.02383	0.0847
7_129856473	rs7808330	G	A	0.17	0.28	0.06	UTR3	SSMEM1	.	P+K-	PK	0.02383	0.0847
7_138417791	rs3807153	A	G	0.19	0.28	0.06	exonic	ATP6V0A4	nonsynonymous SNV	P+K-	PK	0.02383	0.1113
8_123986123	rs74563551	C	T	0.22	0.28	0.06	UTR3	ZHX2	.	P+K-	PK	0.02383	0.1113
8_135521970	rs11778717	G	A	0.17	0.28	0.06	exonic	ZFAT	synonymous SNV	P+K-	PK	0.02383	0.0632
19_36050969	rs2733743	A	G	0.76	0.88	0.62	exonic	ATP4A	nonsynonymous SNV	P+K-	PK	0.02406	0.0378
5_155753983	rs7725121	A	T	0.06	0.23	0.03	UTR5	SGCD	.	P+K-	PK	0.02411	0.1061
2_70524142	rs14234	A	G	0.39	0.5	0.22	UTR3	FAM136A	.	P+K-	PK	0.02415	0.05371
8_11995122	rs371850474	T	C	0.03	0.19	0	exonic	USP17L2	nonsynonymous SNV	P+K-	PK	0.02417	0.04416
11_22214903	rs12792259	G	C	0.89	0.94	0.72	UTR5	ANO5	.	P+K-	PK	0.02423	0.032
22_47569605	rs15411	G	C	0.13	0.31	0.04	UTR3	TBC1D22A	.	P+K-	PK	0.02437	0.03661
19_54742738	rs448461	G	C	0.14	0.19	0	UTR3	LILRA6	.	P+K-	PK	0.0244	0.02512
9_140449582	rs10110	A	C	0.06	0.19	0	UTR3	DPH7	.	P+K-	PK	0.0244	0.06275
11_8014479	rs4758267	C	T	0.64	0.79	0.53	exonic	EIF3F	synonymous SNV	P+K-	PK	0.02445	0.03903
2_56411817	rs35587531	C	T	0.75	0.79	0.53	exonic	CCDC85A	nonsynonymous SNV	P+K-	PK	0.02445	0.04661
10_134018834	rs2279523	C	T	0	0.25	0	UTR3	DPYSL4	.	P+K-	PK	0.02456	0.04614
10_134018521	rs115200472	C	T	0.06	0.18	0	UTR3	DPYSL4	.	P+K-	PK	0.02457	0.1071
17_1616017	rs59282480	C	T	0.08	0.18	0	ncRNA_exonic	MIR22HG	.	P+K-	PK	0.02457	0.1065
1_12779560	rs3010876	T	C	0.86	0.89	0.64	exonic	AADACL3	unknown	P+K-	PK	0.02463	0.0632
1_12779618	rs3010877	T	C	0.86	0.89	0.64	exonic	AADACL3	unknown	P+K-	PK	0.02463	0.0632
13_19687818	rs12875969	C	T	0.11	0.36	0.11	ncRNA_exonic	LOC107984132	.	P+K-	PK	0.02463	0.1348
15_34524995	rs4779660	G	T	0.81	0.89	0.64	UTR3	SLC12A6	.	P+K-	PK	0.02463	0.055
15_37101788	rs1015943	T	C	0.92	0.89	0.64	ncRNA_UTR3	C15orf41	.	P+K-	PK	0.02463	0.07949
17_18022039	rs854818	A	C	0.81	0.89	0.64	UTR5	MYO15A	.	P+K-	PK	0.02463	0.0451
17_18023897	rs2955365	G	A	0.81	0.89	0.64	exonic	MYO15A	nonsynonymous SNV	P+K-	PK	0.02463	0.0451
19_49867913	rs919364	G	A	0.25	0.36	0.11	exonic	DKKL1	nonsynonymous SNV	P+K-	PK	0.02463	0.0451
19_49920805	rs17206868	A	G	0.19	0.36	0.11	UTR3	CCDC155	.	P+K-	PK	0.02463	0.0451
19_55693081	rs8112238	G	C	0.25	0.36	0.11	UTR3	PTPRH	.	P+K-	PK	0.02463	0.0632
3_45430151	rs28413188	G	A	0.25	0.36	0.11	UTR5	LARS2	.	P+K-	PK	0.02463	0.0451
4_170037572	rs3811813	G	A	0.19	0.36	0.11	exonic	SH3RF1	nonsynonymous SNV	P+K-	PK	0.02463	0.055
5_137667345	rs1042124	A	C	0.14	0.36	0.11	UTR5	CDC25C	.	P+K-	PK	0.02463	0.09423
6_131995313	rs9493048	A	G	0.14	0.36	0.11	exonic	ENPP3	synonymous SNV	P+K-	PK	0.02463	0.09423
9_140657628	rs58016314	C	T	0.5	0.36	0.11	UTR3	EHMT1	.	P+K-	PK	0.02463	0.05371
9_27547313	rs3739526	G	T	0.36	0.36	0.11	UTR3	C9orf72	.	P+K-	PK	0.02463	0.09423
18_57103126	rs72958116	G	A	0	0.25	0	UTR3	CCBE1	.	P+K-	PK	0.02466	0.04145
8_11182148	rs6995404	G	C	0.4	0.4	0.09	UTR3	MTMR9	.	P+K-	PK	0.02467	0.02675
10_49218553	rs77581903	T	C	0	0.18	0	ncRNA_exonic	AGAP12P	.	P+K-	PK	0.02478	0.02563
10_49218561	rs77177732	G	C	0	0.18	0	ncRNA_exonic	AGAP12P	.	P+K-	PK	0.02478	0.02563
1_207297680	rs1126618	T	C	0.89	0.97	0.78	exonic	C4BPA	synonymous SNV	P+K-	PK	0.02492	0.05389
6_138745092	rs45551934	G	A	0.11	0.22	0.03	UTR3	NHSL1	.	P+K-	PK	0.02492	0.02797
1_165648710	rs1143660	G	A	0.06	0.17	0	exonic	ALDH9A1	nonsynonymous SNV	P+K-	PK	0.02493	0.1065
1_3679775	rs10910024	C	T	0.14	0.17	0	exonic	CCDC27	nonsynonymous SNV	P+K-	PK	0.02493	0.1514
1_67390416	rs3008858	G	C	0.81	1	0.83	exonic	WDR78	nonsynonymous SNV	P+K-	PK	0.02493	0.1065
1_67390468	rs1886686	C	G	0.81	1	0.83	exonic	WDR78	nonsynonymous SNV	P+K-	PK	0.02493	0.1065
10_25312895	rs34929144	C	A	0.14	0.17	0	exonic	THNSL1	nonsynonymous SNV	P+K-	PK	0.02493	0.1514
11_121179549	rs7942396	C	T	0.24	0.17	0	UTR3	SC5D	.	P+K-	PK	0.02493	0.05571
11_94801406	rs74450731	T	A	0.03	0.17	0	UTR3	SRSF8	.	P+K-	PK	0.02493	0.1145
12_110368804	rs77766064	C	A	0.11	0.17	0	UTR3	GIT2	.	P+K-	PK	0.02493	0.1145
12_123798209	rs61760910	T	C	0.11	0.17	0	exonic	SBNO1	nonsynonymous SNV	P+K-	PK	0.02493	0.1065
12_50034668	rs8626	A	G	0.08	0.17	0	UTR3	FMNL3	.	P+K-	PK	0.02493	0.1065
13_23903598	rs200375761	G	A	0.03	0.17	0	UTR3	SACS	.	P+K-	PK	0.02493	0.1145
14_94423727	rs3814823	G	A	0.22	0.17	0	intronic	ASB2	.	P+K-	PK	0.02493	0.0847
15_34671909	rs112867980	A	G	0.03	0.17	0	UTR3	GOLGA8A	.	P+K-	PK	0.02493	0.1145
15_34671913	rs112422405	C	G	0.03	0.17	0	UTR3	GOLGA8A	.	P+K-	PK	0.02493	0.1145
15_34818132	rs34404542	C	G	0.03	0.17	0	UTR3	GOLGA8B	.	P+K-	PK	0.02493	0.1145
15_44198049	rs2306674	A	G	0.06	0.17	0	exonic	FRMD5	synonymous SNV	P+K-	PK	0.02493	0.1065
15_72040774	rs1872056	C	T	0.19	0.17	0	exonic	THSD4	synonymous SNV	P+K-	PK	0.02493	0.1514
16_20435261	rs200180792	C	T	0.03	0.17	0	exonic	ACSM5	nonsynonymous SNV	P+K-	PK	0.02493	0.1145
17_15930882	rs3744328	T	C	0.17	0.17	0	UTR3	TTC19	.	P+K-	PK	0.02493	0.1065
17_15931545	rs11554356	T	A	0.17	0.17	0	UTR3	TTC19	.	P+K-	PK	0.02493	0.1065
17_15931807	rs73981414	G	A	0.17	0.17	0	UTR3	TTC19	.	P+K-	PK	0.02493	0.1065
17_17206716	rs111471616	C	G	0.09	0.17	0	UTR5	NT5M	.	P+K-	PK	0.02493	0.02511
18_2917152	rs1164	T	C	0.08	0.17	0	UTR3	LPIN2	.	P+K-	PK	0.02493	0.1145
18_77915383	rs1132560	C	T	0.17	0.17	0	ncRNA_UTR3	PARD6G	.	P+K-	PK	0.02493	0.05527
18_77917479	rs62101564	G	A	0.14	0.17	0	ncRNA_UTR3	PARD6G	.	P+K-	PK	0.02493	0.05527
19_19822126	rs73006749	G	C	0.03	0.17	0	UTR3	ZNF14	.	P+K-	PK	0.02493	0.1145
19_38893856	rs3745957	G	C	0.14	0.17	0	exonic	FAM98C	synonymous SNV	P+K-	PK	0.02493	0.1514
19_40901011	rs3745202	G	C	0.25	0.17	0	exonic	PRX	nonsynonymous SNV	P+K-	PK	0.02493	0.0457
19_40904602	rs744389	G	A	0.28	0.17	0	exonic	PRX	synonymous SNV	P+K-	PK	0.02493	0.0457
19_56953272	rs3760850	G	A	0.19	0.17	0	exonic	ZNF667	synonymous SNV	P+K-	PK	0.02493	0.1065
19_9251220	rs17002013	C	T	0.14	0.17	0	UTR5	ZNF317	.	P+K-	PK	0.02493	0.1514
19_9251258	rs62103612	T	C	0.14	0.17	0	UTR5	ZNF317	.	P+K-	PK	0.02493	0.1514
2_33953212	rs80084020	G	A	0.14	0.17	0	ncRNA_exonic	MYADML	.	P+K-	PK	0.02493	0.1514
20_18168606	rs375293622	G	A	0.03	0.17	0	UTR3	KAT14	.	P+K-	PK	0.02493	0.1145
20_62321189	rs61753459	C	T	0.08	0.17	0	exonic	RTEL1	synonymous SNV	P+K-	PK	0.02493	0.1145
22_28318032	rs5752658	A	G	0.14	0.17	0	ncRNA_exonic	TTC28-AS1	.	P+K-	PK	0.02493	0.1065
22_35481493	rs61735502	C	T	0.06	0.17	0	exonic	ISX	nonsynonymous SNV	P+K-	PK	0.02493	0.1065
22_35482744	rs8142871	G	A	0.06	0.17	0	UTR3	ISX	.	P+K-	PK	0.02493	0.05527
3_131104672	rs3749390	C	A	0.08	0.17	0	UTR3	NUDT16	.	P+K-	PK	0.02493	0.1514
5_137842787	rs11741702	A	C	0.89	1	0.83	UTR3	ETF1	.	P+K-	PK	0.02493	0.1065
6_169653881	rs79227596	G	A	0.11	0.17	0	UTR5	THBS2	.	P+K-	PK	0.02493	0.05527
6_30692583	rs1061424	A	G	0.19	0.17	0	UTR3	TUBB	.	P+K-	PK	0.02493	0.05389
6_30955010	rs41288689	C	T	0.06	0.17	0	exonic	MUC21	nonsynonymous SNV	P+K-	PK	0.02493	0.1987
6_7229619	rs12192672	G	A	0.11	0.17	0	exonic	RREB1	synonymous SNV	P+K-	PK	0.02493	0.1065
7_149523584	rs62492839	C	T	0.14	0.17	0	ncRNA_exonic	SSPO	.	P+K-	PK	0.02493	0.1065
7_48563913	rs61705907	A	G	0.06	0.17	0	exonic	ABCA13	synonymous SNV	P+K-	PK	0.02493	0.1065
7_75166426	rs55859405	C	T	0	0.17	0	UTR3	HIP1	.	P+K-	PK	0.02493	0.05389
7_80306609	rs550195501	G	C	0.06	0.17	0	UTR3	CD36	.	P+K-	PK	0.02493	0.1065
8_76476869	rs13251904	T	C	0.08	0.17	0	UTR3	HNF4G	.	P+K-	PK	0.02493	0.1065
9_112082510	rs117569740	C	T	0	0.17	0	exonic	EPB41L4B	nonsynonymous SNV	P+K-	PK	0.02493	0.1145
9_139335940	rs3812590	T	C	0.22	0.17	0	UTR3	SEC16A	.	P+K-	PK	0.02493	0.0847
9_37532029	rs16934263	G	A	0.03	0.17	0	exonic	FBXO10	synonymous SNV	P+K-	PK	0.02493	0.1145
9_8485834	rs35929428	G	A	0.11	0.17	0	exonic	PTPRD	nonsynonymous SNV	P+K-	PK	0.02493	0.05527
9_96407920	rs7038310	C	T	0	0.17	0	exonic	PHF2	synonymous SNV	P+K-	PK	0.02493	0.1015
9_96440545	rs3813386	G	A	0	0.17	0	UTR3	PHF2	.	P+K-	PK	0.02493	0.1145
17_5403468	rs28692633	C	T	0.03	0.17	0	UTR3	LOC728392	.	P+K-	PK	0.02511	0.05414
17_64804729	rs56095570	G	A	0.11	0.17	0	UTR3	PRKCA	.	P+K-	PK	0.02511	0.02564
3_111695315	rs3749305	A	G	0.04	0.17	0	UTR3	PHLDB2	.	P+K-	PK	0.02511	0.05813
13_19431946	rs2801711	G	A	0.04	0.21	0	ncRNA_intronic	ANKRD20A9P	.	P+K-	PK	0.02512	0.043
1_201299900	rs3795629	G	A	0.65	0.63	0.33	UTR3	PKP1	.	P+K-	PK	0.0252	0.0257
14_96749846	rs3742475	T	C	0.89	0.88	0.64	UTR3	ATG2B	.	P+K-	PK	0.02528	0.0352
22_30685560	rs1860217	G	C	0.25	0.36	0.12	UTR5	CASTOR1	.	P+K-	PK	0.02528	0.03174
6_16327615	rs179990	A	G	0.89	0.88	0.64	exonic	ATXN1	synonymous SNV	P+K-	PK	0.02528	0.07949
11_1576005	rs59483236	T	C	0.53	0.67	0.38	UTR3	DUSP8	.	P+K-	PK	0.02546	0.04202
10_134021171	rs3814606	C	G	0.1	0.19	0	UTR3	STK32C	.	P+K-	PK	0.02563	0.04614
12_6884651	rs199694393	A	C	0.14	0.21	0.03	exonic	LAG3	nonsynonymous SNV	P+K-	PK	0.02564	0.1065
19_22575777	rs200167484	T	C	0	0.21	0.03	exonic	ZNF98	nonsynonymous SNV	P+K-	PK	0.02564	0.1071
19_39226927	rs62120074	T	C	0.06	0.21	0.03	exonic	CAPN12	nonsynonymous SNV	P+K-	PK	0.02564	0.05571
20_43933196	rs2233093	C	T	0.32	0.21	0.03	exonic	MATN4	synonymous SNV	P+K-	PK	0.02564	0.04203
3_38888764	rs62244134	G	A	0.06	0.21	0.03	exonic	SCN11A	synonymous SNV	P+K-	PK	0.02564	0.05571
1_40254231	rs191559100	A	G	0.07	0.27	0.03	UTR5	BMP8B	.	P+K-	PK	0.02569	0.05105
22_19957787	rs165840	C	T	0.62	0.93	0.71	UTR3	ARVCF	.	P+K-	PK	0.02587	0.05709
13_21722557	rs3088071	A	G	0.44	0.66	0.35	UTR3	SAP18	.	P+K-	PK	0.0259	0.05146
6_146125793	rs3811102	A	T	0.56	0.65	0.34	exonic	FBXO30	nonsynonymous SNV	P+K-	PK	0.0259	0.03408
6_87795259	rs6631	A	T	0.38	0.66	0.35	UTR3	CGA	.	P+K-	PK	0.0259	0.04896
5_161112693	rs3811995	C	T	0.31	0.56	0.28	upstream	GABRA6	.	P+K-	PK	0.02609	0.04475
5_180486841	rs10054109	C	T	0.5	0.56	0.28	exonic	BTNL9	synonymous SNV	P+K-	PK	0.02609	0.03205
1_23688933	rs2849028	A	G	0.39	0.47	0.18	exonic	ZNF436	synonymous SNV	P+K-	PK	0.02625	0.02916
1_15708540	rs1010294	A	G	0.47	0.5	0.22	exonic	FHAD1	nonsynonymous SNV	P+K-	PK	0.02631	0.08979
1_215960167	rs10864198	T	G	0.47	0.5	0.22	exonic	USH2A	nonsynonymous SNV	P+K-	PK	0.02631	0.05611
1_46746164	rs11542623	C	T	0.39	0.5	0.22	exonic	LRRC41	nonsynonymous SNV	P+K-	PK	0.02631	0.08497
12_12967127	rs1051374	C	T	0.31	0.5	0.22	exonic	DDX47	synonymous SNV	P+K-	PK	0.02631	0.05054
15_44943757	rs3759871	A	G	0.39	0.5	0.22	exonic	SPG11	nonsynonymous SNV	P+K-	PK	0.02631	0.1368
15_74908132	rs8040674	G	A	0.33	0.5	0.22	exonic	CLK3	nonsynonymous SNV	P+K-	PK	0.02631	0.04198
19_53343939	rs9749464	T	G	0.36	0.5	0.22	UTR3	ZNF468	.	P+K-	PK	0.02631	0.05611
2_113308516	rs2304555	T	A	0.69	0.78	0.5	exonic	POLR1B	synonymous SNV	P+K-	PK	0.02631	0.1187
2_7164578	rs376219	A	G	0.44	0.5	0.22	exonic	RNF144A	synonymous SNV	P+K-	PK	0.02631	0.08497
4_21847708	rs4434239	T	C	0.36	0.5	0.22	ncRNA_exonic	KCNIP4-IT1	.	P+K-	PK	0.02631	0.08979
4_21850305	rs1513572	T	C	0.36	0.5	0.22	ncRNA_exonic	KCNIP4-IT1	.	P+K-	PK	0.02631	0.08979
4_21851276	rs13122692	C	T	0.36	0.5	0.22	ncRNA_exonic	KCNIP4-IT1	.	P+K-	PK	0.02631	0.08979
5_169504743	rs1045168	T	C	0.36	0.5	0.22	exonic	DOCK2	synonymous SNV	P+K-	PK	0.02631	0.05054
5_82834630	rs309557	T	C	0.56	0.5	0.22	exonic	VCAN	synonymous SNV	P+K-	PK	0.02631	0.05771
5_82835545	rs160279	A	G	0.53	0.5	0.22	exonic	VCAN	synonymous SNV	P+K-	PK	0.02631	0.05611
6_7572262	rs2076304	A	G	0.81	0.78	0.5	exonic	DSP	synonymous SNV	P+K-	PK	0.02631	0.06404
6_90638553	rs1065272	T	G	0.44	0.5	0.22	UTR3	BACH2	.	P+K-	PK	0.02631	0.08979
6_90981657	rs45553631	C	T	0.14	0.5	0.22	UTR5	BACH2	.	P+K-	PK	0.02631	0.055
8_104412388	rs2241777	C	A	0.22	0.5	0.22	UTR3	SLC25A32	.	P+K-	PK	0.02631	0.07208
9_131285955	rs2275260	A	G	0.22	0.5	0.22	exonic	GLE1	nonsynonymous SNV	P+K-	PK	0.02631	0.06404
11_34168153	rs8187	G	A	0.28	0.53	0.25	UTR3	NAT10	.	P+K-	PK	0.02644	0.04833
13_28240828	rs14144	A	G	0.53	0.53	0.25	UTR3	POLR1D	.	P+K-	PK	0.02644	0.04643
11_75283253	rs9175	A	G	0.16	0.25	0.03	UTR3	SERPINH1	.	P+K-	PK	0.02648	0.03996
2_73492614	rs526106	A	T	0.23	0.5	0.21	exonic	FBXO41	nonsynonymous SNV	P+K-	PK	0.02651	0.03452
15_20771609	rs554118666	T	C	0.11	0.15	0	ncRNA_exonic	GOLGA8CP	.	P+K-	PK	0.0268	0.1124
13_26620978	rs74965018	G	T	0.14	0.25	0.03	exonic	SHISA2	synonymous SNV	P+K-	PK	0.02687	0.03655
18_10752666	rs7234309	C	T	0.17	0.24	0.03	exonic	PIEZO2	nonsynonymous SNV	P+K-	PK	0.02718	0.05943
17_39137387	rs2010027	C	T	0.24	0.44	0.16	exonic	KRT40	nonsynonymous SNV	P+K-	PK	0.02719	0.04425
19_15587345	rs3813135	T	C	0.18	0.36	0.1	exonic	PGLYRP2	nonsynonymous SNV	P+K-	PK	0.02749	0.0419
10_104848123	rs8139	G	A	0.31	0.5	0.24	UTR3	CNNM2,NT5C2	.	P+K-	PK	0.02755	0.08497
8_22880162	rs1047275	G	C	0.36	0.5	0.24	UTR3	TNFRSF10B	.	P+K-	PK	0.02755	0.05026
1_120384104	rs183775485	G	A	0.06	0.22	0.03	exonic	NBPF7	nonsynonymous SNV	P+K-	PK	0.02781	0.05527
1_211652185	rs11119748	C	G	0.19	0.22	0.03	UTR3	RD3	.	P+K-	PK	0.02781	0.1514
1_215797021	rs17024993	A	C	0.08	0.22	0.03	UTR3	USH2A	.	P+K-	PK	0.02781	0.1514
1_45250007	rs59895800	C	G	0.17	0.22	0.03	exonic	BEST4	nonsynonymous SNV	P+K-	PK	0.02781	0.05527
11_124310622	rs4296049	A	G	0.11	0.22	0.03	exonic	OR8B8	synonymous SNV	P+K-	PK	0.02781	0.1065
12_64537041	rs17100102	A	G	0.03	0.22	0.03	UTR3	SRGAP1	.	P+K-	PK	0.02781	0.1065
14_92922900	rs77671856	G	A	0.19	0.22	0.03	exonic	SLC24A4	synonymous SNV	P+K-	PK	0.02781	0.1113
14_94935566	rs4900231	G	A	0.25	0.22	0.03	exonic	SERPINA9	synonymous SNV	P+K-	PK	0.02781	0.0632
15_22925851	rs4134802	C	T	0.03	0.22	0.03	exonic	CYFIP1	synonymous SNV	P+K-	PK	0.02781	0.1065
15_34016274	rs6495228	G	A	0.92	0.97	0.78	exonic	RYR3	nonsynonymous SNV	P+K-	PK	0.02781	0.05389
17_80017902	rs73999366	C	T	0.06	0.22	0.03	exonic	DUS1L	nonsynonymous SNV	P+K-	PK	0.02781	0.1065
17_80352234	rs62079522	G	A	0.19	0.22	0.03	UTR3	OGFOD3	.	P+K-	PK	0.02781	0.0847
17_80352303	rs62079523	G	A	0.19	0.22	0.03	exonic	OGFOD3	nonsynonymous SNV	P+K-	PK	0.02781	0.0847
18_9959118	rs9807392	A	G	0.06	0.22	0.03	UTR3	VAPA	.	P+K-	PK	0.02781	0.1514
19_22847487	rs201930537	G	A	0	0.22	0.03	exonic	ZNF492	nonsynonymous SNV	P+K-	PK	0.02781	0.1065
19_22848400	rs7247785	A	G	0	0.22	0.03	UTR3	ZNF492	.	P+K-	PK	0.02781	0.1145
19_22939096	rs55681804	T	G	0	0.22	0.03	UTR3	ZNF99	.	P+K-	PK	0.02781	0.1145
19_22939326	rs56115674	G	A	0	0.22	0.03	UTR3	ZNF99	.	P+K-	PK	0.02781	0.1145
19_22940694	rs62119157	C	T	0	0.22	0.03	exonic	ZNF99	nonsynonymous SNV	P+K-	PK	0.02781	0.1145
19_22940827	rs142615427	T	C	0	0.22	0.03	exonic	ZNF99	synonymous SNV	P+K-	PK	0.02781	0.1145
19_22941071	rs144632185	T	C	0	0.22	0.03	exonic	ZNF99	nonsynonymous SNV	P+K-	PK	0.02781	0.1145
19_22941591	rs62119159	A	T	0	0.22	0.03	exonic	ZNF99	nonsynonymous SNV	P+K-	PK	0.02781	0.1145
19_22942335	rs61740110	G	A	0	0.22	0.03	exonic	ZNF99	nonsynonymous SNV	P+K-	PK	0.02781	0.1145
19_22952111	rs34726149	A	G	0	0.22	0.03	exonic	ZNF99	nonsynonymous SNV	P+K-	PK	0.02781	0.1145
19_39229089	rs12983010	A	G	0.11	0.22	0.03	exonic	CAPN12	nonsynonymous SNV	P+K-	PK	0.02781	0.1514
2_37227797	rs62621396	C	G	0.22	0.22	0.03	exonic	HEATR5B	nonsynonymous SNV	P+K-	PK	0.02781	0.1113
20_52193698	rs7270855	G	A	0.14	0.22	0.03	exonic	ZNF217	synonymous SNV	P+K-	PK	0.02781	0.0847
20_57829301	rs259956	T	C	0.83	0.97	0.78	exonic	ZNF831	nonsynonymous SNV	P+K-	PK	0.02781	0.1065
21_46011687	rs58757665	C	T	0.06	0.22	0.03	exonic	KRTAP10-6	nonsynonymous SNV	P+K-	PK	0.02781	0.05527
22_50217387	rs11912787	G	A	0.22	0.22	0.03	exonic	BRD1	synonymous SNV	P+K-	PK	0.02781	0.1113
3_49053219	rs7100	A	G	0.94	0.97	0.78	UTR3	WDR6	.	P+K-	PK	0.02781	0.1065
3_49054692	rs3087866	T	C	0.94	0.97	0.78	exonic	DALRD3	nonsynonymous SNV	P+K-	PK	0.02781	0.1065
4_102751076	rs10516487	G	A	0.19	0.22	0.03	exonic	BANK1	nonsynonymous SNV	P+K-	PK	0.02781	0.0847
4_83274799	rs3944	A	G	0.17	0.22	0.03	UTR3	HNRNPD	.	P+K-	PK	0.02781	0.1065
4_8605818	rs6852001	C	T	0.17	0.22	0.03	exonic	CPZ	synonymous SNV	P+K-	PK	0.02781	0.0457
5_160716585	rs1096	G	A	0.08	0.22	0.03	UTR3	GABRB2	.	P+K-	PK	0.02781	0.1065
5_160719975	rs592418	T	C	0.08	0.22	0.03	UTR3	GABRB2	.	P+K-	PK	0.02781	0.1065
5_236649	rs76896145	C	T	0.19	0.22	0.03	exonic	SDHA	nonsynonymous SNV	P+K-	PK	0.02781	0.1514
6_29910581	rs1059423	C	A	0.08	0.22	0.03	exonic	HLA-A	nonsynonymous SNV	P+K-	PK	0.02781	0.1514
6_29910583	rs1059426	C	T	0.08	0.22	0.03	exonic	HLA-A	synonymous SNV	P+K-	PK	0.02781	0.1514
6_29910586	rs12721672	G	A	0.08	0.22	0.03	exonic	HLA-A	synonymous SNV	P+K-	PK	0.02781	0.1514
6_32846250	rs112947199	A	G	0.09	0.22	0.03	intergenic	PSMB9(dist=18622),LOC100294145(dist=15703)	.	P+K-	PK	0.02781	0.08024
7_100386900	rs191137	T	C	0.94	0.97	0.78	exonic	ZAN	unknown	P+K-	PK	0.02781	0.1514
7_76871113	rs17230060	A	G	0.14	0.22	0.03	exonic	CCDC146	synonymous SNV	P+K-	PK	0.02781	0.1065
9_129459662	rs28687510	G	T	0.22	0.22	0.03	UTR3	LMX1B	.	P+K-	PK	0.02781	0.0847
9_27546828	rs9103	A	G	0.22	0.22	0.03	UTR3	C9orf72	.	P+K-	PK	0.02781	0.1113
15_63600876	rs10519204	T	C	0.31	0.43	0.17	UTR3	APH1B	.	P+K-	PK	0.02801	0.03444
12_104168908	rs4964830	C	T	0.36	0.62	0.32	UTR3	NT5DC3	.	P+K-	PK	0.02803	0.02958
13_48517289	rs4941618	A	G	0.86	0.97	0.78	UTR3	SUCLA2	.	P+K-	PK	0.02813	0.1065
16_57392733	rs4359426	A	C	0.83	0.97	0.78	exonic	CCL22	nonsynonymous SNV	P+K-	PK	0.02813	0.0847
6_149771344	rs412746	T	C	0.97	0.97	0.78	UTR3	ZC3H12D	.	P+K-	PK	0.02813	0.05571
17_54967404	rs205500	T	C	0.41	0.65	0.35	UTR3	TRIM25	.	P+K-	PK	0.02832	0.05617
12_6679743	rs2267968	G	A	0	0.21	0	UTR3	CHD4	.	P+K-	PK	0.0284	0.04614
1_19984461	rs3087566	C	T	0.62	0.86	0.62	UTR3	MICOS10-NBL1,NBL1	.	P+K-	PK	0.02847	0.03174
6_29760510	rs1611211	G	A	0.47	0.38	0.14	ncRNA_exonic	HCG4	.	P+K-	PK	0.02847	0.04346
7_100385714	rs117714489	G	A	0.09	0.38	0.14	exonic	ZAN	unknown	P+K-	PK	0.02847	0.046
7_20796585	rs966717	T	C	0.21	0.38	0.14	UTR3	ABCB5	.	P+K-	PK	0.02847	0.04432
7_21641218	rs3827657	G	A	0.67	0.86	0.62	exonic	DNAH11	synonymous SNV	P+K-	PK	0.02847	0.055
11_123886865	rs4084209	T	A	0.47	0.75	0.47	exonic	OR10G4	nonsynonymous SNV	P+K-	PK	0.02873	0.09353
12_56827694	rs2279665	C	G	0.69	0.75	0.47	exonic	TIMELESS	synonymous SNV	P+K-	PK	0.02873	0.08497
19_14030689	rs10410239	T	C	0.19	0.53	0.25	exonic	CC2D1A	synonymous SNV	P+K-	PK	0.02873	0.08497
19_17414138	rs12986312	G	T	0.53	0.53	0.25	UTR5	ABHD8	.	P+K-	PK	0.02873	0.05611
19_17431495	rs11666036	C	T	0.53	0.53	0.25	UTR3	DDA1	.	P+K-	PK	0.02873	0.05611
19_17435887	rs56286266	C	T	0.53	0.53	0.25	exonic	ANO8	synonymous SNV	P+K-	PK	0.02873	0.05611
19_53343767	rs9749312	G	A	0.39	0.53	0.25	UTR3	ZNF468	.	P+K-	PK	0.02873	0.05611
19_53344919	rs58239286	T	G	0.36	0.53	0.25	exonic	ZNF468	nonsynonymous SNV	P+K-	PK	0.02873	0.07907
2_10050947	rs1054561	T	C	0.64	0.75	0.47	exonic	TAF1B	synonymous SNV	P+K-	PK	0.02873	0.08979
2_10050960	rs1054565	A	G	0.64	0.75	0.47	exonic	TAF1B	nonsynonymous SNV	P+K-	PK	0.02873	0.08979
20_16033116	rs1238278	G	A	0.61	0.75	0.47	UTR3	MACROD2	.	P+K-	PK	0.02873	0.08979
22_50301476	rs8135963	T	C	0.53	0.53	0.25	exonic	ALG12	synonymous SNV	P+K-	PK	0.02873	0.05611
3_121306729	rs11712050	T	G	0.36	0.53	0.25	UTR3	ARGFX	.	P+K-	PK	0.02873	0.08979
4_91701720	rs2271592	C	T	0.69	0.75	0.47	UTR3	CCSER1	.	P+K-	PK	0.02873	0.05371
4_91702822	rs11730314	C	T	0.69	0.75	0.47	UTR3	CCSER1	.	P+K-	PK	0.02873	0.05371
5_137683305	rs2269952	T	C	0.33	0.53	0.25	UTR3	FAM53C	.	P+K-	PK	0.02873	0.05611
5_82877682	rs11726	A	G	0.64	0.75	0.47	UTR3	VCAN	.	P+K-	PK	0.02873	0.09619
8_1833801	rs9657362	G	C	0.31	0.53	0.25	exonic	ARHGEF10	nonsynonymous SNV	P+K-	PK	0.02873	0.05371
1_23410742	rs506004	A	C	0.56	0.59	0.31	UTR3	LUZP1	.	P+K-	PK	0.02958	0.03065
8_134470631	rs2142306	T	C	0.53	0.59	0.31	UTR3	ST3GAL1	.	P+K-	PK	0.02958	0.03521
17_79089590	rs4969391	A	G	0	0.2	0	exonic	BAIAP2	nonsynonymous SNV	P+K-	PK	0.02969	0.04145
4_99800174	rs4699688	G	C	0.29	0.53	0.26	UTR3	EIF4E	.	P+K-	PK	0.03022	0.04722
1_75199214	rs745108	G	A	0.53	0.56	0.28	intronic	TYW3	.	P+K-	PK	0.03066	0.1528
1_75214441	rs1133891	A	G	0.53	0.56	0.28	exonic	TYW3	nonsynonymous SNV	P+K-	PK	0.03066	0.1528
11_123909073	rs11219419	C	G	0.31	0.56	0.28	exonic	OR10G7	synonymous SNV	P+K-	PK	0.03066	0.05371
11_26692435	rs11029666	T	C	0.58	0.72	0.44	UTR3	SLC5A12	.	P+K-	PK	0.03066	0.1435
11_33724780	rs704697	T	C	0.5	0.72	0.44	UTR3	CD59	.	P+K-	PK	0.03066	0.05771
11_33728614	rs831618	T	G	0.5	0.72	0.44	UTR3	CD59	.	P+K-	PK	0.03066	0.05771
15_82634933	rs370896238	C	A	0.09	0.15	0	UTR3	GOLGA6L10	.	P+K-	PK	0.03066	0.1124
17_43923266	rs62054815	G	A	0.03	0.15	0	exonic	SPPL2C	nonsynonymous SNV	P+K-	PK	0.03066	0.05219
17_47209861	rs2177308	G	A	0.28	0.56	0.28	UTR5	B4GALNT2	.	P+K-	PK	0.03066	0.05054
2_239832097	rs60432037	A	T	0.58	0.72	0.44	UTR3	TWIST2	.	P+K-	PK	0.03066	0.09353
21_15599848	rs2822446	C	T	0.47	0.56	0.28	UTR3	RBM11	.	P+K-	PK	0.03066	0.05851
21_15599963	rs2822447	A	G	0.47	0.56	0.28	UTR3	RBM11	.	P+K-	PK	0.03066	0.05851
3_194061578	rs11713634	G	A	0.47	0.56	0.28	UTR3	CPN2	.	P+K-	PK	0.03066	0.1528
5_31317529	rs2302903	A	G	0.44	0.56	0.28	exonic	CDH6	synonymous SNV	P+K-	PK	0.03066	0.09353
6_90315789	rs3748085	A	G	0.53	0.56	0.28	exonic	ANKRD6	nonsynonymous SNV	P+K-	PK	0.03066	0.09779
7_33054112	rs12536321	A	G	0.72	0.72	0.44	UTR3	NT5C3A	.	P+K-	PK	0.03066	0.06404
7_6370575	rs3750041	C	T	0.31	0.56	0.28	exonic	FAM220A	nonsynonymous SNV	P+K-	PK	0.03066	0.07208
9_107360826	rs1851725	A	G	0.5	0.56	0.28	exonic	OR13C5	nonsynonymous SNV	P+K-	PK	0.03066	0.09619
9_107360851	rs1523678	T	C	0.5	0.56	0.28	exonic	OR13C5	nonsynonymous SNV	P+K-	PK	0.03066	0.09619
9_33113322	rs7019909	C	T	0.17	0.56	0.28	UTR3	B4GALT1	.	P+K-	PK	0.03066	0.04661
1_89522646	rs1048425	G	C	0.86	0.86	0.61	exonic	GBP1	nonsynonymous SNV	P+K-	PK	0.03086	0.09423
11_46890165	rs3816614	C	T	0.75	0.86	0.61	exonic	LRP4	nonsynonymous SNV	P+K-	PK	0.03086	0.03457
11_47799775	rs9909	C	G	0.19	0.39	0.14	UTR3	NUP160	.	P+K-	PK	0.03086	0.09423
14_96748288	rs7150025	T	G	0.78	0.86	0.61	UTR3	ATG2B	.	P+K-	PK	0.03086	0.06404
14_96748610	rs7150634	T	C	0.78	0.86	0.61	UTR3	ATG2B	.	P+K-	PK	0.03086	0.055
16_30346692	rs146098127	A	G	0.26	0.39	0.14	ncRNA_exonic	SMG1P5	.	P+K-	PK	0.03086	0.04339
16_65022114	rs28216	C	T	0.33	0.39	0.14	exonic	CDH11	synonymous SNV	P+K-	PK	0.03086	0.07208
16_71487206	rs2070832	T	C	0.69	0.86	0.61	exonic	ZNF23	nonsynonymous SNV	P+K-	PK	0.03086	0.09423
16_89294381	rs28415940	T	C	0.69	0.86	0.61	exonic	ZNF778	nonsynonymous SNV	P+K-	PK	0.03086	0.07208
17_40465910	rs1053005	T	C	0.25	0.39	0.14	UTR3	STAT3	.	P+K-	PK	0.03086	0.06404
17_42239561	rs13726	C	T	0.31	0.39	0.14	UTR3	C17orf53	.	P+K-	PK	0.03086	0.09423
17_42269017	rs7089	T	C	0.28	0.39	0.14	UTR3	TMUB2	.	P+K-	PK	0.03086	0.09423
18_61655200	rs9961532	G	A	0.11	0.39	0.14	UTR3	SERPINB8	.	P+K-	PK	0.03086	0.09423
19_59059729	rs2305120	G	A	0.14	0.39	0.14	exonic	TRIM28	synonymous SNV	P+K-	PK	0.03086	0.1073
2_113346512	rs1047652	A	C	0.82	0.86	0.61	UTR3	CHCHD5	.	P+K-	PK	0.03086	0.03457
2_1546361	rs28915689	G	T	0.17	0.39	0.14	UTR3	TPO	.	P+K-	PK	0.03086	0.09423
2_233324209	rs2573215	T	G	0.19	0.39	0.14	UTR3	ALPI	.	P+K-	PK	0.03086	0.055
21_19164911	rs2220511	C	T	0.25	0.39	0.14	UTR3	C21orf91	.	P+K-	PK	0.03086	0.04198
22_19959473	rs165815	C	T	0.5	0.86	0.61	exonic	ARVCF	nonsynonymous SNV	P+K-	PK	0.03086	0.1187
3_114028391	rs13076738	C	A	0.47	0.39	0.14	UTR3	TIGIT	.	P+K-	PK	0.03086	0.06404
3_114028867	rs13082155	G	A	0.47	0.39	0.14	UTR3	TIGIT	.	P+K-	PK	0.03086	0.06404
3_136573440	rs9827648	A	G	0.69	0.86	0.61	exonic	SLC35G2	synonymous SNV	P+K-	PK	0.03086	0.04198
3_136574501	rs1052618	A	G	0.72	0.86	0.61	exonic	SLC35G2	nonsynonymous SNV	P+K-	PK	0.03086	0.0451
4_7777234	rs10032821	C	T	0.19	0.39	0.14	ncRNA_exonic	AFAP1-AS1	.	P+K-	PK	0.03086	0.04661
7_21640361	rs10269582	T	C	0.31	0.39	0.14	exonic	DNAH11	nonsynonymous SNV	P+K-	PK	0.03086	0.07208
8_73978479	rs7841807	A	C	0.14	0.39	0.14	UTR3	SBSPON	.	P+K-	PK	0.03086	0.055
8_73978819	rs2291220	T	C	0.14	0.39	0.14	UTR3	SBSPON	.	P+K-	PK	0.03086	0.055
8_77523920	rs10957811	A	T	0.47	0.39	0.14	ncRNA_exonic	ZFHX4-AS1	.	P+K-	PK	0.03086	0.04198
9_140638461	rs1129768	T	C	0.53	0.39	0.14	exonic	EHMT1	synonymous SNV	P+K-	PK	0.03086	0.07208
3_112991312	rs3814398	C	T	0.18	0.36	0.11	exonic	BOC	synonymous SNV	P+K-	PK	0.0311	0.05961
9_45728020	.	A	T	0.85	0.85	0.61	intergenic	LOC107984035(dist=162896),FAM27E2(dist=388923)	.	P+K-	PK	0.03174	0.08949
17_1840079	rs143202933	C	T	0	0.18	0	exonic	RTN4RL1	nonsynonymous SNV	P+K-	PK	0.03176	0.04483
10_117705146	rs3740571	T	C	0.14	0.29	0.08	UTR3	ATRNL1	.	P+K-	PK	0.032	0.1124
16_81157385	rs8050204	G	T	0.33	0.29	0.08	exonic	PKD1L2	unknown	P+K-	PK	0.032	0.07949
16_81161608	rs16954722	T	C	0.31	0.29	0.08	exonic	PKD1L2	unknown	P+K-	PK	0.032	0.08949
3_46783637	rs59721087	T	C	0.25	0.29	0.08	ncRNA_exonic	PRSS45P	.	P+K-	PK	0.032	0.08065
1_225533684	rs6667999	A	G	0.53	0.69	0.42	exonic	DNAH14	nonsynonymous SNV	P+K-	PK	0.03205	0.09353
1_225534219	rs7527925	T	C	0.53	0.69	0.42	exonic	DNAH14	nonsynonymous SNV	P+K-	PK	0.03205	0.09353
10_116194780	rs4751906	C	G	0.39	0.58	0.31	UTR3	ABLIM1	.	P+K-	PK	0.03205	0.09619
10_81813264	rs10788430	C	T	0.72	0.69	0.42	ncRNA_exonic	TMEM254-AS1	.	P+K-	PK	0.03205	0.07907
11_26656563	rs7946841	C	T	0.56	0.69	0.42	exonic	ANO3	synonymous SNV	P+K-	PK	0.03205	0.1488
11_26684617	rs3550	G	T	0.56	0.69	0.42	UTR3	ANO3	.	P+K-	PK	0.03205	0.1528
11_26692265	rs10835055	G	A	0.56	0.69	0.42	UTR3	SLC5A12	.	P+K-	PK	0.03205	0.1528
11_43921054	rs3824948	T	C	0.47	0.58	0.31	ncRNA_exonic	SEC14L1P1	.	P+K-	PK	0.03205	0.05771
12_5021228	rs1048500	T	C	0.64	0.58	0.31	exonic	KCNA1	synonymous SNV	P+K-	PK	0.03205	0.05771
12_64519806	rs789722	T	C	0.67	0.69	0.42	exonic	SRGAP1	synonymous SNV	P+K-	PK	0.03205	0.05771
15_90126121	rs10775247	C	T	0.44	0.58	0.31	exonic	TICRR	nonsynonymous SNV	P+K-	PK	0.03205	0.08979
15_90174824	rs12900805	C	T	0.47	0.58	0.31	exonic	KIF7	nonsynonymous SNV	P+K-	PK	0.03205	0.09353
15_90176073	rs3803530	C	A	0.47	0.58	0.31	exonic	KIF7	nonsynonymous SNV	P+K-	PK	0.03205	0.09353
18_56196451	rs7236563	C	T	0.42	0.58	0.31	exonic	ALPK2	synonymous SNV	P+K-	PK	0.03205	0.09353
18_56204932	rs3809973	T	G	0.42	0.58	0.31	exonic	ALPK2	nonsynonymous SNV	P+K-	PK	0.03205	0.08497
2_70188676	rs3796097	T	C	0.5	0.58	0.31	exonic	ASPRV1	nonsynonymous SNV	P+K-	PK	0.03205	0.05851
2_75060099	rs656489	A	G	0.58	0.69	0.42	UTR5	HK2	.	P+K-	PK	0.03205	0.05054
20_3204084	rs9101	G	A	0.64	0.69	0.42	exonic	ITPA	nonsynonymous SNV	P+K-	PK	0.03205	0.08497
20_62688877	rs816955	C	G	0.5	0.58	0.31	UTR5	TCEA2	.	P+K-	PK	0.03205	0.09779
3_118753542	rs73185835	G	T	0.39	0.58	0.31	UTR5	IGSF11	.	P+K-	PK	0.03205	0.05771
5_180487085	rs10434808	G	A	0.58	0.58	0.31	UTR3	BTNL9	.	P+K-	PK	0.03205	0.05851
5_180487137	rs10434809	C	T	0.58	0.58	0.31	UTR3	BTNL9	.	P+K-	PK	0.03205	0.09619
5_180487144	rs10434810	C	A	0.58	0.58	0.31	UTR3	BTNL9	.	P+K-	PK	0.03205	0.09619
6_166736362	rs7088	C	T	0.67	0.69	0.42	exonic	SFT2D1	synonymous SNV	P+K-	PK	0.03205	0.09353
7_2740015	rs798473	T	G	0.64	0.69	0.42	UTR5	AMZ1	.	P+K-	PK	0.03205	0.05611
7_30492237	rs2075820	C	T	0.47	0.58	0.31	exonic	NOD1	nonsynonymous SNV	P+K-	PK	0.03205	0.05371
1_16909129	rs199798572	T	C	0.55	0.5	0.18	exonic	NBPF1	unknown	P+K-	PK	0.03235	0.05035
1_153410822	rs10888561	C	A	0.61	0.61	0.33	intergenic	S100A7A(dist=15124),S100A7(dist=19398)	.	P+K-	PK	0.0329	0.05851
1_200521412	rs12060793	G	A	0.58	0.67	0.39	UTR3	KIF14	.	P+K-	PK	0.0329	0.09353
12_104166243	rs9132	C	T	0.42	0.61	0.33	UTR3	NT5DC3	.	P+K-	PK	0.0329	0.09353
12_104167185	rs751448	C	T	0.42	0.61	0.33	UTR3	NT5DC3	.	P+K-	PK	0.0329	0.09353
12_104169356	rs10861096	C	T	0.42	0.61	0.33	UTR3	NT5DC3	.	P+K-	PK	0.0329	0.09353
12_21590557	rs2058463	A	C	0.58	0.61	0.33	upstream	PYROXD1	.	P+K-	PK	0.0329	0.05851
12_21590621	rs2058464	T	C	0.53	0.61	0.33	UTR5	PYROXD1	.	P+K-	PK	0.0329	0.05771
12_5023713	rs7974459	T	C	0.67	0.61	0.33	UTR3	KCNA1	.	P+K-	PK	0.0329	0.05771
12_56843893	rs2371455	G	T	0.61	0.67	0.39	UTR3	MIP	.	P+K-	PK	0.0329	0.08497
13_44603253	rs3168693	T	C	0.56	0.61	0.33	ncRNA_exonic	NRAD1	.	P+K-	PK	0.0329	0.05771
15_34522679	rs4530104	C	T	0.53	0.61	0.33	UTR3	SLC12A6	.	P+K-	PK	0.0329	0.05771
15_34525035	rs4780233	T	C	0.53	0.61	0.33	UTR3	SLC12A6	.	P+K-	PK	0.0329	0.05771
15_34528948	rs4577050	G	A	0.53	0.61	0.33	exonic	SLC12A6	synonymous SNV	P+K-	PK	0.0329	0.05771
19_53884412	rs4438413	G	A	0.47	0.67	0.39	exonic	ZNF525	nonsynonymous SNV	P+K-	PK	0.0329	0.09779
3_28566476	rs3816573	C	T	0.56	0.61	0.33	UTR3	ZCWPW2	.	P+K-	PK	0.0329	0.05886
7_33644948	rs1050721	C	T	0.58	0.61	0.33	UTR3	BBS9	.	P+K-	PK	0.0329	0.09779
3_75786833	rs139448820	G	A	0.6	0.69	0.39	exonic	ZNF717	synonymous SNV	P+K-	PK	0.03317	0.03682
10_12876850	rs2482073	A	G	0.35	0.64	0.36	UTR3	CAMK1D	.	P+K-	PK	0.03318	0.03521
11_46342834	rs7476	A	C	0.47	0.64	0.36	UTR3	CREB3L1	.	P+K-	PK	0.03318	0.05851
12_52281920	rs697633	G	A	0.53	0.64	0.36	UTR5	ANKRD33	.	P+K-	PK	0.03318	0.05851
19_21606429	rs4621113	G	T	0.58	0.64	0.36	exonic	ZNF493	nonsynonymous SNV	P+K-	PK	0.03318	0.09779
19_56953585	rs3760849	T	C	0.72	0.64	0.36	exonic	ZNF667	nonsynonymous SNV	P+K-	PK	0.03318	0.05611
5_1052360	rs3810854	C	T	0.58	0.64	0.36	UTR3	SLC12A7	.	P+K-	PK	0.03318	0.09619
5_181730	rs12519352	C	G	0.44	0.64	0.36	exonic	PLEKHG4B	nonsynonymous SNV	P+K-	PK	0.03318	0.09353
7_35734529	rs78381277	C	G	0.67	0.64	0.36	UTR5	HERPUD2	.	P+K-	PK	0.03318	0.09353
11_117335722	rs538847	T	C	0.61	0.83	0.59	exonic	DSCAML1	synonymous SNV	P+K-	PK	0.03382	0.03916
7_37951726	rs1132553	G	A	0.22	0.41	0.17	exonic	SFRP4	synonymous SNV	P+K-	PK	0.03382	0.06488
6_29759823	rs1611205	T	C	0.44	0.41	0.17	ncRNA_exonic	HCG4,HLA-V	.	P+K-	PK	0.034	0.04722
6_29759824	rs1611206	T	C	0.44	0.41	0.17	ncRNA_exonic	HCG4,HLA-V	.	P+K-	PK	0.034	0.04722
8_56363564	rs2939632	C	T	0.08	0.41	0.17	ncRNA_exonic	SBF1P1	.	P+K-	PK	0.034	0.04203
2_88411904	rs2970889	C	T	0.44	0.68	0.42	UTR3	SMYD1	.	P+K-	PK	0.03408	0.05487
5_188747	rs6874933	C	T	0.41	0.58	0.32	UTR3	PLEKHG4B	.	P+K-	PK	0.03408	0.05617
19_48442800	rs62130020	G	A	0.31	0.39	0.13	ncRNA_exonic	SNAR-C4	.	P+K-	PK	0.03436	0.0419
1_120164966	rs7552885	C	T	0.53	0.82	0.56	UTR3	ZNF697	.	P+K-	PK	0.03444	0.04509
3_28533658	rs13100556	G	A	0.53	0.44	0.18	exonic	ZCWPW2	nonsynonymous SNV	P+K-	PK	0.03444	0.04726
1_160516262	rs11585738	A	G	0.19	0.31	0.08	UTR3	CD84	.	P+K-	PK	0.03457	0.1348
1_160516659	rs3733266	C	G	0.19	0.31	0.08	UTR3	CD84	.	P+K-	PK	0.03457	0.1348
1_160517214	rs3766389	A	G	0.19	0.31	0.08	UTR3	CD84	.	P+K-	PK	0.03457	0.1348
1_182922215	rs78487548	G	T	0.28	0.31	0.08	exonic	SHCBP1L	nonsynonymous SNV	P+K-	PK	0.03457	0.055
1_200867492	rs2271018	C	G	0.22	0.31	0.08	exonic	INAVA	synonymous SNV	P+K-	PK	0.03457	0.1552
1_26286840	rs2782814	G	A	0.06	0.31	0.08	UTR3	PAFAH2	.	P+K-	PK	0.03457	0.1113
1_43664218	rs603123	C	T	0.14	0.31	0.08	exonic	CFAP57	synonymous SNV	P+K-	PK	0.03457	0.0847
10_115526177	rs10885500	A	G	0.19	0.31	0.08	exonic	PLEKHS1	synonymous SNV	P+K-	PK	0.03457	0.0847
10_17187634	rs34434809	G	C	0.31	0.31	0.08	UTR3	TRDMT1	.	P+K-	PK	0.03457	0.09423
10_44867769	rs3740085	C	G	0.22	0.31	0.08	UTR3	CXCL12	.	P+K-	PK	0.03457	0.09423
11_116660686	rs2266788	G	A	0.72	0.92	0.69	UTR3	APOA5	.	P+K-	PK	0.03457	0.06404
11_118618837	rs640120	A	C	0.94	0.92	0.69	UTR3	DDX6	.	P+K-	PK	0.03457	0.05527
11_118619423	rs1961138	C	T	0.92	0.92	0.69	UTR3	DDX6	.	P+K-	PK	0.03457	0.0632
11_118622245	rs485901	G	A	0.94	0.92	0.69	UTR3	DDX6	.	P+K-	PK	0.03457	0.05527
11_433867	rs12575508	G	A	0.22	0.31	0.08	exonic	ANO9	nonsynonymous SNV	P+K-	PK	0.03457	0.1348
11_60238138	rs3802954	T	C	0.17	0.31	0.08	UTR3	MS4A1	.	P+K-	PK	0.03457	0.0847
14_35263983	rs17102745	T	C	0.31	0.31	0.08	exonic	BAZ1A	synonymous SNV	P+K-	PK	0.03457	0.07949
16_30536918	rs10871453	C	G	0.14	0.31	0.08	exonic	ZNF768	nonsynonymous SNV	P+K-	PK	0.03457	0.0457
16_88782676	rs2290902	A	G	0.89	0.92	0.69	exonic	PIEZO1	synonymous SNV	P+K-	PK	0.03457	0.0632
16_88783521	rs6500491	T	C	0.86	0.92	0.69	exonic	PIEZO1	synonymous SNV	P+K-	PK	0.03457	0.0632
17_8048169	rs2253820	T	C	0.83	0.92	0.69	exonic	PER1	synonymous SNV	P+K-	PK	0.03457	0.0847
18_9886988	rs34812912	C	T	0.11	0.31	0.08	exonic	TXNDC2	nonsynonymous SNV	P+K-	PK	0.03457	0.1348
18_9887149	rs11662946	G	C	0.11	0.31	0.08	exonic	TXNDC2	nonsynonymous SNV	P+K-	PK	0.03457	0.1348
18_9888027	rs11664080	C	T	0.11	0.31	0.08	exonic	TXNDC2	synonymous SNV	P+K-	PK	0.03457	0.1348
2_187692305	rs12616053	T	C	0.36	0.31	0.08	UTR3	ZSWIM2	.	P+K-	PK	0.03457	0.055
2_187698751	rs7559533	G	A	0.36	0.31	0.08	exonic	ZSWIM2	synonymous SNV	P+K-	PK	0.03457	0.055
2_240115377	rs11685604	G	A	0.17	0.31	0.08	ncRNA_exonic	MGC16025	.	P+K-	PK	0.03457	0.0632
22_37466992	rs78174698	G	A	0.22	0.31	0.08	exonic	TMPRSS6	nonsynonymous SNV	P+K-	PK	0.03457	0.0632
3_46783757	rs57661142	T	G	0.25	0.31	0.08	ncRNA_exonic	PRSS45P	.	P+K-	PK	0.03457	0.09423
3_46783959	rs58830807	T	C	0.25	0.31	0.08	ncRNA_exonic	PRSS45P	.	P+K-	PK	0.03457	0.09423
3_46784467	rs58943210	G	A	0.25	0.31	0.08	ncRNA_exonic	PRSS45P	.	P+K-	PK	0.03457	0.09423
3_51812952	rs11130296	C	T	0.19	0.31	0.08	exonic	IQCF6	nonsynonymous SNV	P+K-	PK	0.03457	0.07949
5_132210436	rs803221	T	C	0.64	0.92	0.69	UTR3	LEAP2	.	P+K-	PK	0.03457	0.07949
6_30037686	rs8347	T	C	0.17	0.31	0.08	UTR3	PPP1R11	.	P+K-	PK	0.03457	0.1113
7_102760511	rs12540583	A	C	0.22	0.31	0.08	exonic	NAPEPLD	nonsynonymous SNV	P+K-	PK	0.03457	0.0632
7_123256427	rs6962756	C	T	0.92	0.92	0.69	exonic	ASB15	nonsynonymous SNV	P+K-	PK	0.03457	0.1113
7_35709842	rs3779234	C	T	0.36	0.31	0.08	exonic	HERPUD2	nonsynonymous SNV	P+K-	PK	0.03457	0.07949
14_94844843	rs1303	T	G	0.35	0.65	0.39	exonic	SERPINA1	nonsynonymous SNV	P+K-	PK	0.03521	0.04896
5_189799	rs3810865	T	C	0.58	0.65	0.39	UTR3	PLEKHG4B	.	P+K-	PK	0.03521	0.05256
6_160113872	rs4880	A	G	0.65	0.65	0.39	exonic	SOD2	nonsynonymous SNV	P+K-	PK	0.03521	0.04833
11_101869359	.	G	A	0.16	0.23	0.03	UTR3	CEP126	.	P+K-	PK	0.03552	0.05105
1_201179599	rs12021954	G	C	0.06	0.2	0	exonic	IGFN1	nonsynonymous SNV	P+K-	PK	0.03569	0.08259
10_129538535	rs75488244	A	T	0	0.2	0	UTR3	FOXI2	.	P+K-	PK	0.03569	0.09673
17_79279017	rs2056439	C	G	0.11	0.44	0.19	ncRNA_exonic	LINC00482	.	P+K-	PK	0.03569	0.04766
2_191069689	rs11542	T	A	0	0.25	0.03	UTR3	HIBCH	.	P+K-	PK	0.03625	0.04483
16_18817962	rs3751745	T	G	0.04	0.27	0.06	UTR3	SMG1	.	P+K-	PK	0.03634	0.04962
1_12787980	rs3010890	A	G	0.67	0.83	0.58	UTR3	AADACL3	.	P+K-	PK	0.0367	0.1285
1_149287681	rs146390398	G	C	0	0.14	0	upstream	LOC644634	.	P+K-	PK	0.0367	0.1507
10_17757296	rs1061162	G	A	0	0.14	0	UTR3	STAM	.	P+K-	PK	0.0367	0.09745
10_5807608	rs2497	A	G	0.36	0.42	0.17	UTR3	GDI2	.	P+K-	PK	0.0367	0.04661
10_76468851	rs1189553	C	T	0.83	0.83	0.58	UTR3	ADK	.	P+K-	PK	0.0367	0.09423
12_52315923	rs706819	T	C	0.67	0.83	0.58	UTR3	ACVRL1	.	P+K-	PK	0.0367	0.1285
12_85423743	rs7962577	T	C	0.33	0.42	0.17	UTR5	TSPAN19	.	P+K-	PK	0.0367	0.1073
12_85449465	rs7974418	T	A	0.33	0.42	0.17	exonic	LRRIQ1	synonymous SNV	P+K-	PK	0.0367	0.1073
15_53807540	rs3088091	G	A	0.36	0.42	0.17	UTR3	WDR72	.	P+K-	PK	0.0367	0.06404
15_90138670	rs8042146	C	T	0.81	0.83	0.58	exonic	TICRR	synonymous SNV	P+K-	PK	0.0367	0.06404
15_90176432	rs3803531	T	G	0.83	0.83	0.58	exonic	KIF7	synonymous SNV	P+K-	PK	0.0367	0.07949
16_31154146	rs1549299	G	A	0.22	0.42	0.17	exonic	PRSS36	synonymous SNV	P+K-	PK	0.0367	0.06404
17_80280865	rs11077986	G	A	0.22	0.42	0.17	exonic	SECTM1	synonymous SNV	P+K-	PK	0.0367	0.06404
19_3591590	rs2108389	T	C	0.33	0.42	0.17	UTR3	GIPC3	.	P+K-	PK	0.0367	0.04661
2_101965864	rs6543031	C	T	0.81	0.83	0.58	UTR3	CREG2	.	P+K-	PK	0.0367	0.1073
2_128400608	rs4662751	C	T	0.39	0.42	0.17	exonic	LIMS2	synonymous SNV	P+K-	PK	0.0367	0.07907
2_65496144	rs190577	A	G	0.72	0.83	0.58	UTR3	ACTR2	.	P+K-	PK	0.0367	0.06404
2_65497571	rs268878	C	A	0.72	0.83	0.58	UTR3	ACTR2	.	P+K-	PK	0.0367	0.06404
21_44834825	rs3366	G	A	0.69	0.83	0.58	UTR3	SIK1,SIK1B	.	P+K-	PK	0.0367	0.07208
3_121347927	rs7375038	T	A	0.44	0.42	0.17	UTR3	FBXO40	.	P+K-	PK	0.0367	0.07907
4_69176962	rs17089252	T	C	0.28	0.42	0.17	UTR3	YTHDC1	.	P+K-	PK	0.0367	0.1187
4_69178954	rs2293594	T	C	0.28	0.42	0.17	UTR3	YTHDC1	.	P+K-	PK	0.0367	0.1187
5_118175020	rs17144716	A	G	0.31	0.42	0.17	UTR3	DTWD2	.	P+K-	PK	0.0367	0.07907
6_30070932	rs2240071	C	G	0.25	0.42	0.17	UTR3	TRIM31	.	P+K-	PK	0.0367	0.07208
6_30070937	rs1110446	C	T	0.28	0.42	0.17	UTR3	TRIM31	.	P+K-	PK	0.0367	0.07208
6_32363955	rs2076529	T	C	0.31	0.42	0.17	exonic	BTNL2	synonymous SNV	P+K-	PK	0.0367	0.1073
6_46127836	rs2295017	T	A	0.25	0.42	0.17	UTR3	ENPP5	.	P+K-	PK	0.0367	0.07208
6_46128572	rs2295016	C	T	0.25	0.42	0.17	UTR3	ENPP5	.	P+K-	PK	0.0367	0.07208
7_112721571	rs56384744	C	A	0.11	0.42	0.17	UTR3	GPR85	.	P+K-	PK	0.0367	0.09423
7_6777369	rs35291651	T	C	0.22	0.42	0.17	ncRNA_exonic	PMS2CL	.	P+K-	PK	0.0367	0.06404
8_29205853	rs2280102	G	A	0.24	0.42	0.17	UTR5	DUSP4	.	P+K-	PK	0.0367	0.06021
2_241570249	rs3749172	A	C	0.6	0.76	0.5	exonic	GPR35	nonsynonymous SNV	P+K-	PK	0.03778	0.03953
2_47085398	rs2278711	C	T	0.44	0.5	0.24	ncRNA_exonic	LINC01119	.	P+K-	PK	0.03778	0.07892
1_120163531	rs10754416	T	C	0.47	0.82	0.58	UTR3	ZNF697	.	P+K-	PK	0.03783	0.07208
17_36830459	rs111565436	G	A	0.2	0.31	0.09	exonic	EPOP	nonsynonymous SNV	P+K-	PK	0.03859	0.05961
11_6579106	rs11040920	C	A	0.47	0.44	0.19	exonic	DNHD1	nonsynonymous SNV	P+K-	PK	0.03903	0.08047
12_70913328	rs1495340	G	A	0.31	0.44	0.19	UTR3	PTPRB	.	P+K-	PK	0.03903	0.06554
15_27112126	rs8036439	G	C	0.22	0.44	0.19	upstream	GABRA5	.	P+K-	PK	0.03903	0.06404
15_27112522	rs8041106	G	C	0.19	0.44	0.19	UTR5	GABRA5	.	P+K-	PK	0.03903	0.046
6_29893139	rs1610752	G	A	0.29	0.44	0.19	ncRNA_exonic	HCG4B	.	P+K-	PK	0.03903	0.04346
11_49207315	rs182169	A	G	0.42	0.47	0.21	exonic	FOLH1	synonymous SNV	P+K-	PK	0.03916	0.05258
1_53544289	rs11206087	C	T	0	0.17	0	exonic	PODN	synonymous SNV	P+K-	PK	0.03925	0.04614
13_19434585	rs2440021	A	G	0.17	0.17	0	ncRNA_intronic	ANKRD20A9P	.	P+K-	PK	0.03925	0.04483
16_87864375	rs566257213	C	T	0	0.17	0	UTR3	SLC7A5	.	P+K-	PK	0.03925	0.04614
17_7342806	rs11869879	C	T	0.07	0.17	0	upstream	FGF11	.	P+K-	PK	0.03925	0.04727
7_87505881	rs79407572	C	G	0.09	0.17	0	UTR5	DBF4	.	P+K-	PK	0.03925	0.04614
18_20877437	rs71360517	G	A	0.11	0.25	0.04	UTR3	TMEM241	.	P+K-	PK	0.03961	0.0483
5_50685505	rs2303751	A	G	0.19	0.34	0.12	exonic	ISL1	synonymous SNV	P+K-	PK	0.04014	0.04432
9_111934818	rs67412728	T	C	0.25	0.22	0	UTR3	EPB41L4B	.	P+K-	PK	0.04145	0.04338
1_12786273	rs3010885	T	C	0.64	0.81	0.56	UTR3	AADACL3	.	P+K-	PK	0.04198	0.07907
1_160832646	rs12036607	A	G	0.26	0.44	0.19	UTR5	CD244	.	P+K-	PK	0.04198	0.06021
1_197070776	rs10922162	C	T	0.28	0.44	0.19	exonic	ASPM	synonymous SNV	P+K-	PK	0.04198	0.07208
1_240654931	rs3748536	C	A	0.25	0.44	0.19	UTR3	GREM2	.	P+K-	PK	0.04198	0.07208
11_123894234	rs11219413	A	G	0.22	0.44	0.19	exonic	OR10G9	nonsynonymous SNV	P+K-	PK	0.04198	0.06404
11_123909695	rs3894197	G	C	0.5	0.81	0.56	exonic	OR10G7	nonsynonymous SNV	P+K-	PK	0.04198	0.07907
12_6715593	rs1734116	A	G	0.14	0.44	0.19	UTR5	CHD4	.	P+K-	PK	0.04198	0.055
14_93693604	rs10144530	T	G	0.25	0.44	0.19	UTR3	UBR7	.	P+K-	PK	0.04198	0.06404
17_290460	rs3201393	T	G	0.39	0.44	0.19	UTR3	RFLNB	.	P+K-	PK	0.04198	0.08497
19_1481559	rs1047852	C	T	0.44	0.44	0.19	UTR3	PCSK4	.	P+K-	PK	0.04198	0.05371
19_22940899	rs59017672	G	A	0.17	0.44	0.19	exonic	ZNF99	synonymous SNV	P+K-	PK	0.04198	0.09423
19_3592171	rs8105780	T	C	0.42	0.44	0.19	UTR3	GIPC3	.	P+K-	PK	0.04198	0.05054
2_121976519	rs6541771	G	A	0.58	0.81	0.56	UTR3	TFCP2L1	.	P+K-	PK	0.04198	0.1368
3_111260975	rs2276873	C	T	0.69	0.81	0.56	upstream	CD96	.	P+K-	PK	0.04198	0.07907
4_184562162	rs1046111	G	T	0.19	0.44	0.19	UTR3	RWDD4	.	P+K-	PK	0.04198	0.07208
4_420688	rs2280250	C	T	0.39	0.44	0.19	ncRNA_exonic	ABCA11P	.	P+K-	PK	0.04198	0.1368
4_434079	rs1045887	G	A	0.39	0.44	0.19	ncRNA_UTR3	ZNF721	.	P+K-	PK	0.04198	0.1285
6_12124855	rs2228213	G	A	0.25	0.44	0.19	exonic	HIVEP1	nonsynonymous SNV	P+K-	PK	0.04198	0.1073
6_29892732	rs1610750	G	A	0.33	0.44	0.19	ncRNA_exonic	HCG4B	.	P+K-	PK	0.04198	0.04661
6_30313340	rs6986	G	C	0.42	0.44	0.19	exonic	RPP21,TRIM39-RPP21	nonsynonymous SNV	P+K-	PK	0.04198	0.07208
7_130629094	rs1059698	A	C	0.33	0.44	0.19	ncRNA_exonic	LINC-PINT	.	P+K-	PK	0.04198	0.1187
7_149563738	rs3735330	G	T	0.41	0.44	0.19	UTR3	ZNF862	.	P+K-	PK	0.04198	0.07392
8_27941344	rs17487788	G	A	0.58	0.44	0.19	UTR5	NUGGC	.	P+K-	PK	0.04198	0.05771
9_116967405	rs13290696	G	T	0.25	0.44	0.19	exonic	COL27A1	synonymous SNV	P+K-	PK	0.04198	0.07208
3_120067797	rs4676696	G	A	0.07	0.14	0	exonic	LRRC58	synonymous SNV	P+K-	PK	0.04199	0.07
9_111778828	rs13296895	G	C	0.16	0.14	0	UTR3	TMEM245	.	P+K-	PK	0.04199	0.0483
9_36211827	rs1053414	C	T	0	0.14	0	UTR3	CLTA	.	P+K-	PK	0.04199	0.09745
6_408833	rs12211228	G	C	0.14	0.32	0.11	UTR3	IRF4	.	P+K-	PK	0.04203	0.07949
1_3663057	rs3737590	A	T	0.31	0.24	0.06	ncRNA_exonic	TP73-AS1	.	P+K-	PK	0.04263	0.09573
12_131625549	rs73149940	G	T	0.14	0.24	0.06	UTR3	ADGRD1	.	P+K-	PK	0.04263	0.0457
19_19367190	rs56278919	A	G	0.11	0.24	0.06	UTR3	HAPLN4	.	P+K-	PK	0.04263	0.0457
2_37035934	rs2072526	A	G	0.18	0.24	0.06	exonic	VIT	nonsynonymous SNV	P+K-	PK	0.04263	0.08543
3_197804058	rs58082632	G	A	0.03	0.24	0.06	ncRNA_exonic	ANKRD18DP	.	P+K-	PK	0.04263	0.05184
4_68483472	rs1048447	A	G	0.29	0.24	0.06	UTR3	UBA6	.	P+K-	PK	0.04263	0.07517
9_140268046	rs7389250	C	T	0.06	0.21	0.03	exonic	EXD3	synonymous SNV	P+K-	PK	0.043	0.0483
10_123687456	rs79570924	G	A	0.03	0.13	0	exonic	ATE1	synonymous SNV	P+K-	PK	0.04313	0.08872
12_49331679	rs41291977	T	G	0.06	0.13	0	UTR3	ARF3	.	P+K-	PK	0.04313	0.05813
14_66136163	rs35949016	C	A	0.31	0.47	0.22	exonic	FUT8	nonsynonymous SNV	P+K-	PK	0.04346	0.07392
17_290362	rs12776	C	G	0.5	0.47	0.22	UTR3	RFLNB	.	P+K-	PK	0.04346	0.0561
17_290370	rs13072	A	C	0.5	0.47	0.22	UTR3	RFLNB	.	P+K-	PK	0.04346	0.0561
3_160154258	rs1047210	A	C	0.33	0.47	0.22	ncRNA_UTR3	TRIM59	.	P+K-	PK	0.04346	0.05619
2_26687761	rs17005371	G	A	0	0.13	0	exonic	OTOF	nonsynonymous SNV	P+K-	PK	0.04416	0.1074
20_57042665	rs7265854	A	G	0.08	0.13	0	exonic	APCDD1L	nonsynonymous SNV	P+K-	PK	0.04416	0.05548
4_1191137	rs375905052	A	C	0.03	0.13	0	ncRNA_exonic	LOC100130872	.	P+K-	PK	0.04416	0.09897
5_150948016	rs3734062	C	T	0	0.13	0	exonic	FAT2	synonymous SNV	P+K-	PK	0.04416	0.2177
6_132930324	rs7759004	T	C	0.17	0.13	0	ncRNA_exonic	TAAR3P	.	P+K-	PK	0.04416	0.08024
9_96793194	rs368600316	T	C	0	0.13	0	UTR5	PTPDC1	.	P+K-	PK	0.04416	0.05058
17_7402600	rs2228129	T	C	0.62	0.88	0.65	exonic	POLR2A	synonymous SNV	P+K-	PK	0.04432	0.04999
17_54967528	rs2525998	A	G	0.3	0.63	0.34	UTR3	TRIM25	.	P+K-	PK	0.04457	0.04662
1_116677846	rs6677552	T	C	0	0.18	0	UTR3	MAB21L3	.	P+K-	PK	0.04483	0.09158
17_59763465	rs4986765	T	C	0.76	0.75	0.5	exonic	BRIP1	synonymous SNV	P+K-	PK	0.04509	0.06488
1_111992019	rs2298187	T	A	0.17	0.33	0.11	upstream	ATP5PB,WDR77	.	P+K-	PK	0.0451	0.09423
1_200522566	rs12120084	G	C	0.28	0.33	0.11	exonic	KIF14	nonsynonymous SNV	P+K-	PK	0.0451	0.07949
1_201299785	rs2365648	A	C	0.94	0.89	0.67	UTR3	PKP1	.	P+K-	PK	0.0451	0.1113
1_205588637	rs3789461	C	T	0.28	0.33	0.11	UTR3	ELK4	.	P+K-	PK	0.0451	0.07949
1_3753136	rs2275824	A	T	0.31	0.33	0.11	exonic	CEP104	nonsynonymous SNV	P+K-	PK	0.0451	0.07949
1_3761479	rs2275822	C	T	0.31	0.33	0.11	exonic	CEP104	synonymous SNV	P+K-	PK	0.0451	0.07949
1_53995515	rs12021912	G	A	0.08	0.33	0.11	exonic	GLIS1	synonymous SNV	P+K-	PK	0.0451	0.0632
10_95259979	rs3740370	C	G	0.14	0.33	0.11	exonic	CEP55	nonsynonymous SNV	P+K-	PK	0.0451	0.07949
11_122776007	rs74695569	T	C	0.25	0.33	0.11	UTR3	JHY	.	P+K-	PK	0.0451	0.06404
12_106751875	rs17285274	C	T	0.19	0.33	0.11	UTR5	POLR3B	.	P+K-	PK	0.0451	0.1348
12_110369872	rs3742010	G	A	0.25	0.33	0.11	UTR3	GIT2	.	P+K-	PK	0.0451	0.1552
12_110370141	rs7314498	C	T	0.25	0.33	0.11	UTR3	GIT2	.	P+K-	PK	0.0451	0.1552
12_110476595	rs1044994	T	A	0.25	0.33	0.11	UTR3	ANKRD13A	.	P+K-	PK	0.0451	0.1552
12_117652838	rs2682826	G	A	0.17	0.33	0.11	UTR3	NOS1	.	P+K-	PK	0.0451	0.1552
12_6619284	rs714774	C	G	0.61	0.89	0.67	exonic	NCAPD2	nonsynonymous SNV	P+K-	PK	0.0451	0.1073
12_6637845	rs2072374	T	C	0.67	0.89	0.67	exonic	NCAPD2	synonymous SNV	P+K-	PK	0.0451	0.07949
12_85438499	rs3765044	G	A	0.19	0.33	0.11	exonic	LRRIQ1	nonsynonymous SNV	P+K-	PK	0.0451	0.09423
12_85466723	rs17012533	G	A	0.19	0.33	0.11	exonic	LRRIQ1	nonsynonymous SNV	P+K-	PK	0.0451	0.09423
13_19648358	rs4769379	T	C	0.08	0.33	0.11	ncRNA_exonic	LOC107984132	.	P+K-	PK	0.0451	0.1348
13_28239940	rs11029	G	C	0.31	0.33	0.11	exonic	POLR1D	synonymous SNV	P+K-	PK	0.0451	0.06404
14_96748991	rs3809421	A	G	0.86	0.89	0.67	UTR3	ATG2B	.	P+K-	PK	0.0451	0.0632
15_31793930	rs7164569	A	G	0.25	0.33	0.11	exonic	OTUD7A	synonymous SNV	P+K-	PK	0.0451	0.06404
15_51501404	rs12148604	C	T	0.33	0.33	0.11	ncRNA_UTR3	CYP19A1	.	P+K-	PK	0.0451	0.055
16_16291971	rs9940825	C	T	0.08	0.33	0.11	exonic	ABCC6	synonymous SNV	P+K-	PK	0.0451	0.1348
17_73588542	rs736521	A	G	0.19	0.33	0.11	intronic	MYO15B	.	P+K-	PK	0.0451	0.1348
17_78078709	rs1800300	T	C	0.83	0.89	0.67	exonic	GAA	synonymous SNV	P+K-	PK	0.0451	0.07949
2_179571448	rs4893852	A	G	0.17	0.33	0.11	exonic	TTN	nonsynonymous SNV	P+K-	PK	0.0451	0.1348
2_179578704	rs13398235	G	A	0.17	0.33	0.11	exonic	TTN	nonsynonymous SNV	P+K-	PK	0.0451	0.1348
2_223064768	rs12620338	G	A	0.25	0.33	0.11	UTR3	PAX3	.	P+K-	PK	0.0451	0.1073
2_240115372	rs11692243	A	G	0.17	0.33	0.11	ncRNA_exonic	MGC16025	.	P+K-	PK	0.0451	0.0632
2_240116662	rs3791575	C	T	0.17	0.33	0.11	ncRNA_exonic	MGC16025	.	P+K-	PK	0.0451	0.0632
2_27171245	rs10181727	C	T	0.33	0.33	0.11	UTR3	DPYSL5	.	P+K-	PK	0.0451	0.06404
2_27172069	rs1057115	T	C	0.33	0.33	0.11	UTR3	DPYSL5	.	P+K-	PK	0.0451	0.06404
21_19169218	rs2824495	G	C	0.22	0.33	0.11	exonic	C21orf91	nonsynonymous SNV	P+K-	PK	0.0451	0.055
21_45177255	rs3746954	C	A	0.17	0.33	0.11	UTR3	PDXK	.	P+K-	PK	0.0451	0.07949
3_56667682	rs9835332	G	C	0.81	0.89	0.67	exonic	TASOR	nonsynonymous SNV	P+K-	PK	0.0451	0.07949
4_175239953	rs114313926	C	T	0.15	0.33	0.11	UTR3	CEP44	.	P+K-	PK	0.0451	0.05943
4_175241476	rs76337635	G	A	0.15	0.33	0.11	UTR3	CEP44	.	P+K-	PK	0.0451	0.07949
5_114480364	rs7716270	C	T	0.33	0.33	0.11	exonic	TRIM36	synonymous SNV	P+K-	PK	0.0451	0.1073
5_118173981	rs17144714	C	T	0.28	0.33	0.11	UTR3	DTWD2	.	P+K-	PK	0.0451	0.09423
5_14420027	rs30612	A	C	0.64	0.89	0.67	exonic	TRIO	synonymous SNV	P+K-	PK	0.0451	0.09423
5_147024476	rs2116766	C	A	0.22	0.33	0.11	exonic	JAKMIP2	synonymous SNV	P+K-	PK	0.0451	0.09423
5_156187928	rs284445	C	T	0.11	0.33	0.11	UTR3	SGCD	.	P+K-	PK	0.0451	0.055
5_75884734	rs1131232	G	A	0.81	0.89	0.67	exonic	IQGAP2	synonymous SNV	P+K-	PK	0.0451	0.07949
6_132022419	rs201739285	G	A	0.14	0.33	0.11	exonic	OR2A4	synonymous SNV	P+K-	PK	0.0451	0.09423
6_7250960	rs2714338	G	A	0.44	0.33	0.11	UTR3	RREB1	.	P+K-	PK	0.0451	0.07907
7_90836643	rs12538034	C	T	0.14	0.33	0.11	UTR3	CDK14	.	P+K-	PK	0.0451	0.07949
8_52232487	rs1052704	G	T	0.28	0.33	0.11	exonic	PXDNL	nonsynonymous SNV	P+K-	PK	0.0451	0.055
8_52233408	rs7827446	C	T	0.28	0.33	0.11	exonic	PXDNL	nonsynonymous SNV	P+K-	PK	0.0451	0.055
1_233091463	rs12725558	T	A	0.14	0.25	0.06	exonic	NTPCR	synonymous SNV	P+K-	PK	0.0457	0.1113
1_236748433	rs3738535	G	A	0.03	0.25	0.06	exonic	HEATR1	synonymous SNV	P+K-	PK	0.0457	0.1065
1_236749626	rs3738541	C	T	0.03	0.25	0.06	exonic	HEATR1	synonymous SNV	P+K-	PK	0.0457	0.1065
1_43638410	rs1782386	G	C	0.14	0.25	0.06	UTR5	CFAP57	.	P+K-	PK	0.0457	0.0847
1_59041655	rs41313363	T	C	0.17	0.25	0.06	UTR3	TACSTD2	.	P+K-	PK	0.0457	0.1113
10_133996083	rs3750698	G	A	0.08	0.25	0.06	UTR3	JAKMIP3	.	P+K-	PK	0.0457	0.1514
11_102562700	rs2509010	C	T	0.14	0.25	0.06	exonic	MMP27	nonsynonymous SNV	P+K-	PK	0.0457	0.0847
11_18158993	rs12291017	T	C	0.06	0.25	0.06	exonic	MRGPRX3	nonsynonymous SNV	P+K-	PK	0.0457	0.1514
11_18159938	rs111567050	T	C	0.06	0.25	0.06	UTR3	MRGPRX3	.	P+K-	PK	0.0457	0.1514
11_22242729	rs4312063	T	C	0.92	0.94	0.75	exonic	ANO5	synonymous SNV	P+K-	PK	0.0457	0.0847
12_64539680	rs789735	T	A	0.08	0.25	0.06	UTR3	SRGAP1	.	P+K-	PK	0.0457	0.0847
12_64539726	rs789734	C	A	0.08	0.25	0.06	UTR3	SRGAP1	.	P+K-	PK	0.0457	0.0847
13_100888122	rs538229	A	G	0.11	0.25	0.06	exonic	PCCA	synonymous SNV	P+K-	PK	0.0457	0.1065
14_33015082	rs17099240	A	G	0.08	0.25	0.06	exonic	AKAP6	nonsynonymous SNV	P+K-	PK	0.0457	0.1514
16_1251803	rs9922076	C	T	0.06	0.25	0.06	exonic	CACNA1H	synonymous SNV	P+K-	PK	0.0457	0.0847
17_26206414	rs3751972	C	A	0.92	0.94	0.75	UTR3	LYRM9	.	P+K-	PK	0.0457	0.0847
17_27587796	rs16964955	T	C	0.11	0.25	0.06	UTR3	NUFIP2	.	P+K-	PK	0.0457	0.1065
19_39230748	rs34911882	C	G	0.11	0.25	0.06	exonic	CAPN12	synonymous SNV	P+K-	PK	0.0457	0.1065
19_53848779	rs75887836	T	C	0.19	0.25	0.06	exonic	ZNF845	synonymous SNV	P+K-	PK	0.0457	0.0847
19_53848837	rs56683540	C	T	0.19	0.25	0.06	exonic	ZNF845	synonymous SNV	P+K-	PK	0.0457	0.0847
19_53848845	rs57319493	G	A	0.19	0.25	0.06	exonic	ZNF845	synonymous SNV	P+K-	PK	0.0457	0.0847
19_8176569	rs35306870	G	A	0.22	0.25	0.06	exonic	FBN3	synonymous SNV	P+K-	PK	0.0457	0.1113
19_8176640	rs12975322	C	T	0.22	0.25	0.06	exonic	FBN3	nonsynonymous SNV	P+K-	PK	0.0457	0.1113
19_9449888	rs77267061	A	G	0.17	0.25	0.06	exonic	ZNF559	nonsynonymous SNV	P+K-	PK	0.0457	0.1514
2_169952233	rs1059261	T	C	0.17	0.25	0.06	exonic	DHRS9	synonymous SNV	P+K-	PK	0.0457	0.0847
2_191066683	rs4853685	C	T	0.15	0.25	0.06	UTR3	C2orf88	.	P+K-	PK	0.0457	0.05943
2_20110856	rs3731661	G	A	0.25	0.25	0.06	UTR3	WDR35	.	P+K-	PK	0.0457	0.0847
20_43936931	rs2743317	C	T	0.36	0.25	0.06	UTR5	MATN4	.	P+K-	PK	0.0457	0.07949
20_43944958	rs2741500	G	T	0.36	0.25	0.06	exonic	RBPJL	synonymous SNV	P+K-	PK	0.0457	0.07949
20_56941286	rs35136891	C	A	0.25	0.25	0.06	UTR3	RAB22A	.	P+K-	PK	0.0457	0.0847
22_25119210	rs56199175	A	C	0.08	0.25	0.06	exonic	PIWIL3	synonymous SNV	P+K-	PK	0.0457	0.0847
4_106630007	rs28450989	G	C	0.11	0.25	0.06	UTR5	GSTCD	.	P+K-	PK	0.0457	0.1514
4_122618117	rs113588187	C	T	0.17	0.25	0.06	UTR5	ANXA5	.	P+K-	PK	0.0457	0.0632
4_185677421	rs8086	C	T	0.11	0.25	0.06	UTR3	ACSL1	.	P+K-	PK	0.0457	0.1065
5_180631778	rs2770944	A	G	0.22	0.25	0.06	exonic	TRIM7	synonymous SNV	P+K-	PK	0.0457	0.0847
5_74656175	rs5909	G	A	0.11	0.25	0.06	UTR3	HMGCR	.	P+K-	PK	0.0457	0.1065
5_74668589	rs17562686	C	T	0.14	0.25	0.06	UTR3	CERT1	.	P+K-	PK	0.0457	0.0847
6_160637844	rs3127592	T	C	0.08	0.25	0.06	UTR3	SLC22A2	.	P+K-	PK	0.0457	0.1065
6_160638104	rs3127594	T	A	0.11	0.25	0.06	UTR3	SLC22A2	.	P+K-	PK	0.0457	0.0847
6_166952264	rs1003857	G	A	0.78	0.94	0.75	exonic	RPS6KA2	synonymous SNV	P+K-	PK	0.0457	0.0847
7_123508309	rs1034955	G	A	0.11	0.25	0.06	UTR5	HYAL4	.	P+K-	PK	0.0457	0.0847
7_66107971	rs73133851	C	G	0.08	0.25	0.06	UTR3	KCTD7	.	P+K-	PK	0.0457	0.1514
7_75046592	rs113975841	T	G	0.14	0.25	0.06	UTR3	POM121C	.	P+K-	PK	0.0457	0.0847
7_75053499	rs113744930	G	A	0.14	0.25	0.06	exonic	POM121C	nonsynonymous SNV	P+K-	PK	0.0457	0.0847
8_142490120	rs2748416	G	T	0.83	0.94	0.75	exonic	MROH5	unknown	P+K-	PK	0.0457	0.0847
8_29989564	rs7844812	A	G	0.92	0.94	0.75	exonic	MBOAT4	synonymous SNV	P+K-	PK	0.0457	0.1514
9_140638416	rs1129767	G	A	0.39	0.25	0.06	exonic	EHMT1	synonymous SNV	P+K-	PK	0.0457	0.06404
19_22849806	rs62118833	A	G	0	0.19	0.03	UTR3	ZNF492	.	P+K-	PK	0.04573	0.1139
7_6859402	rs200223833	G	A	0.03	0.19	0.03	exonic	CCZ1B	synonymous SNV	P+K-	PK	0.04573	0.1084
9_129597065	rs12683887	C	T	0	0.19	0.03	UTR3	ZBTB43	.	P+K-	PK	0.04573	0.05548
9_35479920	rs41277047	T	A	0.09	0.19	0.03	ncRNA_exonic	ATP8B5P	.	P+K-	PK	0.04573	0.07284
6_76625079	rs699186	T	C	0.31	0.33	0.12	UTR3	MYO6	.	P+K-	PK	0.046	0.055
7_45223259	rs12702121	A	G	0.31	0.33	0.12	UTR3	RAMP3	.	P+K-	PK	0.046	0.06404
13_19428799	rs147627378	C	T	0.19	0.25	0.06	ncRNA_intronic	ANKRD20A9P	.	P+K-	PK	0.04626	0.05184
5_68505854	rs60113639	A	C	0.04	0.33	0.08	UTR3	CENPH	.	P+K-	PK	0.04644	0.05575
11_117989554	rs3741311	G	A	0.78	0.78	0.53	UTR3	TMPRSS4	.	P+K-	PK	0.04661	0.1187
16_771181	rs56225914	C	G	0.44	0.47	0.22	UTR5	ANTKMT	.	P+K-	PK	0.04661	0.05054
18_30092097	rs718721	C	T	0.61	0.78	0.53	ncRNA_exonic	WBP11P1	.	P+K-	PK	0.04661	0.05371
18_30093722	rs11081773	A	C	0.61	0.78	0.53	ncRNA_exonic	WBP11P1	.	P+K-	PK	0.04661	0.07907
18_30093946	rs11873902	A	C	0.61	0.78	0.53	ncRNA_exonic	WBP11P1	.	P+K-	PK	0.04661	0.07907
19_17448961	rs1864112	A	C	0.72	0.78	0.53	exonic	GTPBP3	synonymous SNV	P+K-	PK	0.04661	0.07208
19_17450016	rs3810206	T	C	0.72	0.78	0.53	exonic	GTPBP3	nonsynonymous SNV	P+K-	PK	0.04661	0.07208
3_130098349	rs16845861	G	A	0.31	0.47	0.22	exonic	COL6A5	synonymous SNV	P+K-	PK	0.04661	0.08497
3_130103709	rs1453241	G	A	0.31	0.47	0.22	exonic	COL6A5	nonsynonymous SNV	P+K-	PK	0.04661	0.08497
4_17884986	rs16895971	T	C	0.56	0.47	0.22	UTR3	LCORL	.	P+K-	PK	0.04661	0.08979
6_90340276	rs3210511	G	A	0.36	0.47	0.22	exonic	ANKRD6	synonymous SNV	P+K-	PK	0.04661	0.07208
6_90390443	rs9353689	C	A	0.36	0.47	0.22	exonic	MDN1	nonsynonymous SNV	P+K-	PK	0.04661	0.07208
8_133074827	rs3802261	A	G	0.36	0.47	0.22	UTR3	HHLA1	.	P+K-	PK	0.04661	0.07208
8_22477585	rs1869	C	T	0.28	0.47	0.22	UTR3	CCAR2	.	P+K-	PK	0.04661	0.07907
8_29207845	rs3182143	C	T	0.25	0.47	0.22	UTR5	DUSP4	.	P+K-	PK	0.04661	0.07907
8_29207872	rs2637819	G	A	0.22	0.47	0.22	UTR5	DUSP4	.	P+K-	PK	0.04661	0.07907
19_47112648	rs10113	T	C	0.32	0.5	0.25	UTR3	CALM3	.	P+K-	PK	0.04722	0.07233
5_96245439	rs1056893	C	T	0.5	0.53	0.28	exonic	ERAP2	synonymous SNV	P+K-	PK	0.04726	0.05107
3_129120177	rs72984739	A	G	0	0.15	0	UTR3	EFCAB12	.	P+K-	PK	0.04727	0.09158
9_26994221	rs10812510	A	T	0.08	0.14	0	UTR3	LRRC19	.	P+K-	PK	0.04826	0.06968
20_4229514	rs184418609	T	C	0.53	0.47	0.24	exonic	ADRA1D	nonsynonymous SNV	P+K-	PK	0.04833	0.08047
5_100145177	.	G	A	0.18	0.25	0.06	UTR3	ST8SIA4	.	P+K-	PK	0.04928	0.1124
17_290552	rs7223337	A	G	0	0.21	0	UTR3	RFLNB	.	P+K-	PK	0.04965	0.07843
11_61567753	rs174544	C	A	0	0.13	0	UTR3	FADS1	.	P+K-	PK	0.04989	0.09897
12_113537562	rs12422636	C	T	0.14	0.13	0	UTR3	RASAL1	.	P+K-	PK	0.04989	0.05058
15_30506636	rs368068835	C	A	0.03	0.13	0	ncRNA_exonic	LINC02249	.	P+K-	PK	0.04989	0.05339
19_51602298	rs12983578	C	G	0.11	0.13	0	exonic	CTU1	nonsynonymous SNV	P+K-	PK	0.04989	0.1084
20_32664880	.	T	C	0.04	0.13	0	exonic	RALY	synonymous SNV	P+K-	PK	0.04989	0.08872
6_119245024	rs12197931	C	T	0.03	0.13	0	exonic	MCM9	synonymous SNV	P+K-	PK	0.04989	0.05282
7_138418910	rs1026435	G	A	0.67	0.53	0.97	exonic	ATP6V0A4	synonymous SNV	P-K+	PK	1.54e-05	0.07208
4_6304344	rs1046320	G	A	0.56	0.31	0.94	UTR3	WFS1	.	P-K+	PK	2.94e-05	0.01039
1_18810486	rs1889862	A	C	0.19	0	0.36	UTR3	KLHDC7A	.	P-K+	PK	6.52e-05	0.07949
7_5346735	rs1131911	T	C	0.94	0.64	1	UTR3	TNRC18	.	P-K+	PK	6.52e-05	0.02813
19_58619847	rs933670	C	T	0.83	0.53	0.94	intronic	ZSCAN18	.	P-K+	PK	9.77e-05	0.06404
6_160103084	rs5746136	C	T	0.25	0.11	0.56	UTR3	SOD2	.	P-K+	PK	0.0001189	0.04661
19_58609677	rs2554978	C	G	0.83	0.5	0.92	UTR5	ZSCAN18	.	P-K+	PK	0.0001824	0.07949
19_58620068	rs918545	T	C	0.83	0.5	0.92	intronic	ZSCAN18	.	P-K+	PK	0.0001824	0.07949
19_58620103	rs918544	T	A	0.83	0.5	0.92	intronic	ZSCAN18	.	P-K+	PK	0.0001824	0.07949
19_58620524	rs2554982	C	T	0.78	0.5	0.92	intronic	ZSCAN18	.	P-K+	PK	0.0001824	0.055
3_40503809	rs11539046	G	A	0.56	0.5	0.92	UTR3	RPL14	.	P-K+	PK	0.0001824	0.08497
3_123411589	rs40305	G	A	0.22	0.08	0.5	exonic	MYLK	synonymous SNV	P-K+	PK	0.0002147	0.04903
2_40339986	rs5551	T	C	0.72	0.56	0.94	ncRNA_UTR3	SLC8A1	.	P-K+	PK	0.0002376	0.06404
19_4558431	rs2304213	C	G	0.47	0.22	0.67	exonic	SEMA6B	synonymous SNV	P-K+	PK	0.0003045	0.05851
16_89295345	rs12926572	A	G	0.15	0	0.31	UTR3	ZNF778	.	P-K+	PK	0.0003976	0.05943
9_106856952	rs4742904	C	T	0.38	0.14	0.56	UTR5	SMC2	.	P-K+	PK	0.0004077	0.08128
9_106856972	rs4742905	G	C	0.38	0.14	0.56	UTR5	SMC2	.	P-K+	PK	0.0004077	0.08128
16_89289624	rs12920028	G	A	0.14	0	0.31	exonic	ZNF778	synonymous SNV	P-K+	PK	0.0004099	0.0457
2_68402652	rs13004407	C	T	0.15	0	0.31	UTR3	PNO1	.	P-K+	PK	0.0004099	0.01493
14_51370852	rs34800262	C	G	0.08	0.08	0.47	exonic	ABHD12B	nonsynonymous SNV	P-K+	PK	0.0004321	0.0451
3_195311030	rs1568564	C	T	0.11	0	0.5	upstream	APOD	.	P-K+	PK	0.0004359	0.008399
19_3595923	rs1131882	G	A	0.33	0.06	0.42	exonic	TBXA2R	synonymous SNV	P-K+	PK	0.0005575	0.0367
22_51183255	rs5771002	A	G	0.84	0.53	0.93	exonic	ACR	nonsynonymous SNV	P-K+	PK	0.0005678	0.0327
12_106459902	rs6539247	T	C	0.59	0.35	0.78	UTR3	NUAK1	.	P-K+	PK	0.0006062	0.05146
6_90347511	rs34012596	T	C	0.44	0.19	0.61	exonic	LYRM2	nonsynonymous SNV	P-K+	PK	0.0006403	0.08979
3_44775962	rs4682752	A	G	0.69	0.5	0.89	exonic	ZNF501	nonsynonymous SNV	P-K+	PK	0.0006708	0.06404
16_30408961	rs61978578	C	T	0.36	0.21	0.61	exonic	ZNF48	synonymous SNV	P-K+	PK	0.0007184	0.034
5_57755703	rs3211270	C	T	0.47	0.22	0.64	exonic	PLK2	synonymous SNV	P-K+	PK	0.0007335	0.05771
6_29053998	rs7752270	G	A	0.14	0.03	0.36	UTR3	OR2B3	.	P-K+	PK	0.0007361	0.05943
14_94983794	rs17752900	C	T	0.27	0.04	0.39	UTR5	SERPINA12	.	P-K+	PK	0.0008584	0.03405
9_106896809	rs7872034	G	A	0.25	0.09	0.47	exonic	SMC2	synonymous SNV	P-K+	PK	0.0008697	0.02528
16_678843	rs1984395	C	T	0.5	0.2	0.63	UTR3	RAB40C	.	P-K+	PK	0.0008804	0.02577
9_106903466	rs10991118	A	G	0.23	0.14	0.53	UTR3	SMC2	.	P-K+	PK	0.0009343	0.05709
1_18810484	rs1889861	G	A	0.14	0	0.28	UTR3	KLHDC7A	.	P-K+	PK	0.0009713	0.0847
11_89935586	rs1045861	G	T	0.81	0.56	0.92	exonic	CHORDC1	nonsynonymous SNV	P-K+	PK	0.0009839	0.055
2_40341660	rs5542	C	T	0.69	0.56	0.92	ncRNA_UTR3	SLC8A1	.	P-K+	PK	0.0009839	0.07208
7_138417718	rs3807154	A	G	0.67	0.56	0.92	exonic	ATP6V0A4	synonymous SNV	P-K+	PK	0.0009839	0.1187
6_112671611	rs11153361	G	A	0.06	0.09	0.44	exonic	RFPL4B	nonsynonymous SNV	P-K+	PK	0.001042	0.0632
16_839084	rs2277901	A	C	0.08	0.07	0.44	exonic	CHTF18	nonsynonymous SNV	P-K+	PK	0.001097	0.0311
19_56030009	rs925878	C	T	0.07	0.07	0.46	exonic	SSC5D	nonsynonymous SNV	P-K+	PK	0.001163	0.01387
19_30314666	rs7257694	C	T	0.25	0.06	0.39	exonic	CCNE1	synonymous SNV	P-K+	PK	0.001263	0.09423
1_22357229	rs3820687	A	T	0.33	0.25	0.66	ncRNA_exonic	LINC00339	.	P-K+	PK	0.001309	0.04726
11_47280762	rs11039155	G	A	0.22	0.03	0.33	UTR5	NR1H3	.	P-K+	PK	0.001336	0.0632
16_89284286	rs3803722	A	G	0.17	0.03	0.33	UTR5	ZNF778	.	P-K+	PK	0.001336	0.0632
14_104029449	rs2274267	G	A	0.09	0	0.28	exonic	COA8	synonymous SNV	P-K+	PK	0.001347	0.03772
7_20824614	rs34908430	C	T	0.39	0	0.44	exonic	SP8	synonymous SNV	P-K+	PK	0.00137	0.01318
19_55441995	rs269951	A	G	0.56	0.42	0.81	exonic	NLRP7	synonymous SNV	P-K+	PK	0.001451	0.05771
9_106856910	rs4743687	C	T	0.44	0.19	0.58	UTR5	SMC2	.	P-K+	PK	0.001451	0.05611
19_47922459	rs141322934	A	G	0.22	0	0.31	UTR5	MEIS3	.	P-K+	PK	0.001472	0.0378
2_234378902	rs1053895	T	C	0.75	0.53	0.89	UTR3	DGKD	.	P-K+	PK	0.001493	0.0367
20_61294415	rs2282314	A	G	0.19	0.11	0.47	ncRNA_exonic	SLCO4A1-AS1	.	P-K+	PK	0.001493	0.055
3_44791200	rs6792299	T	A	0.72	0.53	0.89	UTR3	KIAA1143	.	P-K+	PK	0.001493	0.06404
7_129916515	rs17590	T	C	0.67	0.53	0.89	exonic	CPA2	synonymous SNV	P-K+	PK	0.001493	0.1073
19_2836339	rs72982740	G	A	0.41	0.25	0.65	UTR3	ZNF554	.	P-K+	PK	0.001555	0.01859
5_145442203	rs1056149	G	C	0.62	0.67	0.97	exonic	SH3RF2	nonsynonymous SNV	P-K+	PK	0.001617	0.02701
3_49689210	rs34762726	G	A	0.27	0	0.29	exonic	BSN	nonsynonymous SNV	P-K+	PK	0.001622	0.0248
17_1657653	rs1057335	G	A	0.44	0.25	0.64	exonic	SERPINF2	nonsynonymous SNV	P-K+	PK	0.001649	0.05886
12_48177170	rs757342	C	G	0	0	0.39	UTR3	HDAC7	.	P-K+	PK	0.001707	0.04311
1_18808711	rs2992751	G	C	0.06	0	0.27	exonic	KLHDC7A	synonymous SNV	P-K+	PK	0.001731	0.06874
12_106460091	rs6539248	G	A	0.67	0.5	0.86	UTR3	NUAK1	.	P-K+	PK	0.001748	0.04339
14_52182081	rs731715	T	A	0.56	0.39	0.76	exonic	FRMD6	synonymous SNV	P-K+	PK	0.001852	0.04709
6_30131546	rs17194460	A	G	0.44	0.31	0.69	exonic	TRIM15	nonsynonymous SNV	P-K+	PK	0.001968	0.05771
17_72469966	rs2272111	G	A	0.18	0.15	0.57	exonic	CD300A	nonsynonymous SNV	P-K+	PK	0.001975	0.0198
17_43923180	rs242944	G	A	0.72	0.69	0.97	exonic	SPPL2C	nonsynonymous SNV	P-K+	PK	0.001991	0.07718
1_156499969	rs1171566	T	C	0.64	0.5	0.86	exonic	IQGAP3	synonymous SNV	P-K+	PK	0.002046	0.06404
4_154631563	rs1339	T	C	0.03	0	0.26	exonic	RNF175	nonsynonymous SNV	P-K+	PK	0.002129	0.05079
6_160169258	rs7766006	G	T	0.25	0.08	0.42	exonic	WTAP	synonymous SNV	P-K+	PK	0.002157	0.0632
6_160198359	rs3464	C	T	0.25	0.08	0.42	exonic	ACAT2	synonymous SNV	P-K+	PK	0.002157	0.0632
6_160206716	rs3818298	T	C	0.22	0.08	0.42	ncRNA_exonic	SNORA29	.	P-K+	PK	0.002157	0.055
14_93651054	rs8017818	A	G	0.08	0	0.25	UTR5	MOAP1	.	P-K+	PK	0.002212	0.1065
21_22115947	rs229360	C	G	0.89	0.75	1	ncRNA_exonic	LINC00320	.	P-K+	PK	0.002212	0.0847
3_44762830	rs56084453	A	G	0.17	0	0.25	exonic	ZNF502	nonsynonymous SNV	P-K+	PK	0.002212	0.05527
6_2890190	rs1052886	A	G	0.08	0	0.25	ncRNA_UTR3	SERPINB9	.	P-K+	PK	0.002212	0.1065
19_58774762	rs260464	G	T	0.64	0.28	0.69	UTR3	ZNF544	.	P-K+	PK	0.002412	0.03022
1_197874949	rs2270763	T	C	0.29	0.12	0.47	exonic	C1orf53	synonymous SNV	P-K+	PK	0.002446	0.03306
1_1404236	rs1240730	C	T	0.25	0.04	0.45	UTR3	ATAD3C	.	P-K+	PK	0.002489	0.01893
9_130191186	rs13292096	C	T	0.38	0.13	0.64	exonic	ZNF79	nonsynonymous SNV	P-K+	PK	0.00249	0.01137
11_101454488	rs3824934	G	C	0.33	0.17	0.53	UTR5	TRPC6	.	P-K+	PK	0.002602	0.02873
6_118823975	rs11967375	A	G	0.42	0.17	0.53	ncRNA_exonic	BRD7P3	.	P-K+	PK	0.002602	0.07907
3_195516878	rs2177336	T	C	0.56	0.33	0.72	exonic	MUC4	nonsynonymous SNV	P-K+	PK	0.002668	0.0561
19_1228191	rs10415095	T	C	0.72	0.56	0.89	UTR3	STK11	.	P-K+	PK	0.002764	0.046
14_94756794	rs941590	T	C	0.58	0.27	0.65	exonic	SERPINA10	nonsynonymous SNV	P-K+	PK	0.002929	0.02803
19_55396900	rs1865096	A	G	0.57	0.29	0.71	exonic	FCAR	synonymous SNV	P-K+	PK	0.002932	0.01824
2_197704054	rs73062982	T	C	0.17	0.03	0.31	UTR3	PGAP1	.	P-K+	PK	0.002979	0.0632
3_128292213	rs2734046	A	G	0.69	0.69	0.97	ncRNA_exonic	LINC01565	.	P-K+	PK	0.002979	0.07949
3_178742044	rs6804084	T	C	0.82	0.69	0.97	UTR3	ZMAT3	.	P-K+	PK	0.002979	0.05571
7_5347295	rs7794563	A	G	0.89	0.69	0.97	UTR3	TNRC18	.	P-K+	PK	0.002979	0.1113
3_195514324	rs78009073	G	A	0.3	0.29	0.71	exonic	MUC4	nonsynonymous SNV	P-K+	PK	0.003044	0.03863
19_55441902	rs269950	T	C	0.58	0.44	0.81	exonic	NLRP7	synonymous SNV	P-K+	PK	0.003124	0.08979
9_106856633	rs3818626	C	T	0.42	0.19	0.56	UTR5	SMC2	.	P-K+	PK	0.003124	0.09353
6_32609094	rs550717566	C	T	0.5	0.08	0.46	exonic	HLA-DQA1	synonymous SNV	P-K+	PK	0.003174	0.01342
10_104575870	rs6892	A	G	0.33	0.11	0.44	UTR3	WBP1L	.	P-K+	PK	0.003191	0.07907
11_33881016	rs3740617	T	C	0.72	0.56	0.89	exonic	LMO2	synonymous SNV	P-K+	PK	0.003191	0.09423
4_177135620	rs10003543	G	A	0.71	0.56	0.89	UTR3	ASB5	.	P-K+	PK	0.003191	0.03903
21_38117040	rs2073416	G	A	0.25	0.12	0.44	exonic	SIM2	synonymous SNV	P-K+	PK	0.003359	0.05152
3_28390351	rs1870259	A	G	0.17	0.12	0.44	UTR5	ZCWPW2	.	P-K+	PK	0.003359	0.03174
5_82349377	rs7891	A	G	0.17	0.12	0.44	UTR3	TMEM167A	.	P-K+	PK	0.003359	0.07949
11_47282024	rs2279238	C	T	0.25	0.06	0.36	exonic	NR1H3	synonymous SNV	P-K+	PK	0.003403	0.03457
19_4525046	rs1610090	A	G	0.69	0.5	0.91	exonic	PLIN5	nonsynonymous SNV	P-K+	PK	0.003636	0.01536
12_113348870	rs1131454	G	A	0.56	0.35	0.72	exonic	OAS1	nonsynonymous SNV	P-K+	PK	0.003657	0.03521
17_1641715	rs1310	G	T	0.5	0.24	0.58	UTR3	WDR81	.	P-K+	PK	0.003908	0.0561
19_58774071	rs260462	A	G	0.67	0.39	0.75	exonic	ZNF544	nonsynonymous SNV	P-K+	PK	0.003944	0.08497
6_24428903	rs793680	T	C	0.47	0.39	0.75	UTR3	GPLD1	.	P-K+	PK	0.003944	0.05851
14_93401316	rs7610	T	C	0.74	0.62	0.92	UTR3	CHGA	.	P-K+	PK	0.003991	0.03783
21_41137507	rs2205204	G	C	0.71	0.45	0.88	exonic	IGSF5	nonsynonymous SNV	P-K+	PK	0.004055	0.0152
5_180218820	rs2070925	C	A	0.13	0	0.23	exonic	MGAT1	synonymous SNV	P-K+	PK	0.00414	0.05079
15_34610964	rs347867	G	C	0.36	0.28	0.64	UTR5	SLC12A6	.	P-K+	PK	0.004198	0.05371
17_3649214	rs1183610	G	A	0.47	0.28	0.64	exonic	ITGAE	synonymous SNV	P-K+	PK	0.004198	0.05611
21_45181189	rs3194230	C	G	0.39	0.28	0.64	UTR3	PDXK	.	P-K+	PK	0.004198	0.05771
22_50280136	rs5770755	T	C	0.44	0.36	0.72	exonic	ZBED4	synonymous SNV	P-K+	PK	0.004198	0.05771
19_35420841	rs2546001	A	G	0.53	0.53	0.86	UTR5	ZNF30	.	P-K+	PK	0.00429	0.05054
3_42799765	rs17238798	G	A	0.36	0.14	0.47	exonic	CCDC13	nonsynonymous SNV	P-K+	PK	0.00429	0.05371
6_112672155	rs11153362	C	A	0.06	0.14	0.47	UTR3	RFPL4B	.	P-K+	PK	0.00429	0.07949
9_138586198	rs572335	G	A	0.94	0.78	1	exonic	SOHLH1	synonymous SNV	P-K+	PK	0.004322	0.05058
19_49527305	rs62126028	A	G	0.53	0.31	0.67	UTR5	CGB3	.	P-K+	PK	0.004328	0.05771
1_42050366	rs2146315	C	T	0.15	0.07	0.43	exonic	HIVEP3	nonsynonymous SNV	P-K+	PK	0.004337	0.02858
12_54496219	rs1133773	A	G	0.13	0	0.29	ncRNA_exonic	LOC100240734	.	P-K+	PK	0.004376	0.0208
16_18839362	rs12445870	T	C	0.2	0.1	0.46	exonic	SMG1	synonymous SNV	P-K+	PK	0.004439	0.03571
1_215740806	rs540761081	C	T	0.03	0	0.21	UTR5	KCTD3	.	P-K+	PK	0.004488	0.05414
4_130030652	rs337277	A	G	0.94	0.79	1	exonic	C4orf33	nonsynonymous SNV	P-K+	PK	0.004488	0.1065
9_124094800	rs9102	T	C	0.14	0	0.21	exonic	GSN	synonymous SNV	P-K+	PK	0.004488	0.05389
5_133916150	rs142844903	C	T	0.03	0	0.29	UTR3	JADE2	.	P-K+	PK	0.004489	0.02411
13_31891746	rs1041073	G	A	0.75	0.61	0.92	exonic	B3GLCT	nonsynonymous SNV	P-K+	PK	0.004555	0.055
2_121989489	rs2304667	G	A	0.39	0.08	0.39	exonic	TFCP2L1	synonymous SNV	P-K+	PK	0.004555	0.1187
6_31797587	rs539689	C	G	0.5	0.61	0.92	exonic	HSPA1B	synonymous SNV	P-K+	PK	0.004555	0.04661
1_41327873	rs12081504	G	C	0.5	0.41	0.85	UTR5	CITED4	.	P-K+	PK	0.004564	0.02437
19_14830749	rs11085909	G	A	0.68	0.57	0.92	UTR3	ZNF333	.	P-K+	PK	0.004576	0.02725
19_14829749	rs3764626	C	T	0.43	0.33	0.71	exonic	ZNF333	nonsynonymous SNV	P-K+	PK	0.004596	0.02268
3_178785549	rs6772028	G	A	0.81	0.77	1	UTR5	ZMAT3	.	P-K+	PK	0.004599	0.03634
22_21842655	rs455312	C	T	0.33	0.22	0.59	ncRNA_exonic	PI4KAP2	.	P-K+	PK	0.004662	0.02043
1_201377891	rs2296694	C	A	0.39	0.29	0.64	UTR3	TNNI1	.	P-K+	PK	0.004668	0.03022
12_106460158	rs6539249	A	G	0.67	0.5	0.83	UTR3	NUAK1	.	P-K+	PK	0.004726	0.04346
5_180219304	rs7726005	C	T	0.17	0.09	0.39	exonic	MGAT1	nonsynonymous SNV	P-K+	PK	0.004733	0.05152
3_150302822	rs1133494	A	C	0.86	0.66	0.94	UTR3	EIF2A	.	P-K+	PK	0.004836	0.05079
5_148206348	rs1042711	C	T	0.83	0.66	0.94	UTR5	ADRB2	.	P-K+	PK	0.004836	0.02214
1_184597999	rs8972	T	C	0.08	0	0.22	UTR3	C1orf21	.	P-K+	PK	0.005056	0.05389
1_238070459	rs2275450	C	A	0.12	0	0.22	ncRNA_exonic	LOC100130331	.	P-K+	PK	0.005056	0.1071
12_27118613	rs900743	C	A	0.92	0.78	1	UTR3	FGFR1OP2	.	P-K+	PK	0.005056	0.1065
3_122646828	rs2276774	A	G	0.11	0	0.22	exonic	SEMA5B	nonsynonymous SNV	P-K+	PK	0.005056	0.05527
3_16640075	rs11710967	T	C	0.06	0	0.22	exonic	DAZL	nonsynonymous SNV	P-K+	PK	0.005056	0.1145
5_149912527	rs2273232	C	T	0.08	0	0.22	exonic	NDST1	synonymous SNV	P-K+	PK	0.005056	0.1065
5_149932934	rs1045538	G	A	0.08	0	0.22	UTR3	NDST1	.	P-K+	PK	0.005056	0.1065
5_149933222	rs1045544	C	G	0.06	0	0.22	UTR3	NDST1	.	P-K+	PK	0.005056	0.08024
5_160721319	rs2229944	G	A	0.18	0	0.22	exonic	GABRB2	synonymous SNV	P-K+	PK	0.005056	0.02564
6_31601344	rs2272593	T	C	0.75	0.78	1	exonic	PRRC2A	nonsynonymous SNV	P-K+	PK	0.005056	0.1113
7_29519929	rs3750103	A	G	0.08	0	0.22	exonic	CHN2	nonsynonymous SNV	P-K+	PK	0.005056	0.05527
8_144777242	rs3204170	T	C	0.29	0.14	0.5	UTR3	ZNF707	.	P-K+	PK	0.00513	0.02263
10_135044009	rs11599284	G	A	0.2	0.03	0.3	exonic	UTF1	nonsynonymous SNV	P-K+	PK	0.005138	0.02464
19_4442999	rs243383	T	G	0.97	0.75	1	exonic	CHAF1A	nonsynonymous SNV	P-K+	PK	0.005326	0.0244
16_68732457	rs1886699	G	T	0.75	0.5	0.83	UTR3	CDH3	.	P-K+	PK	0.005381	0.06404
2_234394487	rs1048603	G	A	0.36	0.17	0.5	exonic	USP40	nonsynonymous SNV	P-K+	PK	0.005381	0.05054
2_48915871	rs11125179	A	G	0.56	0.5	0.83	exonic	LHCGR	synonymous SNV	P-K+	PK	0.005381	0.05611
2_48921375	rs2293275	T	C	0.53	0.5	0.83	exonic	LHCGR	nonsynonymous SNV	P-K+	PK	0.005381	0.08497
20_17600357	rs11960	G	A	0.58	0.5	0.83	exonic	RRBP1	nonsynonymous SNV	P-K+	PK	0.005381	0.08497
4_185747176	rs116375145	G	A	0.44	0.17	0.5	UTR5	ACSL1	.	P-K+	PK	0.005381	0.05611
4_53732586	rs8287	T	C	0.33	0.17	0.5	UTR3	RASL11B	.	P-K+	PK	0.005381	0.05371
9_106902422	rs10991117	C	T	0.31	0.17	0.5	UTR3	SMC2	.	P-K+	PK	0.005381	0.07208
5_140563754	rs17844656	T	G	0.04	0	0.24	exonic	PCDHB16	synonymous SNV	P-K+	PK	0.005424	0.01335
6_42946490	rs9462858	C	A	0.3	0.14	0.5	exonic	PEX6	synonymous SNV	P-K+	PK	0.00551	0.01485
20_60777171	rs2184156	C	T	0.66	0.19	0.53	ncRNA_UTR3	MTG2	.	P-K+	PK	0.00565	0.03521
19_55691600	rs3810353	C	G	0.3	0.13	0.47	UTR5	SYT5	.	P-K+	PK	0.005737	0.01686
10_129904917	rs1894410	G	A	0.19	0.06	0.33	exonic	MKI67	synonymous SNV	P-K+	PK	0.00586	0.07949
14_50575408	rs76988825	C	T	0.22	0.06	0.33	UTR3	VCPKMT	.	P-K+	PK	0.00586	0.1552
15_34525588	rs16958873	T	C	0.19	0.06	0.33	UTR3	SLC12A6	.	P-K+	PK	0.00586	0.0451
17_7491177	rs4227	G	T	0.89	0.67	0.94	UTR3	MPDU1	.	P-K+	PK	0.00586	0.0847
2_121976642	rs17794420	G	A	0.33	0.06	0.33	UTR3	TFCP2L1	.	P-K+	PK	0.00586	0.1552
2_234371351	rs2228939	G	A	0.22	0.06	0.33	exonic	DGKD	synonymous SNV	P-K+	PK	0.00586	0.0451
22_36622906	rs129607	T	C	0.69	0.67	0.94	UTR3	APOL2	.	P-K+	PK	0.00586	0.03457
5_7859434	rs1046014	T	C	0.12	0.06	0.33	UTR3	FASTKD3	.	P-K+	PK	0.00586	0.02259
3_195460582	rs2251332	C	T	0.21	0.08	0.45	downstream	MUC20	.	P-K+	PK	0.005868	0.02772
3_195460583	rs2251333	A	G	0.21	0.08	0.45	downstream	MUC20	.	P-K+	PK	0.005868	0.02772
17_33331575	rs1052536	C	T	0.33	0.03	0.31	UTR3	LIG3	.	P-K+	PK	0.005899	0.01693
16_30936081	rs35675346	G	A	0.79	0.45	0.85	exonic	FBXL19	nonsynonymous SNV	P-K+	PK	0.005976	0.01816
14_23467664	rs3829409	G	A	0.12	0	0.27	exonic	C14orf93	nonsynonymous SNV	P-K+	PK	0.00608	0.01374
3_38768300	rs57326399	T	C	0.17	0	0.21	exonic	SCN10A	nonsynonymous SNV	P-K+	PK	0.006128	0.02808
4_68586335	rs72643632	T	C	0.03	0	0.22	ncRNA_exonic	UBA6-AS1	.	P-K+	PK	0.006288	0.04913
4_68586336	rs17635292	A	G	0.03	0	0.22	ncRNA_exonic	UBA6-AS1	.	P-K+	PK	0.006288	0.04913
1_94374742	rs743119	C	A	0.07	0	0.25	UTR5	GCLM	.	P-K+	PK	0.006302	0.01635
16_72007399	rs9925415	C	T	0.31	0.22	0.56	exonic	PKD1L3	unknown	P-K+	PK	0.006341	0.04726
19_35418095	rs56330896	G	C	0.28	0.22	0.56	UTR5	ZNF30	.	P-K+	PK	0.006341	0.03009
13_111980537	rs1359428	C	T	0.83	0.47	0.81	exonic	TEX29	synonymous SNV	P-K+	PK	0.006403	0.07208
2_113258916	rs17846193	C	T	0.53	0.19	0.53	exonic	TTL	synonymous SNV	P-K+	PK	0.006403	0.08497
2_56611725	rs11902680	C	A	0.19	0.19	0.53	UTR3	CCDC85A	.	P-K+	PK	0.006403	0.07208
2_56612594	rs61099055	C	T	0.19	0.19	0.53	UTR3	CCDC85A	.	P-K+	PK	0.006403	0.07208
3_195515594	rs13095016	C	G	0.58	0.47	0.81	exonic	MUC4	nonsynonymous SNV	P-K+	PK	0.006403	0.08497
4_156617994	rs2306557	G	A	0.19	0.19	0.53	UTR5	GUCY1A1	.	P-K+	PK	0.006403	0.04198
12_101685852	rs11110737	G	A	0.11	0.03	0.28	exonic	UTP20	synonymous SNV	P-K+	PK	0.006453	0.0847
12_101693534	rs4764643	C	G	0.19	0.03	0.28	exonic	UTP20	nonsynonymous SNV	P-K+	PK	0.006453	0.0847
12_113448288	rs15895	A	G	0.92	0.72	0.97	exonic	OAS2	stoploss SNV	P-K+	PK	0.006453	0.0847
15_22413700	rs267612	A	G	0.89	0.72	0.97	ncRNA_exonic	OR4N3P	.	P-K+	PK	0.006453	0.1065
19_58011447	rs138317120	C	T	0.19	0.03	0.28	UTR5	ZNF773	.	P-K+	PK	0.006453	0.03457
2_197521750	rs34133636	G	A	0.14	0.03	0.28	exonic	CCDC150	nonsynonymous SNV	P-K+	PK	0.006453	0.0847
2_197662526	rs11559078	T	C	0.17	0.03	0.28	exonic	GTF3C3	nonsynonymous SNV	P-K+	PK	0.006453	0.0847
2_197698382	rs3820907	A	G	0.17	0.03	0.28	UTR3	PGAP1	.	P-K+	PK	0.006453	0.0847
2_197699029	rs57341501	T	A	0.17	0.03	0.28	UTR3	PGAP1	.	P-K+	PK	0.006453	0.0847
2_197699811	rs73062970	G	A	0.17	0.03	0.28	UTR3	PGAP1	.	P-K+	PK	0.006453	0.0847
2_197700070	rs73062971	C	T	0.17	0.03	0.28	UTR3	PGAP1	.	P-K+	PK	0.006453	0.0847
2_197700975	rs73062975	A	G	0.15	0.03	0.28	UTR3	PGAP1	.	P-K+	PK	0.006453	0.05943
2_197701704	rs7602892	A	G	0.17	0.03	0.28	UTR3	PGAP1	.	P-K+	PK	0.006453	0.0847
2_197703076	rs3795920	C	T	0.17	0.03	0.28	UTR3	PGAP1	.	P-K+	PK	0.006453	0.0847
2_197705753	rs59749746	C	G	0.19	0.03	0.28	UTR3	PGAP1	.	P-K+	PK	0.006453	0.0632
6_10887147	rs16870749	G	C	0.06	0.03	0.28	upstream	SYCP2L	.	P-K+	PK	0.006453	0.0847
10_75562161	rs13013	C	A	0.28	0.11	0.42	UTR3	NDST2	.	P-K+	PK	0.006554	0.055
16_84940479	rs1874008	T	C	0.64	0.58	0.89	UTR3	CRISPLD2	.	P-K+	PK	0.006554	0.1187
18_649759	rs1058151	T	C	0.33	0.11	0.42	UTR3	TYMSOS	.	P-K+	PK	0.006554	0.1187
4_177136512	rs922849	G	A	0.69	0.58	0.89	UTR3	ASB5	.	P-K+	PK	0.006554	0.07208
5_21491446	rs371964320	G	T	0.33	0.11	0.42	ncRNA_exonic	GUSBP1	.	P-K+	PK	0.006554	0.1877
6_168364149	rs3734882	A	G	0.22	0.11	0.42	UTR3	AFDN	.	P-K+	PK	0.006554	0.09423
6_24588884	rs4504469	C	T	0.22	0.11	0.42	exonic	KIAA0319	nonsynonymous SNV	P-K+	PK	0.006554	0.06404
20_61288355	rs3195701	G	T	0.18	0	0.25	exonic	SLCO4A1	synonymous SNV	P-K+	PK	0.006611	0.0104
6_35479574	rs7764472	G	C	0.6	0.67	1	exonic	TULP1	nonsynonymous SNV	P-K+	PK	0.006724	0.008206
16_55364459	rs2008953	G	A	0.36	0.21	0.53	UTR3	IRX6	.	P-K+	PK	0.006838	0.034
4_7779845	rs67725344	C	T	0.21	0.06	0.33	ncRNA_exonic	AFAP1-AS1	.	P-K+	PK	0.006928	0.04521
19_57731443	rs13345715	G	A	0.33	0.04	0.31	UTR3	ZNF264	.	P-K+	PK	0.006935	0.01776
13_19586168	rs9511061	G	A	0.74	0.41	0.75	ncRNA_exonic	LINC00442	.	P-K+	PK	0.007144	0.04319
12_132325239	rs6598163	G	A	0.36	0.22	0.56	exonic	MMP17	nonsynonymous SNV	P-K+	PK	0.007305	0.07907
12_63040272	rs1391692	T	C	0.58	0.44	0.78	UTR3	PPM1H	.	P-K+	PK	0.007305	0.05371
16_4164364	rs2230738	C	T	0.39	0.44	0.78	exonic	ADCY9	synonymous SNV	P-K+	PK	0.007305	0.05611
17_71281352	rs3751928	A	G	0.69	0.44	0.78	UTR3	CDC42EP4	.	P-K+	PK	0.007305	0.1285
9_106856691	rs10820599	T	G	0.42	0.22	0.56	UTR5	SMC2	.	P-K+	PK	0.007305	0.08979
9_106856692	rs10820600	T	C	0.42	0.22	0.56	UTR5	SMC2	.	P-K+	PK	0.007305	0.08979
3_195514379	rs79461778	T	C	0.25	0.25	0.62	exonic	MUC4	nonsynonymous SNV	P-K+	PK	0.007366	0.02918
3_195514393	rs12491056	A	G	0.25	0.25	0.62	exonic	MUC4	nonsynonymous SNV	P-K+	PK	0.007366	0.02918
3_195514403	rs79754259	C	T	0.25	0.25	0.62	exonic	MUC4	nonsynonymous SNV	P-K+	PK	0.007366	0.02918
3_195514407	rs80139068	G	A	0.25	0.25	0.62	exonic	MUC4	synonymous SNV	P-K+	PK	0.007366	0.02918
3_195505664	rs2688513	G	A	0.45	0.27	0.64	exonic	MUC4	nonsynonymous SNV	P-K+	PK	0.007466	0.02408
22_27067643	rs73163299	A	G	0.23	0	0.39	ncRNA_exonic	MIAT	.	P-K+	PK	0.007625	0.01401
4_7775696	rs9996019	A	G	0.67	0.61	1	ncRNA_exonic	AFAP1-AS1	.	P-K+	PK	0.007625	0.01492
8_144344456	rs1056449	T	C	0	0.27	0.75	UTR3	ZFP41	.	P-K+	PK	0.007634	0.01353
13_19586194	rs9507244	C	A	0.69	0.38	0.72	ncRNA_exonic	LINC00442	.	P-K+	PK	0.007646	0.0329
5_112181379	rs448475	C	G	0.69	0.38	0.72	UTR3	APC	.	P-K+	PK	0.007646	0.05258
6_118636902	rs283048	G	A	0.4	0.18	0.63	UTR3	SLC35F1	.	P-K+	PK	0.007655	0.01582
11_556857	rs7938269	G	C	0.85	0.71	0.97	exonic	LMNTD2	synonymous SNV	P-K+	PK	0.007732	0.04137
6_53519857	rs12210809	G	A	0.61	0.44	0.76	exonic	KLHL31	synonymous SNV	P-K+	PK	0.00785	0.05258
16_30034986	rs79063905	G	A	0.1	0	0.2	exonic	C16orf92	synonymous SNV	P-K+	PK	0.00792	0.0244
1_22444975	rs10737462	C	T	0.25	0.25	0.58	UTR3	WNT4	.	P-K+	PK	0.008046	0.07907
19_43702342	rs9789333	C	T	0.58	0.42	0.75	exonic	PSG4	synonymous SNV	P-K+	PK	0.008046	0.05371
3_33194990	rs6810039	C	A	0.59	0.42	0.75	exonic	SUSD5	nonsynonymous SNV	P-K+	PK	0.008046	0.03408
16_1270162	rs1054645	G	A	0.56	0.32	0.67	exonic	CACNA1H	nonsynonymous SNV	P-K+	PK	0.00806	0.0329
3_122645277	rs2276777	C	T	0.06	0	0.19	exonic	SEMA5B	synonymous SNV	P-K+	PK	0.008279	0.02457
3_182896898	rs620722	A	G	0.79	0.65	0.92	UTR3	MCF2L2	.	P-K+	PK	0.008292	0.05079
7_5862974	rs7806927	T	C	0.88	0.65	0.92	ncRNA_exonic	ZNF815P	.	P-K+	PK	0.008292	0.05757
19_33696897	rs11084712	C	T	0.23	0.08	0.38	exonic	LRP3	synonymous SNV	P-K+	PK	0.008515	0.02533
16_72020134	rs12708923	T	C	0.36	0.28	0.61	exonic	PKD1L3	unknown	P-K+	PK	0.008596	0.09353
17_42453065	rs5911	A	C	0.31	0.28	0.61	exonic	ITGA2B	nonsynonymous SNV	P-K+	PK	0.008596	0.08979
17_4936898	rs2304445	C	T	0.61	0.28	0.61	exonic	SLC52A1	nonsynonymous SNV	P-K+	PK	0.008596	0.09779
17_4997433	rs12600437	G	A	0.58	0.28	0.61	UTR3	ZFP3	.	P-K+	PK	0.008596	0.09832
17_5032545	rs1122313	C	T	0.56	0.28	0.61	UTR5	USP6	.	P-K+	PK	0.008596	0.09832
17_5085857	rs1730488	C	T	0.56	0.28	0.61	exonic	ZNF594	synonymous SNV	P-K+	PK	0.008596	0.09832
19_53611187	rs3814	T	C	0.5	0.28	0.61	UTR3	ZNF415	.	P-K+	PK	0.008596	0.05611
21_45177719	rs77753871	G	A	0.44	0.28	0.61	UTR3	PDXK	.	P-K+	PK	0.008596	0.09353
4_185678110	rs2292899	A	G	0.53	0.28	0.61	UTR3	ACSL1	.	P-K+	PK	0.008596	0.05771
5_96254209	rs1230381	A	G	0.5	0.39	0.72	UTR3	ERAP2	.	P-K+	PK	0.008596	0.05771
5_96271638	rs2617434	A	G	0.5	0.39	0.72	upstream	LNPEP	.	P-K+	PK	0.008596	0.05771
16_18937508	rs12929094	G	A	0.36	0.14	0.44	UTR5	SMG1	.	P-K+	PK	0.008624	0.1187
17_2266799	rs745400	G	A	0.83	0.56	0.86	exonic	SGSM2	nonsynonymous SNV	P-K+	PK	0.008624	0.07949
17_2266812	rs2003968	T	C	0.83	0.56	0.86	exonic	SGSM2	synonymous SNV	P-K+	PK	0.008624	0.07949
17_2268311	rs2248821	G	A	0.83	0.56	0.86	exonic	SGSM2	nonsynonymous SNV	P-K+	PK	0.008624	0.07949
17_78854223	rs2289759	A	G	0.19	0.14	0.44	exonic	RPTOR	synonymous SNV	P-K+	PK	0.008624	0.06404
22_43619200	rs6003114	G	A	0.36	0.14	0.44	exonic	SCUBE1	synonymous SNV	P-K+	PK	0.008624	0.07208
3_195451880	rs142096782	A	G	0.67	0.56	0.86	exonic	MUC20	nonsynonymous SNV	P-K+	PK	0.008624	0.1368
3_195497174	rs2259102	C	G	0.61	0.56	0.86	exonic	MUC4	nonsynonymous SNV	P-K+	PK	0.008624	0.1187
6_168371755	rs1044292	G	A	0.28	0.14	0.44	UTR3	AFDN	.	P-K+	PK	0.008624	0.1073
10_32345138	rs211300	A	G	0.08	0	0.31	UTR5	KIF5B	.	P-K+	PK	0.008702	0.0447
16_81819768	rs1143685	T	C	0.69	0.62	0.91	exonic	PLCG2	synonymous SNV	P-K+	PK	0.008709	0.05152
1_2978043	rs2075969	G	C	0.33	0.36	0.69	ncRNA_exonic	PRDM16-DT	.	P-K+	PK	0.008935	0.05851
1_34038214	rs2641962	T	C	0.61	0.36	0.69	exonic	CSMD2	nonsynonymous SNV	P-K+	PK	0.008935	0.09619
17_7474992	rs10468481	G	A	0.31	0.31	0.64	ncRNA_UTR3	SENP3	.	P-K+	PK	0.008935	0.08497
17_80350331	rs11903	G	A	0.61	0.36	0.69	exonic	OGFOD3	synonymous SNV	P-K+	PK	0.008935	0.05771
19_45324516	rs7026	C	T	0.22	0.31	0.64	UTR3	BCAM	.	P-K+	PK	0.008935	0.05054
19_49527552	rs200207020	C	T	0.53	0.31	0.64	UTR5	CGB3	.	P-K+	PK	0.008935	0.05851
19_49527556	rs201091434	G	A	0.53	0.31	0.64	UTR5	CGB3	.	P-K+	PK	0.008935	0.05851
3_130064807	rs6797052	T	C	0.75	0.36	0.69	UTR5	COL6A5	.	P-K+	PK	0.008935	0.05371
6_168364853	rs1417	T	A	0.22	0.15	0.44	UTR3	AFDN	.	P-K+	PK	0.00902	0.09573
13_28121862	rs6491216	A	G	0.2	0.08	0.5	UTR3	LNX2	.	P-K+	PK	0.009072	0.01274
17_26722645	rs8079943	G	A	0.25	0.13	0.5	UTR3	SLC46A1	.	P-K+	PK	0.009245	0.01737
11_47306585	rs1051006	G	A	0.28	0.08	0.36	exonic	MADD	nonsynonymous SNV	P-K+	PK	0.009279	0.0451
19_7747445	rs1053363	G	A	0.31	0.08	0.36	exonic	TRAPPC5	synonymous SNV	P-K+	PK	0.009279	0.07949
20_37001761	rs2232618	T	C	0.19	0.08	0.36	exonic	LBP	nonsynonymous SNV	P-K+	PK	0.009279	0.0632
22_44324727	rs738409	C	G	0.28	0.08	0.36	exonic	PNPLA3	nonsynonymous SNV	P-K+	PK	0.009279	0.09423
22_44324730	rs738408	C	T	0.28	0.08	0.36	exonic	PNPLA3	synonymous SNV	P-K+	PK	0.009279	0.09423
4_7764821	rs2107182	C	T	0.83	0.64	0.92	ncRNA_UTR3	AFAP1	.	P-K+	PK	0.009279	0.09423
4_8009737	rs16841552	C	T	0.14	0.08	0.36	UTR3	ABLIM2	.	P-K+	PK	0.009279	0.0451
7_43483981	rs61756574	G	C	0.17	0.08	0.36	exonic	HECW1	nonsynonymous SNV	P-K+	PK	0.009279	0.07949
19_13249244	rs8112067	A	G	0.53	0.39	0.71	UTR3	NACC1	.	P-K+	PK	0.009376	0.03038
19_50569560	rs12462384	C	T	0.33	0.04	0.33	ncRNA_exonic	LOC400710	.	P-K+	PK	0.009401	0.01446
5_16664769	rs26742	G	A	0.5	0.61	0.93	UTR3	MYO10	.	P-K+	PK	0.009531	0.0198
22_50357416	rs13811	C	T	0.2	0.14	0.57	UTR3	PIM3	.	P-K+	PK	0.009679	0.01458
1_248084434	rs11204563	G	A	0.5	0.32	0.64	exonic	OR2T8	nonsynonymous SNV	P-K+	PK	0.009835	0.09779
1_248085108	rs4625315	C	T	0.28	0.28	0.63	exonic	OR2T8	synonymous SNV	P-K+	PK	0.01009	0.02256
5_140605601	rs73275709	A	G	0.06	0.03	0.25	UTR3	PCDHB14	.	P-K+	PK	0.01016	0.05184
21_47811272	rs3737438	C	T	0.03	0	0.25	exonic	PCNT	synonymous SNV	P-K+	PK	0.01021	0.06209
1_153520954	rs36022742	C	T	0.06	0	0.18	exonic	S100A3	nonsynonymous SNV	P-K+	PK	0.01026	0.05571
6_42110589	rs6932184	A	G	0.89	0.82	1	upstream	C6orf132	.	P-K+	PK	0.01026	0.1065
20_56098733	rs6025606	T	C	0.56	0.25	0.75	exonic	CTCFL	nonsynonymous SNV	P-K+	PK	0.01031	0.01526
1_18807938	rs2992754	C	A	0.14	0	0.25	exonic	KLHDC7A	nonsynonymous SNV	P-K+	PK	0.0104	0.03206
8_35583692	rs6983275	T	C	0.13	0	0.25	exonic	UNC5D	synonymous SNV	P-K+	PK	0.0104	0.01911
20_44578961	rs3746503	A	G	0.08	0.07	0.37	exonic	ZNF335	synonymous SNV	P-K+	PK	0.01061	0.02104
2_239016539	rs935415	C	G	0.75	0.53	0.83	exonic	ESPNL	synonymous SNV	P-K+	PK	0.01065	0.07208
20_60713311	rs7076	G	A	0.64	0.53	0.83	exonic	PSMA7	synonymous SNV	P-K+	PK	0.01065	0.07208
3_44754177	rs6771160	C	G	0.69	0.53	0.83	UTR5	ZNF502	.	P-K+	PK	0.01065	0.07907
3_44763037	rs7640654	A	C	0.67	0.53	0.83	exonic	ZNF502	nonsynonymous SNV	P-K+	PK	0.01065	0.07907
5_137782204	rs3798153	A	C	0.62	0.53	0.83	UTR3	REEP2	.	P-K+	PK	0.01065	0.02755
5_82350191	rs27493	G	A	0.19	0.17	0.47	UTR3	TMEM167A	.	P-K+	PK	0.01065	0.1073
6_168315978	rs3213590	G	C	0.22	0.17	0.47	exonic	AFDN	synonymous SNV	P-K+	PK	0.01065	0.1073
6_168317816	rs6906754	A	C	0.22	0.17	0.47	exonic	AFDN	synonymous SNV	P-K+	PK	0.01065	0.1073
6_90315771	rs16881983	C	G	0.31	0.17	0.47	exonic	ANKRD6	nonsynonymous SNV	P-K+	PK	0.01065	0.1187
6_26376832	rs13218591	T	C	0.13	0	0.23	UTR3	BTN3A2	.	P-K+	PK	0.01071	0.02013
15_79586361	rs8038778	T	C	0.53	0.33	0.73	exonic	ANKRD34C	synonymous SNV	P-K+	PK	0.01075	0.02439
11_320772	rs12252	A	G	0.18	0.06	0.29	exonic	IFITM3	synonymous SNV	P-K+	PK	0.01082	0.03859
2_131131424	rs3739123	G	C	0.14	0	0.29	UTR3	PTPN18	.	P-K+	PK	0.01095	0.02161
22_44602229	rs139186	A	C	0.54	0.43	0.79	exonic	PARVG	synonymous SNV	P-K+	PK	0.01105	0.02125
20_2375262	rs2076405	A	G	0.88	0.79	1	exonic	TGM6	nonsynonymous SNV	P-K+	PK	0.0111	0.07855
5_180218831	rs2070924	G	A	0.11	0	0.21	exonic	MGAT1	synonymous SNV	P-K+	PK	0.0111	0.05184
9_132397239	rs3088095	T	C	0.03	0	0.21	UTR3	ASB6	.	P-K+	PK	0.0111	0.1084
6_15496662	rs742099	C	T	0.12	0.09	0.36	exonic	JARID2	synonymous SNV	P-K+	PK	0.01111	0.02528
3_75786832	rs11122676	C	T	0.27	0.18	0.54	exonic	ZNF717	nonsynonymous SNV	P-K+	PK	0.01115	0.04262
8_143808628	rs2280877	G	T	0.03	0.03	0.27	upstream	LNCOC1,THEM6	.	P-K+	PK	0.01132	0.02586
1_162824553	rs78851184	G	A	0.11	0	0.19	UTR3	CCDC190	.	P-K+	PK	0.01133	0.05527
1_162825457	rs77227460	C	A	0.11	0	0.19	exonic	CCDC190	nonsynonymous SNV	P-K+	PK	0.01133	0.05527
1_184597866	rs12652	T	C	0.08	0	0.19	UTR3	C1orf21	.	P-K+	PK	0.01133	0.05389
1_20977674	rs16824318	A	C	0.11	0	0.19	ncRNA_exonic	PINK1-AS	.	P-K+	PK	0.01133	0.05527
1_228335125	rs1803695	C	T	0	0	0.19	exonic	GUK1	synonymous SNV	P-K+	PK	0.01133	0.1145
11_113669644	rs2285392	G	A	0.06	0	0.19	UTR3	USP28	.	P-K+	PK	0.01133	0.1065
11_113698002	rs17802314	C	T	0.06	0	0.19	exonic	USP28	synonymous SNV	P-K+	PK	0.01133	0.1065
11_86661981	rs3740661	T	C	0.08	0	0.19	UTR3	FZD4	.	P-K+	PK	0.01133	0.1065
15_23891503	rs2233063	C	G	0.03	0	0.19	exonic	MAGEL2	nonsynonymous SNV	P-K+	PK	0.01133	0.05389
15_63449736	rs28366055	G	A	0.08	0	0.19	upstream	RPS27L	.	P-K+	PK	0.01133	0.05527
16_3339435	rs220379	G	C	0	0	0.19	exonic	ZNF263	nonsynonymous SNV	P-K+	PK	0.01133	0.1145
18_29056862	rs112711163	C	G	0.06	0	0.19	UTR3	DSG3	.	P-K+	PK	0.01133	0.05805
19_14038791	rs2305777	C	T	0.31	0	0.19	exonic	CC2D1A	nonsynonymous SNV	P-K+	PK	0.01133	0.1113
2_190445194	rs11568351	G	C	0.17	0	0.19	UTR5	SLC40A1	.	P-K+	PK	0.01133	0.1065
2_190445284	rs13008848	C	G	0.17	0	0.19	UTR5	SLC40A1	.	P-K+	PK	0.01133	0.1065
2_73651967	rs3813227	C	T	0.14	0	0.19	exonic	ALMS1	nonsynonymous SNV	P-K+	PK	0.01133	0.1065
2_73677833	rs6546836	A	G	0.14	0	0.19	exonic	ALMS1	synonymous SNV	P-K+	PK	0.01133	0.1065
2_73677898	rs6546837	G	C	0.14	0	0.19	exonic	ALMS1	nonsynonymous SNV	P-K+	PK	0.01133	0.1065
2_73679280	rs6546838	A	G	0.14	0	0.19	exonic	ALMS1	nonsynonymous SNV	P-K+	PK	0.01133	0.1065
2_73679990	rs6724782	T	A	0.14	0	0.19	exonic	ALMS1	nonsynonymous SNV	P-K+	PK	0.01133	0.1065
2_73680508	rs6546839	G	C	0.14	0	0.19	exonic	ALMS1	nonsynonymous SNV	P-K+	PK	0.01133	0.1065
2_73717567	rs2056486	G	T	0.11	0	0.19	exonic	ALMS1	nonsynonymous SNV	P-K+	PK	0.01133	0.1065
2_73717656	rs10193972	A	G	0.11	0	0.19	exonic	ALMS1	nonsynonymous SNV	P-K+	PK	0.01133	0.1065
2_73829372	rs1052162	C	T	0.14	0	0.19	exonic	ALMS1	synonymous SNV	P-K+	PK	0.01133	0.1065
20_31396152	rs6058896	C	T	0.11	0	0.19	UTR3	DNMT3B	.	P-K+	PK	0.01133	0.05389
20_3650205	rs2280090	G	A	0.06	0	0.19	exonic	ADAM33	nonsynonymous SNV	P-K+	PK	0.01133	0.1145
20_61472808	rs1046784	G	C	0.03	0	0.19	UTR3	TCFL5	.	P-K+	PK	0.01133	0.1065
20_62200860	rs1757752	A	G	0.81	0.81	1	exonic	HELZ2	synonymous SNV	P-K+	PK	0.01133	0.1514
20_62293272	rs3848668	A	G	0.08	0	0.19	exonic	RTEL1	nonsynonymous SNV	P-K+	PK	0.01133	0.1145
20_62297400	rs73920935	T	C	0.08	0	0.19	exonic	RTEL1	synonymous SNV	P-K+	PK	0.01133	0.1145
22_19431038	rs712979	A	G	0.94	0.81	1	UTR3	C22orf39	.	P-K+	PK	0.01133	0.1514
22_19431396	rs756649	T	C	0.94	0.81	1	UTR3	C22orf39	.	P-K+	PK	0.01133	0.1514
22_39261135	rs2235140	C	G	0.89	0.81	1	UTR3	CBX6	.	P-K+	PK	0.01133	0.1065
3_122645304	rs2276776	G	A	0.03	0	0.19	exonic	SEMA5B	synonymous SNV	P-K+	PK	0.01133	0.05389
3_57431945	rs62622492	T	C	0.09	0	0.19	exonic	DNAH12	unknown	P-K+	PK	0.01133	0.08024
5_122950911	rs1059259	G	A	0.94	0.81	1	UTR3	CSNK1G3	.	P-K+	PK	0.01133	0.1065
5_160719244	rs12523641	G	A	0.17	0	0.19	UTR3	GABRB2	.	P-K+	PK	0.01133	0.02781
5_21497180	rs111734560	G	A	0.06	0	0.19	ncRNA_exonic	GUSBP1	.	P-K+	PK	0.01133	0.1145
5_21497187	rs10447150	C	T	0.06	0	0.19	ncRNA_exonic	GUSBP1	.	P-K+	PK	0.01133	0.1145
6_31595882	rs1046080	C	A	0.75	0.81	1	exonic	PRRC2A	nonsynonymous SNV	P-K+	PK	0.01133	0.1514
6_31627523	rs3130617	C	T	0.75	0.81	1	exonic	C6orf47	nonsynonymous SNV	P-K+	PK	0.01133	0.1514
6_31657413	rs1475865	T	C	0.75	0.81	1	exonic	ABHD16A	synonymous SNV	P-K+	PK	0.01133	0.1514
1_228364558	rs4653914	A	T	0.06	0	0.19	UTR3	IBA57	.	P-K+	PK	0.01145	0.1065
19_18385214	rs1079166	T	C	0.08	0	0.19	UTR5	IQCN	.	P-K+	PK	0.01145	0.05571
11_124294377	rs4057750	A	G	0.25	0.11	0.38	exonic	OR8B4	nonsynonymous SNV	P-K+	PK	0.01167	0.05152
7_111367623	rs3801790	T	C	0.61	0.62	0.89	UTR3	DOCK4	.	P-K+	PK	0.01167	0.05619
11_554166	rs10902170	C	G	0.81	0.43	0.79	exonic	LRRC56	nonsynonymous SNV	P-K+	PK	0.01189	0.01603
5_112214093	rs2546115	C	T	0.36	0.19	0.54	UTR3	REEP5	.	P-K+	PK	0.012	0.03172
1_174979635	rs41266072	C	T	0.11	0.06	0.31	UTR3	CACYBP	.	P-K+	PK	0.01201	0.1113
1_174983207	rs16847706	T	G	0.11	0.06	0.31	UTR3	MRPS14	.	P-K+	PK	0.01201	0.1113
10_5781628	rs2254067	T	G	0.75	0.69	0.94	exonic	TASOR2	nonsynonymous SNV	P-K+	PK	0.01201	0.0451
11_72939052	rs565154472	T	G	0	0.06	0.31	UTR5	P2RY2	.	P-K+	PK	0.01201	0.1065
12_53294381	rs8608	T	C	0.67	0.69	0.94	exonic	KRT8	synonymous SNV	P-K+	PK	0.01201	0.09423
12_53400178	rs10876394	C	T	0.86	0.69	0.94	upstream	EIF4B	.	P-K+	PK	0.01201	0.0847
12_53433486	rs8916	C	T	0.86	0.69	0.94	exonic	EIF4B	synonymous SNV	P-K+	PK	0.01201	0.0847
12_53434913	rs1052028	A	G	0.83	0.69	0.94	UTR3	EIF4B	.	P-K+	PK	0.01201	0.0632
12_53434995	rs1961466	C	G	0.86	0.69	0.94	UTR3	EIF4B	.	P-K+	PK	0.01201	0.0847
14_50583083	rs11157729	G	T	0.22	0.06	0.31	exonic	VCPKMT	nonsynonymous SNV	P-K+	PK	0.01201	0.1552
14_50585248	rs2227276	C	T	0.21	0.06	0.31	exonic	SOS2	synonymous SNV	P-K+	PK	0.01201	0.1062
15_34629870	rs79294885	C	A	0.17	0.06	0.31	UTR5	SLC12A6	.	P-K+	PK	0.01201	0.0847
20_61919481	rs13865	C	T	0	0.06	0.31	UTR3	ARFGAP1	.	P-K+	PK	0.01201	0.05389
21_15600600	rs2822451	T	C	0.17	0.06	0.31	UTR3	RBM11	.	P-K+	PK	0.01201	0.0457
4_41746477	rs62412180	T	C	0.17	0.06	0.31	UTR3	PHOX2B	.	P-K+	PK	0.01201	0.0451
5_148206473	rs1042714	G	C	0.81	0.69	0.94	exonic	ADRB2	nonsynonymous SNV	P-K+	PK	0.01201	0.0451
5_180229950	rs62407768	C	G	0.19	0.06	0.31	intronic	MGAT1	.	P-K+	PK	0.01201	0.0632
5_180229964	rs72549454	C	G	0.19	0.06	0.31	intronic	MGAT1	.	P-K+	PK	0.01201	0.0632
5_180229966	rs62407769	G	A	0.19	0.06	0.31	intronic	MGAT1	.	P-K+	PK	0.01201	0.0632
5_180230642	rs3806865	C	G	0.21	0.06	0.31	UTR5	MGAT1	.	P-K+	PK	0.01201	0.04263
5_180230661	rs3806866	G	A	0.19	0.06	0.31	UTR5	MGAT1	.	P-K+	PK	0.01201	0.0632
5_180277343	rs149387085	T	C	0.06	0.06	0.31	exonic	ZFP62	synonymous SNV	P-K+	PK	0.01201	0.0457
18_72264639	rs28476707	C	T	0.13	0	0.19	ncRNA_exonic	LINC00909	.	P-K+	PK	0.01208	0.02753
2_120005569	rs17805141	C	T	0.14	0	0.19	exonic	STEAP3	synonymous SNV	P-K+	PK	0.01208	0.08024
17_79091353	rs1801833	T	C	0.83	0.59	0.88	UTR3	AATK	.	P-K+	PK	0.01209	0.02259
6_32629809	rs701564	C	T	0.34	0.12	0.41	exonic	HLA-DQB1	nonsynonymous SNV	P-K+	PK	0.01209	0.0269
2_168107491	rs3749004	A	G	0.14	0.06	0.31	exonic	XIRP2	nonsynonymous SNV	P-K+	PK	0.01228	0.06405
8_28909523	rs10088428	C	T	0.22	0.06	0.31	UTR3	HMBOX1	.	P-K+	PK	0.01228	0.1022
1_54065778	rs12723437	C	T	0.94	0.76	0.97	exonic	GLIS1	nonsynonymous SNV	P-K+	PK	0.0123	0.08024
19_51835549	rs35525343	G	A	0.06	0.03	0.24	UTR3	VSIG10L	.	P-K+	PK	0.0123	0.02781
6_74497152	rs5023688	G	A	0.21	0	0.23	exonic	CD109	nonsynonymous SNV	P-K+	PK	0.01243	0.05111
16_1591962	rs2076443	G	A	0.31	0.04	0.3	exonic	TMEM204	synonymous SNV	P-K+	PK	0.01248	0.04036
10_66586305	rs1227236	A	G	0.5	0.5	0.81	ncRNA_exonic	ANXA2P3	.	P-K+	PK	0.01253	0.08979
15_68499661	rs8142	G	A	0.19	0.19	0.5	UTR3	CLN6	.	P-K+	PK	0.01253	0.06404
17_38645125	rs3764424	A	G	0.53	0.19	0.5	exonic	TNS4	nonsynonymous SNV	P-K+	PK	0.01253	0.05026
18_9959493	rs3069	A	G	0.47	0.19	0.5	UTR3	VAPA	.	P-K+	PK	0.01253	0.04661
22_45608347	rs12485064	G	A	0.61	0.5	0.81	UTR5	KIAA0930	.	P-K+	PK	0.01253	0.05371
3_133167363	rs2276737	G	A	0.67	0.5	0.81	exonic	BFSP2	synonymous SNV	P-K+	PK	0.01253	0.1285
5_141367898	rs433623	G	A	0.75	0.5	0.81	UTR3	RNF14	.	P-K+	PK	0.01253	0.06404
7_128315882	rs17169357	C	A	0.22	0.19	0.5	exonic	FAM71F2	nonsynonymous SNV	P-K+	PK	0.01253	0.06404
9_100105782	rs2061634	C	G	0.25	0.19	0.5	exonic	CCDC180	nonsynonymous SNV	P-K+	PK	0.01253	0.04198
9_4860569	rs1260073	G	A	0.39	0.19	0.5	UTR3	RCL1	.	P-K+	PK	0.01253	0.07907
14_93401178	rs941581	A	G	0.75	0.59	0.88	exonic	CHGA	synonymous SNV	P-K+	PK	0.01256	0.01736
11_2718977	rs10832548	C	T	0.21	0.16	0.47	ncRNA_exonic	KCNQ1OT1	.	P-K+	PK	0.01258	0.02445
1_159897126	rs13052	C	T	0.72	0.47	0.78	UTR3	IGSF9	.	P-K+	PK	0.01281	0.04722
19_35450229	rs2651079	C	T	0.42	0.47	0.78	exonic	ZNF792	nonsynonymous SNV	P-K+	PK	0.01281	0.03408
4_6303955	rs1046314	G	A	0.53	0.44	0.75	exonic	WFS1	synonymous SNV	P-K+	PK	0.01286	0.02739
14_21051304	rs1652047	T	C	0.64	0.61	0.89	UTR3	RNASE11	.	P-K+	PK	0.01295	0.055
16_18816600	rs8560	A	G	0.33	0.11	0.39	UTR3	SMG1	.	P-K+	PK	0.01295	0.09423
2_234380666	rs2026	C	T	0.31	0.11	0.39	UTR3	DGKD	.	P-K+	PK	0.01295	0.0451
22_31318341	rs9609157	C	T	0.25	0.11	0.39	ncRNA_exonic	MORC2-AS1	.	P-K+	PK	0.01295	0.055
3_42728144	rs6805421	A	G	0.72	0.61	0.89	exonic	KLHL40	nonsynonymous SNV	P-K+	PK	0.01295	0.1187
4_8602798	rs2241069	G	C	0.58	0.61	0.89	UTR5	CPZ	.	P-K+	PK	0.01295	0.04661
5_101724448	rs10055840	G	C	0.11	0.11	0.39	exonic	SLCO6A1	nonsynonymous SNV	P-K+	PK	0.01295	0.07949
6_410493	rs1877175	A	G	0.75	0.61	0.89	UTR3	IRF4	.	P-K+	PK	0.01295	0.09423
6_410513	rs1877176	A	G	0.75	0.61	0.89	UTR3	IRF4	.	P-K+	PK	0.01295	0.09423
6_411437	rs2316516	T	G	0.75	0.61	0.89	UTR3	IRF4	.	P-K+	PK	0.01295	0.07949
6_42666020	rs361524	G	A	0.31	0.07	0.35	UTR3	PRPH2	.	P-K+	PK	0.01312	0.03123
1_176830978	rs6425397	C	T	0.92	0.74	0.97	UTR3	ASTN1	.	P-K+	PK	0.01317	0.0544
5_1599909	rs2937014	T	A	0.09	0.03	0.26	ncRNA_exonic	LOC728613	.	P-K+	PK	0.01317	0.0544
7_158524204	rs57033874	G	A	0.17	0.03	0.26	UTR3	ESYT2	.	P-K+	PK	0.01317	0.04626
22_42777866	rs10854752	T	C	0.21	0.2	0.54	UTR3	NFAM1	.	P-K+	PK	0.01324	0.0391
4_68586315	rs13124793	G	A	0.03	0	0.19	ncRNA_exonic	UBA6-AS1	.	P-K+	PK	0.01333	0.05752
9_19786217	rs1536517	G	A	0	0	0.19	exonic	SLC24A2	synonymous SNV	P-K+	PK	0.01333	0.1132
22_20762423	rs12628313	C	A	0.13	0	0.21	UTR3	ZNF74	.	P-K+	PK	0.01335	0.02797
12_94963456	rs17022770	G	A	0.08	0.12	0.39	UTR3	TMCC3	.	P-K+	PK	0.01339	0.046
19_12772090	rs1133330	C	T	0	0.03	0.26	exonic	MAN2B1	nonsynonymous SNV	P-K+	PK	0.0134	0.05079
7_139878329	rs4726674	C	T	0.21	0.03	0.26	ncRNA_exonic	KDM7A-DT	.	P-K+	PK	0.0134	0.02648
19_55329854	rs144994606	G	A	0.11	0	0.23	exonic	KIR3DL1	nonsynonymous SNV	P-K+	PK	0.01345	0.01649
16_20870882	rs113864168	C	A	0.1	0.13	0.46	UTR3	DCUN1D3	.	P-K+	PK	0.01355	0.07177
12_101776996	rs1061436	G	C	0.11	0.03	0.25	exonic	UTP20	nonsynonymous SNV	P-K+	PK	0.01359	0.0847
12_65448986	rs1026024	G	A	0.08	0.03	0.25	exonic	WIF1	synonymous SNV	P-K+	PK	0.01359	0.05527
16_72184629	rs217180	C	T	0	0.03	0.25	exonic	PMFBP1	nonsynonymous SNV	P-K+	PK	0.01359	0.05527
16_89238215	rs139759411	C	T	0.11	0.03	0.25	UTR5	CDH15	.	P-K+	PK	0.01359	0.1065
17_72295966	rs34159194	C	T	0.14	0.03	0.25	exonic	DNAI2	synonymous SNV	P-K+	PK	0.01359	0.1065
19_36505683	rs1043822	G	A	0.08	0.03	0.25	UTR3	CLIP3	.	P-K+	PK	0.01359	0.1065
19_51834937	rs36054492	C	A	0.06	0.03	0.25	UTR3	VSIG10L	.	P-K+	PK	0.01359	0.05527
2_228475472	rs2176189	C	A	0.89	0.75	0.97	UTR3	C2orf83	.	P-K+	PK	0.01359	0.1065
2_242615472	rs3209844	G	A	0.11	0.03	0.25	UTR3	DTYMK	.	P-K+	PK	0.01359	0.0847
3_122646734	rs2276775	C	T	0.03	0.03	0.25	exonic	SEMA5B	synonymous SNV	P-K+	PK	0.01359	0.05527
3_141162128	rs62282002	C	G	0.06	0.03	0.25	exonic	ZBTB38	nonsynonymous SNV	P-K+	PK	0.01359	0.05527
4_2743999	rs232712	A	G	0.86	0.75	0.97	exonic	TNIP2	synonymous SNV	P-K+	PK	0.01359	0.1514
5_5462607	rs3806873	A	G	0.08	0.03	0.25	exonic	ICE1	nonsynonymous SNV	P-K+	PK	0.01359	0.1514
5_5462620	rs3806874	G	A	0.08	0.03	0.25	exonic	ICE1	nonsynonymous SNV	P-K+	PK	0.01359	0.1514
6_145103215	rs10499236	C	T	0.11	0.03	0.25	exonic	UTRN	synonymous SNV	P-K+	PK	0.01359	0.1514
7_82583609	rs10487648	A	C	0.14	0.03	0.25	exonic	PCLO	nonsynonymous SNV	P-K+	PK	0.01359	0.05527
7_107218033	rs711442	T	C	0.5	0.27	0.67	UTR3	DUS4L	.	P-K+	PK	0.01366	0.01445
16_29677843	rs11574559	T	A	0.11	0	0.27	UTR3	SPN	.	P-K+	PK	0.01374	0.01549
1_111893958	rs1668	A	G	0.34	0.15	0.43	UTR3	PIFO	.	P-K+	PK	0.01378	0.02701
5_173431551	rs60399694	A	T	0.08	0.03	0.25	UTR3	C5orf47	.	P-K+	PK	0.0138	0.08024
10_91179829	rs303172	T	C	0.53	0.47	0.78	UTR3	IFIT5	.	P-K+	PK	0.01419	0.05371
17_72246101	rs3897753	T	C	0.47	0.22	0.53	exonic	TTYH2	synonymous SNV	P-K+	PK	0.01419	0.05371
3_124439127	rs332513	T	A	0.33	0.22	0.53	UTR3	KALRN	.	P-K+	PK	0.01419	0.05371
3_151034602	rs1472122	G	A	0.53	0.47	0.78	UTR5	GPR87	.	P-K+	PK	0.01419	0.05771
4_151505322	rs13105060	T	A	0.58	0.47	0.78	UTR3	MAB21L2	.	P-K+	PK	0.01419	0.08979
6_117923599	rs3752848	T	C	0.33	0.22	0.53	UTR5	GOPC	.	P-K+	PK	0.01419	0.08497
19_54726226	rs75672336	T	C	0.77	0.71	1	intronic	LILRB3	.	P-K+	PK	0.01432	0.01848
3_45187785	rs2276862	C	G	0.25	0.03	0.26	UTR5	CDCP1	.	P-K+	PK	0.01466	0.05489
22_51206426	rs3888555	T	C	0.09	0.06	0.31	ncRNA_UTR3	RABL2B	.	P-K+	PK	0.01484	0.03996
22_50278568	rs910799	A	G	0.56	0.53	0.83	exonic	ZBED4	nonsynonymous SNV	P-K+	PK	0.01485	0.02745
14_94512785	rs3827900	A	G	0.28	0.24	0.53	UTR3	OTUB2	.	P-K+	PK	0.01504	0.04661
15_48063076	rs568215	T	C	0.72	0.59	0.86	exonic	SEMA6D	synonymous SNV	P-K+	PK	0.0151	0.0367
5_96254354	rs1230382	T	A	0.5	0.41	0.72	UTR3	ERAP2	.	P-K+	PK	0.0151	0.0541
2_157181925	rs12803	A	C	0.14	0.04	0.32	UTR3	NR4A2	.	P-K+	PK	0.01528	0.02006
6_168226523	rs611440	C	T	0.21	0.15	0.44	ncRNA_exonic	AFDN-DT	.	P-K+	PK	0.01544	0.04203
6_76624741	rs12606	C	T	0.29	0.15	0.44	UTR3	MYO6	.	P-K+	PK	0.01544	0.02912
14_93404674	rs6575304	T	C	0.42	0.31	0.62	UTR3	ITPK1	.	P-K+	PK	0.01555	0.05107
10_52103707	rs10763354	A	G	0.39	0.25	0.56	exonic	SGMS1	synonymous SNV	P-K+	PK	0.01558	0.08979
10_74268031	rs3793927	T	C	0.36	0.25	0.56	exonic	MICU1	unknown	P-K+	PK	0.01558	0.1435
12_49522578	rs1057725	T	C	0.53	0.44	0.75	exonic	TUBA1B	synonymous SNV	P-K+	PK	0.01558	0.09619
16_30380872	rs71389465	C	G	0.47	0.25	0.56	exonic	TBC1D10B	nonsynonymous SNV	P-K+	PK	0.01558	0.05771
22_50281917	rs4624	A	G	0.47	0.44	0.75	UTR3	ZBED4	.	P-K+	PK	0.01558	0.05611
22_50282603	rs738711	A	G	0.47	0.44	0.75	UTR3	ZBED4	.	P-K+	PK	0.01558	0.05611
6_31239518	rs1050420	C	T	0.44	0.44	0.75	exonic	HLA-C	synonymous SNV	P-K+	PK	0.01558	0.05851
8_2793302	rs673430	T	C	0.28	0.25	0.56	UTR3	CSMD1	.	P-K+	PK	0.01558	0.07907
9_100087345	rs3747496	A	G	0.69	0.44	0.75	exonic	CCDC180	synonymous SNV	P-K+	PK	0.01558	0.05054
9_14737506	rs10961689	T	G	0.44	0.44	0.75	exonic	FREM1	nonsynonymous SNV	P-K+	PK	0.01558	0.09353
1_62902874	rs646179	A	G	0.72	0.66	0.91	UTR5	USP1	.	P-K+	PK	0.01568	0.03191
13_19586135	rs9511060	A	T	0.69	0.38	0.69	ncRNA_exonic	LINC00442	.	P-K+	PK	0.01578	0.03066
6_145051594	rs4305737	G	A	0.53	0.38	0.69	exonic	UTRN	synonymous SNV	P-K+	PK	0.01578	0.05256
14_23778698	rs1950252	A	G	0.5	0.56	0.84	UTR3	BCL2L2	.	P-K+	PK	0.0161	0.02256
19_43696975	rs12426	A	G	0.53	0.33	0.65	UTR3	PSG4	.	P-K+	PK	0.01613	0.05771
2_231406680	rs836237	T	C	0.83	0.68	0.92	exonic	SP100	nonsynonymous SNV	P-K+	PK	0.0166	0.07517
1_24200800	rs1105	T	C	0.57	0.44	0.74	UTR3	CNR2	.	P-K+	PK	0.01661	0.03059
12_113398919	rs2072136	G	A	0.47	0.26	0.56	exonic	OAS3	synonymous SNV	P-K+	PK	0.01661	0.05371
6_123537837	rs7743126	A	G	0.1	0.26	0.56	UTR3	TRDN	.	P-K+	PK	0.01661	0.06248
17_5418107	rs74929853	G	A	0.17	0.14	0.42	exonic	NLRP1	synonymous SNV	P-K+	PK	0.01664	0.09423
17_5424886	rs2301583	G	A	0.14	0.14	0.42	exonic	NLRP1	synonymous SNV	P-K+	PK	0.01664	0.09423
18_5144730	rs12963531	G	A	0.17	0.14	0.42	UTR3	AKAIN1	.	P-K+	PK	0.01664	0.055
3_195451881	rs146888306	G	A	0.69	0.58	0.86	exonic	MUC20	nonsynonymous SNV	P-K+	PK	0.01664	0.1285
3_42781276	rs62246603	G	T	0.33	0.14	0.42	exonic	CCDC13	synonymous SNV	P-K+	PK	0.01664	0.07208
3_78646942	rs7626143	T	G	0.25	0.14	0.42	UTR3	ROBO1	.	P-K+	PK	0.01664	0.09423
4_46038274	rs10938423	T	C	0.28	0.14	0.42	UTR3	GABRG1	.	P-K+	PK	0.01664	0.06404
5_140098596	rs12188417	T	G	0.39	0.14	0.42	ncRNA_exonic	VTRNA1-2	.	P-K+	PK	0.01664	0.04198
6_28471560	rs35921765	A	C	0.31	0.14	0.42	UTR3	GPX6	.	P-K+	PK	0.01664	0.04198
7_141952110	rs1052406	G	A	0.19	0.14	0.42	exonic	PRSS58	synonymous SNV	P-K+	PK	0.01664	0.06404
17_1637458	rs8065251	G	A	0.5	0.28	0.58	exonic	WDR81	synonymous SNV	P-K+	PK	0.01666	0.05771
20_60791404	rs3787429	C	T	0.72	0.42	0.72	exonic	HRH3	synonymous SNV	P-K+	PK	0.01666	0.08497
3_13407556	rs3732671	T	C	0.44	0.28	0.58	exonic	NUP210	nonsynonymous SNV	P-K+	PK	0.01666	0.05371
4_152201053	rs36097019	G	A	0.44	0.28	0.58	exonic	PRSS48	nonsynonymous SNV	P-K+	PK	0.01666	0.05611
4_152212486	rs13126069	C	T	0.44	0.28	0.58	exonic	PRSS48	nonsynonymous SNV	P-K+	PK	0.01666	0.05611
4_7778524	rs10516187	G	T	0.44	0.28	0.58	ncRNA_exonic	AFAP1-AS1	.	P-K+	PK	0.01666	0.05611
5_57750350	rs15009	C	G	0.41	0.31	0.61	UTR3	PLK2	.	P-K+	PK	0.01666	0.02563
6_7601720	rs3734586	C	T	0.44	0.28	0.58	exonic	SNRNP48	synonymous SNV	P-K+	PK	0.01666	0.05771
7_16640201	rs1044984	G	C	0.5	0.28	0.58	UTR3	ANKMY2	.	P-K+	PK	0.01666	0.05611
7_82582846	rs10954696	C	T	0.5	0.28	0.58	exonic	PCLO	nonsynonymous SNV	P-K+	PK	0.01666	0.09619
2_26953540	rs1627854	A	G	0.47	0.53	0.82	UTR3	KCNK3	.	P-K+	PK	0.01681	0.02234
10_112629911	rs1322995	G	A	0.59	0.43	0.77	ncRNA_exonic	PDCD4-AS1	.	P-K+	PK	0.01686	0.03072
1_31342590	rs6943	G	T	0.32	0.16	0.44	UTR3	SDC3	.	P-K+	PK	0.01703	0.06104
19_18124755	rs10426256	A	G	0.27	0.12	0.39	UTR3	ARRDC2	.	P-K+	PK	0.01711	0.0376
7_4308181	rs117603586	G	A	0.07	0.03	0.25	UTR3	SDK1	.	P-K+	PK	0.01717	0.04962
16_4796399	rs61746912	C	T	0.25	0.15	0.42	exonic	C16orf71	nonsynonymous SNV	P-K+	PK	0.01725	0.0367
7_141628704	rs11770855	T	C	0.24	0.15	0.42	UTR3	CLEC5A	.	P-K+	PK	0.01725	0.05662
14_92435587	rs12587248	T	C	0.28	0.31	0.61	UTR3	TRIP11	.	P-K+	PK	0.01739	0.08497
15_52901977	rs2414166	G	A	0.67	0.39	0.69	exonic	FAM214A	synonymous SNV	P-K+	PK	0.01739	0.05054
16_88552370	rs3751673	A	G	0.47	0.31	0.61	exonic	ZFPM1	nonsynonymous SNV	P-K+	PK	0.01739	0.09779
17_1641035	rs2287322	A	G	0.5	0.31	0.61	UTR3	WDR81	.	P-K+	PK	0.01739	0.05851
17_1648502	rs2070863	C	T	0.5	0.31	0.61	exonic	SERPINF2	nonsynonymous SNV	P-K+	PK	0.01739	0.05851
2_40341605	rs5543	G	A	0.47	0.39	0.69	ncRNA_UTR3	SLC8A1	.	P-K+	PK	0.01739	0.05851
7_72300332	rs2240537	G	A	0.25	0.31	0.61	ncRNA_exonic	SBDSP1	.	P-K+	PK	0.01739	0.05371
9_117002517	rs2014134	C	T	0.44	0.39	0.69	exonic	COL27A1	synonymous SNV	P-K+	PK	0.01739	0.05851
13_103504517	rs1047768	T	C	0.39	0.33	0.64	exonic	BIVM-ERCC5,ERCC5	synonymous SNV	P-K+	PK	0.01776	0.09353
17_7530271	rs858520	C	T	0.31	0.33	0.64	exonic	SAT2	synonymous SNV	P-K+	PK	0.01776	0.08979
19_53612745	rs1133327	T	C	0.47	0.33	0.64	exonic	ZNF415	nonsynonymous SNV	P-K+	PK	0.01776	0.05851
19_53612757	rs1054485	T	G	0.47	0.33	0.64	exonic	ZNF415	nonsynonymous SNV	P-K+	PK	0.01776	0.05851
3_123665902	rs17310144	T	G	0.36	0.33	0.64	exonic	CCDC14	nonsynonymous SNV	P-K+	PK	0.01776	0.09619
3_38529818	rs7433277	C	T	0.36	0.33	0.64	UTR3	ACVR2B	.	P-K+	PK	0.01776	0.05771
3_38529825	rs2370840	C	T	0.36	0.33	0.64	UTR3	ACVR2B	.	P-K+	PK	0.01776	0.05771
22_42777621	rs11090090	A	G	0.22	0.13	0.43	UTR3	NFAM1	.	P-K+	PK	0.01821	0.02678
1_173907812	rs6703547	C	T	0.11	0.08	0.33	UTR3	RC3H1	.	P-K+	PK	0.01824	0.0847
1_176809368	rs12118034	C	T	0.22	0.08	0.33	exonic	PAPPA2	synonymous SNV	P-K+	PK	0.01824	0.07949
1_201299391	rs7541805	G	C	0.06	0.08	0.33	UTR3	PKP1	.	P-K+	PK	0.01824	0.1113
1_21047616	rs637990	G	A	0.19	0.08	0.33	UTR3	SH2D5	.	P-K+	PK	0.01824	0.1348
1_248059476	rs12139390	A	C	0.61	0.67	0.92	exonic	OR2W3	nonsynonymous SNV	P-K+	PK	0.01824	0.0451
11_2291982	rs968528	T	A	0.34	0.08	0.33	UTR5	ASCL2	.	P-K+	PK	0.01824	0.04203
11_2797237	rs1057128	G	A	0.14	0.08	0.33	exonic	KCNQ1	synonymous SNV	P-K+	PK	0.01824	0.0847
12_132682481	rs12308155	T	G	0.83	0.67	0.92	exonic	GALNT9	synonymous SNV	P-K+	PK	0.01824	0.09423
12_132682484	rs12306514	A	G	0.83	0.67	0.92	exonic	GALNT9	synonymous SNV	P-K+	PK	0.01824	0.09423
16_89295046	rs12927047	T	C	0.33	0.08	0.33	UTR3	ZNF778	.	P-K+	PK	0.01824	0.09423
2_205829991	rs236843	C	T	0.81	0.67	0.92	exonic	PARD3B	synonymous SNV	P-K+	PK	0.01824	0.0632
2_231331896	rs1050224	G	A	0.89	0.67	0.92	exonic	SP100	synonymous SNV	P-K+	PK	0.01824	0.0847
22_44342969	rs2008451	T	C	0.25	0.08	0.33	UTR3	PNPLA3	.	P-K+	PK	0.01824	0.07949
3_44612050	rs9873604	C	T	0.69	0.67	0.92	exonic	ZKSCAN7	nonsynonymous SNV	P-K+	PK	0.01824	0.07949
3_9908525	rs2479	A	G	0.81	0.67	0.92	UTR3	CIDEC	.	P-K+	PK	0.01824	0.09423
4_177249533	rs2278903	A	G	0.14	0.08	0.33	UTR3	SPCS3	.	P-K+	PK	0.01824	0.0632
4_177249756	rs3733371	A	G	0.14	0.08	0.33	UTR3	SPCS3	.	P-K+	PK	0.01824	0.0632
5_180229896	rs62407767	A	C	0.22	0.08	0.33	intronic	MGAT1	.	P-K+	PK	0.01824	0.0632
9_119463189	rs2281627	T	C	0.28	0.08	0.33	UTR3	TRIM32	.	P-K+	PK	0.01824	0.1073
6_31557791	rs11575839	G	A	0.15	0.17	0.44	exonic	NCR3	synonymous SNV	P-K+	PK	0.0184	0.03174
6_76344431	rs17414086	C	T	0.33	0.17	0.44	exonic	SENP6	nonsynonymous SNV	P-K+	PK	0.0184	0.0367
5_53180890	rs40211	C	T	0.8	0.54	0.86	UTR3	ARL15	.	P-K+	PK	0.01863	0.02159
19_45868309	rs238406	T	G	0.56	0.32	0.61	exonic	ERCC2	synonymous SNV	P-K+	PK	0.01879	0.05851
19_49527408	rs201181723	T	C	0.53	0.32	0.61	UTR5	CGB3	.	P-K+	PK	0.01879	0.05851
19_49527413	rs201985302	C	G	0.53	0.32	0.61	UTR5	CGB3	.	P-K+	PK	0.01879	0.05851
19_53612311	rs4803051	T	C	0.47	0.32	0.61	exonic	ZNF415	synonymous SNV	P-K+	PK	0.01879	0.05487
22_50278642	rs910800	C	T	0.47	0.39	0.68	exonic	ZBED4	synonymous SNV	P-K+	PK	0.01879	0.03066
11_112014136	rs5744292	T	C	0	0	0.33	UTR3	IL18	.	P-K+	PK	0.01906	0.02158
11_2291715	rs7126721	G	T	0.31	0.03	0.27	UTR5	ASCL2	.	P-K+	PK	0.01911	0.02219
8_38965271	rs59118660	C	T	0.28	0.22	0.53	exonic	ADAM32	synonymous SNV	P-K+	PK	0.01923	0.05768
12_101780048	rs4764795	C	T	0.06	0	0.25	UTR3	UTP20	.	P-K+	PK	0.01991	0.04712
10_104434209	rs1043450	A	G	0.23	0.06	0.3	UTR3	ARL3	.	P-K+	PK	0.02002	0.05397
17_70122108	rs1042678	G	A	0.14	0	0.21	UTR3	SOX9	.	P-K+	PK	0.02006	0.02296
6_30080208	rs151255204	G	A	0.14	0	0.21	exonic	TRIM31	synonymous SNV	P-K+	PK	0.02006	0.02296
1_39351659	rs9439088	G	A	0.61	0.56	0.83	UTR3	RHBDL2	.	P-K+	PK	0.02018	0.07907
14_69062114	rs963918	C	T	0.67	0.56	0.83	UTR3	RAD51B	.	P-K+	PK	0.02018	0.04198
14_92506583	rs58339937	T	C	0.25	0.17	0.44	upstream	TRIP11	.	P-K+	PK	0.02018	0.07208
15_54919047	rs1520411	A	G	0.72	0.56	0.83	exonic	UNC13C	synonymous SNV	P-K+	PK	0.02018	0.07907
16_21145648	rs11074483	C	T	0.22	0.17	0.44	exonic	DNAH3	synonymous SNV	P-K+	PK	0.02018	0.07208
17_8706451	rs2242375	T	C	0.58	0.17	0.44	UTR3	PIK3R6	.	P-K+	PK	0.02018	0.05371
21_30547683	rs2832237	G	C	0.5	0.56	0.83	UTR3	MAP3K7CL	.	P-K+	PK	0.02018	0.05054
3_149488442	rs7630153	A	G	0.25	0.17	0.44	exonic	ANKUB1	synonymous SNV	P-K+	PK	0.02018	0.06404
4_46038745	rs12374299	T	A	0.33	0.17	0.44	UTR3	GABRG1	.	P-K+	PK	0.02018	0.07208
4_46039478	rs13115251	C	T	0.33	0.17	0.44	UTR3	GABRG1	.	P-K+	PK	0.02018	0.07208
4_46039625	rs11937872	T	G	0.33	0.17	0.44	UTR3	GABRG1	.	P-K+	PK	0.02018	0.07208
4_46039718	rs7666844	C	T	0.33	0.17	0.44	UTR3	GABRG1	.	P-K+	PK	0.02018	0.07208
4_46040367	rs1497565	T	G	0.33	0.17	0.44	UTR3	GABRG1	.	P-K+	PK	0.02018	0.07208
4_46040616	rs1497566	T	G	0.33	0.17	0.44	UTR3	GABRG1	.	P-K+	PK	0.02018	0.07208
4_46040738	rs1497567	G	A	0.33	0.17	0.44	UTR3	GABRG1	.	P-K+	PK	0.02018	0.07208
4_46041093	rs6447492	C	T	0.31	0.17	0.44	UTR3	GABRG1	.	P-K+	PK	0.02018	0.07208
4_46042945	rs6447493	C	T	0.33	0.17	0.44	UTR3	GABRG1	.	P-K+	PK	0.02018	0.07208
7_37953840	rs1132552	C	T	0.78	0.56	0.83	exonic	SFRP4	synonymous SNV	P-K+	PK	0.02018	0.09423
7_55238268	rs10228436	G	A	0.26	0.17	0.44	UTR3	EGFR	.	P-K+	PK	0.02018	0.07392
9_107624029	rs2230805	C	T	0.22	0.17	0.44	exonic	ABCA1	synonymous SNV	P-K+	PK	0.02018	0.1073
1_115316158	rs3827739	T	C	0.2	0.18	0.44	UTR3	SIKE1	.	P-K+	PK	0.02098	0.04903
1_206730641	rs71633591	C	A	0.19	0.18	0.44	UTR5	RASSF5	.	P-K+	PK	0.02098	0.06797
1_31344250	rs3766286	A	G	0.36	0.18	0.44	UTR3	SDC3	.	P-K+	PK	0.02098	0.07907
12_52984620	rs12818575	C	T	0.29	0.18	0.44	exonic	KRT72	synonymous SNV	P-K+	PK	0.02098	0.07907
14_92527399	rs1055996	A	G	0.15	0.18	0.44	UTR3	ATXN3	.	P-K+	PK	0.02098	0.06404
3_124456742	rs1801019	G	C	0.28	0.18	0.44	exonic	UMPS	nonsynonymous SNV	P-K+	PK	0.02098	0.03903
22_51206413	rs3888556	T	A	0.12	0.06	0.28	ncRNA_UTR3	RABL2B	.	P-K+	PK	0.02099	0.04458
19_10132859	rs1644730	T	A	0.69	0.53	0.81	UTR3	RDH8	.	P-K+	PK	0.02145	0.07474
7_1976457	rs1801368	C	T	0.22	0.19	0.47	exonic	MAD1L1	nonsynonymous SNV	P-K+	PK	0.02145	0.05619
9_114659381	rs538512226	A	G	0	0	0.18	UTR5	UGCG	.	P-K+	PK	0.02145	0.05188
4_88225233	rs11727374	A	G	0	0	0.27	UTR3	HSD17B13	.	P-K+	PK	0.02161	0.02254
17_41845235	rs1230398	C	A	0.85	0.74	0.94	UTR3	DUSP3	.	P-K+	PK	0.02186	0.06151
3_113679589	rs12629415	C	A	0.19	0.06	0.26	UTR3	ZDHHC23	.	P-K+	PK	0.02186	0.05527
5_1224083	rs7733146	C	A	0.06	0.06	0.26	UTR3	SLC6A19	.	P-K+	PK	0.02186	0.08323
14_74876501	rs4026651	G	C	0.23	0.22	0.5	UTR5	SYNDIG1L	.	P-K+	PK	0.0222	0.02916
12_124243707	rs10744162	T	C	0.53	0.43	0.72	UTR3	ATP6V0A2	.	P-K+	PK	0.02261	0.0257
7_121944527	rs11761299	T	C	0.46	0.44	0.73	ncRNA_UTR5	FEZF1	.	P-K+	PK	0.02262	0.0337
7_156764887	rs3800867	G	A	0.41	0.23	0.57	UTR3	NOM1	.	P-K+	PK	0.02271	0.03044
12_124246004	rs2333834	G	A	0.61	0.5	0.78	UTR3	ATP6V0A2	.	P-K+	PK	0.02276	0.05258
16_88744509	rs72811438	C	T	0	0	0.15	ncRNA_UTR3	SNAI3	.	P-K+	PK	0.02299	0.05339
2_17722042	rs1802174	G	A	0	0	0.15	UTR5	VSNL1	.	P-K+	PK	0.02299	0.1093
21_40190404	rs370030170	C	T	0	0	0.15	exonic	ETS2	synonymous SNV	P-K+	PK	0.02299	0.1093
1_236175327	rs3738531	C	A	0.31	0.19	0.47	exonic	NID1	nonsynonymous SNV	P-K+	PK	0.02344	0.1187
1_247835950	rs1151640	T	C	0.5	0.19	0.47	exonic	OR13G1	nonsynonymous SNV	P-K+	PK	0.02344	0.02873
14_20295763	rs11621854	C	T	0.33	0.19	0.47	exonic	OR4N2	synonymous SNV	P-K+	PK	0.02344	0.2003
15_68498052	rs11071991	T	C	0.18	0.19	0.47	UTR5	CALML4	.	P-K+	PK	0.02344	0.034
17_80615290	rs11105	C	T	0.61	0.53	0.81	UTR3	RAB40B	.	P-K+	PK	0.02344	0.07208
19_10131999	rs1644731	T	C	0.69	0.53	0.81	exonic	RDH8	nonsynonymous SNV	P-K+	PK	0.02344	0.08497
19_10132793	rs1673136	C	T	0.69	0.53	0.81	UTR3	RDH8	.	P-K+	PK	0.02344	0.08497
19_16040292	rs3765070	A	G	0.69	0.53	0.81	exonic	CYP4F11	synonymous SNV	P-K+	PK	0.02344	0.07208
19_21566680	rs7254436	C	G	0.33	0.19	0.47	UTR3	ZNF738	.	P-K+	PK	0.02344	0.08979
19_21567022	rs7254762	A	T	0.33	0.19	0.47	UTR3	ZNF738	.	P-K+	PK	0.02344	0.08979
19_21567360	rs1827225	A	G	0.33	0.19	0.47	UTR3	ZNF738	.	P-K+	PK	0.02344	0.08979
2_107450589	rs3796111	C	T	0.47	0.19	0.47	exonic	ST6GAL2	synonymous SNV	P-K+	PK	0.02344	0.07208
3_40251392	rs1799418	T	C	0.36	0.19	0.47	exonic	MYRIP	synonymous SNV	P-K+	PK	0.02344	0.07907
3_44884647	rs3804583	C	A	0.72	0.53	0.81	exonic	KIF15	nonsynonymous SNV	P-K+	PK	0.02344	0.07907
7_128293187	rs3213979	C	T	0.25	0.19	0.47	ncRNA_exonic	LINC01000	.	P-K+	PK	0.02344	0.07208
7_128294437	rs58123072	C	T	0.25	0.19	0.47	ncRNA_exonic	LINC01000	.	P-K+	PK	0.02344	0.07208
7_128294449	rs60229418	G	A	0.25	0.19	0.47	ncRNA_exonic	LINC01000	.	P-K+	PK	0.02344	0.07208
7_128295181	rs62481933	G	C	0.25	0.19	0.47	ncRNA_exonic	LINC01000	.	P-K+	PK	0.02344	0.07208
7_128300762	rs12670271	T	C	0.25	0.19	0.47	ncRNA_exonic	LINC01000	.	P-K+	PK	0.02344	0.07208
7_128315791	rs61738927	C	G	0.25	0.19	0.47	exonic	FAM71F2	synonymous SNV	P-K+	PK	0.02344	0.07208
5_149932996	rs1045539	G	A	0.09	0	0.2	UTR3	NDST1	.	P-K+	PK	0.02372	0.06275
1_115829313	rs6330	G	A	0.25	0.06	0.28	exonic	NGF	nonsynonymous SNV	P-K+	PK	0.02383	0.07949
1_37325477	rs6691840	A	C	0.11	0.06	0.28	exonic	GRIK3	nonsynonymous SNV	P-K+	PK	0.02383	0.1113
1_3786245	rs12738235	G	A	0.17	0.06	0.28	exonic	DFFB	nonsynonymous SNV	P-K+	PK	0.02383	0.0632
1_43784956	rs1199039	A	G	0.22	0.06	0.28	exonic	TIE1	synonymous SNV	P-K+	PK	0.02383	0.0847
11_70316391	rs55678639	A	G	0.19	0.06	0.28	UTR3	SHANK2	.	P-K+	PK	0.02383	0.0847
11_94335077	rs624184	C	T	0.25	0.06	0.28	exonic	PIWIL4	synonymous SNV	P-K+	PK	0.02383	0.1348
12_69202164	rs937283	A	G	0.13	0.06	0.28	UTR5	MDM2	.	P-K+	PK	0.02383	0.032
13_41949961	rs41288287	C	T	0.08	0.06	0.28	UTR3	NAA16	.	P-K+	PK	0.02383	0.1065
15_42820589	rs1060291	G	A	0.25	0.06	0.28	exonic	SNAP23	synonymous SNV	P-K+	PK	0.02383	0.09423
16_20975303	rs3743697	A	G	0.17	0.06	0.28	exonic	DNAH3	synonymous SNV	P-K+	PK	0.02383	0.1113
19_55174498	rs28366008	T	C	0.22	0.06	0.28	exonic	LILRB4	nonsynonymous SNV	P-K+	PK	0.02383	0.0632
2_152515683	rs75807392	G	A	0.14	0.06	0.28	exonic	NEB	nonsynonymous SNV	P-K+	PK	0.02383	0.1113
20_61907982	rs11542296	C	T	0	0.06	0.28	exonic	ARFGAP1	nonsynonymous SNV	P-K+	PK	0.02383	0.02813
22_37334953	rs6000495	G	A	0.25	0.06	0.28	UTR3	CSF2RB	.	P-K+	PK	0.02383	0.0632
3_128627933	rs876755	C	T	0.26	0.06	0.28	exonic	ACAD9	synonymous SNV	P-K+	PK	0.02383	0.046
3_49524778	rs6783003	G	C	0.11	0.06	0.28	UTR5	DAG1	.	P-K+	PK	0.02383	0.1113
3_53259850	rs3163	C	T	0.33	0.06	0.28	exonic	TKT	synonymous SNV	P-K+	PK	0.02383	0.07949
4_7775907	rs4689164	C	T	0.19	0.06	0.28	ncRNA_exonic	AFAP1-AS1	.	P-K+	PK	0.02383	0.0847
4_7777753	rs67476190	C	T	0.19	0.06	0.28	ncRNA_exonic	AFAP1-AS1	.	P-K+	PK	0.02383	0.0847
4_7778031	rs55752670	C	A	0.19	0.06	0.28	ncRNA_exonic	AFAP1-AS1	.	P-K+	PK	0.02383	0.0632
6_148871389	rs9485296	A	G	0.14	0.06	0.28	UTR3	SASH1	.	P-K+	PK	0.02383	0.03457
6_17282415	rs1108512	G	C	0.71	0.72	0.94	UTR5	RBM24	.	P-K+	PK	0.02383	0.08065
6_39871532	rs36017416	A	G	0.06	0.06	0.28	UTR3	DAAM2	.	P-K+	PK	0.02383	0.0847
6_90374283	rs16882046	A	G	0.28	0.06	0.28	exonic	MDN1	nonsynonymous SNV	P-K+	PK	0.02383	0.09423
7_100400654	rs56326327	G	C	0.11	0.06	0.28	UTR3	EPHB4	.	P-K+	PK	0.02383	0.1514
7_64865881	rs3910126	G	C	0.17	0.06	0.28	UTR3	ZNF92	.	P-K+	PK	0.02383	0.0632
[truncated: 5,224 more rows]
