# Supplementary material for: Whole Exome Sequencing in Healthy Individuals of Extreme Constitution Types Reveals Differential Disease Risk: A Novel Approach towards Predictive Medicine
Source: MDPI journal article supplement (doi:10.3390/jpm12030489), 2022-03-18
Supplement: s1 [file s1]

(A)

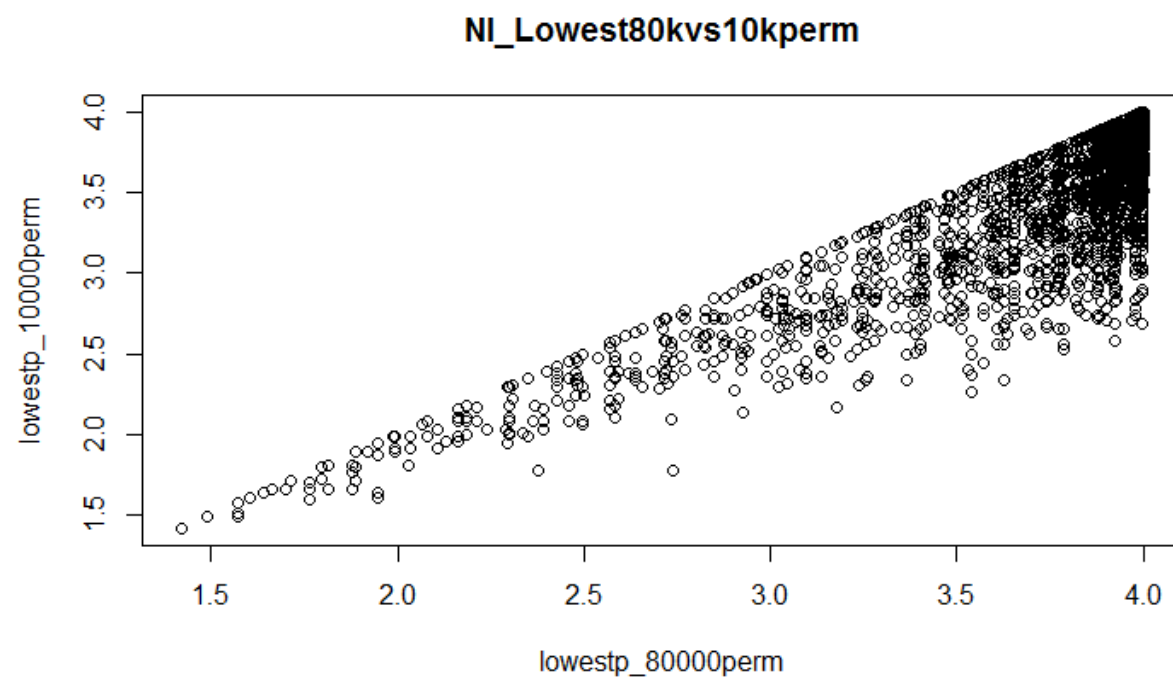

(B)

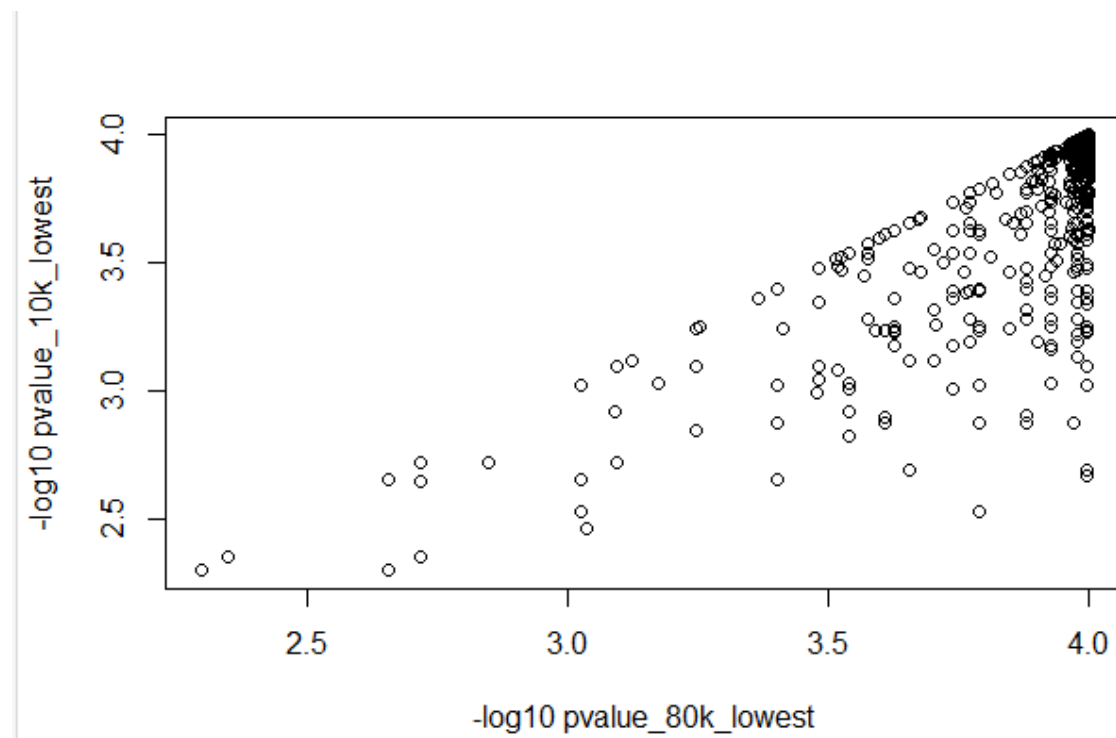

Supp Figure S1 : Scatter plot for lowest p value from 80000 permutation set vs 10000 permutation set in (A) NI (B) Vadu cohort
