# Supplementary figures and images for: Whole Exome Sequencing in Healthy Individuals of Extreme Constitution Types Reveals Differential Disease Risk: A Novel Approach towards Predictive Medicine
Source: MDPI journal article supplement (doi:10.3390/jpm12030489), 2022-03-18

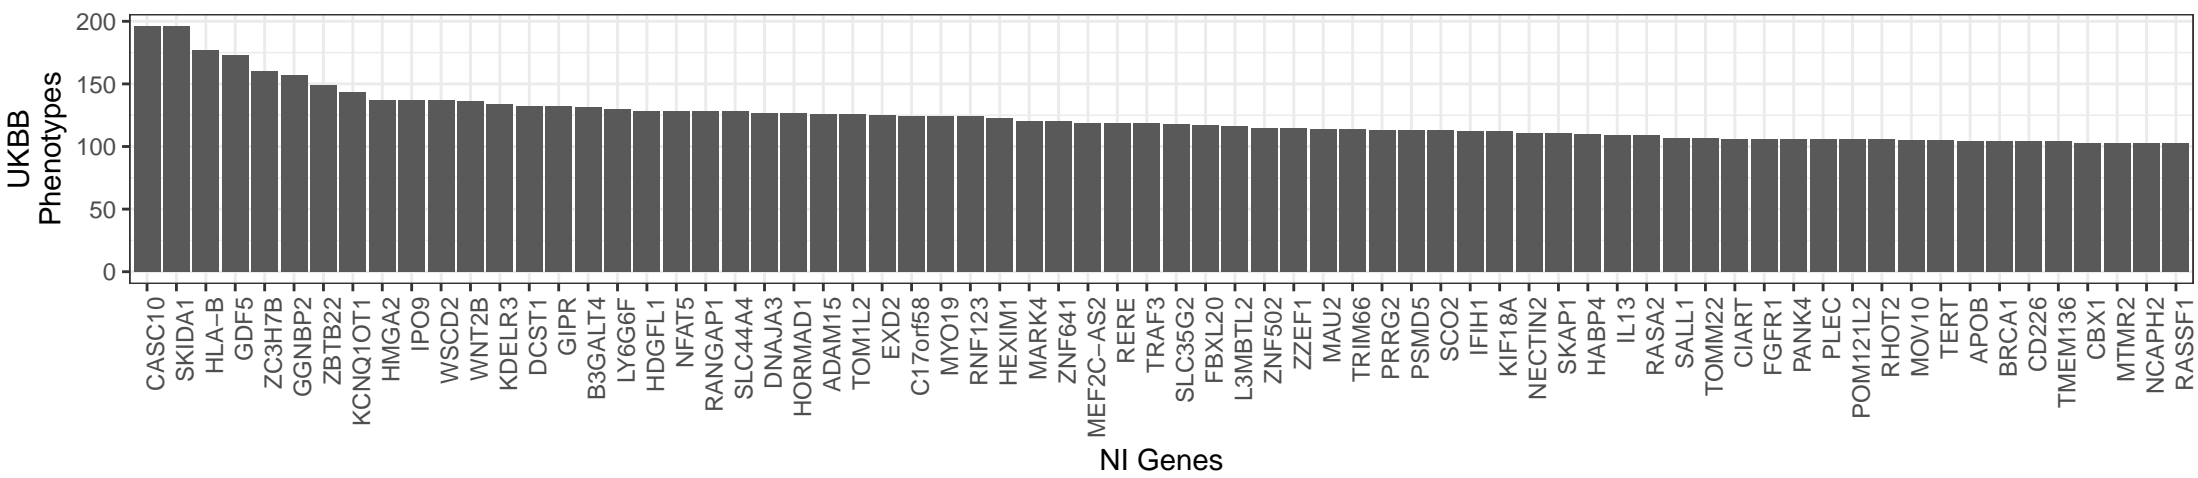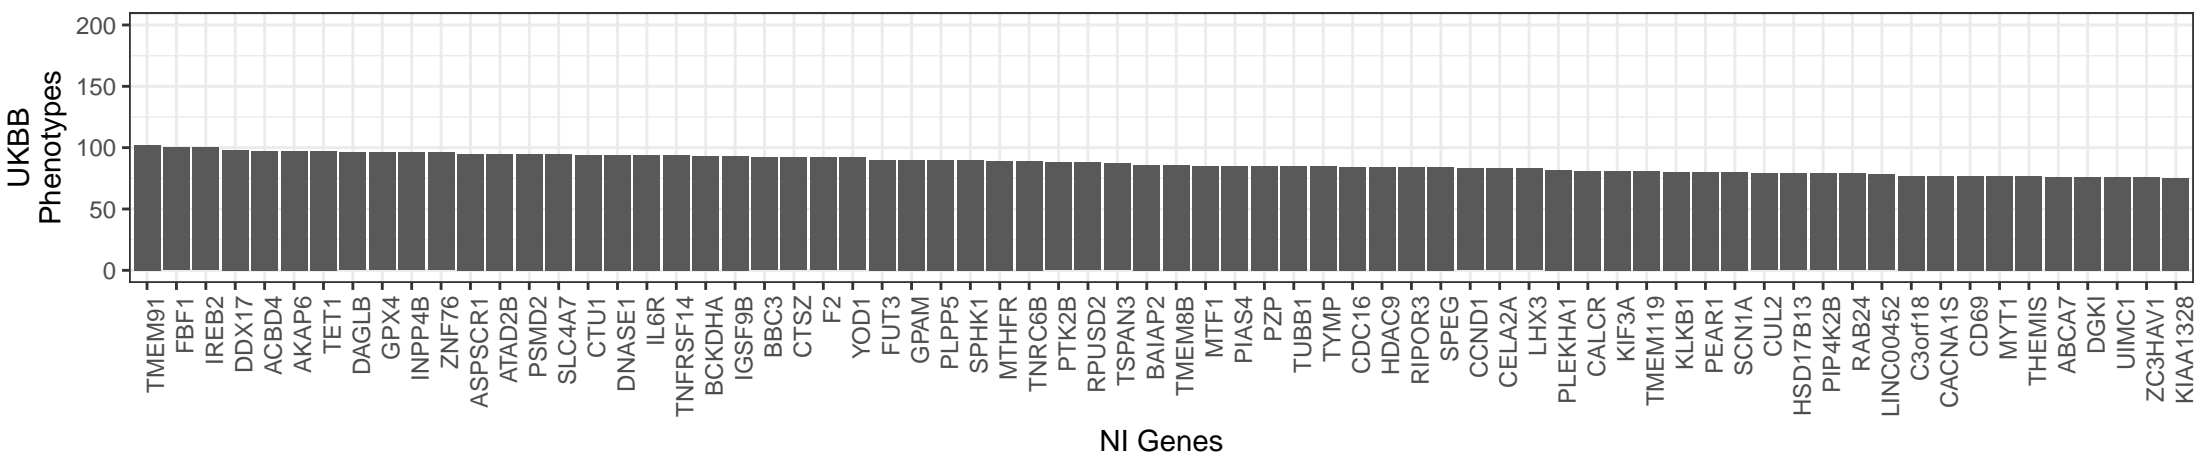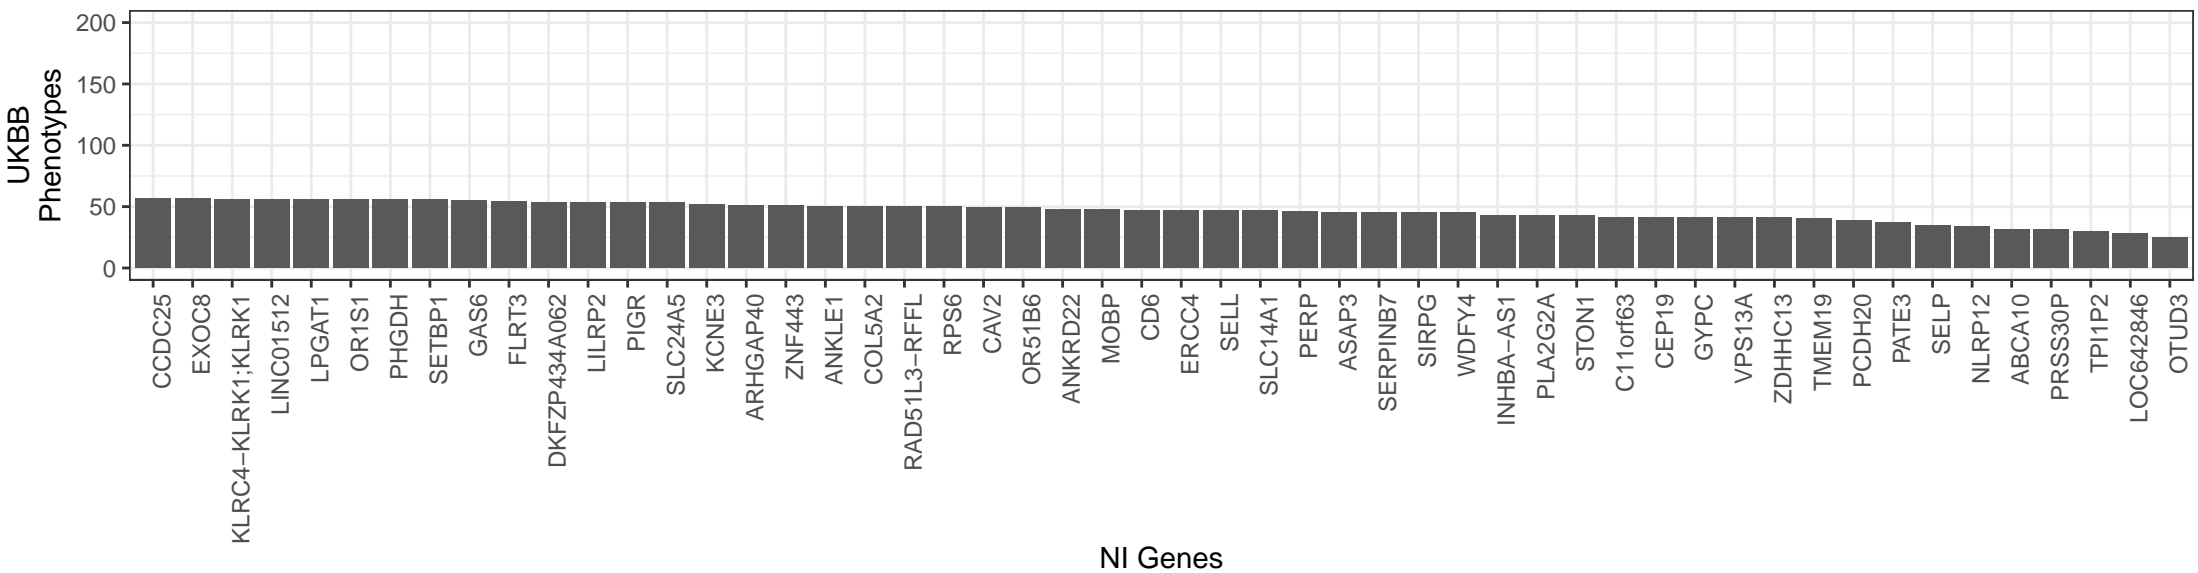

Supplement: s1 [file s1]

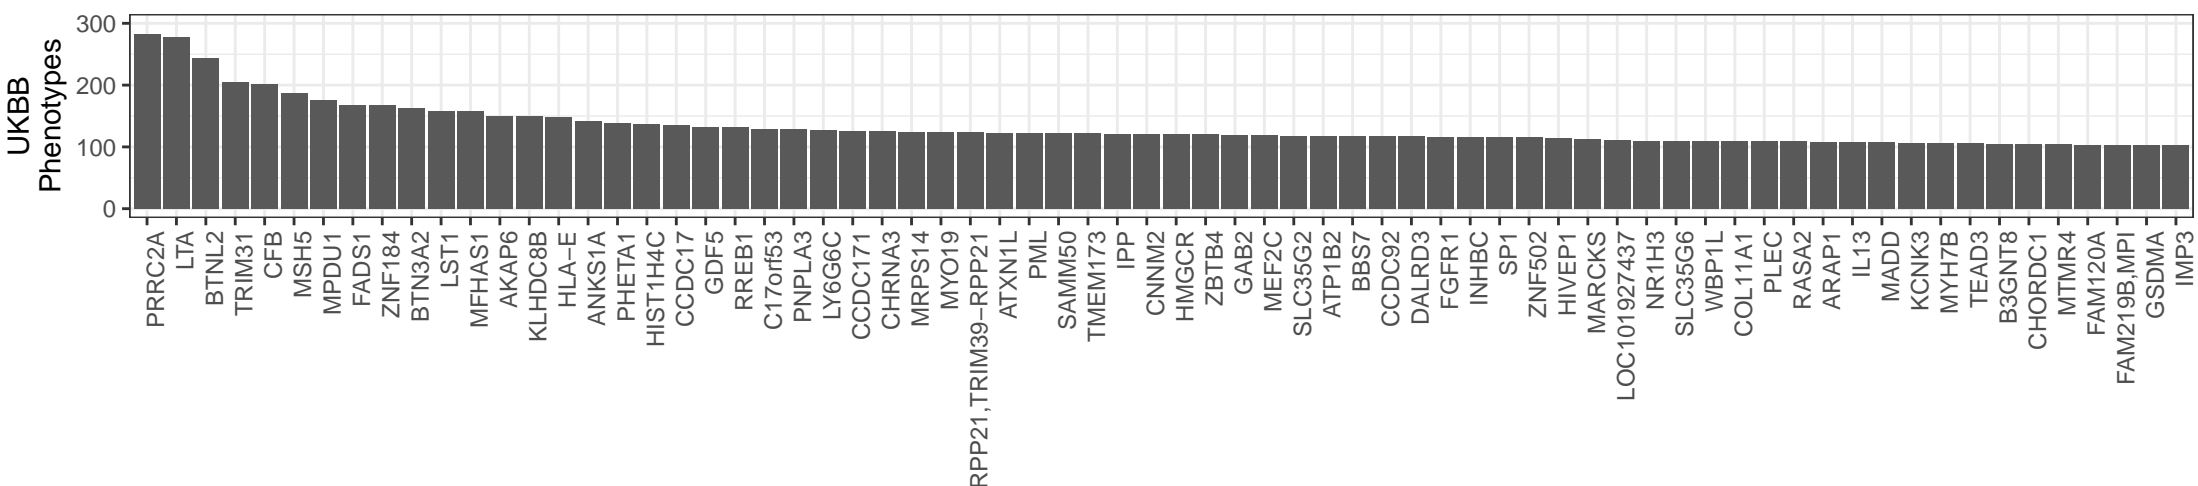

Vadu Genes

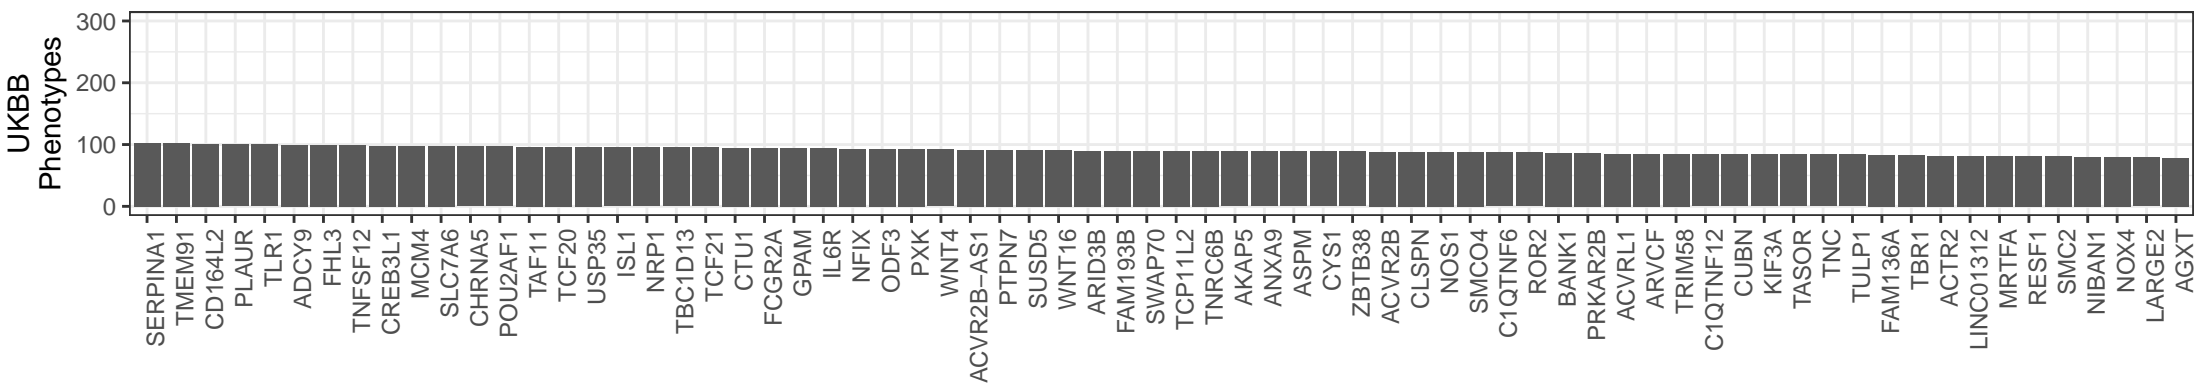

Vadu Genes

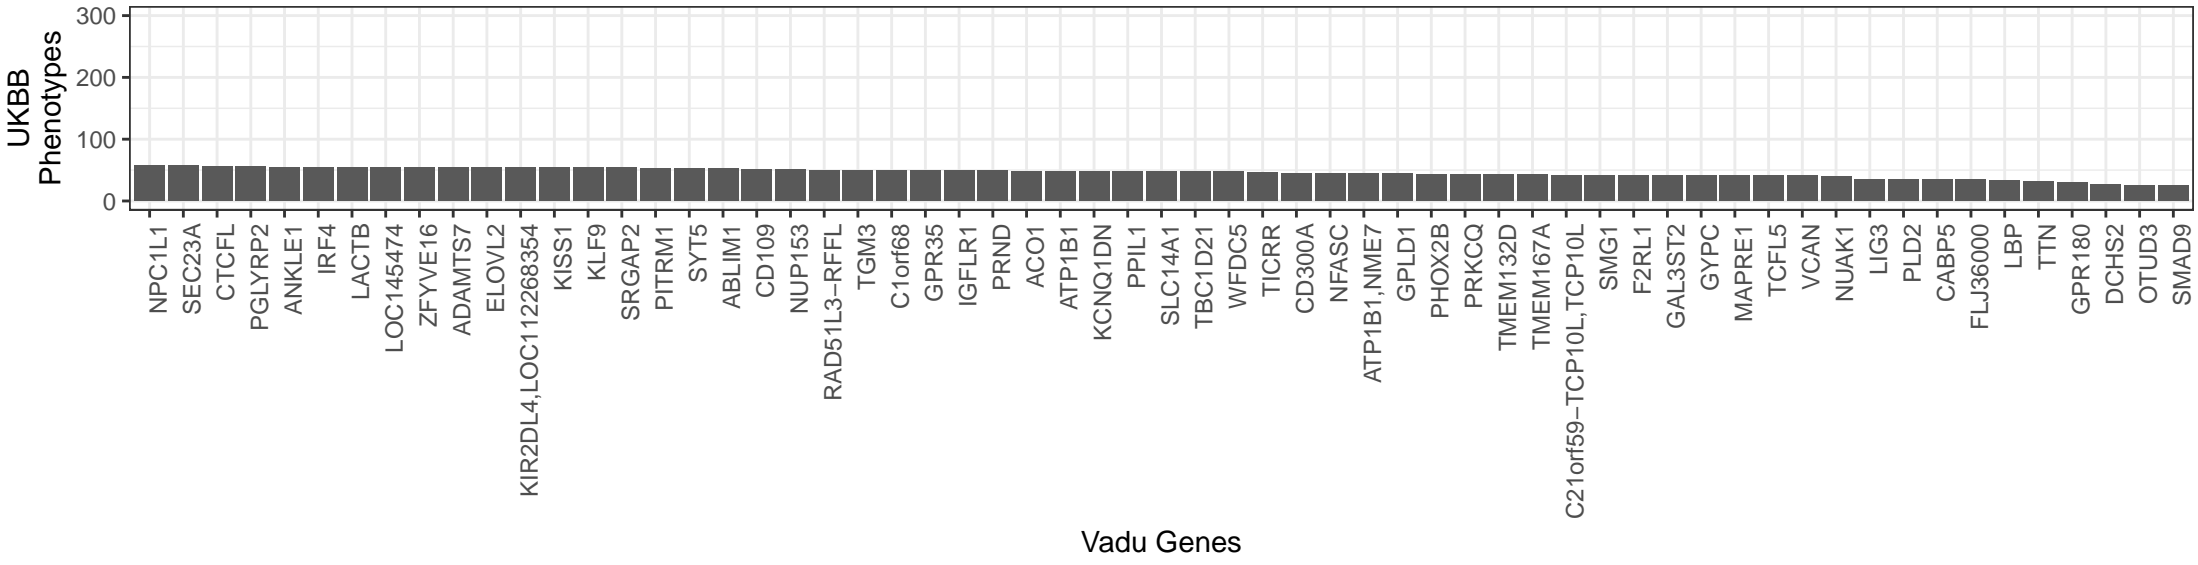

Vadu Genes

Supplement: s1 [file s1]

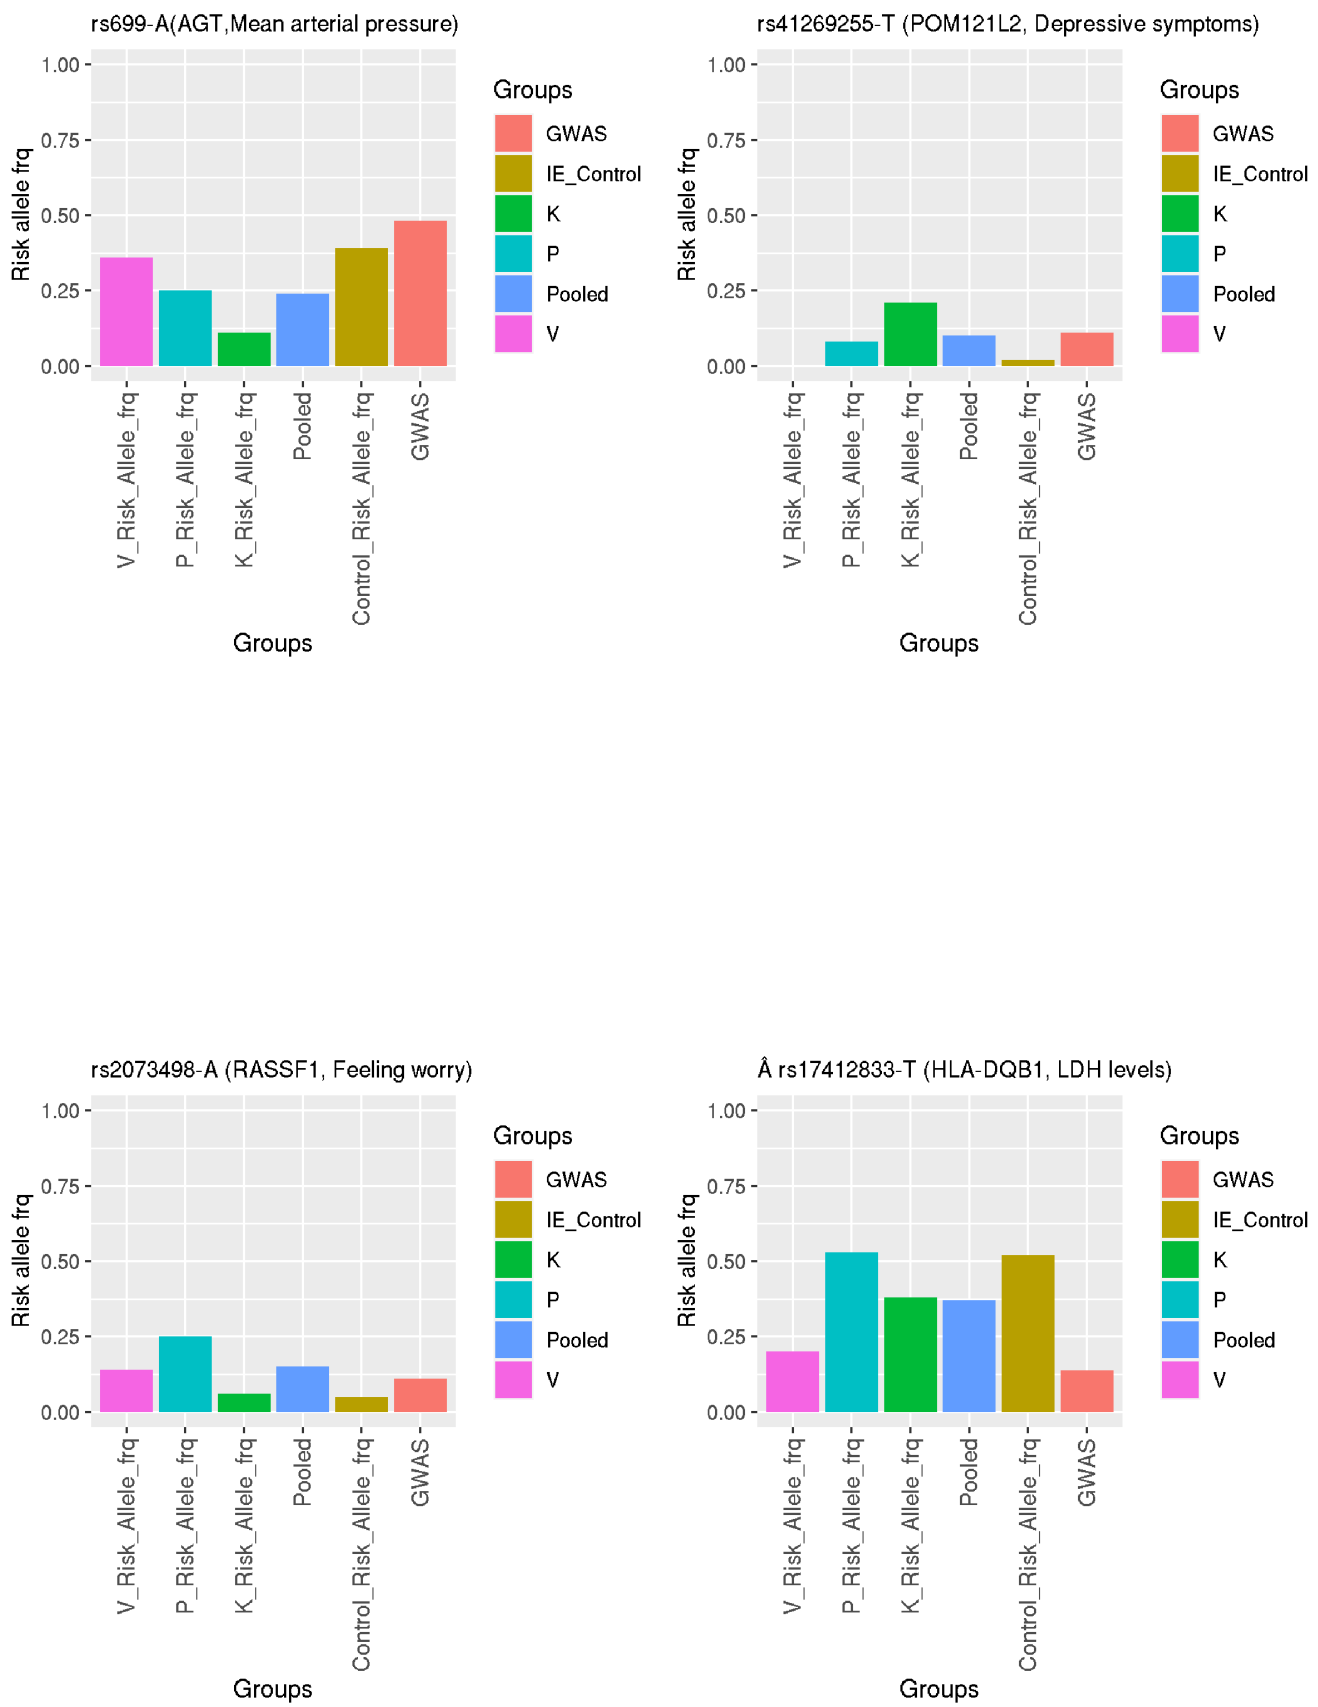

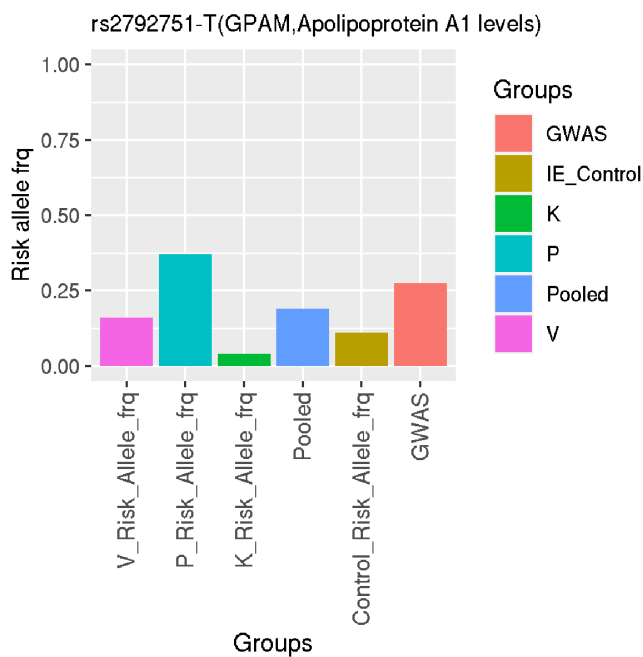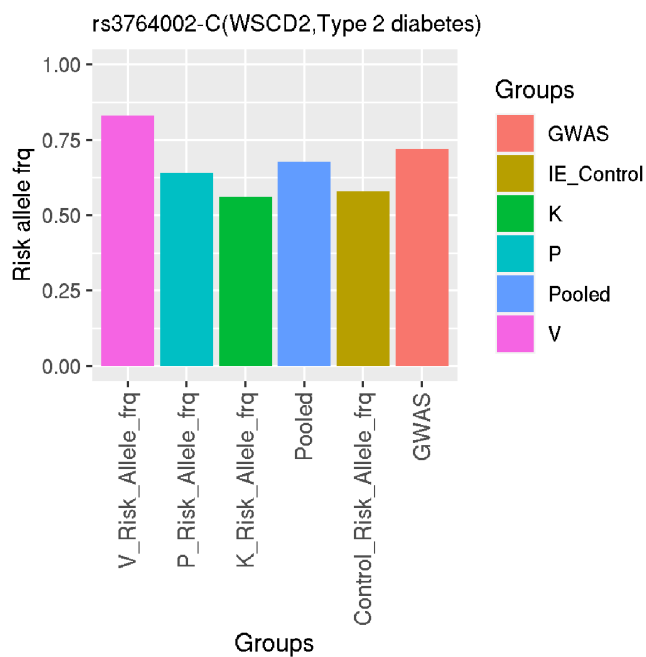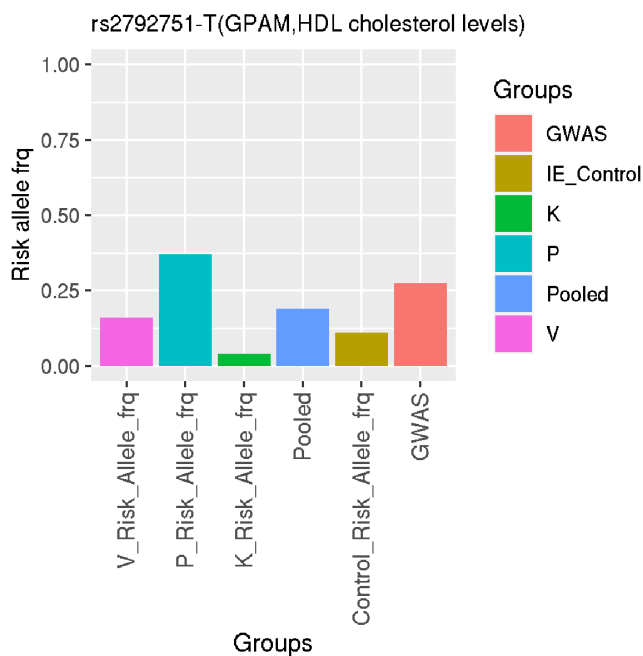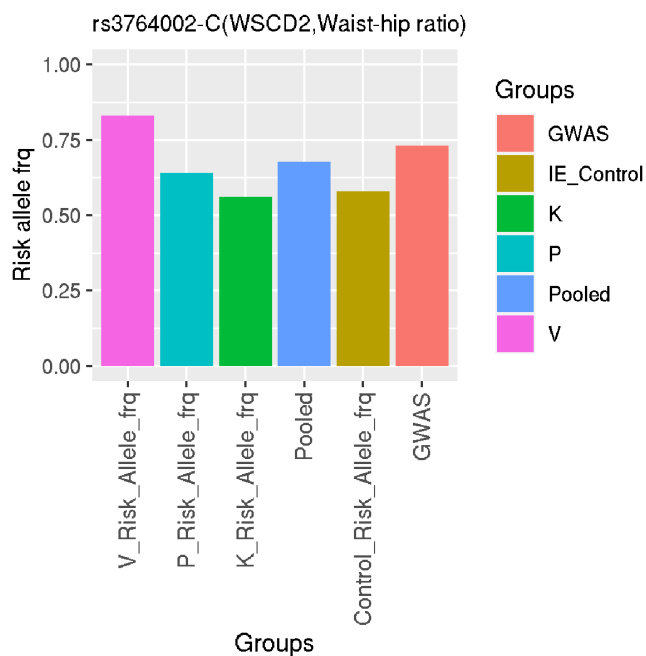

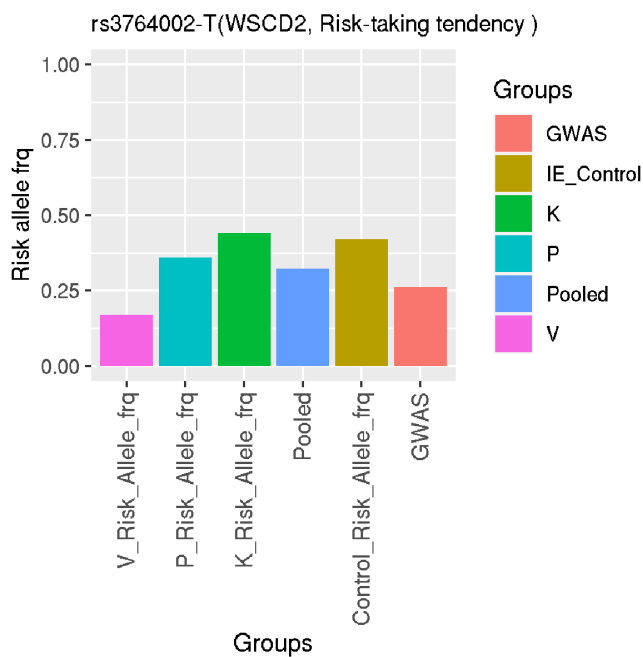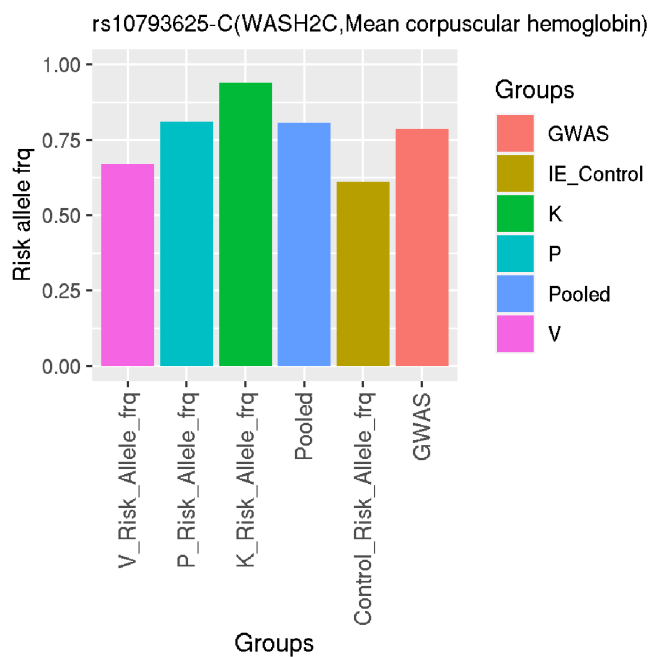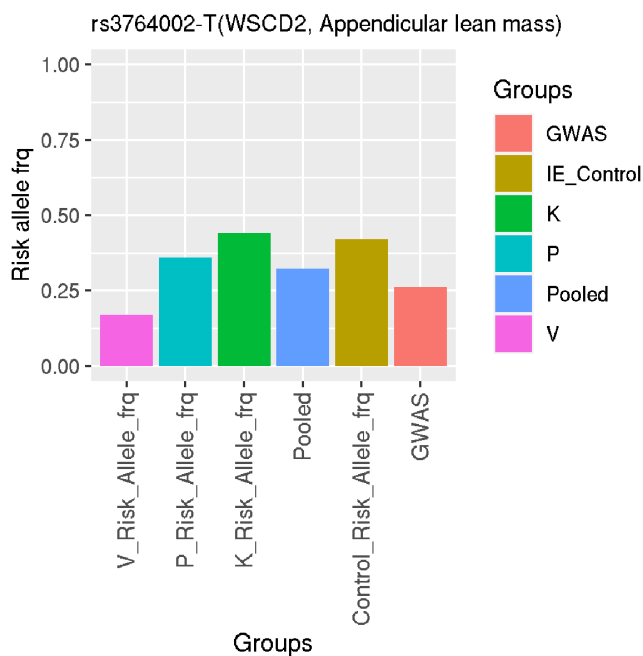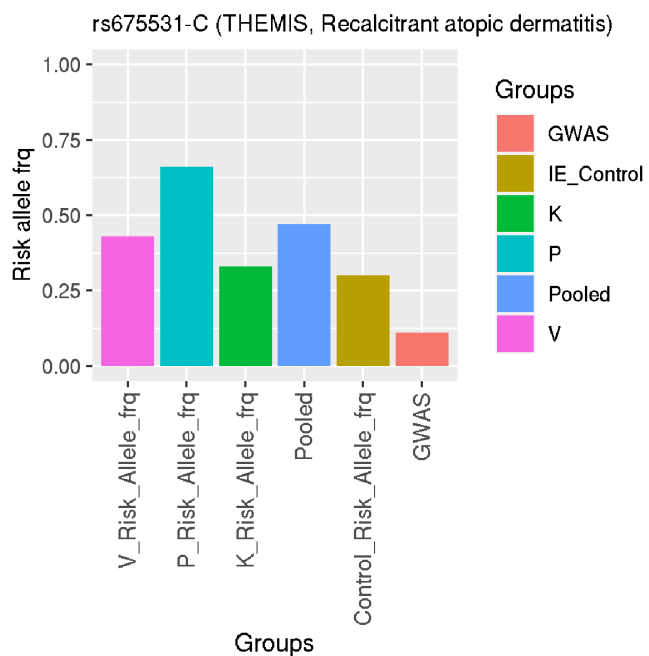

Supplement: s1 [file s1]

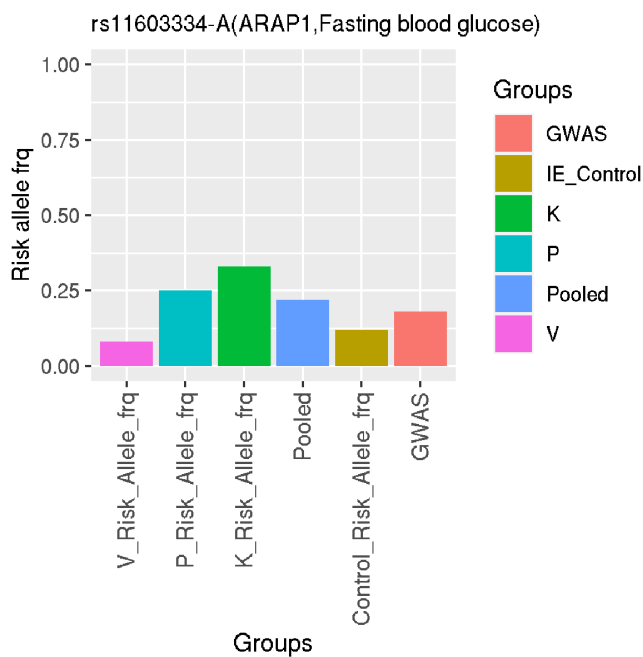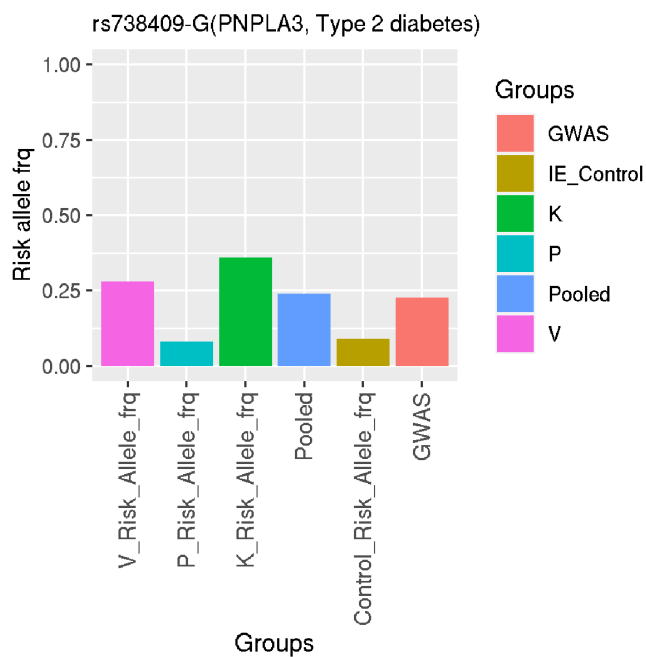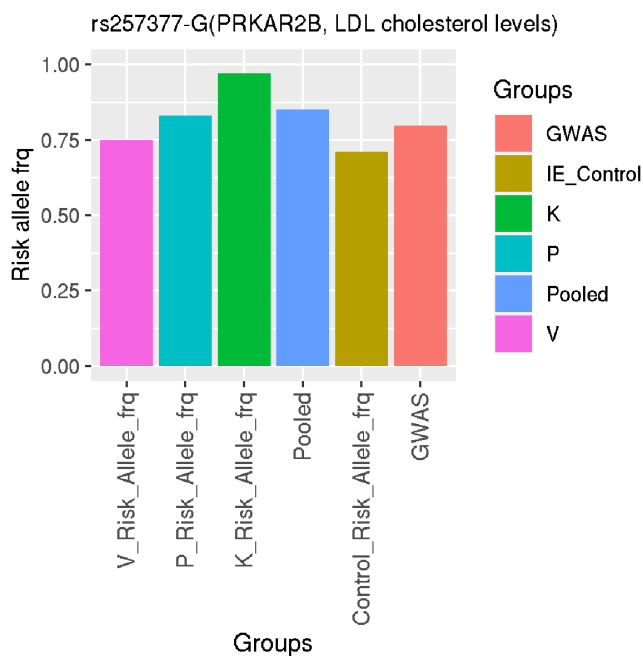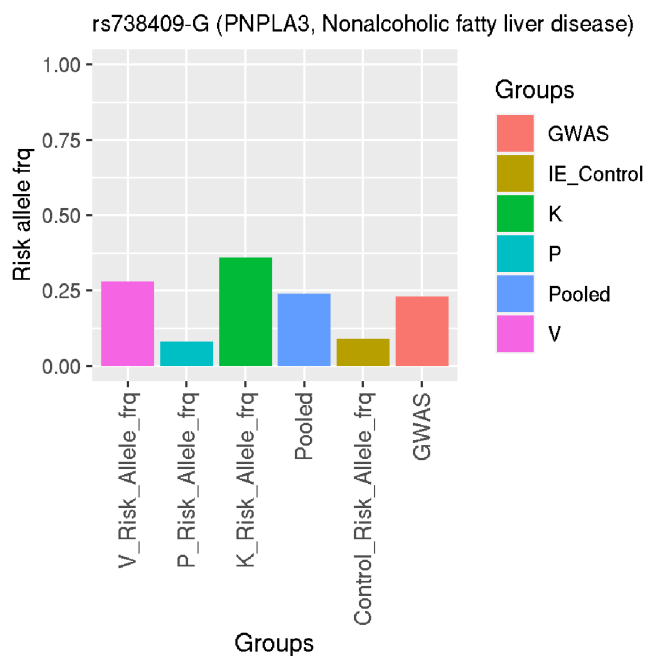

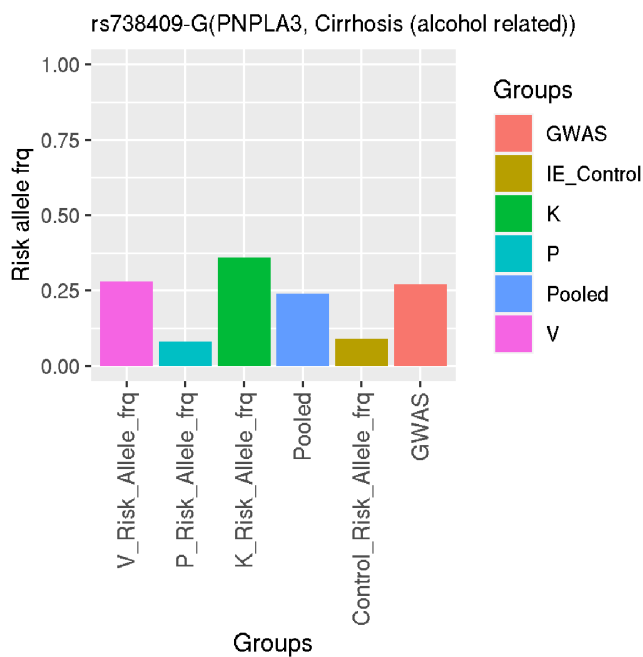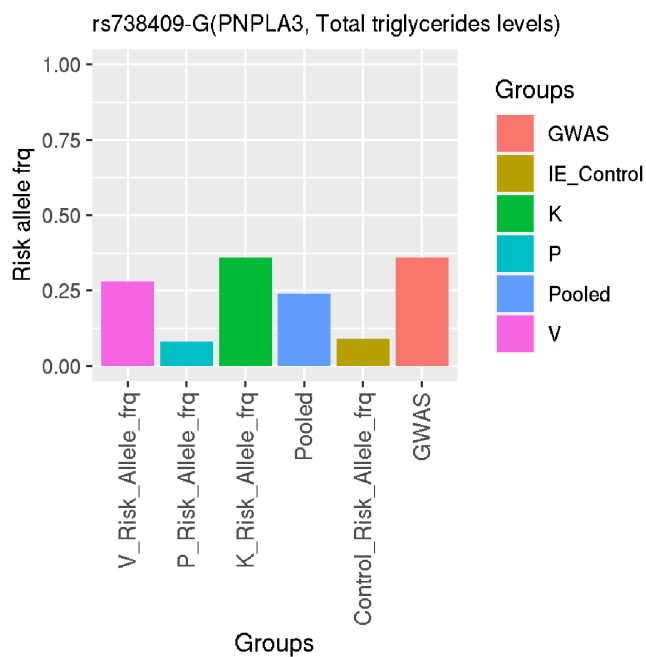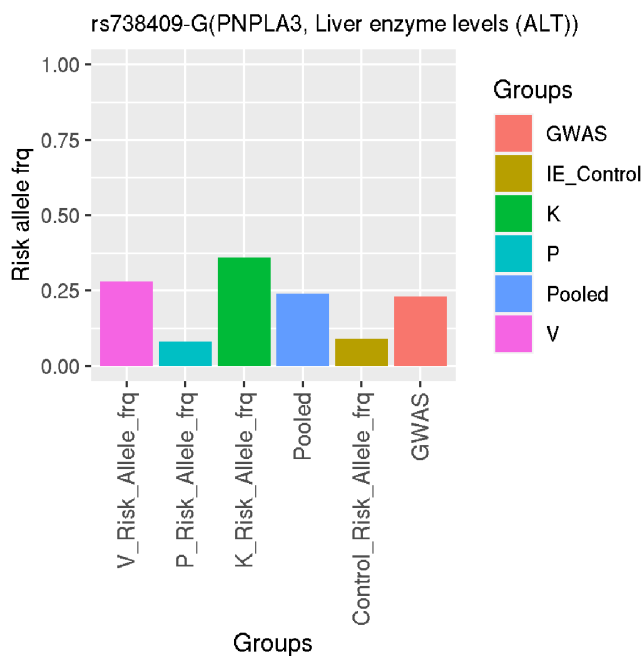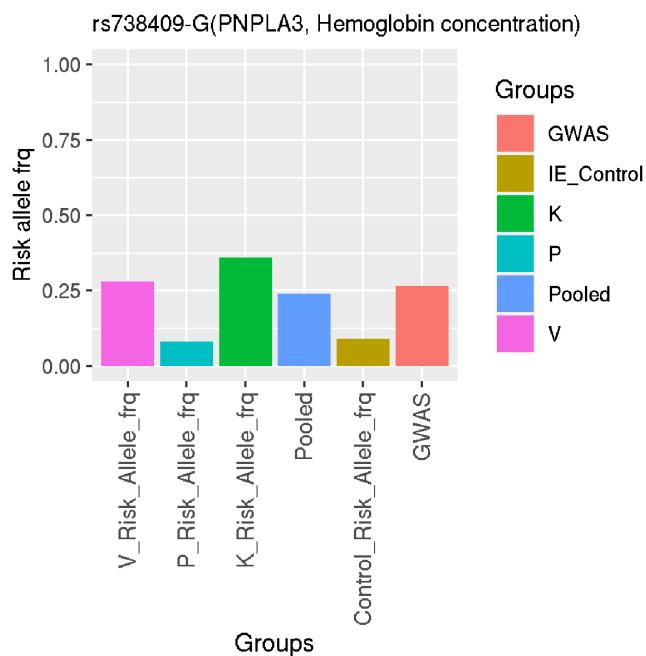

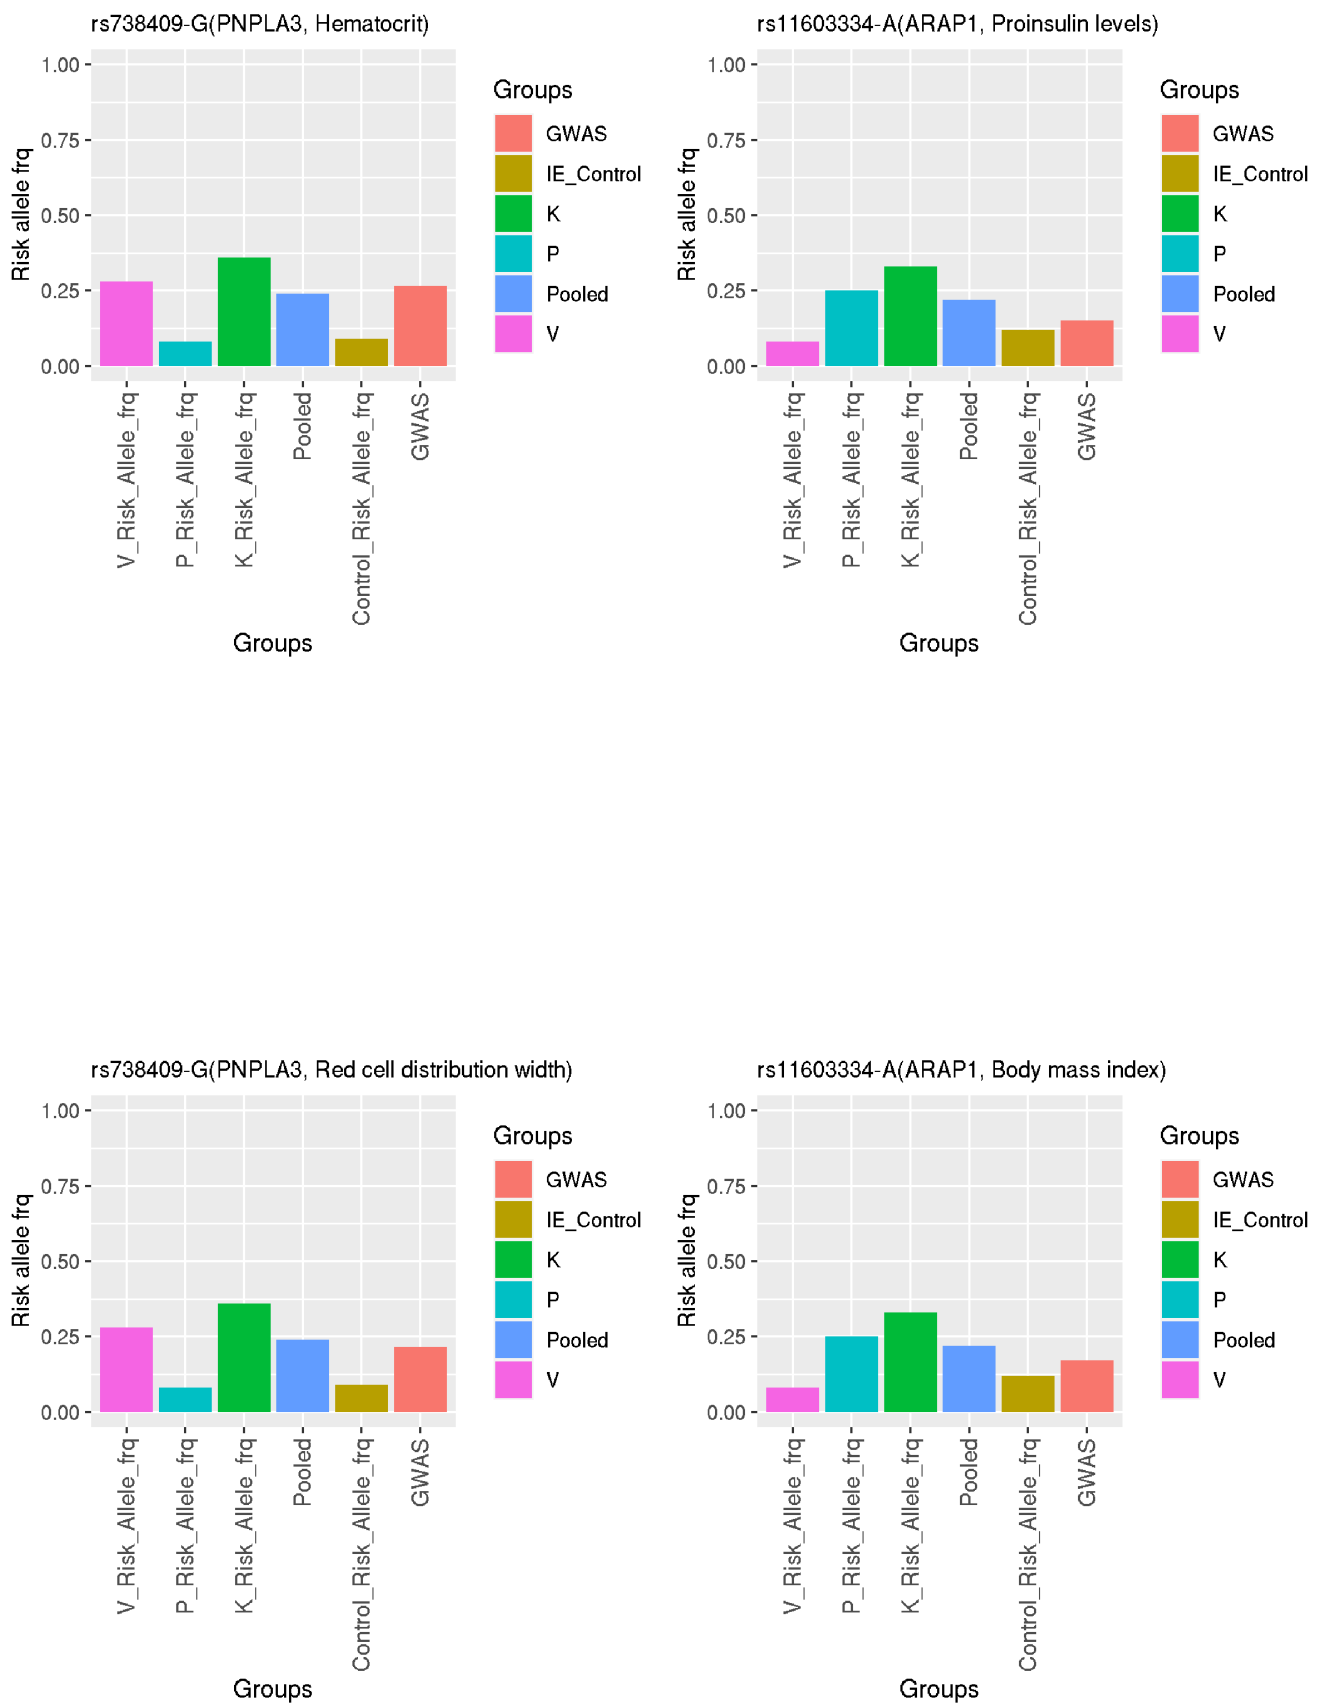

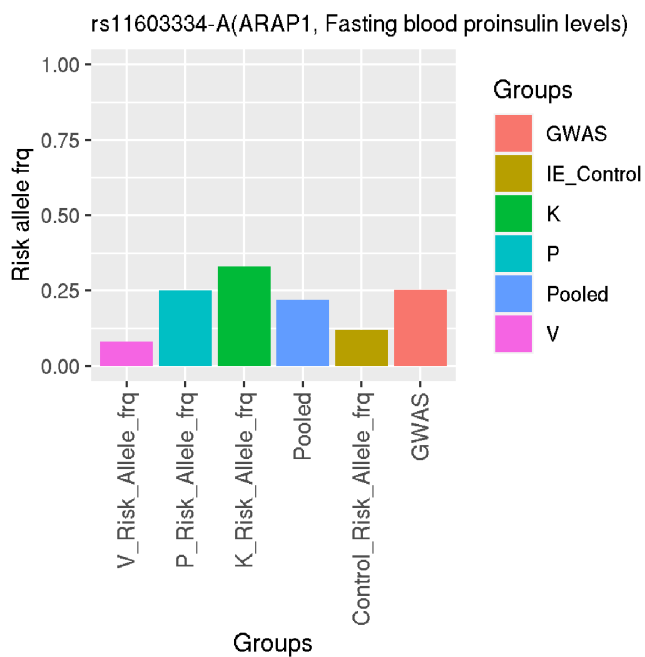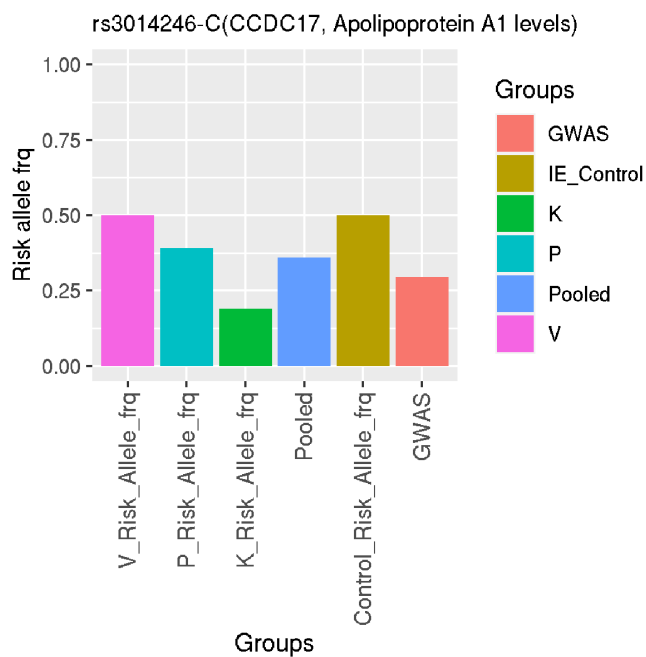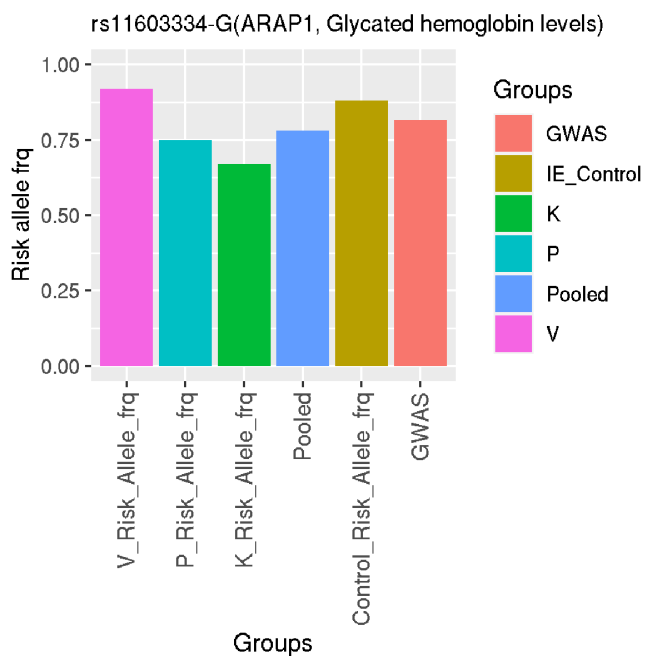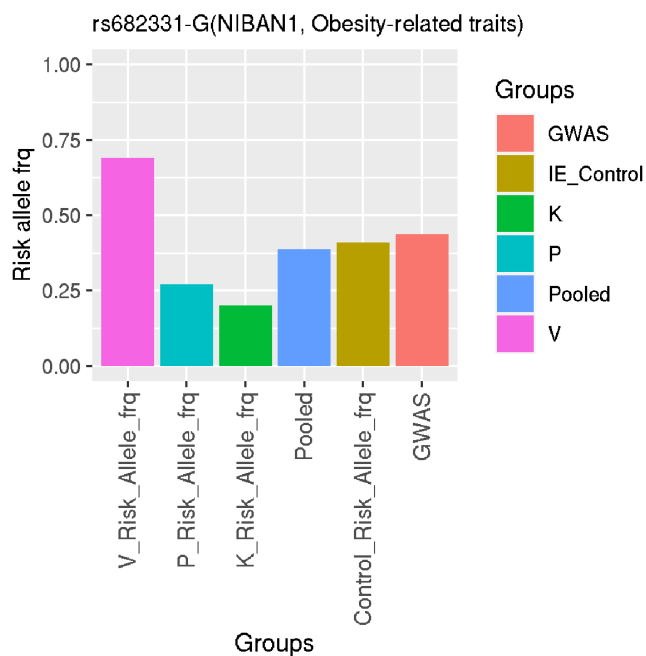

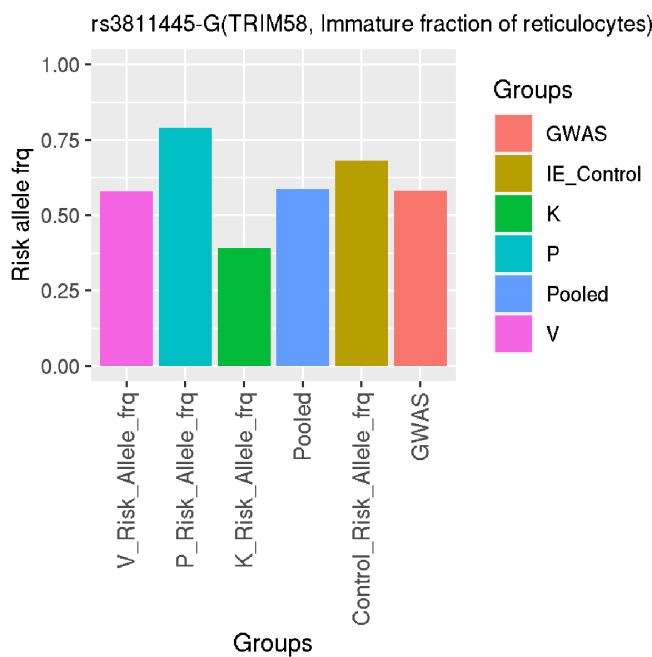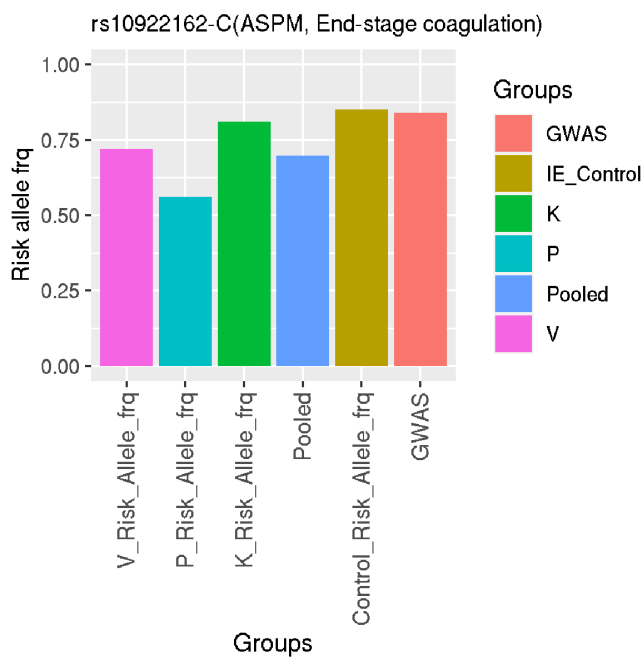

Supplement: s1 [file s1]
